# Supplementary material for: Early detection and surveillance of SARS-CoV-2 genomic variants in wastewater using COJAC
Source: PubMed Central journal article supplement (PMC9352586; doi:10.1038/s41564-022-01185-x), 2022-07-18
Supplement: 41564_2022_1185_MOESM4_ESM.pdf [file 41564_2022_1185_MOESM4_ESM.pdf]

We gratefully acknowledge the following Authors from the Originating laboratories responsible for obtaining the specimens, as well as the Submitting laboratories where the genome data were generated and shared via GISAID, on which this research is based.

All Submitters of data may be contacted directly via [www.gisaid.org](http://www.gisaid.org)

Authors are sorted alphabetically.

| Accession ID                                                                                                                                                                                                                                                                                                                                                                                                                                                                                                                                                                                                                                                                                                                                                                                                                                                                                                                                                                                                                                                                                                                                                                                                                                                                                                                                                                                                                                                                                                                                                                                                                                                                                                                                                                                                                                                                                                                                                                                                                                                                                                                                                                                                                                                                                                                                                                                                                                                                                                                                                                                                                                                                                                                                                                                                                                                                                                                                                                                                                                                                                                                                                                                                                                                                                                                                                                                                                                                                                                                                                                                                                                                                                                                                                                                                                                                                                                                                                                                                                                                                                                                                                                                                                                                                     | Originating Laboratory                                       | Submitting Laboratory                                                                                                                  | Authors                                                                                                                                                                                                                                                                                                                                                                                                                                                                  |
|----------------------------------------------------------------------------------------------------------------------------------------------------------------------------------------------------------------------------------------------------------------------------------------------------------------------------------------------------------------------------------------------------------------------------------------------------------------------------------------------------------------------------------------------------------------------------------------------------------------------------------------------------------------------------------------------------------------------------------------------------------------------------------------------------------------------------------------------------------------------------------------------------------------------------------------------------------------------------------------------------------------------------------------------------------------------------------------------------------------------------------------------------------------------------------------------------------------------------------------------------------------------------------------------------------------------------------------------------------------------------------------------------------------------------------------------------------------------------------------------------------------------------------------------------------------------------------------------------------------------------------------------------------------------------------------------------------------------------------------------------------------------------------------------------------------------------------------------------------------------------------------------------------------------------------------------------------------------------------------------------------------------------------------------------------------------------------------------------------------------------------------------------------------------------------------------------------------------------------------------------------------------------------------------------------------------------------------------------------------------------------------------------------------------------------------------------------------------------------------------------------------------------------------------------------------------------------------------------------------------------------------------------------------------------------------------------------------------------------------------------------------------------------------------------------------------------------------------------------------------------------------------------------------------------------------------------------------------------------------------------------------------------------------------------------------------------------------------------------------------------------------------------------------------------------------------------------------------------------------------------------------------------------------------------------------------------------------------------------------------------------------------------------------------------------------------------------------------------------------------------------------------------------------------------------------------------------------------------------------------------------------------------------------------------------------------------------------------------------------------------------------------------------------------------------------------------------------------------------------------------------------------------------------------------------------------------------------------------------------------------------------------------------------------------------------------------------------------------------------------------------------------------------------------------------------------------------------------------------------------------------------------------------|--------------------------------------------------------------|----------------------------------------------------------------------------------------------------------------------------------------|--------------------------------------------------------------------------------------------------------------------------------------------------------------------------------------------------------------------------------------------------------------------------------------------------------------------------------------------------------------------------------------------------------------------------------------------------------------------------|
| EPI_ISL_1004976, EPI_ISL_1004977, EPI_ISL_1004978, EPI_ISL_1004979, EPI_ISL_1004980, EPI_ISL_1004981, EPI_ISL_1004982, EPI_ISL_1004983, EPI_ISL_1004984, EPI_ISL_1004985, EPI_ISL_1004986, EPI_ISL_1004987, EPI_ISL_1004988, EPI_ISL_1004989, EPI_ISL_1004990, EPI_ISL_1004991, EPI_ISL_1004992, EPI_ISL_1004993, EPI_ISL_1004994, EPI_ISL_1004995, EPI_ISL_1004996, EPI_ISL_1004997, EPI_ISL_1004998, EPI_ISL_1004999, EPI_ISL_1005000, EPI_ISL_1005001, EPI_ISL_1005002, EPI_ISL_1005003, EPI_ISL_1005004, EPI_ISL_1005005, EPI_ISL_1005006, EPI_ISL_1005007, EPI_ISL_1005008, EPI_ISL_1005009, EPI_ISL_1005010, EPI_ISL_1005011, EPI_ISL_1005012, EPI_ISL_1005013, EPI_ISL_1005014, EPI_ISL_1005015, EPI_ISL_1005016, EPI_ISL_1005017, EPI_ISL_1005018, EPI_ISL_1005019, EPI_ISL_1005020, EPI_ISL_1005021, EPI_ISL_1005022, EPI_ISL_1005023, EPI_ISL_1005024, EPI_ISL_1005025, EPI_ISL_1005026, EPI_ISL_1005027, EPI_ISL_1005028, EPI_ISL_1005029, EPI_ISL_1005030, EPI_ISL_1005031, EPI_ISL_1005032, EPI_ISL_1005033, EPI_ISL_1005034, EPI_ISL_1005035, EPI_ISL_1005036, EPI_ISL_1005037, EPI_ISL_1005038, EPI_ISL_1005039, EPI_ISL_1005040, EPI_ISL_1005041, EPI_ISL_1005042, EPI_ISL_1005043, EPI_ISL_1005044, EPI_ISL_1005045, EPI_ISL_1005046, EPI_ISL_1005047, EPI_ISL_1005048, EPI_ISL_1005049, EPI_ISL_1005050, EPI_ISL_1005051, EPI_ISL_1005052, EPI_ISL_1005053, EPI_ISL_1005054, EPI_ISL_1005055, EPI_ISL_1005056, EPI_ISL_1005057, EPI_ISL_1005058, EPI_ISL_1005059, EPI_ISL_1005060, EPI_ISL_1005061, EPI_ISL_1005062, EPI_ISL_1005063, EPI_ISL_1005064, EPI_ISL_1005065, EPI_ISL_1005066, EPI_ISL_1005067, EPI_ISL_1005068, EPI_ISL_1005069, EPI_ISL_1005070, EPI_ISL_1005071, EPI_ISL_1005072, EPI_ISL_1005073, EPI_ISL_1005074, EPI_ISL_1005075, EPI_ISL_1005076, EPI_ISL_1005077, EPI_ISL_1005078, EPI_ISL_1005079, EPI_ISL_1005080, EPI_ISL_1005081, EPI_ISL_1005082, EPI_ISL_1005083, EPI_ISL_1005084, EPI_ISL_1005085, EPI_ISL_1005086, EPI_ISL_1005087, EPI_ISL_1005088, EPI_ISL_1005089, EPI_ISL_1005090, EPI_ISL_1005091, EPI_ISL_1005092, EPI_ISL_1005093, EPI_ISL_1005094, EPI_ISL_1005095, EPI_ISL_1005096, EPI_ISL_1005097, EPI_ISL_1005098, EPI_ISL_1005099, EPI_ISL_1005100, EPI_ISL_1005101, EPI_ISL_1005102, EPI_ISL_1005103, EPI_ISL_1005104, EPI_ISL_1005105, EPI_ISL_1005106, EPI_ISL_1005107, EPI_ISL_1005108, EPI_ISL_1005109, EPI_ISL_1005110, EPI_ISL_1005111, EPI_ISL_1005112, EPI_ISL_1005113, EPI_ISL_1005114, EPI_ISL_1005115, EPI_ISL_1005116, EPI_ISL_1005117, EPI_ISL_1005118, EPI_ISL_1005119, EPI_ISL_1005120, EPI_ISL_1005121, EPI_ISL_1005122, EPI_ISL_1005123, EPI_ISL_1005124, EPI_ISL_1005125, EPI_ISL_1005126, EPI_ISL_1005127, EPI_ISL_1005128, EPI_ISL_1005129, EPI_ISL_1005130, EPI_ISL_1005131, EPI_ISL_1005132, EPI_ISL_1005133, EPI_ISL_1005134, EPI_ISL_1005135, EPI_ISL_1005136, EPI_ISL_1005137, EPI_ISL_1005138, EPI_ISL_1005139, EPI_ISL_1005140, EPI_ISL_1005141, EPI_ISL_1005142, EPI_ISL_1005143, EPI_ISL_1005144, EPI_ISL_1005145, EPI_ISL_1005146, EPI_ISL_1005147, EPI_ISL_1005148, EPI_ISL_1005149, EPI_ISL_1005150, EPI_ISL_1005151, EPI_ISL_1005152, EPI_ISL_1005153, EPI_ISL_1005154, EPI_ISL_1005155, EPI_ISL_1005156, EPI_ISL_1005157, EPI_ISL_1005158, EPI_ISL_1005159, EPI_ISL_1005160, EPI_ISL_1005161, EPI_ISL_1005162, EPI_ISL_1005163, EPI_ISL_1005164, EPI_ISL_1005165, EPI_ISL_1005166, EPI_ISL_1005167, EPI_ISL_1005168, EPI_ISL_1005169, EPI_ISL_1005170, EPI_ISL_1005171, EPI_ISL_1005172, EPI_ISL_1005173, EPI_ISL_1005174, EPI_ISL_1005175, EPI_ISL_1005176, EPI_ISL_1005177, EPI_ISL_1005178, EPI_ISL_1005179, EPI_ISL_1005180, EPI_ISL_1005181, EPI_ISL_1005182, EPI_ISL_1005183, EPI_ISL_1005184, EPI_ISL_1005185, EPI_ISL_1005186, EPI_ISL_1005187, EPI_ISL_1005188, EPI_ISL_1005189, EPI_ISL_1005190, EPI_ISL_1005191, EPI_ISL_1005192, EPI_ISL_1005193, EPI_ISL_1005194, EPI_ISL_1005195, EPI_ISL_1005196, EPI_ISL_1005197, EPI_ISL_1005198, EPI_ISL_1005199, EPI_ISL_1005200, EPI_ISL_1005201, EPI_ISL_1005202, EPI_ISL_1005203, EPI_ISL_1005204, EPI_ISL_1005205, EPI_ISL_1005206, EPI_ISL_1005207, EPI_ISL_1005208, EPI_ISL_1005209, EPI_ISL_1005210, EPI_ISL_1005211, EPI_ISL_1005212, EPI_ISL_1005213, EPI_ISL_1005214, EPI_ISL_1005215, EPI_ISL_1005216, EPI_ISL_1005217 |                                                              |                                                                                                                                        |                                                                                                                                                                                                                                                                                                                                                                                                                                                                          |
| see above                                                                                                                                                                                                                                                                                                                                                                                                                                                                                                                                                                                                                                                                                                                                                                                                                                                                                                                                                                                                                                                                                                                                                                                                                                                                                                                                                                                                                                                                                                                                                                                                                                                                                                                                                                                                                                                                                                                                                                                                                                                                                                                                                                                                                                                                                                                                                                                                                                                                                                                                                                                                                                                                                                                                                                                                                                                                                                                                                                                                                                                                                                                                                                                                                                                                                                                                                                                                                                                                                                                                                                                                                                                                                                                                                                                                                                                                                                                                                                                                                                                                                                                                                                                                                                                                        | Viollier AG                                                  | Department of Biosystems Science and Engineering, ETH Zürich                                                                           | Chaoran Chen, Sarah Nadeau, Catharine Aquino, Ivan Topolsky, Philipp Jablonski, Lara Fuhrmann, David Dreifuss, Katharina Jahn, Andreia Cabral de Gouvea, Maria Domenica Moccia, Simon Grüter, Timothy Sykes, Lennart Opitz, Griffin White, Laura Neff, Doris Popovic, Andrea Patrignani, Jay Tracy, Ralph Schlapbach, Christiane Beckmann, Maurice Redondo, Olivier Kobel, Christoph Noppen, Sophie Seidel, Noemie Santamaria de Souza, Niko Beerenwinkel, Tanja Stadler |
| EPI_ISL_1005699                                                                                                                                                                                                                                                                                                                                                                                                                                                                                                                                                                                                                                                                                                                                                                                                                                                                                                                                                                                                                                                                                                                                                                                                                                                                                                                                                                                                                                                                                                                                                                                                                                                                                                                                                                                                                                                                                                                                                                                                                                                                                                                                                                                                                                                                                                                                                                                                                                                                                                                                                                                                                                                                                                                                                                                                                                                                                                                                                                                                                                                                                                                                                                                                                                                                                                                                                                                                                                                                                                                                                                                                                                                                                                                                                                                                                                                                                                                                                                                                                                                                                                                                                                                                                                                                  | Clinical Laboratory, Vetsuisse Faculty, University of Zurich | Department of Biosystems Science and Engineering, ETH Zürich                                                                           | Julia Klaus, Marina Luisa Meli, Regina Hofmann-Lehmann, Christian Beisel, Sarah Nadeau, Chaoran Chen, Ivan Topolsky, Philipp Jablonski, Lara Fuhrmann, David Dreifuss, Katharina Jahn, Rebecca Denes, Ina Nissen, Natascha Santacroce, Elodie Burcklen, Niko Beerenwinkel, Tanja Stadler                                                                                                                                                                                 |
| EPI_ISL_1007615                                                                                                                                                                                                                                                                                                                                                                                                                                                                                                                                                                                                                                                                                                                                                                                                                                                                                                                                                                                                                                                                                                                                                                                                                                                                                                                                                                                                                                                                                                                                                                                                                                                                                                                                                                                                                                                                                                                                                                                                                                                                                                                                                                                                                                                                                                                                                                                                                                                                                                                                                                                                                                                                                                                                                                                                                                                                                                                                                                                                                                                                                                                                                                                                                                                                                                                                                                                                                                                                                                                                                                                                                                                                                                                                                                                                                                                                                                                                                                                                                                                                                                                                                                                                                                                                  | CHUV                                                         | Laboratory of genomics and metagenomics, Institute of Microbiology, University Hospital Centre and University of Lausanne, Switzerland | Trestan Pillonel, Damien Jacot, Sébastien Aeby, Gilbert Greub, Claire Bertelli                                                                                                                                                                                                                                                                                                                                                                                           |
| EPI_ISL_1014691                                                                                                                                                                                                                                                                                                                                                                                                                                                                                                                                                                                                                                                                                                                                                                                                                                                                                                                                                                                                                                                                                                                                                                                                                                                                                                                                                                                                                                                                                                                                                                                                                                                                                                                                                                                                                                                                                                                                                                                                                                                                                                                                                                                                                                                                                                                                                                                                                                                                                                                                                                                                                                                                                                                                                                                                                                                                                                                                                                                                                                                                                                                                                                                                                                                                                                                                                                                                                                                                                                                                                                                                                                                                                                                                                                                                                                                                                                                                                                                                                                                                                                                                                                                                                                                                  | University Hospital Basel, Clinical Virology                 | University Hospital Basel, Clinical Bacteriology                                                                                       | Tim Roloff, Madlen Stange, Helena MB Seth-Smith, Alfredo Mari, Karoline Leuzinger, Julia Bielicki, Manuel Battegay, Hans Hirsch, Adrian Egli                                                                                                                                                                                                                                                                                                                             |
| EPI_ISL_1118935, EPI_ISL_1118936, EPI_ISL_1118938, EPI_ISL_1118939, EPI_ISL_1118943                                                                                                                                                                                                                                                                                                                                                                                                                                                                                                                                                                                                                                                                                                                                                                                                                                                                                                                                                                                                                                                                                                                                                                                                                                                                                                                                                                                                                                                                                                                                                                                                                                                                                                                                                                                                                                                                                                                                                                                                                                                                                                                                                                                                                                                                                                                                                                                                                                                                                                                                                                                                                                                                                                                                                                                                                                                                                                                                                                                                                                                                                                                                                                                                                                                                                                                                                                                                                                                                                                                                                                                                                                                                                                                                                                                                                                                                                                                                                                                                                                                                                                                                                                                              | Viollier AG                                                  | Department of Biosystems Science and Engineering, ETH Zürich                                                                           | Chaoran Chen, Sarah Nadeau, Catharine Aquino, Ivan Topolsky, Philipp Jablonski, Lara Fuhrmann, David Dreifuss, Katharina Jahn, Andreia Cabral de Gouvea, Maria Domenica Moccia, Simon Grüter, Timothy Sykes, Lennart Opitz, Griffin White, Laura Neff, Doris Popovic, Andrea Patrignani, Jay Tracy, Ralph Schlapbach, Christiane Beckmann, Maurice Redondo, Olivier Kobel, Christoph Noppen, Sophie Seidel, Noemie Santamaria de Souza, Niko Beerenwinkel, Tanja Stadler |
| EPI_ISL_1118945, EPI_ISL_1118947, EPI_ISL_1118948                                                                                                                                                                                                                                                                                                                                                                                                                                                                                                                                                                                                                                                                                                                                                                                                                                                                                                                                                                                                                                                                                                                                                                                                                                                                                                                                                                                                                                                                                                                                                                                                                                                                                                                                                                                                                                                                                                                                                                                                                                                                                                                                                                                                                                                                                                                                                                                                                                                                                                                                                                                                                                                                                                                                                                                                                                                                                                                                                                                                                                                                                                                                                                                                                                                                                                                                                                                                                                                                                                                                                                                                                                                                                                                                                                                                                                                                                                                                                                                                                                                                                                                                                                                                                                | Viollier AG                                                  | Department of Biosystems Science and Engineering, ETH Zürich                                                                           | Chaoran Chen, Sarah Nadeau, Ivan Topolsky, Emmanouil Dermizakis, Keith Harshman, Ioannis Xenarios, Henri Pegeot, Lorenzo Cerutti, Deborah Penet, Philipp Jablonski, Lara Fuhrmann, David Dreifuss, Katharina Jahn, Christiane Beckmann, Maurice Redondo, Olivier Kobel, Christoph Noppen, Sophie Seidel, Noemie Santamaria de Souza, Niko Beerenwinkel, Tanja Stadler                                                                                                    |
| EPI_ISL_1118949, EPI_ISL_1118950                                                                                                                                                                                                                                                                                                                                                                                                                                                                                                                                                                                                                                                                                                                                                                                                                                                                                                                                                                                                                                                                                                                                                                                                                                                                                                                                                                                                                                                                                                                                                                                                                                                                                                                                                                                                                                                                                                                                                                                                                                                                                                                                                                                                                                                                                                                                                                                                                                                                                                                                                                                                                                                                                                                                                                                                                                                                                                                                                                                                                                                                                                                                                                                                                                                                                                                                                                                                                                                                                                                                                                                                                                                                                                                                                                                                                                                                                                                                                                                                                                                                                                                                                                                                                                                 | Viollier AG                                                  | Department of Biosystems Science and Engineering, ETH Zürich                                                                           | Chaoran Chen, Sarah Nadeau, Catharine Aquino, Ivan Topolsky, Philipp Jablonski, Lara Fuhrmann, David Dreifuss, Katharina Jahn, Andreia Cabral de Gouvea, Maria Domenica Moccia, Simon Grüter, Timothy Sykes, Lennart Opitz, Griffin White, Laura Neff, Doris Popovic, Andrea Patrignani, Jay Tracy, Ralph Schlapbach, Christiane Beckmann, Maurice Redondo, Olivier Kobel, Christoph Noppen, Sophie Seidel, Noemie Santamaria de Souza, Niko Beerenwinkel, Tanja Stadler |
| EPI_ISL_1118953, EPI_ISL_1118956, EPI_ISL_1118957, EPI_ISL_1118958                                                                                                                                                                                                                                                                                                                                                                                                                                                                                                                                                                                                                                                                                                                                                                                                                                                                                                                                                                                                                                                                                                                                                                                                                                                                                                                                                                                                                                                                                                                                                                                                                                                                                                                                                                                                                                                                                                                                                                                                                                                                                                                                                                                                                                                                                                                                                                                                                                                                                                                                                                                                                                                                                                                                                                                                                                                                                                                                                                                                                                                                                                                                                                                                                                                                                                                                                                                                                                                                                                                                                                                                                                                                                                                                                                                                                                                                                                                                                                                                                                                                                                                                                                                                               | Viollier AG                                                  | Department of Biosystems Science and Engineering, ETH Zürich                                                                           | Chaoran Chen, Sarah Nadeau, Ivan Topolsky, Emmanouil Dermizakis, Keith Harshman, Ioannis Xenarios, Henri Pegeot, Lorenzo Cerutti, Deborah Penet, Philipp Jablonski, Lara Fuhrmann, David Dreifuss, Katharina Jahn, Christiane Beckmann, Maurice Redondo, Olivier Kobel, Christoph Noppen, Sophie Seidel, Noemie Santamaria de Souza, Niko Beerenwinkel, Tanja Stadler                                                                                                    |
| EPI_ISL_1118960, EPI_ISL_1118962, EPI_ISL_1118964                                                                                                                                                                                                                                                                                                                                                                                                                                                                                                                                                                                                                                                                                                                                                                                                                                                                                                                                                                                                                                                                                                                                                                                                                                                                                                                                                                                                                                                                                                                                                                                                                                                                                                                                                                                                                                                                                                                                                                                                                                                                                                                                                                                                                                                                                                                                                                                                                                                                                                                                                                                                                                                                                                                                                                                                                                                                                                                                                                                                                                                                                                                                                                                                                                                                                                                                                                                                                                                                                                                                                                                                                                                                                                                                                                                                                                                                                                                                                                                                                                                                                                                                                                                                                                | Viollier AG                                                  | Department of Biosystems Science and Engineering, ETH Zürich                                                                           | Chaoran Chen, Sarah Nadeau, Catharine Aquino, Ivan Topolsky, Philipp Jablonski, Lara Fuhrmann, David Dreifuss, Katharina Jahn, Andreia Cabral de Gouvea, Maria Domenica Moccia, Simon Grüter, Timothy Sykes, Lennart Opitz, Griffin White, Laura Neff, Doris Popovic, Andrea Patrignani, Jay Tracy, Ralph Schlapbach, Christiane Beckmann, Maurice Redondo, Olivier Kobel, Christoph Noppen, Sophie Seidel, Noemie Santamaria de Souza, Niko Beerenwinkel, Tanja Stadler |
| EPI_ISL_1118965                                                                                                                                                                                                                                                                                                                                                                                                                                                                                                                                                                                                                                                                                                                                                                                                                                                                                                                                                                                                                                                                                                                                                                                                                                                                                                                                                                                                                                                                                                                                                                                                                                                                                                                                                                                                                                                                                                                                                                                                                                                                                                                                                                                                                                                                                                                                                                                                                                                                                                                                                                                                                                                                                                                                                                                                                                                                                                                                                                                                                                                                                                                                                                                                                                                                                                                                                                                                                                                                                                                                                                                                                                                                                                                                                                                                                                                                                                                                                                                                                                                                                                                                                                                                                                                                  | Viollier AG                                                  | Department of Biosystems Science and Engineering, ETH Zürich                                                                           | Chaoran Chen, Sarah Nadeau, Ivan Topolsky, Emmanouil Dermizakis, Keith Harshman, Ioannis Xenarios, Henri Pegeot, Lorenzo Cerutti, Deborah Penet, Philipp Jablonski, Lara Fuhrmann, David Dreifuss, Katharina Jahn, Christiane Beckmann, Maurice Redondo, Olivier Kobel, Christoph Noppen, Sophie Seidel, Noemie Santamaria de Souza, Niko Beerenwinkel, Tanja Stadler                                                                                                    |
| EPI_ISL_1118968                                                                                                                                                                                                                                                                                                                                                                                                                                                                                                                                                                                                                                                                                                                                                                                                                                                                                                                                                                                                                                                                                                                                                                                                                                                                                                                                                                                                                                                                                                                                                                                                                                                                                                                                                                                                                                                                                                                                                                                                                                                                                                                                                                                                                                                                                                                                                                                                                                                                                                                                                                                                                                                                                                                                                                                                                                                                                                                                                                                                                                                                                                                                                                                                                                                                                                                                                                                                                                                                                                                                                                                                                                                                                                                                                                                                                                                                                                                                                                                                                                                                                                                                                                                                                                                                  | Viollier AG                                                  | Department of Biosystems Science and Engineering, ETH Zürich                                                                           | Chaoran Chen, Sarah Nadeau, Catharine Aquino, Ivan Topolsky, Philipp Jablonski, Lara Fuhrmann, David Dreifuss, Katharina Jahn, Andreia Cabral de Gouvea, Maria Domenica Moccia, Simon Grüter, Timothy Sykes, Lennart Opitz, Griffin White, Laura Neff, Doris Popovic, Andrea Patrignani, Jay Tracy, Ralph Schlapbach, Christiane Beckmann, Maurice Redondo, Olivier Kobel, Christoph Noppen, Sophie Seidel, Noemie Santamaria de Souza, Niko Beerenwinkel, Tanja Stadler |
| EPI_ISL_1118969                                                                                                                                                                                                                                                                                                                                                                                                                                                                                                                                                                                                                                                                                                                                                                                                                                                                                                                                                                                                                                                                                                                                                                                                                                                                                                                                                                                                                                                                                                                                                                                                                                                                                                                                                                                                                                                                                                                                                                                                                                                                                                                                                                                                                                                                                                                                                                                                                                                                                                                                                                                                                                                                                                                                                                                                                                                                                                                                                                                                                                                                                                                                                                                                                                                                                                                                                                                                                                                                                                                                                                                                                                                                                                                                                                                                                                                                                                                                                                                                                                                                                                                                                                                                                                                                  | Viollier AG                                                  | Department of Biosystems Science and Engineering, ETH Zürich                                                                           | Chaoran Chen, Sarah Nadeau, Ivan Topolsky, Emmanouil Dermizakis, Keith Harshman, Ioannis Xenarios, Henri Pegeot, Lorenzo Cerutti, Deborah Penet, Philipp Jablonski, Lara Fuhrmann, David Dreifuss, Katharina Jahn, Christiane Beckmann, Maurice Redondo, Olivier Kobel, Christoph Noppen, Sophie Seidel, Noemie Santamaria de Souza, Niko Beerenwinkel, Tanja Stadler                                                                                                    |
| EPI_ISL_1118970, EPI_ISL_1118972, EPI_ISL_1118973, EPI_ISL_1118974, EPI_ISL_1118975, EPI_ISL_1118980                                                                                                                                                                                                                                                                                                                                                                                                                                                                                                                                                                                                                                                                                                                                                                                                                                                                                                                                                                                                                                                                                                                                                                                                                                                                                                                                                                                                                                                                                                                                                                                                                                                                                                                                                                                                                                                                                                                                                                                                                                                                                                                                                                                                                                                                                                                                                                                                                                                                                                                                                                                                                                                                                                                                                                                                                                                                                                                                                                                                                                                                                                                                                                                                                                                                                                                                                                                                                                                                                                                                                                                                                                                                                                                                                                                                                                                                                                                                                                                                                                                                                                                                                                             | Viollier AG                                                  | Department of Biosystems Science and Engineering, ETH Zürich                                                                           | Chaoran Chen, Sarah Nadeau, Catharine Aquino, Ivan Topolsky, Philipp Jablonski, Lara Fuhrmann, David Dreifuss, Katharina Jahn, Andreia Cabral de Gouvea, Maria Domenica Moccia, Simon Grüter, Timothy Sykes, Lennart Opitz, Griffin White, Laura Neff, Doris Popovic, Andrea Patrignani, Jay Tracy, Ralph Schlapbach, Christiane Beckmann, Maurice Redondo, Olivier Kobel, Christoph Noppen, Sophie Seidel, Noemie Santamaria de Souza, Niko Beerenwinkel, Tanja Stadler |
| EPI_ISL_1118983                                                                                                                                                                                                                                                                                                                                                                                                                                                                                                                                                                                                                                                                                                                                                                                                                                                                                                                                                                                                                                                                                                                                                                                                                                                                                                                                                                                                                                                                                                                                                                                                                                                                                                                                                                                                                                                                                                                                                                                                                                                                                                                                                                                                                                                                                                                                                                                                                                                                                                                                                                                                                                                                                                                                                                                                                                                                                                                                                                                                                                                                                                                                                                                                                                                                                                                                                                                                                                                                                                                                                                                                                                                                                                                                                                                                                                                                                                                                                                                                                                                                                                                                                                                                                                                                  | Viollier AG                                                  | Department of Biosystems Science and Engineering, ETH Zürich                                                                           | Chaoran Chen, Sarah Nadeau, Ivan Topolsky, Emmanouil Dermizakis, Keith Harshman, Ioannis Xenarios, Henri Pegeot, Lorenzo Cerutti, Deborah Penet, Philipp Jablonski, Lara Fuhrmann, David Dreifuss, Katharina Jahn, Christiane Beckmann, Maurice Redondo, Olivier Kobel, Christoph Noppen, Sophie Seidel, Noemie Santamaria de Souza, Niko Beerenwinkel, Tanja Stadler                                                                                                    |
| EPI_ISL_1118984, EPI_ISL_1118985, EPI_ISL_1118986, EPI_ISL_1118987, EPI_ISL_1118990, EPI_ISL_1118991, EPI_ISL_1118992, EPI_ISL_1118994                                                                                                                                                                                                                                                                                                                                                                                                                                                                                                                                                                                                                                                                                                                                                                                                                                                                                                                                                                                                                                                                                                                                                                                                                                                                                                                                                                                                                                                                                                                                                                                                                                                                                                                                                                                                                                                                                                                                                                                                                                                                                                                                                                                                                                                                                                                                                                                                                                                                                                                                                                                                                                                                                                                                                                                                                                                                                                                                                                                                                                                                                                                                                                                                                                                                                                                                                                                                                                                                                                                                                                                                                                                                                                                                                                                                                                                                                                                                                                                                                                                                                                                                           | Viollier AG                                                  | Department of Biosystems Science and Engineering, ETH Zürich                                                                           | Chaoran Chen, Sarah Nadeau, Catharine Aquino, Ivan Topolsky, Philipp Jablonski, Lara Fuhrmann, David Dreifuss, Katharina Jahn, Andreia Cabral de Gouvea, Maria Domenica Moccia, Simon Grüter, Timothy Sykes, Lennart Opitz, Griffin White, Laura Neff, Doris Popovic, Andrea Patrignani, Jay Tracy, Ralph Schlapbach, Christiane Beckmann, Maurice Redondo, Olivier Kobel, Christoph Noppen, Sophie Seidel, Noemie Santamaria de Souza, Niko Beerenwinkel, Tanja Stadler |
| EPI_ISL_1118995                                                                                                                                                                                                                                                                                                                                                                                                                                                                                                                                                                                                                                                                                                                                                                                                                                                                                                                                                                                                                                                                                                                                                                                                                                                                                                                                                                                                                                                                                                                                                                                                                                                                                                                                                                                                                                                                                                                                                                                                                                                                                                                                                                                                                                                                                                                                                                                                                                                                                                                                                                                                                                                                                                                                                                                                                                                                                                                                                                                                                                                                                                                                                                                                                                                                                                                                                                                                                                                                                                                                                                                                                                                                                                                                                                                                                                                                                                                                                                                                                                                                                                                                                                                                                                                                  | Viollier AG                                                  | Department of Biosystems Science and Engineering, ETH Zürich                                                                           | Chaoran Chen, Sarah Nadeau, Ivan Topolsky, Emmanouil Dermizakis, Keith Harshman, Ioannis Xenarios, Henri Pegeot, Lorenzo Cerutti, Deborah Penet, Philipp Jablonski, Lara Fuhrmann, David Dreifuss, Katharina Jahn, Christiane Beckmann, Maurice Redondo, Olivier Kobel, Christoph Noppen, Sophie Seidel, Noemie Santamaria de Souza, Niko Beerenwinkel, Tanja Stadler                                                                                                    |

























































































|                                                                                                                                                                                                                                                                                                                                                                                                                                                                                                                                                                                                                                                                                                                                                                                                                                                                                                                                                                                                                                                                                                                                                                                                                                                                                                                                                                                                                                                                                                                                                                                                                                                                                                                                                                                                                                                                                                                                                                                                                                                                                                                                                                                                                                                                                                                                                                                                                                                                                                                                                                                                                                                                                                                                                                                                                                                                                                                                                                                                                                                                                                                                                                                                                                                                                                                                                                                                                                                                                                                                                                                                                                                                                                                                                                                                                                                                                                                                                                                                                                                                                                                                                                                                                                                                                                                                                                                                                                                                                                                                                                                                                                                                                                                                                                                                                                                                                                                                                                                                                                                                                                                                                                                                                                                                                                            |                                                             |                                                              |                                                                                                                                                                                                                                                                                                                                                                                                                                                                         |
|------------------------------------------------------------------------------------------------------------------------------------------------------------------------------------------------------------------------------------------------------------------------------------------------------------------------------------------------------------------------------------------------------------------------------------------------------------------------------------------------------------------------------------------------------------------------------------------------------------------------------------------------------------------------------------------------------------------------------------------------------------------------------------------------------------------------------------------------------------------------------------------------------------------------------------------------------------------------------------------------------------------------------------------------------------------------------------------------------------------------------------------------------------------------------------------------------------------------------------------------------------------------------------------------------------------------------------------------------------------------------------------------------------------------------------------------------------------------------------------------------------------------------------------------------------------------------------------------------------------------------------------------------------------------------------------------------------------------------------------------------------------------------------------------------------------------------------------------------------------------------------------------------------------------------------------------------------------------------------------------------------------------------------------------------------------------------------------------------------------------------------------------------------------------------------------------------------------------------------------------------------------------------------------------------------------------------------------------------------------------------------------------------------------------------------------------------------------------------------------------------------------------------------------------------------------------------------------------------------------------------------------------------------------------------------------------------------------------------------------------------------------------------------------------------------------------------------------------------------------------------------------------------------------------------------------------------------------------------------------------------------------------------------------------------------------------------------------------------------------------------------------------------------------------------------------------------------------------------------------------------------------------------------------------------------------------------------------------------------------------------------------------------------------------------------------------------------------------------------------------------------------------------------------------------------------------------------------------------------------------------------------------------------------------------------------------------------------------------------------------------------------------------------------------------------------------------------------------------------------------------------------------------------------------------------------------------------------------------------------------------------------------------------------------------------------------------------------------------------------------------------------------------------------------------------------------------------------------------------------------------------------------------------------------------------------------------------------------------------------------------------------------------------------------------------------------------------------------------------------------------------------------------------------------------------------------------------------------------------------------------------------------------------------------------------------------------------------------------------------------------------------------------------------------------------------------------------------------------------------------------------------------------------------------------------------------------------------------------------------------------------------------------------------------------------------------------------------------------------------------------------------------------------------------------------------------------------------------------------------------------------------------------------------------------------|-------------------------------------------------------------|--------------------------------------------------------------|-------------------------------------------------------------------------------------------------------------------------------------------------------------------------------------------------------------------------------------------------------------------------------------------------------------------------------------------------------------------------------------------------------------------------------------------------------------------------|
| EPI_ISL_1408869                                                                                                                                                                                                                                                                                                                                                                                                                                                                                                                                                                                                                                                                                                                                                                                                                                                                                                                                                                                                                                                                                                                                                                                                                                                                                                                                                                                                                                                                                                                                                                                                                                                                                                                                                                                                                                                                                                                                                                                                                                                                                                                                                                                                                                                                                                                                                                                                                                                                                                                                                                                                                                                                                                                                                                                                                                                                                                                                                                                                                                                                                                                                                                                                                                                                                                                                                                                                                                                                                                                                                                                                                                                                                                                                                                                                                                                                                                                                                                                                                                                                                                                                                                                                                                                                                                                                                                                                                                                                                                                                                                                                                                                                                                                                                                                                                                                                                                                                                                                                                                                                                                                                                                                                                                                                                            | Viollier AG                                                 | Department of Biosystems Science and Engineering, ETH Zürich | Chaoran Chen, Sarah Nadeau, Catharine Aquino, Ivan Topolsky, Philipp Jablonski, Lara Fuhrmann, David Dreifuss, Katharina Jahn, Andrea Cabral de Gouvea, Maria Domenica Moccia, Simon Grüter, Timothy Sykes, Lennart Opitz, Griffin White, Laura Neff, Doris Popovic, Andrea Patrignani, Jay Tracy, Ralph Schlapbach, Christiane Beckmann, Maurice Redondo, Olivier Kobel, Christoph Noppen, Sophie Seidel, Noemie Santamaria de Souza, Niko Beerenwinkel, Tanja Stadler |
| EPI_ISL_1408870                                                                                                                                                                                                                                                                                                                                                                                                                                                                                                                                                                                                                                                                                                                                                                                                                                                                                                                                                                                                                                                                                                                                                                                                                                                                                                                                                                                                                                                                                                                                                                                                                                                                                                                                                                                                                                                                                                                                                                                                                                                                                                                                                                                                                                                                                                                                                                                                                                                                                                                                                                                                                                                                                                                                                                                                                                                                                                                                                                                                                                                                                                                                                                                                                                                                                                                                                                                                                                                                                                                                                                                                                                                                                                                                                                                                                                                                                                                                                                                                                                                                                                                                                                                                                                                                                                                                                                                                                                                                                                                                                                                                                                                                                                                                                                                                                                                                                                                                                                                                                                                                                                                                                                                                                                                                                            | Viollier AG                                                 | Department of Biosystems Science and Engineering, ETH Zürich | Chaoran Chen, Sarah Nadeau, Ivan Topolsky, Emmanouil Dermizakis, Keith Harshman, Ioannis Xenarios, Henri Pegeot, Lorenzo Cerutti, Deborah Penet, Philipp Jablonski, Lara Fuhrmann, David Dreifuss, Katharina Jahn, Christiane Beckmann, Maurice Redondo, Olivier Kobel, Christoph Noppen, Sophie Seidel, Noemie Santamaria de Souza, Niko Beerenwinkel, Tanja Stadler                                                                                                   |
| EPI_ISL_1408871                                                                                                                                                                                                                                                                                                                                                                                                                                                                                                                                                                                                                                                                                                                                                                                                                                                                                                                                                                                                                                                                                                                                                                                                                                                                                                                                                                                                                                                                                                                                                                                                                                                                                                                                                                                                                                                                                                                                                                                                                                                                                                                                                                                                                                                                                                                                                                                                                                                                                                                                                                                                                                                                                                                                                                                                                                                                                                                                                                                                                                                                                                                                                                                                                                                                                                                                                                                                                                                                                                                                                                                                                                                                                                                                                                                                                                                                                                                                                                                                                                                                                                                                                                                                                                                                                                                                                                                                                                                                                                                                                                                                                                                                                                                                                                                                                                                                                                                                                                                                                                                                                                                                                                                                                                                                                            | Viollier AG                                                 | Department of Biosystems Science and Engineering, ETH Zürich | Chaoran Chen, Sarah Nadeau, Catharine Aquino, Ivan Topolsky, Philipp Jablonski, Lara Fuhrmann, David Dreifuss, Katharina Jahn, Andrea Cabral de Gouvea, Maria Domenica Moccia, Simon Grüter, Timothy Sykes, Lennart Opitz, Griffin White, Laura Neff, Doris Popovic, Andrea Patrignani, Jay Tracy, Ralph Schlapbach, Christiane Beckmann, Maurice Redondo, Olivier Kobel, Christoph Noppen, Sophie Seidel, Noemie Santamaria de Souza, Niko Beerenwinkel, Tanja Stadler |
| EPI_ISL_1408872, EPI_ISL_1408875, EPI_ISL_1408876, EPI_ISL_1408877                                                                                                                                                                                                                                                                                                                                                                                                                                                                                                                                                                                                                                                                                                                                                                                                                                                                                                                                                                                                                                                                                                                                                                                                                                                                                                                                                                                                                                                                                                                                                                                                                                                                                                                                                                                                                                                                                                                                                                                                                                                                                                                                                                                                                                                                                                                                                                                                                                                                                                                                                                                                                                                                                                                                                                                                                                                                                                                                                                                                                                                                                                                                                                                                                                                                                                                                                                                                                                                                                                                                                                                                                                                                                                                                                                                                                                                                                                                                                                                                                                                                                                                                                                                                                                                                                                                                                                                                                                                                                                                                                                                                                                                                                                                                                                                                                                                                                                                                                                                                                                                                                                                                                                                                                                         | Viollier AG                                                 | Department of Biosystems Science and Engineering, ETH Zürich | Chaoran Chen, Sarah Nadeau, Ivan Topolsky, Emmanouil Dermizakis, Keith Harshman, Ioannis Xenarios, Henri Pegeot, Lorenzo Cerutti, Deborah Penet, Philipp Jablonski, Lara Fuhrmann, David Dreifuss, Katharina Jahn, Christiane Beckmann, Maurice Redondo, Olivier Kobel, Christoph Noppen, Sophie Seidel, Noemie Santamaria de Souza, Niko Beerenwinkel, Tanja Stadler                                                                                                   |
| EPI_ISL_1408880, EPI_ISL_1408881, EPI_ISL_1408882, EPI_ISL_1408883                                                                                                                                                                                                                                                                                                                                                                                                                                                                                                                                                                                                                                                                                                                                                                                                                                                                                                                                                                                                                                                                                                                                                                                                                                                                                                                                                                                                                                                                                                                                                                                                                                                                                                                                                                                                                                                                                                                                                                                                                                                                                                                                                                                                                                                                                                                                                                                                                                                                                                                                                                                                                                                                                                                                                                                                                                                                                                                                                                                                                                                                                                                                                                                                                                                                                                                                                                                                                                                                                                                                                                                                                                                                                                                                                                                                                                                                                                                                                                                                                                                                                                                                                                                                                                                                                                                                                                                                                                                                                                                                                                                                                                                                                                                                                                                                                                                                                                                                                                                                                                                                                                                                                                                                                                         | Viollier AG                                                 | Department of Biosystems Science and Engineering, ETH Zürich | Chaoran Chen, Sarah Nadeau, Catharine Aquino, Ivan Topolsky, Philipp Jablonski, Lara Fuhrmann, David Dreifuss, Katharina Jahn, Andrea Cabral de Gouvea, Maria Domenica Moccia, Simon Grüter, Timothy Sykes, Lennart Opitz, Griffin White, Laura Neff, Doris Popovic, Andrea Patrignani, Jay Tracy, Ralph Schlapbach, Christiane Beckmann, Maurice Redondo, Olivier Kobel, Christoph Noppen, Sophie Seidel, Noemie Santamaria de Souza, Niko Beerenwinkel, Tanja Stadler |
| EPI_ISL_1408884                                                                                                                                                                                                                                                                                                                                                                                                                                                                                                                                                                                                                                                                                                                                                                                                                                                                                                                                                                                                                                                                                                                                                                                                                                                                                                                                                                                                                                                                                                                                                                                                                                                                                                                                                                                                                                                                                                                                                                                                                                                                                                                                                                                                                                                                                                                                                                                                                                                                                                                                                                                                                                                                                                                                                                                                                                                                                                                                                                                                                                                                                                                                                                                                                                                                                                                                                                                                                                                                                                                                                                                                                                                                                                                                                                                                                                                                                                                                                                                                                                                                                                                                                                                                                                                                                                                                                                                                                                                                                                                                                                                                                                                                                                                                                                                                                                                                                                                                                                                                                                                                                                                                                                                                                                                                                            | Viollier AG                                                 | Department of Biosystems Science and Engineering, ETH Zürich | Chaoran Chen, Sarah Nadeau, Ivan Topolsky, Emmanouil Dermizakis, Keith Harshman, Ioannis Xenarios, Henri Pegeot, Lorenzo Cerutti, Deborah Penet, Philipp Jablonski, Lara Fuhrmann, David Dreifuss, Katharina Jahn, Christiane Beckmann, Maurice Redondo, Olivier Kobel, Christoph Noppen, Sophie Seidel, Noemie Santamaria de Souza, Niko Beerenwinkel, Tanja Stadler                                                                                                   |
| EPI_ISL_1496014, EPI_ISL_1496020, EPI_ISL_1496032, EPI_ISL_1496041, EPI_ISL_1496062, EPI_ISL_1496080, EPI_ISL_1496084, EPI_ISL_1496085, EPI_ISL_1496214, EPI_ISL_1496215, EPI_ISL_1496216, EPI_ISL_1496217, EPI_ISL_1496218, EPI_ISL_1496225, EPI_ISL_1496228, EPI_ISL_1496230, EPI_ISL_1496231, EPI_ISL_1496233, EPI_ISL_1496234, EPI_ISL_1496237, EPI_ISL_1496238, EPI_ISL_1496239, EPI_ISL_1496243, EPI_ISL_1496247, EPI_ISL_1496249, EPI_ISL_1496255, EPI_ISL_1496256, EPI_ISL_1496258, EPI_ISL_1496260, EPI_ISL_1496262, EPI_ISL_1496264, EPI_ISL_1496265, EPI_ISL_1496266, EPI_ISL_1496269, EPI_ISL_1496271, EPI_ISL_1496277, EPI_ISL_1496278, EPI_ISL_1496279, EPI_ISL_1496280, EPI_ISL_1496281, EPI_ISL_1496282, EPI_ISL_1496283, EPI_ISL_1496287, EPI_ISL_1496289, EPI_ISL_1496290, EPI_ISL_1496291, EPI_ISL_1496292, EPI_ISL_1496293, EPI_ISL_1496295, EPI_ISL_1496303, EPI_ISL_1496311, EPI_ISL_1496313, EPI_ISL_1496315, EPI_ISL_1496319, EPI_ISL_1496320, EPI_ISL_1496323, EPI_ISL_1496324, EPI_ISL_1496328, EPI_ISL_1496329, EPI_ISL_1496331, EPI_ISL_1496332, EPI_ISL_1496337, EPI_ISL_1496338, EPI_ISL_1496339, EPI_ISL_1496340, EPI_ISL_1496343, EPI_ISL_1496344, EPI_ISL_1496345, EPI_ISL_1496346, EPI_ISL_1496347, EPI_ISL_1496348, EPI_ISL_1496349, EPI_ISL_1496350, EPI_ISL_1496351, EPI_ISL_1496352, EPI_ISL_1496353, EPI_ISL_1496354, EPI_ISL_1496355, EPI_ISL_1496356, EPI_ISL_1496357, EPI_ISL_1496358, EPI_ISL_1496359, EPI_ISL_1496360, EPI_ISL_1496361, EPI_ISL_1496362, EPI_ISL_1496363, EPI_ISL_1496365, EPI_ISL_1496366, EPI_ISL_1496367, EPI_ISL_1496368, EPI_ISL_1496369, EPI_ISL_1496370, EPI_ISL_1496371, EPI_ISL_1496372, EPI_ISL_1496373, EPI_ISL_1496374, EPI_ISL_1496375, EPI_ISL_1496376, EPI_ISL_1496377, EPI_ISL_1496378, EPI_ISL_1496379, EPI_ISL_1496380, EPI_ISL_1496381, EPI_ISL_1496382, EPI_ISL_1496383, EPI_ISL_1496384, EPI_ISL_1496385, EPI_ISL_1496386, EPI_ISL_1496387, EPI_ISL_1496388, EPI_ISL_1496389, EPI_ISL_1496390, EPI_ISL_1496391, EPI_ISL_1496392, EPI_ISL_1496393, EPI_ISL_1496394, EPI_ISL_1496396, EPI_ISL_1496397, EPI_ISL_1496398, EPI_ISL_1496400, EPI_ISL_1496402, EPI_ISL_1496403, EPI_ISL_1496404, EPI_ISL_1496406, EPI_ISL_1496407, EPI_ISL_1496408, EPI_ISL_1496409, EPI_ISL_1496410, EPI_ISL_1496412, EPI_ISL_1496413, EPI_ISL_1496414, EPI_ISL_1496415, EPI_ISL_1496417, EPI_ISL_1496418, EPI_ISL_1496419, EPI_ISL_1496420, EPI_ISL_1496421, EPI_ISL_1496423, EPI_ISL_1496424, EPI_ISL_1496425, EPI_ISL_1496427, EPI_ISL_1496431, EPI_ISL_1496433, EPI_ISL_1496434, EPI_ISL_1496435, EPI_ISL_1496437, EPI_ISL_1496441, EPI_ISL_1496443, EPI_ISL_1496444, EPI_ISL_1496448, EPI_ISL_1496456, EPI_ISL_1496460, EPI_ISL_1496461, EPI_ISL_1496462, EPI_ISL_1496463, EPI_ISL_1496464, EPI_ISL_1496466, EPI_ISL_1496467, EPI_ISL_1496468, EPI_ISL_1496469, EPI_ISL_1496470, EPI_ISL_1496472, EPI_ISL_1496473, EPI_ISL_1496474, EPI_ISL_1496475, EPI_ISL_1496476, EPI_ISL_1496477, EPI_ISL_1496478, EPI_ISL_1496480, EPI_ISL_1496481, EPI_ISL_1496482, EPI_ISL_1496483, EPI_ISL_1496484, EPI_ISL_1496485, EPI_ISL_1496486, EPI_ISL_1496487, EPI_ISL_1496488, EPI_ISL_1496490, EPI_ISL_1496491, EPI_ISL_1496492, EPI_ISL_1496493, EPI_ISL_1496494, EPI_ISL_1496495, EPI_ISL_1496496, EPI_ISL_1496497, EPI_ISL_1496498, EPI_ISL_1496499, EPI_ISL_1496500, EPI_ISL_1496501, EPI_ISL_1496505, EPI_ISL_1496507, EPI_ISL_1496508, EPI_ISL_1496509, EPI_ISL_1496512, EPI_ISL_1496513, EPI_ISL_1496514, EPI_ISL_1496516, EPI_ISL_1496517, EPI_ISL_1496518, EPI_ISL_1496520, EPI_ISL_1496522, EPI_ISL_1496523, EPI_ISL_1496524, EPI_ISL_1496525, EPI_ISL_1496526, EPI_ISL_1496527, EPI_ISL_1496528, EPI_ISL_1496529, EPI_ISL_1496530, EPI_ISL_1496532, EPI_ISL_1496534, EPI_ISL_1496535, EPI_ISL_1496536, EPI_ISL_1496537, EPI_ISL_1496538, EPI_ISL_1496539, EPI_ISL_1496540, EPI_ISL_1496541, EPI_ISL_1496542, EPI_ISL_1496543, EPI_ISL_1496544, EPI_ISL_1496546, EPI_ISL_1496547, EPI_ISL_1496549, EPI_ISL_1496551, EPI_ISL_1496554, EPI_ISL_1496555, EPI_ISL_1496556, EPI_ISL_1496557, EPI_ISL_1496558, EPI_ISL_1496559, EPI_ISL_1496561, EPI_ISL_1496562, EPI_ISL_1496563, EPI_ISL_1496564, EPI_ISL_1496565, EPI_ISL_1496566, EPI_ISL_1496567, EPI_ISL_1496568, EPI_ISL_1496569, EPI_ISL_1496571, EPI_ISL_1496576, EPI_ISL_1496578, EPI_ISL_1496581, EPI_ISL_1496593, EPI_ISL_1496595, EPI_ISL_1496603, EPI_ISL_1496611, EPI_ISL_1496612, EPI_ISL_1496615, EPI_ISL_1496618, EPI_ISL_1496620, EPI_ISL_1496622, EPI_ISL_1496623, EPI_ISL_1496625, EPI_ISL_1496626, EPI_ISL_1496627, EPI_ISL_1496628, EPI_ISL_1496629, EPI_ISL_1496630, EPI_ISL_1496632, EPI_ISL_1496633, EPI_ISL_1496634, EPI_ISL_1496635, EPI_ISL_1496636, EPI_ISL_1496637, EPI_ISL_1496638, EPI_ISL_1496639, EPI_ISL_1496641, EPI_ISL_1496642, EPI_ISL_1496643, EPI_ISL_1496645, EPI_ISL_1496646, EPI_ISL_1496647, EPI_ISL_1496648, EPI_ISL_1496649, EPI_ISL_1496650, EPI_ISL_1496651, EPI_ISL_1496652, EPI_ISL_1496653, EPI_ISL_1496654, EPI_ISL_1496655, EPI_ISL_1496656, EPI_ISL_1496657, EPI_ISL_1496658, EPI_ISL_1496659, EPI_ISL_1496660, EPI_ISL_1496661, EPI_ISL_1496663, EPI_ISL_1496665, EPI_ISL_1496666, EPI_ISL_1496667, EPI_ISL_1496669, EPI_ISL_1496672, EPI_ISL_1496693, EPI_ISL_1496695, EPI_ISL_1496698, EPI_ISL_1496702, EPI_ISL_1496704, EPI_ISL_1496709 |                                                             |                                                              |                                                                                                                                                                                                                                                                                                                                                                                                                                                                         |
| see above                                                                                                                                                                                                                                                                                                                                                                                                                                                                                                                                                                                                                                                                                                                                                                                                                                                                                                                                                                                                                                                                                                                                                                                                                                                                                                                                                                                                                                                                                                                                                                                                                                                                                                                                                                                                                                                                                                                                                                                                                                                                                                                                                                                                                                                                                                                                                                                                                                                                                                                                                                                                                                                                                                                                                                                                                                                                                                                                                                                                                                                                                                                                                                                                                                                                                                                                                                                                                                                                                                                                                                                                                                                                                                                                                                                                                                                                                                                                                                                                                                                                                                                                                                                                                                                                                                                                                                                                                                                                                                                                                                                                                                                                                                                                                                                                                                                                                                                                                                                                                                                                                                                                                                                                                                                                                                  | Viollier AG                                                 | Department of Biosystems Science and Engineering, ETH Zürich | Christian Beisel, Sarah Nadeau, Chaoran Chen, Ivan Topolsky, Philipp Jablonski, Lara Fuhrmann, David Dreifuss, Katharina Jahn, Rebecca Denes, Mirjam Feldkamp, Ina Nissen, Natascia Santacroce, Elodie Burcklen, Christiane Beckmann, Maurice Redondo, Olivier Kobel, Christoph Noppen, Sophie Seidel, Noemie Santamaria de Souza, Niko Beerenwinkel, Tanja Stadler                                                                                                     |
| EPI_ISL_1598919, EPI_ISL_1599071, EPI_ISL_1599072, EPI_ISL_1599081                                                                                                                                                                                                                                                                                                                                                                                                                                                                                                                                                                                                                                                                                                                                                                                                                                                                                                                                                                                                                                                                                                                                                                                                                                                                                                                                                                                                                                                                                                                                                                                                                                                                                                                                                                                                                                                                                                                                                                                                                                                                                                                                                                                                                                                                                                                                                                                                                                                                                                                                                                                                                                                                                                                                                                                                                                                                                                                                                                                                                                                                                                                                                                                                                                                                                                                                                                                                                                                                                                                                                                                                                                                                                                                                                                                                                                                                                                                                                                                                                                                                                                                                                                                                                                                                                                                                                                                                                                                                                                                                                                                                                                                                                                                                                                                                                                                                                                                                                                                                                                                                                                                                                                                                                                         | Viollier AG                                                 | Department of Biosystems Science and Engineering, ETH Zürich | Chaoran Chen, Sarah Nadeau, Ivan Topolsky, Emmanouil Dermizakis, Keith Harshman, Ioannis Xenarios, Henri Pegeot, Lorenzo Cerutti, Deborah Penet, Philipp Jablonski, Lara Fuhrmann, David Dreifuss, Katharina Jahn, Christiane Beckmann, Maurice Redondo, Olivier Kobel, Christoph Noppen, Sophie Seidel, Noemie Santamaria de Souza, Niko Beerenwinkel, Tanja Stadler                                                                                                   |
| EPI_ISL_1654025, EPI_ISL_1654041, EPI_ISL_1654044, EPI_ISL_1654050, EPI_ISL_1654168, EPI_ISL_1654171, EPI_ISL_1654174, EPI_ISL_1654180, EPI_ISL_1654193, EPI_ISL_1654194, EPI_ISL_1654196, EPI_ISL_1654200                                                                                                                                                                                                                                                                                                                                                                                                                                                                                                                                                                                                                                                                                                                                                                                                                                                                                                                                                                                                                                                                                                                                                                                                                                                                                                                                                                                                                                                                                                                                                                                                                                                                                                                                                                                                                                                                                                                                                                                                                                                                                                                                                                                                                                                                                                                                                                                                                                                                                                                                                                                                                                                                                                                                                                                                                                                                                                                                                                                                                                                                                                                                                                                                                                                                                                                                                                                                                                                                                                                                                                                                                                                                                                                                                                                                                                                                                                                                                                                                                                                                                                                                                                                                                                                                                                                                                                                                                                                                                                                                                                                                                                                                                                                                                                                                                                                                                                                                                                                                                                                                                                 | Viollier AG                                                 | Department of Biosystems Science and Engineering, ETH Zürich | Chaoran Chen, Sarah Nadeau, Catharine Aquino, Ivan Topolsky, Philipp Jablonski, Lara Fuhrmann, David Dreifuss, Katharina Jahn, Andrea Cabral de Gouvea, Maria Domenica Moccia, Simon Grüter, Timothy Sykes, Lennart Opitz, Griffin White, Laura Neff, Doris Popovic, Andrea Patrignani, Jay Tracy, Ralph Schlapbach, Christiane Beckmann, Maurice Redondo, Olivier Kobel, Christoph Noppen, Sophie Seidel, Noemie Santamaria de Souza, Niko Beerenwinkel, Tanja Stadler |
| see above                                                                                                                                                                                                                                                                                                                                                                                                                                                                                                                                                                                                                                                                                                                                                                                                                                                                                                                                                                                                                                                                                                                                                                                                                                                                                                                                                                                                                                                                                                                                                                                                                                                                                                                                                                                                                                                                                                                                                                                                                                                                                                                                                                                                                                                                                                                                                                                                                                                                                                                                                                                                                                                                                                                                                                                                                                                                                                                                                                                                                                                                                                                                                                                                                                                                                                                                                                                                                                                                                                                                                                                                                                                                                                                                                                                                                                                                                                                                                                                                                                                                                                                                                                                                                                                                                                                                                                                                                                                                                                                                                                                                                                                                                                                                                                                                                                                                                                                                                                                                                                                                                                                                                                                                                                                                                                  | Viollier AG                                                 | Department of Biosystems Science and Engineering, ETH Zürich | Chaoran Chen, Sarah Nadeau, Catharine Aquino, Ivan Topolsky, Philipp Jablonski, Lara Fuhrmann, David Dreifuss, Katharina Jahn, Andrea Cabral de Gouvea, Maria Domenica Moccia, Simon Grüter, Timothy Sykes, Lennart Opitz, Griffin White, Laura Neff, Doris Popovic, Andrea Patrignani, Jay Tracy, Ralph Schlapbach, Christiane Beckmann, Maurice Redondo, Olivier Kobel, Christoph Noppen, Sophie Seidel, Noemie Santamaria de Souza, Niko Beerenwinkel, Tanja Stadler |
| EPI_ISL_1669799                                                                                                                                                                                                                                                                                                                                                                                                                                                                                                                                                                                                                                                                                                                                                                                                                                                                                                                                                                                                                                                                                                                                                                                                                                                                                                                                                                                                                                                                                                                                                                                                                                                                                                                                                                                                                                                                                                                                                                                                                                                                                                                                                                                                                                                                                                                                                                                                                                                                                                                                                                                                                                                                                                                                                                                                                                                                                                                                                                                                                                                                                                                                                                                                                                                                                                                                                                                                                                                                                                                                                                                                                                                                                                                                                                                                                                                                                                                                                                                                                                                                                                                                                                                                                                                                                                                                                                                                                                                                                                                                                                                                                                                                                                                                                                                                                                                                                                                                                                                                                                                                                                                                                                                                                                                                                            | Biolytix AG                                                 | Swiss Tropical and Public Health Institute                   | Salome Hosch, Philipp Wagner, Curdin Decurtins, Anna Henger, Ralf Seyfarth, Adrian Härrli, Claudia Daubenberger, Tobias Schindler                                                                                                                                                                                                                                                                                                                                       |
| EPI_ISL_1747590                                                                                                                                                                                                                                                                                                                                                                                                                                                                                                                                                                                                                                                                                                                                                                                                                                                                                                                                                                                                                                                                                                                                                                                                                                                                                                                                                                                                                                                                                                                                                                                                                                                                                                                                                                                                                                                                                                                                                                                                                                                                                                                                                                                                                                                                                                                                                                                                                                                                                                                                                                                                                                                                                                                                                                                                                                                                                                                                                                                                                                                                                                                                                                                                                                                                                                                                                                                                                                                                                                                                                                                                                                                                                                                                                                                                                                                                                                                                                                                                                                                                                                                                                                                                                                                                                                                                                                                                                                                                                                                                                                                                                                                                                                                                                                                                                                                                                                                                                                                                                                                                                                                                                                                                                                                                                            | Clinical Virology                                           | Clinical Bacteriology                                        | Tim Roloff, Madlen Stange, Helena MB Seth-Smith, Alfredo Mari, Karoline Leuzinger, Julia Bielicki, Manuel Battegay, Hans Hirsch, Adrian Egli                                                                                                                                                                                                                                                                                                                            |
| EPI_ISL_1760821, EPI_ISL_1760822, EPI_ISL_1760824, EPI_ISL_1760825, EPI_ISL_1760826, EPI_ISL_1760828, EPI_ISL_1760831, EPI_ISL_1760832, EPI_ISL_1760837, EPI_ISL_1760838, EPI_ISL_1760840, EPI_ISL_1760841, EPI_ISL_1760844, EPI_ISL_1760845, EPI_ISL_1760852, EPI_ISL_1760853, EPI_ISL_1760854, EPI_ISL_1760855, EPI_ISL_1760856, EPI_ISL_1760858, EPI_ISL_1760859, EPI_ISL_1760860, EPI_ISL_1760861, EPI_ISL_1760862, EPI_ISL_1760865, EPI_ISL_1760866, EPI_ISL_1760867, EPI_ISL_1760871, EPI_ISL_1760873, EPI_ISL_1760881, EPI_ISL_1760882, EPI_ISL_1760883, EPI_ISL_1760885, EPI_ISL_1760886, EPI_ISL_1760887, EPI_ISL_1760888, EPI_ISL_1760891, EPI_ISL_1760894, EPI_ISL_1760898, EPI_ISL_1760903, EPI_ISL_1760915, EPI_ISL_1760916, EPI_ISL_1760917, EPI_ISL_1760918, EPI_ISL_1760920, EPI_ISL_1760921, EPI_ISL_1760923, EPI_ISL_1760924, EPI_ISL_1760925, EPI_ISL_1760926, EPI_ISL_1760927, EPI_ISL_1760928, EPI_ISL_1760929, EPI_ISL_1760930, EPI_ISL_1760931, EPI_ISL_1760932, EPI_ISL_1760933, EPI_ISL_1760934, EPI_ISL_1760935, EPI_ISL_1760936, EPI_ISL_1760937, EPI_ISL_1760938, EPI_ISL_1760939, EPI_ISL_1760941, EPI_ISL_1760942, EPI_ISL_1760943, EPI_ISL_1760944, EPI_ISL_1760945, EPI_ISL_1760946, EPI_ISL_1760947, EPI_ISL_1760948, EPI_ISL_1760949, EPI_ISL_1760952, EPI_ISL_1760953, EPI_ISL_1760955, EPI_ISL_1760956, EPI_ISL_1760957, EPI_ISL_1760958, EPI_ISL_1760959, EPI_ISL_1760960, EPI_ISL_1760961, EPI_ISL_1760962, EPI_ISL_1760963, EPI_ISL_1760964, EPI_ISL_1760965, EPI_ISL_1760966, EPI_ISL_1760967, EPI_ISL_1760968, EPI_ISL_1760969, EPI_ISL_1760973, EPI_ISL_1760974, EPI_ISL_1760975, EPI_ISL_1760976, EPI_ISL_1760977, EPI_ISL_1760978, EPI_ISL_1760979, EPI_ISL_1760980, EPI_ISL_1760981, EPI_ISL_1760982, EPI_ISL_1760984, EPI_ISL_1760985, EPI_ISL_1760986, EPI_ISL_1760987, EPI_ISL_1760989, EPI_ISL_1760990, EPI_ISL_1760991, EPI_ISL_1760992, EPI_ISL_1760993, EPI_ISL_1760994, EPI_ISL_1760995, EPI_ISL_1760996, EPI_ISL_1760997, EPI_ISL_1760999, EPI_ISL_1761000, EPI_ISL_1761001, EPI_ISL_1761002, EPI_ISL_1761003, EPI_ISL_1761004, EPI_ISL_1761005, EPI_ISL_1761006, EPI_ISL_1761007, EPI_ISL_1761008, EPI_ISL_1761009, EPI_ISL_1761010, EPI_ISL_1761011, EPI_ISL_1761012, EPI_ISL_1761020, EPI_ISL_1761022, EPI_ISL_1761044, EPI_ISL_1761046, EPI_ISL_1761049, EPI_ISL_1761050, EPI_ISL_1761051, EPI_ISL_1761052, EPI_ISL_1761053, EPI_ISL_1761054, EPI_ISL_1761055, EPI_ISL_1761056, EPI_ISL_1761057, EPI_ISL_1761058, EPI_ISL_1761059, EPI_ISL_1761060, EPI_ISL_1761061, EPI_ISL_1761062, EPI_ISL_1761063, EPI_ISL_1761064, EPI_ISL_1761065, EPI_ISL_1761066, EPI_ISL_1761067, EPI_ISL_1761068, EPI_ISL_1761072, EPI_ISL_1761073, EPI_ISL_1761074, EPI_ISL_1761075, EPI_ISL_1761077, EPI_ISL_1761078, EPI_ISL_1761079, EPI_ISL_1761080, EPI_ISL_1761081, EPI_ISL_1761082, EPI_ISL_1761084, EPI_ISL_1761085, EPI_ISL_1761086, EPI_ISL_1761087, EPI_ISL_1761089, EPI_ISL_1761090, EPI_ISL_1761091, EPI_ISL_1761092, EPI_ISL_1761093, EPI_ISL_1761094, EPI_ISL_1761098, EPI_ISL_1761099, EPI_ISL_1761105, EPI_ISL_1761106, EPI_ISL_1761107, EPI_ISL_1761109, EPI_ISL_1761110, EPI_ISL_1761112, EPI_ISL_1761113, EPI_ISL_1761115, EPI_ISL_1761121                                                                                                                                                                                                                                                                                                                                                                                                                                                                                                                                                                                                                                                                                                                                                                                                                                                                                                                                                                                                                                                                                                                                                                                                                                                                                                                                                                                                                                                                                                                                                                                                                                                                                                                                                                                                                                                                                                                                                                                                                                                                                                        |                                                             |                                                              |                                                                                                                                                                                                                                                                                                                                                                                                                                                                         |
| see above                                                                                                                                                                                                                                                                                                                                                                                                                                                                                                                                                                                                                                                                                                                                                                                                                                                                                                                                                                                                                                                                                                                                                                                                                                                                                                                                                                                                                                                                                                                                                                                                                                                                                                                                                                                                                                                                                                                                                                                                                                                                                                                                                                                                                                                                                                                                                                                                                                                                                                                                                                                                                                                                                                                                                                                                                                                                                                                                                                                                                                                                                                                                                                                                                                                                                                                                                                                                                                                                                                                                                                                                                                                                                                                                                                                                                                                                                                                                                                                                                                                                                                                                                                                                                                                                                                                                                                                                                                                                                                                                                                                                                                                                                                                                                                                                                                                                                                                                                                                                                                                                                                                                                                                                                                                                                                  | Viollier AG                                                 | Department of Biosystems Science and Engineering, ETH Zürich | Chaoran Chen, Sarah Nadeau, Catharine Aquino, Ivan Topolsky, Philipp Jablonski, Lara Fuhrmann, David Dreifuss, Katharina Jahn, Andrea Cabral de Gouvea, Maria Domenica Moccia, Simon Grüter, Timothy Sykes, Lennart Opitz, Griffin White, Laura Neff, Doris Popovic, Andrea Patrignani, Jay Tracy, Ralph Schlapbach, Christiane Beckmann, Maurice Redondo, Olivier Kobel, Christoph Noppen, Sophie Seidel, Noemie Santamaria de Souza, Niko Beerenwinkel, Tanja Stadler |
| EPI_ISL_413019, EPI_ISL_413020                                                                                                                                                                                                                                                                                                                                                                                                                                                                                                                                                                                                                                                                                                                                                                                                                                                                                                                                                                                                                                                                                                                                                                                                                                                                                                                                                                                                                                                                                                                                                                                                                                                                                                                                                                                                                                                                                                                                                                                                                                                                                                                                                                                                                                                                                                                                                                                                                                                                                                                                                                                                                                                                                                                                                                                                                                                                                                                                                                                                                                                                                                                                                                                                                                                                                                                                                                                                                                                                                                                                                                                                                                                                                                                                                                                                                                                                                                                                                                                                                                                                                                                                                                                                                                                                                                                                                                                                                                                                                                                                                                                                                                                                                                                                                                                                                                                                                                                                                                                                                                                                                                                                                                                                                                                                             | Department of Internal Medicine, Triemli Hospital           | Institute of Medical Virology, University of Zurich          | Stefan Schmutz, Maryam Zaheri, Verena Kufner, Patrick Redli, Fiona Steiner, Jon Huder, Riccarda Capaul, Andrea Zbinden, Jürg Böni, Michael Huber, Gerhard Eich, Alexandra Trkola                                                                                                                                                                                                                                                                                        |
| EPI_ISL_413021                                                                                                                                                                                                                                                                                                                                                                                                                                                                                                                                                                                                                                                                                                                                                                                                                                                                                                                                                                                                                                                                                                                                                                                                                                                                                                                                                                                                                                                                                                                                                                                                                                                                                                                                                                                                                                                                                                                                                                                                                                                                                                                                                                                                                                                                                                                                                                                                                                                                                                                                                                                                                                                                                                                                                                                                                                                                                                                                                                                                                                                                                                                                                                                                                                                                                                                                                                                                                                                                                                                                                                                                                                                                                                                                                                                                                                                                                                                                                                                                                                                                                                                                                                                                                                                                                                                                                                                                                                                                                                                                                                                                                                                                                                                                                                                                                                                                                                                                                                                                                                                                                                                                                                                                                                                                                             | Klinik Hirslanden Zurich                                    | Institute of Medical Virology, University of Zurich          | Stefan Schmutz, Maryam Zaheri, Verena Kufner, Gabriela Ziltener, Patrick Redli, Fiona Steiner, Jon Huder, Riccarda Capaul, Andrea Zbinden, Jürg Böni, Michael Huber, Christian Ruef, Alexandra Trkola                                                                                                                                                                                                                                                                   |
| EPI_ISL_413022, EPI_ISL_413023, EPI_ISL_413024                                                                                                                                                                                                                                                                                                                                                                                                                                                                                                                                                                                                                                                                                                                                                                                                                                                                                                                                                                                                                                                                                                                                                                                                                                                                                                                                                                                                                                                                                                                                                                                                                                                                                                                                                                                                                                                                                                                                                                                                                                                                                                                                                                                                                                                                                                                                                                                                                                                                                                                                                                                                                                                                                                                                                                                                                                                                                                                                                                                                                                                                                                                                                                                                                                                                                                                                                                                                                                                                                                                                                                                                                                                                                                                                                                                                                                                                                                                                                                                                                                                                                                                                                                                                                                                                                                                                                                                                                                                                                                                                                                                                                                                                                                                                                                                                                                                                                                                                                                                                                                                                                                                                                                                                                                                             | Division of Infectious Diseases, University Hospital Zurich | Institute of Medical Virology, University of Zurich          | Stefan Schmutz, Maryam Zaheri, Verena Kufner, Gabriela Ziltener, Patrick Redli, Fiona Steiner, Jon Huder, Riccarda Capaul, Andrea Zbinden, Jürg Böni, Michael Huber, Roberto Speck, Alexandra Trkola                                                                                                                                                                                                                                                                    |
| EPI_ISL_413996, EPI_ISL_413997, EPI_ISL_413999, EPI_ISL_414019, EPI_ISL_414020, EPI_ISL_414021, EPI_ISL_414022, EPI_ISL_414023                                                                                                                                                                                                                                                                                                                                                                                                                                                                                                                                                                                                                                                                                                                                                                                                                                                                                                                                                                                                                                                                                                                                                                                                                                                                                                                                                                                                                                                                                                                                                                                                                                                                                                                                                                                                                                                                                                                                                                                                                                                                                                                                                                                                                                                                                                                                                                                                                                                                                                                                                                                                                                                                                                                                                                                                                                                                                                                                                                                                                                                                                                                                                                                                                                                                                                                                                                                                                                                                                                                                                                                                                                                                                                                                                                                                                                                                                                                                                                                                                                                                                                                                                                                                                                                                                                                                                                                                                                                                                                                                                                                                                                                                                                                                                                                                                                                                                                                                                                                                                                                                                                                                                                             | Laboratoire de Virologie, HUG                               | Swiss National Reference Centre for Influenza                | LAUBSCHER Florian et al.                                                                                                                                                                                                                                                                                                                                                                                                                                                |













EPI\_ISL\_860748, EPI\_ISL\_860749, EPI\_ISL\_860750, EPI\_ISL\_860751, EPI\_ISL\_860752, EPI\_ISL\_860753, EPI\_ISL\_860754, EPI\_ISL\_860755, EPI\_ISL\_860756, EPI\_ISL\_860757, EPI\_ISL\_860758, EPI\_ISL\_860759, EPI\_ISL\_860760, EPI\_ISL\_860762, EPI\_ISL\_860763, EPI\_ISL\_860764, EPI\_ISL\_860765, EPI\_ISL\_860766, EPI\_ISL\_860767, EPI\_ISL\_860768, EPI\_ISL\_860769, EPI\_ISL\_860770, EPI\_ISL\_860771, EPI\_ISL\_860772, EPI\_ISL\_860773, EPI\_ISL\_860774, EPI\_ISL\_860775, EPI\_ISL\_860776, EPI\_ISL\_860777, EPI\_ISL\_860778, EPI\_ISL\_860779, EPI\_ISL\_860780, EPI\_ISL\_860781

see above  
EPI\_ISL\_896093, EPI\_ISL\_896107

Swiss National Reference Centre for Influenza

Viollier AG

Swiss National Reference Centre for Influenza

University Hospital Basel, Clinical Bacteriology

Ana Rita Gonçalves Cabecinhas, Samuel Cordey, Florian Laubscher, Christoph Grüning, Laurent Kaiser

Tim Roloff, Madlen Stange, Helena MB Seth-Smith, Alfredo Mari, Karoline Leuzinger, Julia Bielicki, Christiane Beckmann, Manuel Battegay, Hans Hirsch, Adrian Egli

EPI\_ISL\_899515

Viollier AG

Department of Biosystems Science and Engineering, ETH Zürich

Christian Beisel, Sarah Nadeau, Chaoran Chen, Ivan Topolsky, Philipp Jablonski, Lara Fuhrmann, David Dreifuss, Katharina Jahn, Tobias Schär, Ina Nissen, Natascha Santacroce, Elodie Burcklen, Christiane Beckmann, Maurice Redondo, Olivier Kobel, Christoph Noppen, Sophie Seidel, Noemie Santamaría de Souza, Niko Beerenwinkel, Tanja Stadler

EPI\_ISL\_930859, EPI\_ISL\_930860, EPI\_ISL\_930861, EPI\_ISL\_930862, EPI\_ISL\_930863, EPI\_ISL\_930864, EPI\_ISL\_930865, EPI\_ISL\_930866, EPI\_ISL\_930867, EPI\_ISL\_930868, EPI\_ISL\_930869, EPI\_ISL\_930870, EPI\_ISL\_930871, EPI\_ISL\_930872, EPI\_ISL\_930873, EPI\_ISL\_930874, EPI\_ISL\_930875, EPI\_ISL\_930876, EPI\_ISL\_930877, EPI\_ISL\_930878, EPI\_ISL\_930879, EPI\_ISL\_930880, EPI\_ISL\_930881, EPI\_ISL\_930882, EPI\_ISL\_930883, EPI\_ISL\_930884, EPI\_ISL\_930885, EPI\_ISL\_930886, EPI\_ISL\_930887, EPI\_ISL\_930888, EPI\_ISL\_930889, EPI\_ISL\_930890, EPI\_ISL\_930891, EPI\_ISL\_930892, EPI\_ISL\_930893, EPI\_ISL\_930894, EPI\_ISL\_930895, EPI\_ISL\_930896, EPI\_ISL\_930897, EPI\_ISL\_930898, EPI\_ISL\_930899, EPI\_ISL\_930900, EPI\_ISL\_930901, EPI\_ISL\_930902, EPI\_ISL\_930903, EPI\_ISL\_930904, EPI\_ISL\_930905, EPI\_ISL\_930906, EPI\_ISL\_930907, EPI\_ISL\_930908, EPI\_ISL\_930909, EPI\_ISL\_930910, EPI\_ISL\_930911, EPI\_ISL\_930912, EPI\_ISL\_930913, EPI\_ISL\_930914, EPI\_ISL\_930915, EPI\_ISL\_930916, EPI\_ISL\_930917, EPI\_ISL\_930918, EPI\_ISL\_930919, EPI\_ISL\_930920, EPI\_ISL\_930921, EPI\_ISL\_930922, EPI\_ISL\_930923, EPI\_ISL\_930924, EPI\_ISL\_930925, EPI\_ISL\_930926, EPI\_ISL\_930927, EPI\_ISL\_930928, EPI\_ISL\_930929, EPI\_ISL\_930930, EPI\_ISL\_930931, EPI\_ISL\_930932, EPI\_ISL\_930933, EPI\_ISL\_930934, EPI\_ISL\_930935, EPI\_ISL\_930936, EPI\_ISL\_930937, EPI\_ISL\_930938, EPI\_ISL\_930939, EPI\_ISL\_930940, EPI\_ISL\_930941, EPI\_ISL\_930942, EPI\_ISL\_930943, EPI\_ISL\_930944, EPI\_ISL\_930945, EPI\_ISL\_930946, EPI\_ISL\_930947, EPI\_ISL\_930948, EPI\_ISL\_930949, EPI\_ISL\_930950, EPI\_ISL\_930951, EPI\_ISL\_930952, EPI\_ISL\_930953, EPI\_ISL\_930954, EPI\_ISL\_930955, EPI\_ISL\_930956, EPI\_ISL\_930957, EPI\_ISL\_930958, EPI\_ISL\_930959, EPI\_ISL\_930960, EPI\_ISL\_930961, EPI\_ISL\_930962, EPI\_ISL\_930963, EPI\_ISL\_930964, EPI\_ISL\_930965, EPI\_ISL\_930966, EPI\_ISL\_930967, EPI\_ISL\_930968, EPI\_ISL\_930969, EPI\_ISL\_930970, EPI\_ISL\_930971, EPI\_ISL\_930972, EPI\_ISL\_930973, EPI\_ISL\_930974, EPI\_ISL\_930975, EPI\_ISL\_930976, EPI\_ISL\_930977, EPI\_ISL\_930978, EPI\_ISL\_930979, EPI\_ISL\_930980, EPI\_ISL\_930981, EPI\_ISL\_930982, EPI\_ISL\_930983, EPI\_ISL\_930984, EPI\_ISL\_930985, EPI\_ISL\_930986, EPI\_ISL\_930987, EPI\_ISL\_930988, EPI\_ISL\_930989, EPI\_ISL\_930990, EPI\_ISL\_930991, EPI\_ISL\_930992, EPI\_ISL\_930993, EPI\_ISL\_930994, EPI\_ISL\_930995, EPI\_ISL\_930996, EPI\_ISL\_930997, EPI\_ISL\_930998, EPI\_ISL\_930999, EPI\_ISL\_931000, EPI\_ISL\_931001, EPI\_ISL\_931002, EPI\_ISL\_931003, EPI\_ISL\_931004, EPI\_ISL\_931005, EPI\_ISL\_931006, EPI\_ISL\_931007, EPI\_ISL\_931008, EPI\_ISL\_931009, EPI\_ISL\_931010, EPI\_ISL\_931011, EPI\_ISL\_931012, EPI\_ISL\_931013, EPI\_ISL\_931014, EPI\_ISL\_931015, EPI\_ISL\_931016, EPI\_ISL\_931017, EPI\_ISL\_931018, EPI\_ISL\_931019, EPI\_ISL\_931020, EPI\_ISL\_931021, EPI\_ISL\_931022, EPI\_ISL\_931023, EPI\_ISL\_931024, EPI\_ISL\_931025, EPI\_ISL\_931026, EPI\_ISL\_931027, EPI\_ISL\_931028, EPI\_ISL\_931029, EPI\_ISL\_931030, EPI\_ISL\_931031, EPI\_ISL\_931032, EPI\_ISL\_931033, EPI\_ISL\_931034, EPI\_ISL\_931035, EPI\_ISL\_931036, EPI\_ISL\_931037, EPI\_ISL\_931038, EPI\_ISL\_931039, EPI\_ISL\_931040, EPI\_ISL\_931041, EPI\_ISL\_931042, EPI\_ISL\_931043, EPI\_ISL\_931044, EPI\_ISL\_931045, EPI\_ISL\_931046, EPI\_ISL\_931047, EPI\_ISL\_931048, EPI\_ISL\_931049, EPI\_ISL\_931050, EPI\_ISL\_931051, EPI\_ISL\_931052, EPI\_ISL\_931053, EPI\_ISL\_931054, EPI\_ISL\_931055, EPI\_ISL\_931056, EPI\_ISL\_931057, EPI\_ISL\_931058, EPI\_ISL\_931059, EPI\_ISL\_931060, EPI\_ISL\_931061, EPI\_ISL\_931062, EPI\_ISL\_931063, EPI\_ISL\_931064, EPI\_ISL\_931065, EPI\_ISL\_931066, EPI\_ISL\_931067, EPI\_ISL\_931068, EPI\_ISL\_931069, EPI\_ISL\_931070, EPI\_ISL\_931071, EPI\_ISL\_931072, EPI\_ISL\_931073, EPI\_ISL\_931074, EPI\_ISL\_931075, EPI\_ISL\_931076, EPI\_ISL\_931077, EPI\_ISL\_931078, EPI\_ISL\_931079, EPI\_ISL\_931080, EPI\_ISL\_931081, EPI\_ISL\_931082, EPI\_ISL\_931083, EPI\_ISL\_931084, EPI\_ISL\_931085, EPI\_ISL\_931086, EPI\_ISL\_931087, EPI\_ISL\_931088, EPI\_ISL\_931089, EPI\_ISL\_931090, EPI\_ISL\_931091, EPI\_ISL\_931092, EPI\_ISL\_931093, EPI\_ISL\_931094, EPI\_ISL\_931095, EPI\_ISL\_931096, EPI\_ISL\_931097, EPI\_ISL\_931098, EPI\_ISL\_931099, EPI\_ISL\_931100, EPI\_ISL\_931101, EPI\_ISL\_931102, EPI\_ISL\_931103, EPI\_ISL\_931104, EPI\_ISL\_931105, EPI\_ISL\_931106, EPI\_ISL\_931107, EPI\_ISL\_931108, EPI\_ISL\_931109, EPI\_ISL\_931110, EPI\_ISL\_931111, EPI\_ISL\_931112, EPI\_ISL\_931113, EPI\_ISL\_931114, EPI\_ISL\_931115, EPI\_ISL\_931116, EPI\_ISL\_931117, EPI\_ISL\_931118, EPI\_ISL\_931119, EPI\_ISL\_931120, EPI\_ISL\_931121, EPI\_ISL\_931122, EPI\_ISL\_931123, EPI\_ISL\_931124, EPI\_ISL\_931125, EPI\_ISL\_931126, EPI\_ISL\_931127, EPI\_ISL\_931128, EPI\_ISL\_931129, EPI\_ISL\_931130, EPI\_ISL\_931131, EPI\_ISL\_931132, EPI\_ISL\_931133, EPI\_ISL\_931134, EPI\_ISL\_931135, EPI\_ISL\_931136, EPI\_ISL\_931137, EPI\_ISL\_931138, EPI\_ISL\_931139, EPI\_ISL\_931140, EPI\_ISL\_931141, EPI\_ISL\_931142, EPI\_ISL\_931143, EPI\_ISL\_931144, EPI\_ISL\_931145, EPI\_ISL\_931146, EPI\_ISL\_931147, EPI\_ISL\_931148, EPI\_ISL\_931149, EPI\_ISL\_931150, EPI\_ISL\_931151, EPI\_ISL\_931152, EPI\_ISL\_931153, EPI\_ISL\_931154, EPI\_ISL\_931155, EPI\_ISL\_931156, EPI\_ISL\_931157, EPI\_ISL\_931158, EPI\_ISL\_931159, EPI\_ISL\_931160, EPI\_ISL\_931161, EPI\_ISL\_931162, EPI\_ISL\_931163, EPI\_ISL\_931164, EPI\_ISL\_931165, EPI\_ISL\_931166, EPI\_ISL\_931167, EPI\_ISL\_931168, EPI\_ISL\_931169, EPI\_ISL\_931170, EPI\_ISL\_931171, EPI\_ISL\_931172, EPI\_ISL\_931173, EPI\_ISL\_931174, EPI\_ISL\_931175, EPI\_ISL\_931176, EPI\_ISL\_931177, EPI\_ISL\_931178, EPI\_ISL\_931179, EPI\_ISL\_931180, EPI\_ISL\_931181, EPI\_ISL\_931182, EPI\_ISL\_931183, EPI\_ISL\_931184, EPI\_ISL\_931185, EPI\_ISL\_931186, EPI\_ISL\_931187, EPI\_ISL\_931188, EPI\_ISL\_931189, EPI\_ISL\_931190, EPI\_ISL\_931191, EPI\_ISL\_931192, EPI\_ISL\_931193, EPI\_ISL\_931194, EPI\_ISL\_931195, EPI\_ISL\_931196, EPI\_ISL\_931197, EPI\_ISL\_931198, EPI\_ISL\_931199, EPI\_ISL\_931200, EPI\_ISL\_931201, EPI\_ISL\_931202, EPI\_ISL\_931203, EPI\_ISL\_931204, EPI\_ISL\_931205, EPI\_ISL\_931206, EPI\_ISL\_931207, EPI\_ISL\_931208, EPI\_ISL\_931209, EPI\_ISL\_931210, EPI\_ISL\_931211, EPI\_ISL\_931212, EPI\_ISL\_931213, EPI\_ISL\_931214, EPI\_ISL\_931215, EPI\_ISL\_931216, EPI\_ISL\_931217, EPI\_ISL\_931218, EPI\_ISL\_931219, EPI\_ISL\_931220, EPI\_ISL\_931221, EPI\_ISL\_931222, EPI\_ISL\_931223, EPI\_ISL\_931224, EPI\_ISL\_931225, EPI\_ISL\_931226, EPI\_ISL\_931227, EPI\_ISL\_931228, EPI\_ISL\_931229, EPI\_ISL\_931230, EPI\_ISL\_931231, EPI\_ISL\_931232, EPI\_ISL\_931233, EPI\_ISL\_931234, EPI\_ISL\_931235, EPI\_ISL\_931236, EPI\_ISL\_931237, EPI\_ISL\_931238, EPI\_ISL\_931239, EPI\_ISL\_931240, EPI\_ISL\_931241, EPI\_ISL\_931242, EPI\_ISL\_931243, EPI\_ISL\_931244, EPI\_ISL\_931245, EPI\_ISL\_931246, EPI\_ISL\_931247, EPI\_ISL\_931248, EPI\_ISL\_931249, EPI\_ISL\_931250, EPI\_ISL\_931251, EPI\_ISL\_931252, EPI\_ISL\_931253, EPI\_ISL\_931254, EPI\_ISL\_931255, EPI\_ISL\_931256, EPI\_ISL\_931257, EPI\_ISL\_931258, EPI\_ISL\_931259, EPI\_ISL\_931260, EPI\_ISL\_931261, EPI\_ISL\_931262, EPI\_ISL\_931263, EPI\_ISL\_931264, EPI\_ISL\_931265, EPI\_ISL\_931266, EPI\_ISL\_931267, EPI\_ISL\_931268, EPI\_ISL\_931269, EPI\_ISL\_931270, EPI\_ISL\_931271, EPI\_ISL\_931272, EPI\_ISL\_931273, EPI\_ISL\_931274, EPI\_ISL\_931275, EPI\_ISL\_931276, EPI\_ISL\_931277, EPI\_ISL\_931278, EPI\_ISL\_931279, EPI\_ISL\_931280, EPI\_ISL\_931281, EPI\_ISL\_931282, EPI\_ISL\_931283, EPI\_ISL\_931284, EPI\_ISL\_931285, EPI\_ISL\_931286, EPI\_ISL\_931287, EPI\_ISL\_931288, EPI\_ISL\_931289, EPI\_ISL\_931290, EPI\_ISL\_931291, EPI\_ISL\_931292, EPI\_ISL\_931293, EPI\_ISL\_931294, EPI\_ISL\_931295, EPI\_ISL\_931296, EPI\_ISL\_931297, EPI\_ISL\_931298, EPI\_ISL\_931299, EPI\_ISL\_931300, EPI\_ISL\_931301, EPI\_ISL\_931302, EPI\_ISL\_931303, EPI\_ISL\_931304, EPI\_ISL\_931305, EPI\_ISL\_931306, EPI\_ISL\_931307, EPI\_ISL\_931308, EPI\_ISL\_931309, EPI\_ISL\_931310, EPI\_ISL\_931311, EPI\_ISL\_931312, EPI\_ISL\_931313, EPI\_ISL\_931314, EPI\_ISL\_931315, EPI\_ISL\_931316, EPI\_ISL\_931317, EPI\_ISL\_931318, EPI\_ISL\_931319, EPI\_ISL\_931320, EPI\_ISL\_931321, EPI\_ISL\_931322, EPI\_ISL\_931323, EPI\_ISL\_931324, EPI\_ISL\_931325, EPI\_ISL\_931326, EPI\_ISL\_931327, EPI\_ISL\_931328, EPI\_ISL\_931329, EPI\_ISL\_931330, EPI\_ISL\_931331, EPI\_ISL\_931332, EPI\_ISL\_931333, EPI\_ISL\_931334, EPI\_ISL\_931335, EPI\_ISL\_931336, EPI\_ISL\_931337, EPI\_ISL\_931338, EPI\_ISL\_931339, EPI\_ISL\_931340, EPI\_ISL\_931341, EPI\_ISL\_931342, EPI\_ISL\_931343, EPI\_ISL\_931344, EPI\_ISL\_931345, EPI\_ISL\_931346, EPI\_ISL\_931347, EPI\_ISL\_931348, EPI\_ISL\_931349, EPI\_ISL\_931350, EPI\_ISL\_931351, EPI\_ISL\_931352, EPI\_ISL\_931353, EPI\_ISL\_931354, EPI\_ISL\_931355, EPI\_ISL\_931356, EPI\_ISL\_931357, EPI\_ISL\_931358, EPI\_ISL\_931359, EPI\_ISL\_931360, EPI\_ISL\_931361, EPI\_ISL\_931362, EPI\_ISL\_931363, EPI\_ISL\_931364, EPI\_ISL\_931365, EPI\_ISL\_931366, EPI\_ISL\_931367, EPI\_ISL\_931368, EPI\_ISL\_931369, EPI\_ISL\_931370, EPI\_ISL\_931371, EPI\_ISL\_931372, EPI\_ISL\_931373, EPI\_ISL\_931374, EPI\_ISL\_931375, EPI\_ISL\_931376, EPI\_ISL\_931377, EPI\_ISL\_931378, EPI\_ISL\_931379, EPI\_ISL\_931380, EPI\_ISL\_931381, EPI\_ISL\_931382, EPI\_ISL\_931383, EPI\_ISL\_931384, EPI\_ISL\_931385, EPI\_ISL\_931386, EPI\_ISL\_931387, EPI\_ISL\_931388, EPI\_ISL\_931389, EPI\_ISL\_931390, EPI\_ISL\_931395, EPI\_ISL\_931396, EPI\_ISL\_931397, EPI\_ISL\_931398, EPI\_ISL\_931399, EPI\_ISL\_931400, EPI\_ISL\_931401, EPI\_ISL\_931402, EPI\_ISL\_931403, EPI\_ISL\_931404, EPI\_ISL\_931405, EPI\_ISL\_931406, EPI\_ISL\_931407, EPI\_ISL\_931408, EPI\_ISL\_931409, EPI\_ISL\_931410, EPI\_ISL\_931411, EPI\_ISL\_931412, EPI\_ISL\_931413, EPI\_ISL\_931414, EPI\_ISL\_931415, EPI\_ISL\_931416, EPI\_ISL\_931417, EPI\_ISL\_931418, EPI\_ISL\_931419, EPI\_ISL\_931420, EPI\_ISL\_931421, EPI\_ISL\_931422, EPI\_ISL\_931423, EPI\_ISL\_931424, EPI\_ISL\_931425, EPI\_ISL\_931426, EPI\_ISL\_931427, EPI\_ISL\_931428, EPI\_ISL\_931429, EPI\_ISL\_931430, EPI\_ISL\_931431, EPI\_ISL\_931432, EPI\_ISL\_931433, EPI\_ISL\_931434, EPI\_ISL\_931435, EPI\_ISL\_931436, EPI\_ISL\_931437, EPI\_ISL\_931438, EPI\_ISL\_931439, EPI\_ISL\_931440, EPI\_ISL\_931441, EPI\_ISL\_931442, EPI\_ISL\_931443, EPI\_ISL\_931444, EPI\_ISL\_931445, EPI\_ISL\_931446, EPI\_ISL\_931447

see above  
EPI\_ISL\_934405, EPI\_ISL\_934987

University Hospital Basel, Clinical Virology

ADMED Microbiologie

University Hospital Basel, Clinical Bacteriology

Genomics and Transcriptomics, Philip Morris International

Tim Roloff, Madlen Stange, Helena MB Seth-Smith, Alfredo Mari, Karoline Leuzinger, Julia Bielicki, Manuel Battegay, Hans Hirsch, Adrian Egli  
Reto Lienhard, Marie-Lise Tritten, Emmanuel Guedj, Nicolas Sierro, Rémi Dulize, David Bornand, Mehdi Auberson, Maxime Berthouzo, Nikolai Ivanov, Manuel Peitsch

EPI\_ISL\_939660, EPI\_ISL\_939661, EPI\_ISL\_939662, EPI\_ISL\_939663, EPI\_ISL\_939664, EPI\_ISL\_939665, EPI\_ISL\_939666, EPI\_ISL\_939667, EPI\_ISL\_939668, EPI\_ISL\_939669, EPI\_ISL\_939670, EPI\_ISL\_939671, EPI\_ISL\_939672

see above  
EPI\_ISL\_949186, EPI\_ISL\_949189,  
EPI\_ISL\_949190

Division of Infectious Diseases, University Hospital Zürich

University Hospital Basel, Clinical Virology

Institute of Medical Virology, University of Zurich

University Hospital Basel, Clinical Bacteriology

Stefan Schmutz, Maryam Zaheri, Verena Kufner, Annette Audigé, Maria Grünberg, Kevin Steiner, Jon Huder, Cyril Shah, Riccarda Capaul, Guido Bloembergen, Jürg Böni, Michael Huber, Alexandra Trkola  
Tim Roloff, Madlen Stange, Helena MB Seth-Smith, Alfredo Mari, Karoline Leuzinger, Julia Bielicki, Manuel Battegay, Hans Hirsch, Adrian Egli



We gratefully acknowledge the following Authors from the Originating laboratories responsible for obtaining the specimens, as well as the Submitting laboratories where the genome data were generated and shared via GISAID, on which this research is based.

All Submitters of data may be contacted directly via [www.gisaid.org](http://www.gisaid.org)

Authors are sorted alphabetically.

| Accession ID                                                                                                                                                                                                                                                                                                                                                                                                                                                                                                                                                                                                                                                                                                                                                                                                                                                                                                                                                                                                                                                                                                                                                                                                                                                                                                                                                                                                                                                                                                                                                                                                                                                                                                                                                                                                                                                                                                                                                                                                                                                                                                                                                                                                                                                                                                                                                                                                                                                                                                                                                                                                                                                                                                                                                                                                                                                                                                                                                                                                                                                                                                                                                                                                                                                                                                                                                                                                                                                                                                                                                                                                                                                                                                                                                                                                                                                                                                                                                                                                                                                                                                                                                                                                                                                                                                                                                                                                                                                                                                                                                                                                                                                                                                                                                | Originating Laboratory | Submitting Laboratory                                                                                                                  | Authors                                                                                                                                                                                                                                                                                                                                                                                                                                                                  |                                                                                                                                                                                         |
|-------------------------------------------------------------------------------------------------------------------------------------------------------------------------------------------------------------------------------------------------------------------------------------------------------------------------------------------------------------------------------------------------------------------------------------------------------------------------------------------------------------------------------------------------------------------------------------------------------------------------------------------------------------------------------------------------------------------------------------------------------------------------------------------------------------------------------------------------------------------------------------------------------------------------------------------------------------------------------------------------------------------------------------------------------------------------------------------------------------------------------------------------------------------------------------------------------------------------------------------------------------------------------------------------------------------------------------------------------------------------------------------------------------------------------------------------------------------------------------------------------------------------------------------------------------------------------------------------------------------------------------------------------------------------------------------------------------------------------------------------------------------------------------------------------------------------------------------------------------------------------------------------------------------------------------------------------------------------------------------------------------------------------------------------------------------------------------------------------------------------------------------------------------------------------------------------------------------------------------------------------------------------------------------------------------------------------------------------------------------------------------------------------------------------------------------------------------------------------------------------------------------------------------------------------------------------------------------------------------------------------------------------------------------------------------------------------------------------------------------------------------------------------------------------------------------------------------------------------------------------------------------------------------------------------------------------------------------------------------------------------------------------------------------------------------------------------------------------------------------------------------------------------------------------------------------------------------------------------------------------------------------------------------------------------------------------------------------------------------------------------------------------------------------------------------------------------------------------------------------------------------------------------------------------------------------------------------------------------------------------------------------------------------------------------------------------------------------------------------------------------------------------------------------------------------------------------------------------------------------------------------------------------------------------------------------------------------------------------------------------------------------------------------------------------------------------------------------------------------------------------------------------------------------------------------------------------------------------------------------------------------------------------------------------------------------------------------------------------------------------------------------------------------------------------------------------------------------------------------------------------------------------------------------------------------------------------------------------------------------------------------------------------------------------------------------------------------------------------------------------------------|------------------------|----------------------------------------------------------------------------------------------------------------------------------------|--------------------------------------------------------------------------------------------------------------------------------------------------------------------------------------------------------------------------------------------------------------------------------------------------------------------------------------------------------------------------------------------------------------------------------------------------------------------------|-----------------------------------------------------------------------------------------------------------------------------------------------------------------------------------------|
| EPI_ISL_1002357                                                                                                                                                                                                                                                                                                                                                                                                                                                                                                                                                                                                                                                                                                                                                                                                                                                                                                                                                                                                                                                                                                                                                                                                                                                                                                                                                                                                                                                                                                                                                                                                                                                                                                                                                                                                                                                                                                                                                                                                                                                                                                                                                                                                                                                                                                                                                                                                                                                                                                                                                                                                                                                                                                                                                                                                                                                                                                                                                                                                                                                                                                                                                                                                                                                                                                                                                                                                                                                                                                                                                                                                                                                                                                                                                                                                                                                                                                                                                                                                                                                                                                                                                                                                                                                                                                                                                                                                                                                                                                                                                                                                                                                                                                                                             | Viollier AG            | Department of Biosystems Science and Engineering, ETH Zürich                                                                           | Chaoran Chen, Sarah Nadeau, Catharine Aquino, Ivan Topolsky, Philipp Jablonski, Lara Fuhrmann, David Dreifuss, Katharina Jahn, Andreia Cabral de Gouvea, Maria Domenica Moccia, Simon Grüter, Timothy Sykes, Lennart Opitz, Griffin White, Laura Neff, Doris Popovic, Andrea Patrignani, Jay Tracy, Ralph Schlapbach, Christiane Beckmann, Maurice Redondo, Olivier Kobel, Christoph Noppen, Sophie Seidel, Noemie Santamaria de Souza, Niko Beerenwinkel, Tanja Stadler |                                                                                                                                                                                         |
| EPI_ISL_1004707, EPI_ISL_1004708, EPI_ISL_1004709, EPI_ISL_1004710, EPI_ISL_1004711, EPI_ISL_1004712, EPI_ISL_1004713, EPI_ISL_1004714, EPI_ISL_1004715, EPI_ISL_1004716, EPI_ISL_1004717, EPI_ISL_1004718, EPI_ISL_1004719, EPI_ISL_1004720, EPI_ISL_1004721, EPI_ISL_1004722, EPI_ISL_1004723, EPI_ISL_1004724, EPI_ISL_1004725, EPI_ISL_1004726, EPI_ISL_1004727, EPI_ISL_1004728, EPI_ISL_1004729, EPI_ISL_1004730, EPI_ISL_1004731, EPI_ISL_1004732, EPI_ISL_1004733, EPI_ISL_1004734, EPI_ISL_1004735, EPI_ISL_1004736, EPI_ISL_1004737, EPI_ISL_1004738, EPI_ISL_1004739, EPI_ISL_1004740, EPI_ISL_1004741, EPI_ISL_1004742, EPI_ISL_1004743, EPI_ISL_1004744, EPI_ISL_1004745, EPI_ISL_1004746, EPI_ISL_1004747, EPI_ISL_1004748, EPI_ISL_1004749, EPI_ISL_1004750, EPI_ISL_1004751, EPI_ISL_1004752, EPI_ISL_1004753, EPI_ISL_1004754, EPI_ISL_1004755, EPI_ISL_1004756, EPI_ISL_1004757, EPI_ISL_1004758, EPI_ISL_1004759, EPI_ISL_1004760, EPI_ISL_1004761, EPI_ISL_1004762, EPI_ISL_1004763, EPI_ISL_1004764, EPI_ISL_1004765, EPI_ISL_1004766, EPI_ISL_1004767, EPI_ISL_1004768, EPI_ISL_1004769, EPI_ISL_1004770, EPI_ISL_1004771, EPI_ISL_1004772, EPI_ISL_1004773, EPI_ISL_1004774, EPI_ISL_1004775, EPI_ISL_1004776, EPI_ISL_1004777, EPI_ISL_1004778, EPI_ISL_1004779, EPI_ISL_1004780, EPI_ISL_1004781, EPI_ISL_1004782, EPI_ISL_1004783, EPI_ISL_1004784, EPI_ISL_1004785, EPI_ISL_1004786, EPI_ISL_1004787, EPI_ISL_1004788, EPI_ISL_1004789, EPI_ISL_1004790, EPI_ISL_1004791, EPI_ISL_1004792, EPI_ISL_1004793, EPI_ISL_1004794, EPI_ISL_1004795, EPI_ISL_1004796, EPI_ISL_1004797, EPI_ISL_1004798, EPI_ISL_1004799, EPI_ISL_1004800, EPI_ISL_1004801, EPI_ISL_1004802, EPI_ISL_1004803, EPI_ISL_1004804, EPI_ISL_1004805, EPI_ISL_1004806, EPI_ISL_1004807, EPI_ISL_1004808, EPI_ISL_1004809, EPI_ISL_1004810, EPI_ISL_1004811, EPI_ISL_1004812, EPI_ISL_1004813, EPI_ISL_1004814, EPI_ISL_1004815, EPI_ISL_1004816, EPI_ISL_1004817, EPI_ISL_1004818, EPI_ISL_1004819, EPI_ISL_1004820, EPI_ISL_1004821, EPI_ISL_1004822, EPI_ISL_1004823, EPI_ISL_1004824, EPI_ISL_1004825, EPI_ISL_1004826, EPI_ISL_1004827, EPI_ISL_1004828, EPI_ISL_1004829, EPI_ISL_1004830, EPI_ISL_1004831, EPI_ISL_1004832, EPI_ISL_1004833, EPI_ISL_1004834, EPI_ISL_1004835, EPI_ISL_1004836, EPI_ISL_1004837, EPI_ISL_1004838, EPI_ISL_1004839, EPI_ISL_1004840, EPI_ISL_1004841, EPI_ISL_1004842, EPI_ISL_1004843, EPI_ISL_1004844, EPI_ISL_1004845, EPI_ISL_1004846, EPI_ISL_1004847, EPI_ISL_1004848, EPI_ISL_1004849, EPI_ISL_1004850, EPI_ISL_1004851, EPI_ISL_1004852, EPI_ISL_1004853, EPI_ISL_1004854, EPI_ISL_1004855, EPI_ISL_1004856, EPI_ISL_1004857, EPI_ISL_1004858, EPI_ISL_1004859, EPI_ISL_1004860, EPI_ISL_1004861, EPI_ISL_1004862, EPI_ISL_1004863, EPI_ISL_1004864, EPI_ISL_1004865, EPI_ISL_1004866, EPI_ISL_1004867, EPI_ISL_1004868, EPI_ISL_1004869, EPI_ISL_1004870, EPI_ISL_1004871, EPI_ISL_1004872, EPI_ISL_1004873, EPI_ISL_1004874, EPI_ISL_1004875, EPI_ISL_1004876, EPI_ISL_1004877, EPI_ISL_1004878, EPI_ISL_1004879, EPI_ISL_1004880, EPI_ISL_1004881, EPI_ISL_1004882, EPI_ISL_1004883, EPI_ISL_1004884, EPI_ISL_1004885, EPI_ISL_1004886, EPI_ISL_1004887, EPI_ISL_1004888, EPI_ISL_1004889, EPI_ISL_1004890, EPI_ISL_1004891, EPI_ISL_1004892, EPI_ISL_1004893, EPI_ISL_1004894, EPI_ISL_1004895, EPI_ISL_1004896, EPI_ISL_1004897, EPI_ISL_1004898, EPI_ISL_1004899, EPI_ISL_1004900, EPI_ISL_1004901, EPI_ISL_1004902, EPI_ISL_1004903, EPI_ISL_1004904, EPI_ISL_1004905, EPI_ISL_1004906, EPI_ISL_1004907, EPI_ISL_1004908, EPI_ISL_1004909, EPI_ISL_1004910, EPI_ISL_1004911, EPI_ISL_1004912, EPI_ISL_1004913, EPI_ISL_1004914, EPI_ISL_1004915, EPI_ISL_1004916, EPI_ISL_1004917, EPI_ISL_1004918, EPI_ISL_1004919, EPI_ISL_1004920, EPI_ISL_1004921, EPI_ISL_1004922, EPI_ISL_1004923, EPI_ISL_1004924, EPI_ISL_1004925, EPI_ISL_1004926, EPI_ISL_1004927, EPI_ISL_1004928, EPI_ISL_1004929, EPI_ISL_1004930, EPI_ISL_1004931, EPI_ISL_1004932, EPI_ISL_1004933, EPI_ISL_1004934, EPI_ISL_1004935, EPI_ISL_1004936, EPI_ISL_1004937, EPI_ISL_1004938, EPI_ISL_1004939, EPI_ISL_1004940, EPI_ISL_1004941, EPI_ISL_1004942, EPI_ISL_1004943, EPI_ISL_1004944, EPI_ISL_1004945, EPI_ISL_1004946, EPI_ISL_1004947, EPI_ISL_1004948, EPI_ISL_1004949, EPI_ISL_1004950, EPI_ISL_1004951, EPI_ISL_1004952, EPI_ISL_1004953, EPI_ISL_1004954, EPI_ISL_1004955, EPI_ISL_1004956, EPI_ISL_1004957, EPI_ISL_1004958, EPI_ISL_1004959, EPI_ISL_1004960, EPI_ISL_1004961, EPI_ISL_1004962, EPI_ISL_1004963, EPI_ISL_1004964, EPI_ISL_1004965, EPI_ISL_1004966, EPI_ISL_1004967, EPI_ISL_1004968, EPI_ISL_1004969, EPI_ISL_1004970, EPI_ISL_1004971, EPI_ISL_1004972, EPI_ISL_1004973, EPI_ISL_1004974, EPI_ISL_1004975 |                        |                                                                                                                                        |                                                                                                                                                                                                                                                                                                                                                                                                                                                                          |                                                                                                                                                                                         |
| see above                                                                                                                                                                                                                                                                                                                                                                                                                                                                                                                                                                                                                                                                                                                                                                                                                                                                                                                                                                                                                                                                                                                                                                                                                                                                                                                                                                                                                                                                                                                                                                                                                                                                                                                                                                                                                                                                                                                                                                                                                                                                                                                                                                                                                                                                                                                                                                                                                                                                                                                                                                                                                                                                                                                                                                                                                                                                                                                                                                                                                                                                                                                                                                                                                                                                                                                                                                                                                                                                                                                                                                                                                                                                                                                                                                                                                                                                                                                                                                                                                                                                                                                                                                                                                                                                                                                                                                                                                                                                                                                                                                                                                                                                                                                                                   | Viollier AG            | Department of Biosystems Science and Engineering, ETH Zürich                                                                           | Chaoran Chen, Sarah Nadeau, Ivan Topolsky, Emmanouil Dermizakis, Keith Harshman, Ioannis Xenarios, Henri Pegeot, Lorenzo Cerutti, Deborah Penet, Philipp Jablonski, Lara Fuhrmann, David Dreifuss, Katharina Jahn, Christiane Beckmann, Maurice Redondo, Olivier Kobel, Christoph Noppen, Sophie Seidel, Noemie Santamaria de Souza, Niko Beerenwinkel, Tanja Stadler                                                                                                    |                                                                                                                                                                                         |
| EPI_ISL_1007614                                                                                                                                                                                                                                                                                                                                                                                                                                                                                                                                                                                                                                                                                                                                                                                                                                                                                                                                                                                                                                                                                                                                                                                                                                                                                                                                                                                                                                                                                                                                                                                                                                                                                                                                                                                                                                                                                                                                                                                                                                                                                                                                                                                                                                                                                                                                                                                                                                                                                                                                                                                                                                                                                                                                                                                                                                                                                                                                                                                                                                                                                                                                                                                                                                                                                                                                                                                                                                                                                                                                                                                                                                                                                                                                                                                                                                                                                                                                                                                                                                                                                                                                                                                                                                                                                                                                                                                                                                                                                                                                                                                                                                                                                                                                             | CHUV                   | Laboratory of genomics and metagenomics, Institute of Microbiology, University Hospital Centre and University of Lausanne, Switzerland | Trestan Pillonel, Damien Jacot, Sébastien Aeby, Gilbert Greub, Claire Bertelli                                                                                                                                                                                                                                                                                                                                                                                           |                                                                                                                                                                                         |
| EPI_ISL_1036058, EPI_ISL_1036059, EPI_ISL_1036060, EPI_ISL_1036061, EPI_ISL_1036062, EPI_ISL_1036063, EPI_ISL_1036064, EPI_ISL_1036065, EPI_ISL_1036066, EPI_ISL_1036067, EPI_ISL_1036068, EPI_ISL_1036069, EPI_ISL_1036070, EPI_ISL_1036071, EPI_ISL_1036072, EPI_ISL_1036073, EPI_ISL_1036074, EPI_ISL_1036075, EPI_ISL_1036076, EPI_ISL_1036077, EPI_ISL_1036078, EPI_ISL_1036079, EPI_ISL_1036080, EPI_ISL_1036081, EPI_ISL_1036082, EPI_ISL_1036083, EPI_ISL_1036084, EPI_ISL_1036085, EPI_ISL_1036086, EPI_ISL_1036087, EPI_ISL_1036088, EPI_ISL_1036089, EPI_ISL_1036090, EPI_ISL_1036091, EPI_ISL_1036092, EPI_ISL_1036093, EPI_ISL_1036094, EPI_ISL_1036095, EPI_ISL_1036096, EPI_ISL_1036097, EPI_ISL_1036098, EPI_ISL_1036099, EPI_ISL_1036100, EPI_ISL_1036101, EPI_ISL_1036102, EPI_ISL_1036103, EPI_ISL_1036104, EPI_ISL_1036105, EPI_ISL_1036106, EPI_ISL_1036107, EPI_ISL_1036108, EPI_ISL_1036109, EPI_ISL_1036110, EPI_ISL_1036111, EPI_ISL_1036112, EPI_ISL_1036113, EPI_ISL_1036114, EPI_ISL_1036115, EPI_ISL_1036117, EPI_ISL_1036118, EPI_ISL_1036119, EPI_ISL_1036120, EPI_ISL_1036121, EPI_ISL_1036122, EPI_ISL_1036123, EPI_ISL_1036124, EPI_ISL_1036125, EPI_ISL_1036128, EPI_ISL_1036129, EPI_ISL_1036131, EPI_ISL_1036132, EPI_ISL_1036133, EPI_ISL_1036134, EPI_ISL_1036136, EPI_ISL_1036138, EPI_ISL_1036139                                                                                                                                                                                                                                                                                                                                                                                                                                                                                                                                                                                                                                                                                                                                                                                                                                                                                                                                                                                                                                                                                                                                                                                                                                                                                                                                                                                                                                                                                                                                                                                                                                                                                                                                                                                                                                                                                                                                                                                                                                                                                                                                                                                                                                                                                                                                                                                                                                                                                                                                                                                                                                                                                                                                                                                                                                                                                                                                                                                                                                                                                                                                                                                                                                                                                                                                                                                                                  | see above              | Labormedizinisches Zentrum Dr Risch                                                                                                    | University Hospital Basel, Clinical Bacteriology                                                                                                                                                                                                                                                                                                                                                                                                                         | Tim Roloff, Madlen Stange, Helena MB Seth-Smith, Alfredo Mari, Karoline Leuzinger, Julia Bielicki, Nadia Wohlwend, Martin Risch, Lorenz Risch, Manuel Bategay, Hans Hirsch, Adrian Egli |
| EPI_ISL_1120821, EPI_ISL_1120822, EPI_ISL_1120823                                                                                                                                                                                                                                                                                                                                                                                                                                                                                                                                                                                                                                                                                                                                                                                                                                                                                                                                                                                                                                                                                                                                                                                                                                                                                                                                                                                                                                                                                                                                                                                                                                                                                                                                                                                                                                                                                                                                                                                                                                                                                                                                                                                                                                                                                                                                                                                                                                                                                                                                                                                                                                                                                                                                                                                                                                                                                                                                                                                                                                                                                                                                                                                                                                                                                                                                                                                                                                                                                                                                                                                                                                                                                                                                                                                                                                                                                                                                                                                                                                                                                                                                                                                                                                                                                                                                                                                                                                                                                                                                                                                                                                                                                                           | ICH-SION               | Laboratory of genomics and metagenomics, Institute of Microbiology, University Hospital Centre and University of Lausanne, Switzerland | Trestan Pillonel, Damien Jacot, Sébastien Aeby, Gilbert Greub, Claire Bertelli                                                                                                                                                                                                                                                                                                                                                                                           |                                                                                                                                                                                         |
| EPI_ISL_1120824                                                                                                                                                                                                                                                                                                                                                                                                                                                                                                                                                                                                                                                                                                                                                                                                                                                                                                                                                                                                                                                                                                                                                                                                                                                                                                                                                                                                                                                                                                                                                                                                                                                                                                                                                                                                                                                                                                                                                                                                                                                                                                                                                                                                                                                                                                                                                                                                                                                                                                                                                                                                                                                                                                                                                                                                                                                                                                                                                                                                                                                                                                                                                                                                                                                                                                                                                                                                                                                                                                                                                                                                                                                                                                                                                                                                                                                                                                                                                                                                                                                                                                                                                                                                                                                                                                                                                                                                                                                                                                                                                                                                                                                                                                                                             | CHUV                   | Laboratory of genomics and metagenomics, Institute of Microbiology, University Hospital Centre and University of Lausanne, Switzerland | Trestan Pillonel, Damien Jacot, Sébastien Aeby, Gilbert Greub, Claire Bertelli                                                                                                                                                                                                                                                                                                                                                                                           |                                                                                                                                                                                         |
| EPI_ISL_1120826                                                                                                                                                                                                                                                                                                                                                                                                                                                                                                                                                                                                                                                                                                                                                                                                                                                                                                                                                                                                                                                                                                                                                                                                                                                                                                                                                                                                                                                                                                                                                                                                                                                                                                                                                                                                                                                                                                                                                                                                                                                                                                                                                                                                                                                                                                                                                                                                                                                                                                                                                                                                                                                                                                                                                                                                                                                                                                                                                                                                                                                                                                                                                                                                                                                                                                                                                                                                                                                                                                                                                                                                                                                                                                                                                                                                                                                                                                                                                                                                                                                                                                                                                                                                                                                                                                                                                                                                                                                                                                                                                                                                                                                                                                                                             | VIDYMED EPALINGES      | Laboratory of genomics and metagenomics, Institute of Microbiology, University Hospital Centre and University of Lausanne, Switzerland | Trestan Pillonel, Damien Jacot, Sébastien Aeby, Gilbert Greub, Claire Bertelli                                                                                                                                                                                                                                                                                                                                                                                           |                                                                                                                                                                                         |
| EPI_ISL_1120828, EPI_ISL_1120829, EPI_ISL_1120830                                                                                                                                                                                                                                                                                                                                                                                                                                                                                                                                                                                                                                                                                                                                                                                                                                                                                                                                                                                                                                                                                                                                                                                                                                                                                                                                                                                                                                                                                                                                                                                                                                                                                                                                                                                                                                                                                                                                                                                                                                                                                                                                                                                                                                                                                                                                                                                                                                                                                                                                                                                                                                                                                                                                                                                                                                                                                                                                                                                                                                                                                                                                                                                                                                                                                                                                                                                                                                                                                                                                                                                                                                                                                                                                                                                                                                                                                                                                                                                                                                                                                                                                                                                                                                                                                                                                                                                                                                                                                                                                                                                                                                                                                                           | ICH-SION               | Laboratory of genomics and metagenomics, Institute of Microbiology, University Hospital Centre and University of Lausanne, Switzerland | Trestan Pillonel, Damien Jacot, Sébastien Aeby, Gilbert Greub, Claire Bertelli                                                                                                                                                                                                                                                                                                                                                                                           |                                                                                                                                                                                         |
| EPI_ISL_1120831, EPI_ISL_1120832, EPI_ISL_1120833                                                                                                                                                                                                                                                                                                                                                                                                                                                                                                                                                                                                                                                                                                                                                                                                                                                                                                                                                                                                                                                                                                                                                                                                                                                                                                                                                                                                                                                                                                                                                                                                                                                                                                                                                                                                                                                                                                                                                                                                                                                                                                                                                                                                                                                                                                                                                                                                                                                                                                                                                                                                                                                                                                                                                                                                                                                                                                                                                                                                                                                                                                                                                                                                                                                                                                                                                                                                                                                                                                                                                                                                                                                                                                                                                                                                                                                                                                                                                                                                                                                                                                                                                                                                                                                                                                                                                                                                                                                                                                                                                                                                                                                                                                           | CHUV                   | Laboratory of genomics and metagenomics, Institute of Microbiology, University Hospital Centre and University of Lausanne, Switzerland | Trestan Pillonel, Damien Jacot, Sébastien Aeby, Gilbert Greub, Claire Bertelli                                                                                                                                                                                                                                                                                                                                                                                           |                                                                                                                                                                                         |
| EPI_ISL_1129280                                                                                                                                                                                                                                                                                                                                                                                                                                                                                                                                                                                                                                                                                                                                                                                                                                                                                                                                                                                                                                                                                                                                                                                                                                                                                                                                                                                                                                                                                                                                                                                                                                                                                                                                                                                                                                                                                                                                                                                                                                                                                                                                                                                                                                                                                                                                                                                                                                                                                                                                                                                                                                                                                                                                                                                                                                                                                                                                                                                                                                                                                                                                                                                                                                                                                                                                                                                                                                                                                                                                                                                                                                                                                                                                                                                                                                                                                                                                                                                                                                                                                                                                                                                                                                                                                                                                                                                                                                                                                                                                                                                                                                                                                                                                             | Viollier AG            | Department of Biosystems Science and Engineering, ETH Zürich                                                                           | Christian Beisel, Sarah Nadeau, Chaoran Chen, Ivan Topolsky, Philipp Jablonski, Lara Fuhrmann, David Dreifuss, Katharina Jahn, Rebecca Denes, Mirjam Feldkamp, Ina Nissen, Natascha Santacroce, Elodie Burcklen, Christiane Beckmann, Maurice Redondo, Olivier Kobel, Christoph Noppen, Sophie Seidel, Noemie Santamaria de Souza, Niko Beerenwinkel, Tanja Stadler                                                                                                      |                                                                                                                                                                                         |
| EPI_ISL_1129285, EPI_ISL_1129292, EPI_ISL_1129300, EPI_ISL_1129308, EPI_ISL_1129319, EPI_ISL_1129322, EPI_ISL_1129328, EPI_ISL_1129330, EPI_ISL_1129333, EPI_ISL_1129335                                                                                                                                                                                                                                                                                                                                                                                                                                                                                                                                                                                                                                                                                                                                                                                                                                                                                                                                                                                                                                                                                                                                                                                                                                                                                                                                                                                                                                                                                                                                                                                                                                                                                                                                                                                                                                                                                                                                                                                                                                                                                                                                                                                                                                                                                                                                                                                                                                                                                                                                                                                                                                                                                                                                                                                                                                                                                                                                                                                                                                                                                                                                                                                                                                                                                                                                                                                                                                                                                                                                                                                                                                                                                                                                                                                                                                                                                                                                                                                                                                                                                                                                                                                                                                                                                                                                                                                                                                                                                                                                                                                    | Viollier AG            | Department of Biosystems Science and Engineering, ETH Zürich                                                                           | Chaoran Chen, Sarah Nadeau, Catharine Aquino, Ivan Topolsky, Philipp Jablonski, Lara Fuhrmann, David Dreifuss, Katharina Jahn, Andreia Cabral de Gouvea, Maria Domenica Moccia, Simon Grüter, Timothy Sykes, Lennart Opitz, Griffin White, Laura Neff, Doris Popovic, Andrea Patrignani, Jay Tracy, Ralph Schlapbach, Christiane Beckmann, Maurice Redondo, Olivier Kobel, Christoph Noppen, Sophie Seidel, Noemie Santamaria de Souza, Niko Beerenwinkel, Tanja Stadler |                                                                                                                                                                                         |
| EPI_ISL_1129345                                                                                                                                                                                                                                                                                                                                                                                                                                                                                                                                                                                                                                                                                                                                                                                                                                                                                                                                                                                                                                                                                                                                                                                                                                                                                                                                                                                                                                                                                                                                                                                                                                                                                                                                                                                                                                                                                                                                                                                                                                                                                                                                                                                                                                                                                                                                                                                                                                                                                                                                                                                                                                                                                                                                                                                                                                                                                                                                                                                                                                                                                                                                                                                                                                                                                                                                                                                                                                                                                                                                                                                                                                                                                                                                                                                                                                                                                                                                                                                                                                                                                                                                                                                                                                                                                                                                                                                                                                                                                                                                                                                                                                                                                                                                             | Viollier AG            | Department of Biosystems Science and Engineering, ETH Zürich                                                                           | Christian Beisel, Sarah Nadeau, Chaoran Chen, Ivan Topolsky, Philipp Jablonski, Lara Fuhrmann, David Dreifuss, Katharina Jahn, Rebecca Denes, Mirjam Feldkamp, Ina Nissen, Natascha Santacroce, Elodie Burcklen, Christiane Beckmann, Maurice Redondo, Olivier Kobel, Christoph Noppen, Sophie Seidel, Noemie Santamaria de Souza, Niko Beerenwinkel, Tanja Stadler                                                                                                      |                                                                                                                                                                                         |
| EPI_ISL_1129348, EPI_ISL_1129356, EPI_ISL_1129360, EPI_ISL_1129366                                                                                                                                                                                                                                                                                                                                                                                                                                                                                                                                                                                                                                                                                                                                                                                                                                                                                                                                                                                                                                                                                                                                                                                                                                                                                                                                                                                                                                                                                                                                                                                                                                                                                                                                                                                                                                                                                                                                                                                                                                                                                                                                                                                                                                                                                                                                                                                                                                                                                                                                                                                                                                                                                                                                                                                                                                                                                                                                                                                                                                                                                                                                                                                                                                                                                                                                                                                                                                                                                                                                                                                                                                                                                                                                                                                                                                                                                                                                                                                                                                                                                                                                                                                                                                                                                                                                                                                                                                                                                                                                                                                                                                                                                          | Viollier AG            | Department of Biosystems Science and Engineering, ETH Zürich                                                                           | Chaoran Chen, Sarah Nadeau, Catharine Aquino, Ivan Topolsky, Philipp Jablonski, Lara Fuhrmann, David Dreifuss, Katharina Jahn, Andreia Cabral de Gouvea, Maria Domenica Moccia, Simon Grüter, Timothy Sykes, Lennart Opitz, Griffin White, Laura Neff, Doris Popovic, Andrea Patrignani, Jay Tracy, Ralph Schlapbach, Christiane Beckmann, Maurice Redondo, Olivier Kobel, Christoph Noppen, Sophie Seidel, Noemie Santamaria de Souza, Niko Beerenwinkel, Tanja Stadler |                                                                                                                                                                                         |
| EPI_ISL_1129368                                                                                                                                                                                                                                                                                                                                                                                                                                                                                                                                                                                                                                                                                                                                                                                                                                                                                                                                                                                                                                                                                                                                                                                                                                                                                                                                                                                                                                                                                                                                                                                                                                                                                                                                                                                                                                                                                                                                                                                                                                                                                                                                                                                                                                                                                                                                                                                                                                                                                                                                                                                                                                                                                                                                                                                                                                                                                                                                                                                                                                                                                                                                                                                                                                                                                                                                                                                                                                                                                                                                                                                                                                                                                                                                                                                                                                                                                                                                                                                                                                                                                                                                                                                                                                                                                                                                                                                                                                                                                                                                                                                                                                                                                                                                             | Viollier AG            | Department of Biosystems Science and Engineering, ETH Zürich                                                                           | Chaoran Chen, Sarah Nadeau, Ivan Topolsky, Emmanouil Dermizakis, Keith Harshman, Ioannis Xenarios, Henri Pegeot, Lorenzo Cerutti, Deborah Penet, Philipp Jablonski, Lara Fuhrmann, David Dreifuss, Katharina Jahn, Christiane Beckmann, Maurice Redondo, Olivier Kobel, Christoph Noppen, Sophie Seidel, Noemie Santamaria de Souza, Niko Beerenwinkel, Tanja Stadler                                                                                                    |                                                                                                                                                                                         |
| EPI_ISL_1129370                                                                                                                                                                                                                                                                                                                                                                                                                                                                                                                                                                                                                                                                                                                                                                                                                                                                                                                                                                                                                                                                                                                                                                                                                                                                                                                                                                                                                                                                                                                                                                                                                                                                                                                                                                                                                                                                                                                                                                                                                                                                                                                                                                                                                                                                                                                                                                                                                                                                                                                                                                                                                                                                                                                                                                                                                                                                                                                                                                                                                                                                                                                                                                                                                                                                                                                                                                                                                                                                                                                                                                                                                                                                                                                                                                                                                                                                                                                                                                                                                                                                                                                                                                                                                                                                                                                                                                                                                                                                                                                                                                                                                                                                                                                                             | Viollier AG            | Department of Biosystems Science and Engineering, ETH Zürich                                                                           | Chaoran Chen, Sarah Nadeau, Catharine Aquino, Ivan Topolsky, Philipp Jablonski, Lara Fuhrmann, David Dreifuss, Katharina Jahn, Andreia Cabral de                                                                                                                                                                                                                                                                                                                         |                                                                                                                                                                                         |





















|                                                                                                                                                                                                                                                                                                                                                                                                                                                                                                                                                                                                                                                                                                                                                                                                                                                                                                                                                                                                                                                                                                                                                                                                                                                                                                                                                                                                                                                                                                                                                                                                                                                                                                                                                                                                                                                                                                                                                                                                                                                                                                                                                                                                                                                                                                                                                                                                                                                                                                                                                                                                                                                                                                                                                                                                                                                                                                                                                                                                                                                                                                                                                                                                                                                                                                                                                                                                                                                                                                                                                                                                                                                                                                                                                                                                                                                                                                                                                                                                                                                                                                                                                                                                                                                                                                                                                                                                                                                                                                                                                                                                                                                                                                                                                                                                                                                                                                                                                                                                                                                                                                                                                                                                                                                                                                                                                                                                                                                                                                                                                                                                                                                                                                                                                                                                                                                                                                                                                                                                                                                                                                                                                                                              |             |                                                              |                                                                                                                                                                                                                                                                                                                                                                                                                                                                         |                                                                                                                                                                                                                                                                                                                                                                                                                                                                         |
|----------------------------------------------------------------------------------------------------------------------------------------------------------------------------------------------------------------------------------------------------------------------------------------------------------------------------------------------------------------------------------------------------------------------------------------------------------------------------------------------------------------------------------------------------------------------------------------------------------------------------------------------------------------------------------------------------------------------------------------------------------------------------------------------------------------------------------------------------------------------------------------------------------------------------------------------------------------------------------------------------------------------------------------------------------------------------------------------------------------------------------------------------------------------------------------------------------------------------------------------------------------------------------------------------------------------------------------------------------------------------------------------------------------------------------------------------------------------------------------------------------------------------------------------------------------------------------------------------------------------------------------------------------------------------------------------------------------------------------------------------------------------------------------------------------------------------------------------------------------------------------------------------------------------------------------------------------------------------------------------------------------------------------------------------------------------------------------------------------------------------------------------------------------------------------------------------------------------------------------------------------------------------------------------------------------------------------------------------------------------------------------------------------------------------------------------------------------------------------------------------------------------------------------------------------------------------------------------------------------------------------------------------------------------------------------------------------------------------------------------------------------------------------------------------------------------------------------------------------------------------------------------------------------------------------------------------------------------------------------------------------------------------------------------------------------------------------------------------------------------------------------------------------------------------------------------------------------------------------------------------------------------------------------------------------------------------------------------------------------------------------------------------------------------------------------------------------------------------------------------------------------------------------------------------------------------------------------------------------------------------------------------------------------------------------------------------------------------------------------------------------------------------------------------------------------------------------------------------------------------------------------------------------------------------------------------------------------------------------------------------------------------------------------------------------------------------------------------------------------------------------------------------------------------------------------------------------------------------------------------------------------------------------------------------------------------------------------------------------------------------------------------------------------------------------------------------------------------------------------------------------------------------------------------------------------------------------------------------------------------------------------------------------------------------------------------------------------------------------------------------------------------------------------------------------------------------------------------------------------------------------------------------------------------------------------------------------------------------------------------------------------------------------------------------------------------------------------------------------------------------------------------------------------------------------------------------------------------------------------------------------------------------------------------------------------------------------------------------------------------------------------------------------------------------------------------------------------------------------------------------------------------------------------------------------------------------------------------------------------------------------------------------------------------------------------------------------------------------------------------------------------------------------------------------------------------------------------------------------------------------------------------------------------------------------------------------------------------------------------------------------------------------------------------------------------------------------------------------------------------------------------------------------------------------------------------|-------------|--------------------------------------------------------------|-------------------------------------------------------------------------------------------------------------------------------------------------------------------------------------------------------------------------------------------------------------------------------------------------------------------------------------------------------------------------------------------------------------------------------------------------------------------------|-------------------------------------------------------------------------------------------------------------------------------------------------------------------------------------------------------------------------------------------------------------------------------------------------------------------------------------------------------------------------------------------------------------------------------------------------------------------------|
| EPI_ISL_1260522, EPI_ISL_1260523, EPI_ISL_1260525, EPI_ISL_1260526, EPI_ISL_1260528, EPI_ISL_1260531                                                                                                                                                                                                                                                                                                                                                                                                                                                                                                                                                                                                                                                                                                                                                                                                                                                                                                                                                                                                                                                                                                                                                                                                                                                                                                                                                                                                                                                                                                                                                                                                                                                                                                                                                                                                                                                                                                                                                                                                                                                                                                                                                                                                                                                                                                                                                                                                                                                                                                                                                                                                                                                                                                                                                                                                                                                                                                                                                                                                                                                                                                                                                                                                                                                                                                                                                                                                                                                                                                                                                                                                                                                                                                                                                                                                                                                                                                                                                                                                                                                                                                                                                                                                                                                                                                                                                                                                                                                                                                                                                                                                                                                                                                                                                                                                                                                                                                                                                                                                                                                                                                                                                                                                                                                                                                                                                                                                                                                                                                                                                                                                                                                                                                                                                                                                                                                                                                                                                                                                                                                                                         | Viollier AG | Department of Biosystems Science and Engineering, ETH Zürich | Chaoran Chen, Sarah Nadeau, Catharine Aquino, Ivan Topolsky, Philipp Jablonski, Lara Fuhrmann, David Dreifuss, Katharina Jahn, Andrea Cabral de Gouvea, Maria Domenica Moccia, Simon Grüter, Timothy Sykes, Lennart Opitz, Griffin White, Laura Neff, Doris Popovic, Andrea Patrignani, Jay Tracy, Ralph Schlapbach, Christiane Beckmann, Maurice Redondo, Olivier Kobel, Christoph Noppen, Sophie Seidel, Noemie Santamaria de Souza, Niko Beerenwinkel, Tanja Stadler |                                                                                                                                                                                                                                                                                                                                                                                                                                                                         |
| EPI_ISL_1260534, EPI_ISL_1260536                                                                                                                                                                                                                                                                                                                                                                                                                                                                                                                                                                                                                                                                                                                                                                                                                                                                                                                                                                                                                                                                                                                                                                                                                                                                                                                                                                                                                                                                                                                                                                                                                                                                                                                                                                                                                                                                                                                                                                                                                                                                                                                                                                                                                                                                                                                                                                                                                                                                                                                                                                                                                                                                                                                                                                                                                                                                                                                                                                                                                                                                                                                                                                                                                                                                                                                                                                                                                                                                                                                                                                                                                                                                                                                                                                                                                                                                                                                                                                                                                                                                                                                                                                                                                                                                                                                                                                                                                                                                                                                                                                                                                                                                                                                                                                                                                                                                                                                                                                                                                                                                                                                                                                                                                                                                                                                                                                                                                                                                                                                                                                                                                                                                                                                                                                                                                                                                                                                                                                                                                                                                                                                                                             | Viollier AG | Department of Biosystems Science and Engineering, ETH Zürich | Chaoran Chen, Sarah Nadeau, Ivan Topolsky, Emmanouil Dermitzakis, Keith Harshman, Ioannis Xenarios, Henri Pegeot, Lorenzo Cerutti, Deborah Penet, Philipp Jablonski, Lara Fuhrmann, David Dreifuss, Katharina Jahn, Christiane Beckmann, Maurice Redondo, Olivier Kobel, Christoph Noppen, Sophie Seidel, Noemie Santamaria de Souza, Niko Beerenwinkel, Tanja Stadler                                                                                                  |                                                                                                                                                                                                                                                                                                                                                                                                                                                                         |
| EPI_ISL_1260539, EPI_ISL_1260541, EPI_ISL_1260542, EPI_ISL_1260545, EPI_ISL_1260546, EPI_ISL_1260548, EPI_ISL_1260549, EPI_ISL_1260550, EPI_ISL_1260552, EPI_ISL_1260555, EPI_ISL_1260556                                                                                                                                                                                                                                                                                                                                                                                                                                                                                                                                                                                                                                                                                                                                                                                                                                                                                                                                                                                                                                                                                                                                                                                                                                                                                                                                                                                                                                                                                                                                                                                                                                                                                                                                                                                                                                                                                                                                                                                                                                                                                                                                                                                                                                                                                                                                                                                                                                                                                                                                                                                                                                                                                                                                                                                                                                                                                                                                                                                                                                                                                                                                                                                                                                                                                                                                                                                                                                                                                                                                                                                                                                                                                                                                                                                                                                                                                                                                                                                                                                                                                                                                                                                                                                                                                                                                                                                                                                                                                                                                                                                                                                                                                                                                                                                                                                                                                                                                                                                                                                                                                                                                                                                                                                                                                                                                                                                                                                                                                                                                                                                                                                                                                                                                                                                                                                                                                                                                                                                                    | see above   | Viollier AG                                                  | Department of Biosystems Science and Engineering, ETH Zürich                                                                                                                                                                                                                                                                                                                                                                                                            | Chaoran Chen, Sarah Nadeau, Catharine Aquino, Ivan Topolsky, Philipp Jablonski, Lara Fuhrmann, David Dreifuss, Katharina Jahn, Andrea Cabral de Gouvea, Maria Domenica Moccia, Simon Grüter, Timothy Sykes, Lennart Opitz, Griffin White, Laura Neff, Doris Popovic, Andrea Patrignani, Jay Tracy, Ralph Schlapbach, Christiane Beckmann, Maurice Redondo, Olivier Kobel, Christoph Noppen, Sophie Seidel, Noemie Santamaria de Souza, Niko Beerenwinkel, Tanja Stadler |
| EPI_ISL_1260561                                                                                                                                                                                                                                                                                                                                                                                                                                                                                                                                                                                                                                                                                                                                                                                                                                                                                                                                                                                                                                                                                                                                                                                                                                                                                                                                                                                                                                                                                                                                                                                                                                                                                                                                                                                                                                                                                                                                                                                                                                                                                                                                                                                                                                                                                                                                                                                                                                                                                                                                                                                                                                                                                                                                                                                                                                                                                                                                                                                                                                                                                                                                                                                                                                                                                                                                                                                                                                                                                                                                                                                                                                                                                                                                                                                                                                                                                                                                                                                                                                                                                                                                                                                                                                                                                                                                                                                                                                                                                                                                                                                                                                                                                                                                                                                                                                                                                                                                                                                                                                                                                                                                                                                                                                                                                                                                                                                                                                                                                                                                                                                                                                                                                                                                                                                                                                                                                                                                                                                                                                                                                                                                                                              | Viollier AG | Department of Biosystems Science and Engineering, ETH Zürich | Chaoran Chen, Sarah Nadeau, Ivan Topolsky, Emmanouil Dermitzakis, Keith Harshman, Ioannis Xenarios, Henri Pegeot, Lorenzo Cerutti, Deborah Penet, Philipp Jablonski, Lara Fuhrmann, David Dreifuss, Katharina Jahn, Christiane Beckmann, Maurice Redondo, Olivier Kobel, Christoph Noppen, Sophie Seidel, Noemie Santamaria de Souza, Niko Beerenwinkel, Tanja Stadler                                                                                                  |                                                                                                                                                                                                                                                                                                                                                                                                                                                                         |
| EPI_ISL_1260565, EPI_ISL_1260566, EPI_ISL_1260569, EPI_ISL_1260570, EPI_ISL_1260571, EPI_ISL_1260578, EPI_ISL_1260580, EPI_ISL_1260581, EPI_ISL_1260589                                                                                                                                                                                                                                                                                                                                                                                                                                                                                                                                                                                                                                                                                                                                                                                                                                                                                                                                                                                                                                                                                                                                                                                                                                                                                                                                                                                                                                                                                                                                                                                                                                                                                                                                                                                                                                                                                                                                                                                                                                                                                                                                                                                                                                                                                                                                                                                                                                                                                                                                                                                                                                                                                                                                                                                                                                                                                                                                                                                                                                                                                                                                                                                                                                                                                                                                                                                                                                                                                                                                                                                                                                                                                                                                                                                                                                                                                                                                                                                                                                                                                                                                                                                                                                                                                                                                                                                                                                                                                                                                                                                                                                                                                                                                                                                                                                                                                                                                                                                                                                                                                                                                                                                                                                                                                                                                                                                                                                                                                                                                                                                                                                                                                                                                                                                                                                                                                                                                                                                                                                      | Viollier AG | Department of Biosystems Science and Engineering, ETH Zürich | Chaoran Chen, Sarah Nadeau, Catharine Aquino, Ivan Topolsky, Philipp Jablonski, Lara Fuhrmann, David Dreifuss, Katharina Jahn, Andrea Cabral de Gouvea, Maria Domenica Moccia, Simon Grüter, Timothy Sykes, Lennart Opitz, Griffin White, Laura Neff, Doris Popovic, Andrea Patrignani, Jay Tracy, Ralph Schlapbach, Christiane Beckmann, Maurice Redondo, Olivier Kobel, Christoph Noppen, Sophie Seidel, Noemie Santamaria de Souza, Niko Beerenwinkel, Tanja Stadler |                                                                                                                                                                                                                                                                                                                                                                                                                                                                         |
| EPI_ISL_1260590                                                                                                                                                                                                                                                                                                                                                                                                                                                                                                                                                                                                                                                                                                                                                                                                                                                                                                                                                                                                                                                                                                                                                                                                                                                                                                                                                                                                                                                                                                                                                                                                                                                                                                                                                                                                                                                                                                                                                                                                                                                                                                                                                                                                                                                                                                                                                                                                                                                                                                                                                                                                                                                                                                                                                                                                                                                                                                                                                                                                                                                                                                                                                                                                                                                                                                                                                                                                                                                                                                                                                                                                                                                                                                                                                                                                                                                                                                                                                                                                                                                                                                                                                                                                                                                                                                                                                                                                                                                                                                                                                                                                                                                                                                                                                                                                                                                                                                                                                                                                                                                                                                                                                                                                                                                                                                                                                                                                                                                                                                                                                                                                                                                                                                                                                                                                                                                                                                                                                                                                                                                                                                                                                                              | Viollier AG | Department of Biosystems Science and Engineering, ETH Zürich | Chaoran Chen, Sarah Nadeau, Ivan Topolsky, Emmanouil Dermitzakis, Keith Harshman, Ioannis Xenarios, Henri Pegeot, Lorenzo Cerutti, Deborah Penet, Philipp Jablonski, Lara Fuhrmann, David Dreifuss, Katharina Jahn, Christiane Beckmann, Maurice Redondo, Olivier Kobel, Christoph Noppen, Sophie Seidel, Noemie Santamaria de Souza, Niko Beerenwinkel, Tanja Stadler                                                                                                  |                                                                                                                                                                                                                                                                                                                                                                                                                                                                         |
| EPI_ISL_1260591                                                                                                                                                                                                                                                                                                                                                                                                                                                                                                                                                                                                                                                                                                                                                                                                                                                                                                                                                                                                                                                                                                                                                                                                                                                                                                                                                                                                                                                                                                                                                                                                                                                                                                                                                                                                                                                                                                                                                                                                                                                                                                                                                                                                                                                                                                                                                                                                                                                                                                                                                                                                                                                                                                                                                                                                                                                                                                                                                                                                                                                                                                                                                                                                                                                                                                                                                                                                                                                                                                                                                                                                                                                                                                                                                                                                                                                                                                                                                                                                                                                                                                                                                                                                                                                                                                                                                                                                                                                                                                                                                                                                                                                                                                                                                                                                                                                                                                                                                                                                                                                                                                                                                                                                                                                                                                                                                                                                                                                                                                                                                                                                                                                                                                                                                                                                                                                                                                                                                                                                                                                                                                                                                                              | Viollier AG | Department of Biosystems Science and Engineering, ETH Zürich | Chaoran Chen, Sarah Nadeau, Catharine Aquino, Ivan Topolsky, Philipp Jablonski, Lara Fuhrmann, David Dreifuss, Katharina Jahn, Andrea Cabral de Gouvea, Maria Domenica Moccia, Simon Grüter, Timothy Sykes, Lennart Opitz, Griffin White, Laura Neff, Doris Popovic, Andrea Patrignani, Jay Tracy, Ralph Schlapbach, Christiane Beckmann, Maurice Redondo, Olivier Kobel, Christoph Noppen, Sophie Seidel, Noemie Santamaria de Souza, Niko Beerenwinkel, Tanja Stadler |                                                                                                                                                                                                                                                                                                                                                                                                                                                                         |
| EPI_ISL_1260596, EPI_ISL_1260597                                                                                                                                                                                                                                                                                                                                                                                                                                                                                                                                                                                                                                                                                                                                                                                                                                                                                                                                                                                                                                                                                                                                                                                                                                                                                                                                                                                                                                                                                                                                                                                                                                                                                                                                                                                                                                                                                                                                                                                                                                                                                                                                                                                                                                                                                                                                                                                                                                                                                                                                                                                                                                                                                                                                                                                                                                                                                                                                                                                                                                                                                                                                                                                                                                                                                                                                                                                                                                                                                                                                                                                                                                                                                                                                                                                                                                                                                                                                                                                                                                                                                                                                                                                                                                                                                                                                                                                                                                                                                                                                                                                                                                                                                                                                                                                                                                                                                                                                                                                                                                                                                                                                                                                                                                                                                                                                                                                                                                                                                                                                                                                                                                                                                                                                                                                                                                                                                                                                                                                                                                                                                                                                                             | Viollier AG | Department of Biosystems Science and Engineering, ETH Zürich | Chaoran Chen, Sarah Nadeau, Ivan Topolsky, Emmanouil Dermitzakis, Keith Harshman, Ioannis Xenarios, Henri Pegeot, Lorenzo Cerutti, Deborah Penet, Philipp Jablonski, Lara Fuhrmann, David Dreifuss, Katharina Jahn, Christiane Beckmann, Maurice Redondo, Olivier Kobel, Christoph Noppen, Sophie Seidel, Noemie Santamaria de Souza, Niko Beerenwinkel, Tanja Stadler                                                                                                  |                                                                                                                                                                                                                                                                                                                                                                                                                                                                         |
| EPI_ISL_1260600, EPI_ISL_1260601, EPI_ISL_1260602, EPI_ISL_1260604                                                                                                                                                                                                                                                                                                                                                                                                                                                                                                                                                                                                                                                                                                                                                                                                                                                                                                                                                                                                                                                                                                                                                                                                                                                                                                                                                                                                                                                                                                                                                                                                                                                                                                                                                                                                                                                                                                                                                                                                                                                                                                                                                                                                                                                                                                                                                                                                                                                                                                                                                                                                                                                                                                                                                                                                                                                                                                                                                                                                                                                                                                                                                                                                                                                                                                                                                                                                                                                                                                                                                                                                                                                                                                                                                                                                                                                                                                                                                                                                                                                                                                                                                                                                                                                                                                                                                                                                                                                                                                                                                                                                                                                                                                                                                                                                                                                                                                                                                                                                                                                                                                                                                                                                                                                                                                                                                                                                                                                                                                                                                                                                                                                                                                                                                                                                                                                                                                                                                                                                                                                                                                                           | Viollier AG | Department of Biosystems Science and Engineering, ETH Zürich | Chaoran Chen, Sarah Nadeau, Catharine Aquino, Ivan Topolsky, Philipp Jablonski, Lara Fuhrmann, David Dreifuss, Katharina Jahn, Andrea Cabral de Gouvea, Maria Domenica Moccia, Simon Grüter, Timothy Sykes, Lennart Opitz, Griffin White, Laura Neff, Doris Popovic, Andrea Patrignani, Jay Tracy, Ralph Schlapbach, Christiane Beckmann, Maurice Redondo, Olivier Kobel, Christoph Noppen, Sophie Seidel, Noemie Santamaria de Souza, Niko Beerenwinkel, Tanja Stadler |                                                                                                                                                                                                                                                                                                                                                                                                                                                                         |
| EPI_ISL_1260606                                                                                                                                                                                                                                                                                                                                                                                                                                                                                                                                                                                                                                                                                                                                                                                                                                                                                                                                                                                                                                                                                                                                                                                                                                                                                                                                                                                                                                                                                                                                                                                                                                                                                                                                                                                                                                                                                                                                                                                                                                                                                                                                                                                                                                                                                                                                                                                                                                                                                                                                                                                                                                                                                                                                                                                                                                                                                                                                                                                                                                                                                                                                                                                                                                                                                                                                                                                                                                                                                                                                                                                                                                                                                                                                                                                                                                                                                                                                                                                                                                                                                                                                                                                                                                                                                                                                                                                                                                                                                                                                                                                                                                                                                                                                                                                                                                                                                                                                                                                                                                                                                                                                                                                                                                                                                                                                                                                                                                                                                                                                                                                                                                                                                                                                                                                                                                                                                                                                                                                                                                                                                                                                                                              | Viollier AG | Department of Biosystems Science and Engineering, ETH Zürich | Chaoran Chen, Sarah Nadeau, Ivan Topolsky, Emmanouil Dermitzakis, Keith Harshman, Ioannis Xenarios, Henri Pegeot, Lorenzo Cerutti, Deborah Penet, Philipp Jablonski, Lara Fuhrmann, David Dreifuss, Katharina Jahn, Christiane Beckmann, Maurice Redondo, Olivier Kobel, Christoph Noppen, Sophie Seidel, Noemie Santamaria de Souza, Niko Beerenwinkel, Tanja Stadler                                                                                                  |                                                                                                                                                                                                                                                                                                                                                                                                                                                                         |
| EPI_ISL_1260609                                                                                                                                                                                                                                                                                                                                                                                                                                                                                                                                                                                                                                                                                                                                                                                                                                                                                                                                                                                                                                                                                                                                                                                                                                                                                                                                                                                                                                                                                                                                                                                                                                                                                                                                                                                                                                                                                                                                                                                                                                                                                                                                                                                                                                                                                                                                                                                                                                                                                                                                                                                                                                                                                                                                                                                                                                                                                                                                                                                                                                                                                                                                                                                                                                                                                                                                                                                                                                                                                                                                                                                                                                                                                                                                                                                                                                                                                                                                                                                                                                                                                                                                                                                                                                                                                                                                                                                                                                                                                                                                                                                                                                                                                                                                                                                                                                                                                                                                                                                                                                                                                                                                                                                                                                                                                                                                                                                                                                                                                                                                                                                                                                                                                                                                                                                                                                                                                                                                                                                                                                                                                                                                                                              | Viollier AG | Department of Biosystems Science and Engineering, ETH Zürich | Chaoran Chen, Sarah Nadeau, Catharine Aquino, Ivan Topolsky, Philipp Jablonski, Lara Fuhrmann, David Dreifuss, Katharina Jahn, Andrea Cabral de Gouvea, Maria Domenica Moccia, Simon Grüter, Timothy Sykes, Lennart Opitz, Griffin White, Laura Neff, Doris Popovic, Andrea Patrignani, Jay Tracy, Ralph Schlapbach, Christiane Beckmann, Maurice Redondo, Olivier Kobel, Christoph Noppen, Sophie Seidel, Noemie Santamaria de Souza, Niko Beerenwinkel, Tanja Stadler |                                                                                                                                                                                                                                                                                                                                                                                                                                                                         |
| EPI_ISL_1273445, EPI_ISL_1273449, EPI_ISL_1273450, EPI_ISL_1273451, EPI_ISL_1273452, EPI_ISL_1273462, EPI_ISL_1273463, EPI_ISL_1273485, EPI_ISL_1273486, EPI_ISL_1273487, EPI_ISL_1273488, EPI_ISL_1273489, EPI_ISL_1273490, EPI_ISL_1273491, EPI_ISL_1273492, EPI_ISL_1273493, EPI_ISL_1273494, EPI_ISL_1273495, EPI_ISL_1273496, EPI_ISL_1273497, EPI_ISL_1273498, EPI_ISL_1273499, EPI_ISL_1273500, EPI_ISL_1273501, EPI_ISL_1273502, EPI_ISL_1273503, EPI_ISL_1273504, EPI_ISL_1273505, EPI_ISL_1273506, EPI_ISL_1273507, EPI_ISL_1273508, EPI_ISL_1273509, EPI_ISL_1273510, EPI_ISL_1273511, EPI_ISL_1273512, EPI_ISL_1273513, EPI_ISL_1273514, EPI_ISL_1273515, EPI_ISL_1273518, EPI_ISL_1273519, EPI_ISL_1273520, EPI_ISL_1273521, EPI_ISL_1273522, EPI_ISL_1273523, EPI_ISL_1273524, EPI_ISL_1273525, EPI_ISL_1273526, EPI_ISL_1273527, EPI_ISL_1273528, EPI_ISL_1273529, EPI_ISL_1273530, EPI_ISL_1273531, EPI_ISL_1273532, EPI_ISL_1273533, EPI_ISL_1273534, EPI_ISL_1273535, EPI_ISL_1273536, EPI_ISL_1273537, EPI_ISL_1273538, EPI_ISL_1273539, EPI_ISL_1273540, EPI_ISL_1273541, EPI_ISL_1273542, EPI_ISL_1273543, EPI_ISL_1273544, EPI_ISL_1273545, EPI_ISL_1273546, EPI_ISL_1273547, EPI_ISL_1273548, EPI_ISL_1273549, EPI_ISL_1273550, EPI_ISL_1273551, EPI_ISL_1273552, EPI_ISL_1273553, EPI_ISL_1273554, EPI_ISL_1273555, EPI_ISL_1273556, EPI_ISL_1273557, EPI_ISL_1273558, EPI_ISL_1273559, EPI_ISL_1273560, EPI_ISL_1273561, EPI_ISL_1273562, EPI_ISL_1273563, EPI_ISL_1273564, EPI_ISL_1273565, EPI_ISL_1273566, EPI_ISL_1273567, EPI_ISL_1273568, EPI_ISL_1273569, EPI_ISL_1273570, EPI_ISL_1273571, EPI_ISL_1273572, EPI_ISL_1273573, EPI_ISL_1273574, EPI_ISL_1273575, EPI_ISL_1273576, EPI_ISL_1273577, EPI_ISL_1273578, EPI_ISL_1273579, EPI_ISL_1273580, EPI_ISL_1273581, EPI_ISL_1273582, EPI_ISL_1273583, EPI_ISL_1273584, EPI_ISL_1273585, EPI_ISL_1273586, EPI_ISL_1273587, EPI_ISL_1273588, EPI_ISL_1273589, EPI_ISL_1273590, EPI_ISL_1273591, EPI_ISL_1273592, EPI_ISL_1273593, EPI_ISL_1273594, EPI_ISL_1273595, EPI_ISL_1273596, EPI_ISL_1273597, EPI_ISL_1273598, EPI_ISL_1273599, EPI_ISL_1273600, EPI_ISL_1273601, EPI_ISL_1273602, EPI_ISL_1273603, EPI_ISL_1273604, EPI_ISL_1273605, EPI_ISL_1273606, EPI_ISL_1273607, EPI_ISL_1273608, EPI_ISL_1273609, EPI_ISL_1273610, EPI_ISL_1273611, EPI_ISL_1273612, EPI_ISL_1273613, EPI_ISL_1273614, EPI_ISL_1273615, EPI_ISL_1273616, EPI_ISL_1273617, EPI_ISL_1273618, EPI_ISL_1273619, EPI_ISL_1273620, EPI_ISL_1273621, EPI_ISL_1273622, EPI_ISL_1273623, EPI_ISL_1273624, EPI_ISL_1273625, EPI_ISL_1273626, EPI_ISL_1273627, EPI_ISL_1273628, EPI_ISL_1273629, EPI_ISL_1273630, EPI_ISL_1273631, EPI_ISL_1273632, EPI_ISL_1273633, EPI_ISL_1273634, EPI_ISL_1273635, EPI_ISL_1273636, EPI_ISL_1273637, EPI_ISL_1273638, EPI_ISL_1273639, EPI_ISL_1273640, EPI_ISL_1273641, EPI_ISL_1273642, EPI_ISL_1273643, EPI_ISL_1273644, EPI_ISL_1273645, EPI_ISL_1273646, EPI_ISL_1273647, EPI_ISL_1273648, EPI_ISL_1273649, EPI_ISL_1273650, EPI_ISL_1273651, EPI_ISL_1273652, EPI_ISL_1273653, EPI_ISL_1273654, EPI_ISL_1273655, EPI_ISL_1273656, EPI_ISL_1273657, EPI_ISL_1273658, EPI_ISL_1273659, EPI_ISL_1273660, EPI_ISL_1273661, EPI_ISL_1273662, EPI_ISL_1273663, EPI_ISL_1273664, EPI_ISL_1273665, EPI_ISL_1273666, EPI_ISL_1273667, EPI_ISL_1273668, EPI_ISL_1273669, EPI_ISL_1273670, EPI_ISL_1273671, EPI_ISL_1273672, EPI_ISL_1273673, EPI_ISL_1273674, EPI_ISL_1273675, EPI_ISL_1273676, EPI_ISL_1273677, EPI_ISL_1273678, EPI_ISL_1273679, EPI_ISL_1273680, EPI_ISL_1273681, EPI_ISL_1273682, EPI_ISL_1273683, EPI_ISL_1273684, EPI_ISL_1273685, EPI_ISL_1273686, EPI_ISL_1273687, EPI_ISL_1273688, EPI_ISL_1273689, EPI_ISL_1273690, EPI_ISL_1273691, EPI_ISL_1273692, EPI_ISL_1273693, EPI_ISL_1273694, EPI_ISL_1273695, EPI_ISL_1273696, EPI_ISL_1273697, EPI_ISL_1273698, EPI_ISL_1273699, EPI_ISL_1273700, EPI_ISL_1273701, EPI_ISL_1273702, EPI_ISL_1273703, EPI_ISL_1273704, EPI_ISL_1273705, EPI_ISL_1273706, EPI_ISL_1273707, EPI_ISL_1273708, EPI_ISL_1273709, EPI_ISL_1273710, EPI_ISL_1273711, EPI_ISL_1273712, EPI_ISL_1273713, EPI_ISL_1273714, EPI_ISL_1273715, EPI_ISL_1273716, EPI_ISL_1273717, EPI_ISL_1273718, EPI_ISL_1273719, EPI_ISL_1273720, EPI_ISL_1273721, EPI_ISL_1273722, EPI_ISL_1273723, EPI_ISL_1273724, EPI_ISL_1273725, EPI_ISL_1273726, EPI_ISL_1273727, EPI_ISL_1273728, EPI_ISL_1273729, EPI_ISL_1273730, EPI_ISL_1273731, EPI_ISL_1273732, EPI_ISL_1273733, EPI_ISL_1273734, EPI_ISL_1273735, EPI_ISL_1273736, EPI_ISL_1273737, EPI_ISL_1273738, EPI_ISL_1273739, EPI_ISL_1273740, EPI_ISL_1273741, EPI_ISL_1273742, EPI_ISL_1273743, EPI_ISL_1273744, EPI_ISL_1273745, EPI_ISL_1273746, EPI_ISL_1273747, EPI_ISL_1273748, EPI_ISL_1273749, EPI_ISL_1273750, EPI_ISL_1273751, EPI_ISL_1273752, EPI_ISL_1273753, EPI_ISL_1273754, EPI_ISL_1273755, EPI_ISL_1273756, EPI_ISL_1273757, EPI_ISL_1273758, EPI_ISL_1273759, EPI_ISL_1273760, EPI_ISL_1273761, EPI_ISL_1273762, EPI_ISL_1273763, EPI_ISL_1273764, EPI_ISL_1273765, EPI_ISL_1273766, EPI_ISL_1273767, EPI_ISL_1273768, EPI_ISL_1273769, EPI_ISL_1273770, EPI_ISL_1273771, EPI_ISL_1273772, EPI_ISL_1273773, EPI_ISL_1273774, EPI_ISL_1273775, EPI_ISL_1273776, EPI_ISL_1273777, EPI_ISL_1273778, EPI_ISL_1273779, EPI_ISL_1273780, EPI_ISL_1273781, EPI_ISL_1273782, EPI_ISL_1273783, EPI_ISL_1273784, EPI_ISL_1273785, EPI_ISL_1273786, EPI_ISL_1273787, EPI_ISL_1273788, EPI_ISL_1273789, EPI_ISL_1273790, EPI_ISL_1273791, EPI_ISL_1273792, EPI_ISL_1273793, EPI_ISL_1273794, EPI_ISL_1273795, EPI_ISL_1273796, EPI_ISL_1273797, EPI_ISL_1273798, EPI_ISL_1273799, EPI_ISL_1273800, EPI_ISL_1273801, EPI_ISL_1273802, EPI_ISL_1273803, EPI_ISL_1273804, EPI_ISL_1273805, EPI_ISL_1273806, EPI_ISL_1273807, EPI_ISL_1273808, EPI_ISL_1273809, EPI_ISL_1273810, EPI_ISL_1273811, EPI_ISL_1273812, EPI_ISL_1273813, EPI_ISL_1273814, EPI_ISL_1273815, EPI_ISL_1273816, EPI_ISL_1273817, EPI_ISL_1273818, EPI_ISL_1273819, EPI_ISL_1273820, EPI_ISL_1273821, EPI_ISL_1273822, EPI_ISL_1273823, EPI_ISL_1273824, EPI_ISL_1273825, EPI_ISL_1273826, EPI_ISL_1273827, EPI_ISL_1273828, EPI_ISL_1273829 | see above   | University Hospital Basel, Clinical Virology                 | University Hospital Basel, Clinical Bacteriology                                                                                                                                                                                                                                                                                                                                                                                                                        | Tim Roloff, Madlen Stange, Helena MB Seth-Smith, Alfredo Mari, Karoline Leuzinger, Julia Bielicki, Manuel Battegay, Hans Hirsch, Adrian Egli                                                                                                                                                                                                                                                                                                                            |
| EPI_ISL_1299885, EPI_ISL_1299886, EPI_ISL_1299887, EPI_ISL_1299888, EPI_ISL_1299889, EPI_ISL_1299890, EPI_ISL_1299891, EPI_ISL_1299893, EPI_ISL_1299895, EPI_ISL_1299896, EPI_ISL_1299897, EPI_ISL_1299899, EPI_ISL_1299900, EPI_ISL_1299901, EPI_ISL_1299902, EPI_ISL_1299924                                                                                                                                                                                                                                                                                                                                                                                                                                                                                                                                                                                                                                                                                                                                                                                                                                                                                                                                                                                                                                                                                                                                                                                                                                                                                                                                                                                                                                                                                                                                                                                                                                                                                                                                                                                                                                                                                                                                                                                                                                                                                                                                                                                                                                                                                                                                                                                                                                                                                                                                                                                                                                                                                                                                                                                                                                                                                                                                                                                                                                                                                                                                                                                                                                                                                                                                                                                                                                                                                                                                                                                                                                                                                                                                                                                                                                                                                                                                                                                                                                                                                                                                                                                                                                                                                                                                                                                                                                                                                                                                                                                                                                                                                                                                                                                                                                                                                                                                                                                                                                                                                                                                                                                                                                                                                                                                                                                                                                                                                                                                                                                                                                                                                                                                                                                                                                                                                                               | see above   | Labormedizinisches Zentrum Dr Risch                          | University Hospital Basel, Clinical Bacteriology                                                                                                                                                                                                                                                                                                                                                                                                                        | Tim Roloff, Madlen Stange, Helena MB Seth-Smith, Alfredo Mari, Karoline Leuzinger, Julia Bielicki, Nadia Wohlwend, Martin Risch, Lorenz Risch, Manuel Battegay, Hans Hirsch, Adrian Egli                                                                                                                                                                                                                                                                                |
| EPI_ISL_1310789                                                                                                                                                                                                                                                                                                                                                                                                                                                                                                                                                                                                                                                                                                                                                                                                                                                                                                                                                                                                                                                                                                                                                                                                                                                                                                                                                                                                                                                                                                                                                                                                                                                                                                                                                                                                                                                                                                                                                                                                                                                                                                                                                                                                                                                                                                                                                                                                                                                                                                                                                                                                                                                                                                                                                                                                                                                                                                                                                                                                                                                                                                                                                                                                                                                                                                                                                                                                                                                                                                                                                                                                                                                                                                                                                                                                                                                                                                                                                                                                                                                                                                                                                                                                                                                                                                                                                                                                                                                                                                                                                                                                                                                                                                                                                                                                                                                                                                                                                                                                                                                                                                                                                                                                                                                                                                                                                                                                                                                                                                                                                                                                                                                                                                                                                                                                                                                                                                                                                                                                                                                                                                                                                                              |             | University Hospital Zürich                                   | Institute of Medical Virology, University of Zurich                                                                                                                                                                                                                                                                                                                                                                                                                     | Verena Kufner, Gabriela Ziltener, Maryam Zaheri, Stefan Schmutz, Annette Audigé, Maria Grünberg, Kevin Steiner, Jon Huder, Cyril Shah, Riccarda Capaul, Guido Bloemberg, Jürg Böni, Michael Huber, Alexandra Trkola, Wolfensberger Aline, Frey Andrea Christina, Schärer Verena                                                                                                                                                                                         |
| EPI_ISL_1370208                                                                                                                                                                                                                                                                                                                                                                                                                                                                                                                                                                                                                                                                                                                                                                                                                                                                                                                                                                                                                                                                                                                                                                                                                                                                                                                                                                                                                                                                                                                                                                                                                                                                                                                                                                                                                                                                                                                                                                                                                                                                                                                                                                                                                                                                                                                                                                                                                                                                                                                                                                                                                                                                                                                                                                                                                                                                                                                                                                                                                                                                                                                                                                                                                                                                                                                                                                                                                                                                                                                                                                                                                                                                                                                                                                                                                                                                                                                                                                                                                                                                                                                                                                                                                                                                                                                                                                                                                                                                                                                                                                                                                                                                                                                                                                                                                                                                                                                                                                                                                                                                                                                                                                                                                                                                                                                                                                                                                                                                                                                                                                                                                                                                                                                                                                                                                                                                                                                                                                                                                                                                                                                                                                              |             | CHUV                                                         | Laboratory of genomics and metagenomics, Institute of Microbiology, University Hospital Centre and University of Lausanne, Switzerland                                                                                                                                                                                                                                                                                                                                  | Trestan Pillonel, Damien Jacot, Sébastien Aeby, Gilbert Greub, Claire Bertelli                                                                                                                                                                                                                                                                                                                                                                                          |
| EPI_ISL_1388201                                                                                                                                                                                                                                                                                                                                                                                                                                                                                                                                                                                                                                                                                                                                                                                                                                                                                                                                                                                                                                                                                                                                                                                                                                                                                                                                                                                                                                                                                                                                                                                                                                                                                                                                                                                                                                                                                                                                                                                                                                                                                                                                                                                                                                                                                                                                                                                                                                                                                                                                                                                                                                                                                                                                                                                                                                                                                                                                                                                                                                                                                                                                                                                                                                                                                                                                                                                                                                                                                                                                                                                                                                                                                                                                                                                                                                                                                                                                                                                                                                                                                                                                                                                                                                                                                                                                                                                                                                                                                                                                                                                                                                                                                                                                                                                                                                                                                                                                                                                                                                                                                                                                                                                                                                                                                                                                                                                                                                                                                                                                                                                                                                                                                                                                                                                                                                                                                                                                                                                                                                                                                                                                                                              |             | University Hospital Basel, Clinical Virology                 | University Hospital Basel, Clinical Bacteriology                                                                                                                                                                                                                                                                                                                                                                                                                        | Tim Roloff, Madlen Stange, Helena MB Seth-Smith, Alfredo Mari, Karoline Leuzinger, Julia Bielicki, Manuel Battegay, Hans Hirsch, Adrian Egli                                                                                                                                                                                                                                                                                                                            |
| EPI_ISL_1388202                                                                                                                                                                                                                                                                                                                                                                                                                                                                                                                                                                                                                                                                                                                                                                                                                                                                                                                                                                                                                                                                                                                                                                                                                                                                                                                                                                                                                                                                                                                                                                                                                                                                                                                                                                                                                                                                                                                                                                                                                                                                                                                                                                                                                                                                                                                                                                                                                                                                                                                                                                                                                                                                                                                                                                                                                                                                                                                                                                                                                                                                                                                                                                                                                                                                                                                                                                                                                                                                                                                                                                                                                                                                                                                                                                                                                                                                                                                                                                                                                                                                                                                                                                                                                                                                                                                                                                                                                                                                                                                                                                                                                                                                                                                                                                                                                                                                                                                                                                                                                                                                                                                                                                                                                                                                                                                                                                                                                                                                                                                                                                                                                                                                                                                                                                                                                                                                                                                                                                                                                                                                                                                                                                              |             | Viollier AG                                                  | University Hospital Basel, Clinical Bacteriology                                                                                                                                                                                                                                                                                                                                                                                                                        | Tim Roloff, Madlen Stange, Helena MB Seth-Smith, Alfredo Mari, Karoline Leuzinger, Julia Bielicki, Christiane Beckmann, Manuel Battegay, Hans Hirsch, Adrian Egli                                                                                                                                                                                                                                                                                                       |
| EPI_ISL_1388214, EPI_ISL_1388218, EPI_ISL_1388244                                                                                                                                                                                                                                                                                                                                                                                                                                                                                                                                                                                                                                                                                                                                                                                                                                                                                                                                                                                                                                                                                                                                                                                                                                                                                                                                                                                                                                                                                                                                                                                                                                                                                                                                                                                                                                                                                                                                                                                                                                                                                                                                                                                                                                                                                                                                                                                                                                                                                                                                                                                                                                                                                                                                                                                                                                                                                                                                                                                                                                                                                                                                                                                                                                                                                                                                                                                                                                                                                                                                                                                                                                                                                                                                                                                                                                                                                                                                                                                                                                                                                                                                                                                                                                                                                                                                                                                                                                                                                                                                                                                                                                                                                                                                                                                                                                                                                                                                                                                                                                                                                                                                                                                                                                                                                                                                                                                                                                                                                                                                                                                                                                                                                                                                                                                                                                                                                                                                                                                                                                                                                                                                            |             | University Hospital Basel, Clinical Virology                 | University Hospital Basel, Clinical Bacteriology                                                                                                                                                                                                                                                                                                                                                                                                                        | Tim Roloff, Madlen Stange, Helena MB Seth-Smith, Alfredo Mari, Karoline Leuzinger, Julia Bielicki, Manuel Battegay, Hans Hirsch, Adrian Egli                                                                                                                                                                                                                                                                                                                            |
| EPI_ISL_1388247                                                                                                                                                                                                                                                                                                                                                                                                                                                                                                                                                                                                                                                                                                                                                                                                                                                                                                                                                                                                                                                                                                                                                                                                                                                                                                                                                                                                                                                                                                                                                                                                                                                                                                                                                                                                                                                                                                                                                                                                                                                                                                                                                                                                                                                                                                                                                                                                                                                                                                                                                                                                                                                                                                                                                                                                                                                                                                                                                                                                                                                                                                                                                                                                                                                                                                                                                                                                                                                                                                                                                                                                                                                                                                                                                                                                                                                                                                                                                                                                                                                                                                                                                                                                                                                                                                                                                                                                                                                                                                                                                                                                                                                                                                                                                                                                                                                                                                                                                                                                                                                                                                                                                                                                                                                                                                                                                                                                                                                                                                                                                                                                                                                                                                                                                                                                                                                                                                                                                                                                                                                                                                                                                                              |             | University Hospital Basel, Clinical Virology                 | University Hospital Basel, Clinical Bacteriology                                                                                                                                                                                                                                                                                                                                                                                                                        | Tim Roloff, Madlen Stange, Helena MB Seth-Smith, Alfredo Mari, Karoline Leuzinger, Julia Bielicki, Simon Fuchs, Manuel Battegay, Hans Hirsch, Adrian Egli                                                                                                                                                                                                                                                                                                               |
| EPI_ISL_1388249, EPI_ISL_1388261, EPI_ISL_1388275, EPI_ISL_1388277, EPI_ISL_1388279, EPI_ISL_1388283                                                                                                                                                                                                                                                                                                                                                                                                                                                                                                                                                                                                                                                                                                                                                                                                                                                                                                                                                                                                                                                                                                                                                                                                                                                                                                                                                                                                                                                                                                                                                                                                                                                                                                                                                                                                                                                                                                                                                                                                                                                                                                                                                                                                                                                                                                                                                                                                                                                                                                                                                                                                                                                                                                                                                                                                                                                                                                                                                                                                                                                                                                                                                                                                                                                                                                                                                                                                                                                                                                                                                                                                                                                                                                                                                                                                                                                                                                                                                                                                                                                                                                                                                                                                                                                                                                                                                                                                                                                                                                                                                                                                                                                                                                                                                                                                                                                                                                                                                                                                                                                                                                                                                                                                                                                                                                                                                                                                                                                                                                                                                                                                                                                                                                                                                                                                                                                                                                                                                                                                                                                                                         |             | University Hospital Basel, Clinical Virology                 | University Hospital Basel, Clinical Bacteriology                                                                                                                                                                                                                                                                                                                                                                                                                        | Tim Roloff, Madlen Stange, Helena MB Seth-Smith, Alfredo Mari, Karoline Leuzinger, Julia Bielicki, Manuel Battegay, Hans Hirsch, Adrian Egli                                                                                                                                                                                                                                                                                                                            |
| EPI_ISL_1388289                                                                                                                                                                                                                                                                                                                                                                                                                                                                                                                                                                                                                                                                                                                                                                                                                                                                                                                                                                                                                                                                                                                                                                                                                                                                                                                                                                                                                                                                                                                                                                                                                                                                                                                                                                                                                                                                                                                                                                                                                                                                                                                                                                                                                                                                                                                                                                                                                                                                                                                                                                                                                                                                                                                                                                                                                                                                                                                                                                                                                                                                                                                                                                                                                                                                                                                                                                                                                                                                                                                                                                                                                                                                                                                                                                                                                                                                                                                                                                                                                                                                                                                                                                                                                                                                                                                                                                                                                                                                                                                                                                                                                                                                                                                                                                                                                                                                                                                                                                                                                                                                                                                                                                                                                                                                                                                                                                                                                                                                                                                                                                                                                                                                                                                                                                                                                                                                                                                                                                                                                                                                                                                                                                              |             | Rothen Medizinische Laboratorien AG                          | University Hospital Basel, Clinical Bacteriology                                                                                                                                                                                                                                                                                                                                                                                                                        | Tim Roloff, Madlen Stange, Helena MB Seth-Smith, Alfredo Mari, Karoline Leuzinger, Julia Bielicki, Ingrid Steffen, Manuel Battegay, Hans Hirsch, Adrian Egli                                                                                                                                                                                                                                                                                                            |
| EPI_ISL_1388301                                                                                                                                                                                                                                                                                                                                                                                                                                                                                                                                                                                                                                                                                                                                                                                                                                                                                                                                                                                                                                                                                                                                                                                                                                                                                                                                                                                                                                                                                                                                                                                                                                                                                                                                                                                                                                                                                                                                                                                                                                                                                                                                                                                                                                                                                                                                                                                                                                                                                                                                                                                                                                                                                                                                                                                                                                                                                                                                                                                                                                                                                                                                                                                                                                                                                                                                                                                                                                                                                                                                                                                                                                                                                                                                                                                                                                                                                                                                                                                                                                                                                                                                                                                                                                                                                                                                                                                                                                                                                                                                                                                                                                                                                                                                                                                                                                                                                                                                                                                                                                                                                                                                                                                                                                                                                                                                                                                                                                                                                                                                                                                                                                                                                                                                                                                                                                                                                                                                                                                                                                                                                                                                                                              |             | University Hospital Basel, Clinical Virology                 | University Hospital Basel, Clinical Bacteriology                                                                                                                                                                                                                                                                                                                                                                                                                        | Tim Roloff, Madlen Stange, Helena MB Seth-Smith, Alfredo Mari, Karoline Leuzinger, Julia Bielicki, Manuel Battegay, Hans Hirsch, Adrian Egli                                                                                                                                                                                                                                                                                                                            |
| EPI_ISL_1388308                                                                                                                                                                                                                                                                                                                                                                                                                                                                                                                                                                                                                                                                                                                                                                                                                                                                                                                                                                                                                                                                                                                                                                                                                                                                                                                                                                                                                                                                                                                                                                                                                                                                                                                                                                                                                                                                                                                                                                                                                                                                                                                                                                                                                                                                                                                                                                                                                                                                                                                                                                                                                                                                                                                                                                                                                                                                                                                                                                                                                                                                                                                                                                                                                                                                                                                                                                                                                                                                                                                                                                                                                                                                                                                                                                                                                                                                                                                                                                                                                                                                                                                                                                                                                                                                                                                                                                                                                                                                                                                                                                                                                                                                                                                                                                                                                                                                                                                                                                                                                                                                                                                                                                                                                                                                                                                                                                                                                                                                                                                                                                                                                                                                                                                                                                                                                                                                                                                                                                                                                                                                                                                                                                              |             | Rothen Medizinische Laboratorien AG                          | University Hospital Basel, Clinical Bacteriology                                                                                                                                                                                                                                                                                                                                                                                                                        | Tim Roloff, Madlen Stange, Helena MB Seth-Smith, Alfredo Mari, Karoline Leuzinger, Julia Bielicki, Ingrid Steffen, Manuel Battegay, Hans Hirsch, Adrian Egli                                                                                                                                                                                                                                                                                                            |







































































































|                                                                                                                                                                                                                                                                                                                                                                                                                                                                                                                                                                                                                                                                                                                                                                                                                                                                                                                                                                                                                                                                                                                                                                                                                                                                                                                                                                                                                                                                                                                                                                                                                                                                                                                                                                                                                                                                                                                                                                                                                                                                                                                                                                                                                                                                                                                                                                                                                                                                                                                                                                                                                                                                                                                                                                                                                                                                                                    |                  |                                                                                                                                        |                                                                                                                                                                                                                                                                                                                                                                                                                                                                          |                                                                                                                                                                                                                                                                                                                                                                                                                                                                          |
|----------------------------------------------------------------------------------------------------------------------------------------------------------------------------------------------------------------------------------------------------------------------------------------------------------------------------------------------------------------------------------------------------------------------------------------------------------------------------------------------------------------------------------------------------------------------------------------------------------------------------------------------------------------------------------------------------------------------------------------------------------------------------------------------------------------------------------------------------------------------------------------------------------------------------------------------------------------------------------------------------------------------------------------------------------------------------------------------------------------------------------------------------------------------------------------------------------------------------------------------------------------------------------------------------------------------------------------------------------------------------------------------------------------------------------------------------------------------------------------------------------------------------------------------------------------------------------------------------------------------------------------------------------------------------------------------------------------------------------------------------------------------------------------------------------------------------------------------------------------------------------------------------------------------------------------------------------------------------------------------------------------------------------------------------------------------------------------------------------------------------------------------------------------------------------------------------------------------------------------------------------------------------------------------------------------------------------------------------------------------------------------------------------------------------------------------------------------------------------------------------------------------------------------------------------------------------------------------------------------------------------------------------------------------------------------------------------------------------------------------------------------------------------------------------------------------------------------------------------------------------------------------------|------------------|----------------------------------------------------------------------------------------------------------------------------------------|--------------------------------------------------------------------------------------------------------------------------------------------------------------------------------------------------------------------------------------------------------------------------------------------------------------------------------------------------------------------------------------------------------------------------------------------------------------------------|--------------------------------------------------------------------------------------------------------------------------------------------------------------------------------------------------------------------------------------------------------------------------------------------------------------------------------------------------------------------------------------------------------------------------------------------------------------------------|
| see above                                                                                                                                                                                                                                                                                                                                                                                                                                                                                                                                                                                                                                                                                                                                                                                                                                                                                                                                                                                                                                                                                                                                                                                                                                                                                                                                                                                                                                                                                                                                                                                                                                                                                                                                                                                                                                                                                                                                                                                                                                                                                                                                                                                                                                                                                                                                                                                                                                                                                                                                                                                                                                                                                                                                                                                                                                                                                          | Viollier AG      | Department of Biosystems Science and Engineering, ETH Zürich                                                                           | Chaoran Chen, Sarah Nadeau, Catharine Aquino, Ivan Topolsky, Philipp Jablonski, Lara Fuhrmann, David Dreifuss, Katharina Jahn, Andreia Cabral de Gouvea, Maria Domenica Moccia, Simon Grüter, Timothy Sykes, Lennart Opitz, Griffin White, Laura Neff, Doris Popovic, Andrea Patrignani, Jay Tracy, Ralph Schlapbach, Christiane Beckmann, Maurice Redondo, Olivier Kobel, Christoph Noppen, Sophie Seidel, Noemie Santamaria de Souza, Niko Beerenwinkel, Tanja Stadler |                                                                                                                                                                                                                                                                                                                                                                                                                                                                          |
| EPI_ISL_1003894                                                                                                                                                                                                                                                                                                                                                                                                                                                                                                                                                                                                                                                                                                                                                                                                                                                                                                                                                                                                                                                                                                                                                                                                                                                                                                                                                                                                                                                                                                                                                                                                                                                                                                                                                                                                                                                                                                                                                                                                                                                                                                                                                                                                                                                                                                                                                                                                                                                                                                                                                                                                                                                                                                                                                                                                                                                                                    | Viollier AG      | Department of Biosystems Science and Engineering, ETH Zürich                                                                           | Christian Beisel, Sarah Nadeau, Chaoran Chen, Ivan Topolsky, Philipp Jablonski, Lara Fuhrmann, David Dreifuss, Katharina Jahn, Rebecca Denes, Ina Nissen, Natascha Santacroce, Elodie Burcklen, Christiane Beckmann, Maurice Redondo, Olivier Kobel, Christoph Noppen, Sophie Seidel, Noemie Santamaria de Souza, Niko Beerenwinkel, Tanja Stadler                                                                                                                       |                                                                                                                                                                                                                                                                                                                                                                                                                                                                          |
| EPI_ISL_1003895, EPI_ISL_1003896, EPI_ISL_1003897, EPI_ISL_1003898, EPI_ISL_1003899, EPI_ISL_1003900, EPI_ISL_1003901, EPI_ISL_1003902, EPI_ISL_1003903, EPI_ISL_1003904, EPI_ISL_1003905, EPI_ISL_1003906, EPI_ISL_1003907, EPI_ISL_1003908, EPI_ISL_1003909, EPI_ISL_1003910, EPI_ISL_1003911                                                                                                                                                                                                                                                                                                                                                                                                                                                                                                                                                                                                                                                                                                                                                                                                                                                                                                                                                                                                                                                                                                                                                                                                                                                                                                                                                                                                                                                                                                                                                                                                                                                                                                                                                                                                                                                                                                                                                                                                                                                                                                                                                                                                                                                                                                                                                                                                                                                                                                                                                                                                    | see above        | Viollier AG                                                                                                                            | Department of Biosystems Science and Engineering, ETH Zürich                                                                                                                                                                                                                                                                                                                                                                                                             | Chaoran Chen, Sarah Nadeau, Catharine Aquino, Ivan Topolsky, Philipp Jablonski, Lara Fuhrmann, David Dreifuss, Katharina Jahn, Andreia Cabral de Gouvea, Maria Domenica Moccia, Simon Grüter, Timothy Sykes, Lennart Opitz, Griffin White, Laura Neff, Doris Popovic, Andrea Patrignani, Jay Tracy, Ralph Schlapbach, Christiane Beckmann, Maurice Redondo, Olivier Kobel, Christoph Noppen, Sophie Seidel, Noemie Santamaria de Souza, Niko Beerenwinkel, Tanja Stadler |
| EPI_ISL_1003912                                                                                                                                                                                                                                                                                                                                                                                                                                                                                                                                                                                                                                                                                                                                                                                                                                                                                                                                                                                                                                                                                                                                                                                                                                                                                                                                                                                                                                                                                                                                                                                                                                                                                                                                                                                                                                                                                                                                                                                                                                                                                                                                                                                                                                                                                                                                                                                                                                                                                                                                                                                                                                                                                                                                                                                                                                                                                    | Viollier AG      | Department of Biosystems Science and Engineering, ETH Zürich                                                                           | Christian Beisel, Sarah Nadeau, Chaoran Chen, Ivan Topolsky, Philipp Jablonski, Lara Fuhrmann, David Dreifuss, Katharina Jahn, Rebecca Denes, Ina Nissen, Natascha Santacroce, Elodie Burcklen, Christiane Beckmann, Maurice Redondo, Olivier Kobel, Christoph Noppen, Sophie Seidel, Noemie Santamaria de Souza, Niko Beerenwinkel, Tanja Stadler                                                                                                                       |                                                                                                                                                                                                                                                                                                                                                                                                                                                                          |
| EPI_ISL_1003913, EPI_ISL_1003914, EPI_ISL_1003915, EPI_ISL_1003916, EPI_ISL_1003917, EPI_ISL_1003918, EPI_ISL_1003919, EPI_ISL_1003920, EPI_ISL_1003921, EPI_ISL_1003922, EPI_ISL_1003923, EPI_ISL_1003924, EPI_ISL_1003925, EPI_ISL_1003926, EPI_ISL_1003927, EPI_ISL_1003928, EPI_ISL_1003929, EPI_ISL_1003930, EPI_ISL_1003931, EPI_ISL_1003932, EPI_ISL_1003933, EPI_ISL_1003934, EPI_ISL_1003935, EPI_ISL_1003936, EPI_ISL_1003937, EPI_ISL_1003938, EPI_ISL_1003939, EPI_ISL_1003940, EPI_ISL_1003941, EPI_ISL_1003942, EPI_ISL_1003943, EPI_ISL_1003944, EPI_ISL_1003945, EPI_ISL_1003946, EPI_ISL_1003947, EPI_ISL_1003948, EPI_ISL_1003949, EPI_ISL_1003950, EPI_ISL_1003951, EPI_ISL_1003952, EPI_ISL_1003953, EPI_ISL_1003954, EPI_ISL_1003955, EPI_ISL_1003956, EPI_ISL_1003957, EPI_ISL_1003958, EPI_ISL_1003959, EPI_ISL_1003960, EPI_ISL_1003961, EPI_ISL_1003962, EPI_ISL_1003963, EPI_ISL_1003964, EPI_ISL_1003965, EPI_ISL_1003966, EPI_ISL_1003967, EPI_ISL_1003968, EPI_ISL_1003969, EPI_ISL_1003970, EPI_ISL_1003971, EPI_ISL_1003972, EPI_ISL_1003973, EPI_ISL_1003974, EPI_ISL_1003975, EPI_ISL_1003976, EPI_ISL_1003977, EPI_ISL_1003978, EPI_ISL_1003979, EPI_ISL_1003980, EPI_ISL_1003981, EPI_ISL_1003982, EPI_ISL_1003983, EPI_ISL_1003984, EPI_ISL_1003985, EPI_ISL_1003986, EPI_ISL_1003987, EPI_ISL_1003988, EPI_ISL_1003989, EPI_ISL_1003990, EPI_ISL_1003991, EPI_ISL_1003992, EPI_ISL_1003993, EPI_ISL_1003994, EPI_ISL_1003995, EPI_ISL_1003996, EPI_ISL_1003997, EPI_ISL_1003998, EPI_ISL_1003999, EPI_ISL_1004000, EPI_ISL_1004001, EPI_ISL_1004002, EPI_ISL_1004003, EPI_ISL_1004004, EPI_ISL_1004005, EPI_ISL_1004006, EPI_ISL_1004007, EPI_ISL_1004008, EPI_ISL_1004009, EPI_ISL_1004010, EPI_ISL_1004011, EPI_ISL_1004012, EPI_ISL_1004013, EPI_ISL_1004014, EPI_ISL_1004015, EPI_ISL_1004016, EPI_ISL_1004017, EPI_ISL_1004018, EPI_ISL_1004019, EPI_ISL_1004020, EPI_ISL_1004021, EPI_ISL_1004022, EPI_ISL_1004023, EPI_ISL_1004024, EPI_ISL_1004025, EPI_ISL_1004026, EPI_ISL_1004027, EPI_ISL_1004028, EPI_ISL_1004029, EPI_ISL_1004030, EPI_ISL_1004031, EPI_ISL_1004032, EPI_ISL_1004033, EPI_ISL_1004034, EPI_ISL_1004035, EPI_ISL_1004036, EPI_ISL_1004037, EPI_ISL_1004038, EPI_ISL_1004039, EPI_ISL_1004040, EPI_ISL_1004041, EPI_ISL_1004042, EPI_ISL_1004043, EPI_ISL_1004044, EPI_ISL_1004045, EPI_ISL_1004046, EPI_ISL_1004047, EPI_ISL_1004048, EPI_ISL_1004049, EPI_ISL_1004050, EPI_ISL_1004051, EPI_ISL_1004052, EPI_ISL_1004053, EPI_ISL_1004054, EPI_ISL_1004055, EPI_ISL_1004056, EPI_ISL_1004057, EPI_ISL_1004058, EPI_ISL_1004059, EPI_ISL_1004060, EPI_ISL_1004061, EPI_ISL_1004062, EPI_ISL_1004063, EPI_ISL_1004064, EPI_ISL_1004065, EPI_ISL_1004066, EPI_ISL_1004067, EPI_ISL_1004068, EPI_ISL_1004069, EPI_ISL_1004070, EPI_ISL_1004071, EPI_ISL_1004072, EPI_ISL_1004073, EPI_ISL_1004074, EPI_ISL_1004075, EPI_ISL_1004076 | see above        | Viollier AG                                                                                                                            | Department of Biosystems Science and Engineering, ETH Zürich                                                                                                                                                                                                                                                                                                                                                                                                             | Chaoran Chen, Sarah Nadeau, Catharine Aquino, Ivan Topolsky, Philipp Jablonski, Lara Fuhrmann, David Dreifuss, Katharina Jahn, Andreia Cabral de Gouvea, Maria Domenica Moccia, Simon Grüter, Timothy Sykes, Lennart Opitz, Griffin White, Laura Neff, Doris Popovic, Andrea Patrignani, Jay Tracy, Ralph Schlapbach, Christiane Beckmann, Maurice Redondo, Olivier Kobel, Christoph Noppen, Sophie Seidel, Noemie Santamaria de Souza, Niko Beerenwinkel, Tanja Stadler |
| EPI_ISL_1007585                                                                                                                                                                                                                                                                                                                                                                                                                                                                                                                                                                                                                                                                                                                                                                                                                                                                                                                                                                                                                                                                                                                                                                                                                                                                                                                                                                                                                                                                                                                                                                                                                                                                                                                                                                                                                                                                                                                                                                                                                                                                                                                                                                                                                                                                                                                                                                                                                                                                                                                                                                                                                                                                                                                                                                                                                                                                                    | EHC MORGES       | Laboratory of genomics and metagenomics, Institute of Microbiology, University Hospital Centre and University of Lausanne, Switzerland | Trestan Pilonel, Damien Jacot, Sébastien Aebly, Gilbert Greub, Claire Bertelli                                                                                                                                                                                                                                                                                                                                                                                           |                                                                                                                                                                                                                                                                                                                                                                                                                                                                          |
| EPI_ISL_1007586, EPI_ISL_1007587                                                                                                                                                                                                                                                                                                                                                                                                                                                                                                                                                                                                                                                                                                                                                                                                                                                                                                                                                                                                                                                                                                                                                                                                                                                                                                                                                                                                                                                                                                                                                                                                                                                                                                                                                                                                                                                                                                                                                                                                                                                                                                                                                                                                                                                                                                                                                                                                                                                                                                                                                                                                                                                                                                                                                                                                                                                                   | CHUV             | Laboratory of genomics and metagenomics, Institute of Microbiology, University Hospital Centre and University of Lausanne, Switzerland | Trestan Pilonel, Damien Jacot, Sébastien Aebly, Gilbert Greub, Claire Bertelli                                                                                                                                                                                                                                                                                                                                                                                           |                                                                                                                                                                                                                                                                                                                                                                                                                                                                          |
| EPI_ISL_1007588, EPI_ISL_1007589                                                                                                                                                                                                                                                                                                                                                                                                                                                                                                                                                                                                                                                                                                                                                                                                                                                                                                                                                                                                                                                                                                                                                                                                                                                                                                                                                                                                                                                                                                                                                                                                                                                                                                                                                                                                                                                                                                                                                                                                                                                                                                                                                                                                                                                                                                                                                                                                                                                                                                                                                                                                                                                                                                                                                                                                                                                                   | VIDYMED LAUSANNE | Laboratory of genomics and metagenomics, Institute of Microbiology, University Hospital Centre and University of Lausanne, Switzerland | Trestan Pilonel, Damien Jacot, Sébastien Aebly, Gilbert Greub, Claire Bertelli                                                                                                                                                                                                                                                                                                                                                                                           |                                                                                                                                                                                                                                                                                                                                                                                                                                                                          |
| EPI_ISL_1007590                                                                                                                                                                                                                                                                                                                                                                                                                                                                                                                                                                                                                                                                                                                                                                                                                                                                                                                                                                                                                                                                                                                                                                                                                                                                                                                                                                                                                                                                                                                                                                                                                                                                                                                                                                                                                                                                                                                                                                                                                                                                                                                                                                                                                                                                                                                                                                                                                                                                                                                                                                                                                                                                                                                                                                                                                                                                                    | HIB              | Laboratory of genomics and metagenomics, Institute of Microbiology, University Hospital Centre and University of Lausanne, Switzerland | Trestan Pilonel, Damien Jacot, Sébastien Aebly, Gilbert Greub, Claire Bertelli                                                                                                                                                                                                                                                                                                                                                                                           |                                                                                                                                                                                                                                                                                                                                                                                                                                                                          |
| EPI_ISL_1007591, EPI_ISL_1007592, EPI_ISL_1007593, EPI_ISL_1007594, EPI_ISL_1007595                                                                                                                                                                                                                                                                                                                                                                                                                                                                                                                                                                                                                                                                                                                                                                                                                                                                                                                                                                                                                                                                                                                                                                                                                                                                                                                                                                                                                                                                                                                                                                                                                                                                                                                                                                                                                                                                                                                                                                                                                                                                                                                                                                                                                                                                                                                                                                                                                                                                                                                                                                                                                                                                                                                                                                                                                | CHUV             | Laboratory of genomics and metagenomics, Institute of Microbiology, University Hospital Centre and University of Lausanne, Switzerland | Trestan Pilonel, Damien Jacot, Sébastien Aebly, Gilbert Greub, Claire Bertelli                                                                                                                                                                                                                                                                                                                                                                                           |                                                                                                                                                                                                                                                                                                                                                                                                                                                                          |
| EPI_ISL_1007596                                                                                                                                                                                                                                                                                                                                                                                                                                                                                                                                                                                                                                                                                                                                                                                                                                                                                                                                                                                                                                                                                                                                                                                                                                                                                                                                                                                                                                                                                                                                                                                                                                                                                                                                                                                                                                                                                                                                                                                                                                                                                                                                                                                                                                                                                                                                                                                                                                                                                                                                                                                                                                                                                                                                                                                                                                                                                    | VIDYMED LAUSANNE | Laboratory of genomics and metagenomics, Institute of Microbiology, University Hospital Centre and University of Lausanne, Switzerland | Trestan Pilonel, Damien Jacot, Sébastien Aebly, Gilbert Greub, Claire Bertelli                                                                                                                                                                                                                                                                                                                                                                                           |                                                                                                                                                                                                                                                                                                                                                                                                                                                                          |
| EPI_ISL_1007597, EPI_ISL_1007598                                                                                                                                                                                                                                                                                                                                                                                                                                                                                                                                                                                                                                                                                                                                                                                                                                                                                                                                                                                                                                                                                                                                                                                                                                                                                                                                                                                                                                                                                                                                                                                                                                                                                                                                                                                                                                                                                                                                                                                                                                                                                                                                                                                                                                                                                                                                                                                                                                                                                                                                                                                                                                                                                                                                                                                                                                                                   | EHNV             | Laboratory of genomics and metagenomics, Institute of Microbiology, University Hospital Centre and University of Lausanne, Switzerland | Trestan Pilonel, Damien Jacot, Sébastien Aebly, Gilbert Greub, Claire Bertelli                                                                                                                                                                                                                                                                                                                                                                                           |                                                                                                                                                                                                                                                                                                                                                                                                                                                                          |
| EPI_ISL_1007599, EPI_ISL_1007600, EPI_ISL_1007601                                                                                                                                                                                                                                                                                                                                                                                                                                                                                                                                                                                                                                                                                                                                                                                                                                                                                                                                                                                                                                                                                                                                                                                                                                                                                                                                                                                                                                                                                                                                                                                                                                                                                                                                                                                                                                                                                                                                                                                                                                                                                                                                                                                                                                                                                                                                                                                                                                                                                                                                                                                                                                                                                                                                                                                                                                                  | CHUV             | Laboratory of genomics and metagenomics, Institute of Microbiology, University Hospital Centre and University of Lausanne, Switzerland | Trestan Pilonel, Damien Jacot, Sébastien Aebly, Gilbert Greub, Claire Bertelli                                                                                                                                                                                                                                                                                                                                                                                           |                                                                                                                                                                                                                                                                                                                                                                                                                                                                          |
| EPI_ISL_1007602                                                                                                                                                                                                                                                                                                                                                                                                                                                                                                                                                                                                                                                                                                                                                                                                                                                                                                                                                                                                                                                                                                                                                                                                                                                                                                                                                                                                                                                                                                                                                                                                                                                                                                                                                                                                                                                                                                                                                                                                                                                                                                                                                                                                                                                                                                                                                                                                                                                                                                                                                                                                                                                                                                                                                                                                                                                                                    | EHNV             | Laboratory of genomics and metagenomics, Institute of Microbiology, University Hospital Centre and University of Lausanne, Switzerland | Trestan Pilonel, Damien Jacot, Sébastien Aebly, Gilbert Greub, Claire Bertelli                                                                                                                                                                                                                                                                                                                                                                                           |                                                                                                                                                                                                                                                                                                                                                                                                                                                                          |
| EPI_ISL_1007603                                                                                                                                                                                                                                                                                                                                                                                                                                                                                                                                                                                                                                                                                                                                                                                                                                                                                                                                                                                                                                                                                                                                                                                                                                                                                                                                                                                                                                                                                                                                                                                                                                                                                                                                                                                                                                                                                                                                                                                                                                                                                                                                                                                                                                                                                                                                                                                                                                                                                                                                                                                                                                                                                                                                                                                                                                                                                    | CHUV             | Laboratory of genomics and metagenomics, Institute of Microbiology, University Hospital Centre and University of Lausanne, Switzerland | Trestan Pilonel, Damien Jacot, Sébastien Aebly, Gilbert Greub, Claire Bertelli                                                                                                                                                                                                                                                                                                                                                                                           |                                                                                                                                                                                                                                                                                                                                                                                                                                                                          |
| EPI_ISL_1007604                                                                                                                                                                                                                                                                                                                                                                                                                                                                                                                                                                                                                                                                                                                                                                                                                                                                                                                                                                                                                                                                                                                                                                                                                                                                                                                                                                                                                                                                                                                                                                                                                                                                                                                                                                                                                                                                                                                                                                                                                                                                                                                                                                                                                                                                                                                                                                                                                                                                                                                                                                                                                                                                                                                                                                                                                                                                                    | UNILABS - COPPET | Laboratory of genomics and metagenomics, Institute of                                                                                  | Trestan Pilonel, Damien Jacot, Sébastien Aebly, Gilbert Greub, Claire Bertelli                                                                                                                                                                                                                                                                                                                                                                                           |                                                                                                                                                                                                                                                                                                                                                                                                                                                                          |

|                                                                                                      |                                              |                                                                                  |                                                                                                                                        |                                                                                                                                                                                                  |
|------------------------------------------------------------------------------------------------------|----------------------------------------------|----------------------------------------------------------------------------------|----------------------------------------------------------------------------------------------------------------------------------------|--------------------------------------------------------------------------------------------------------------------------------------------------------------------------------------------------|
| EPI_ISL_1007605, EPI_ISL_1007606, EPI_ISL_1007607, EPI_ISL_1007608, EPI_ISL_1007609, EPI_ISL_1007610 | ADMED                                        | Microbiology, University Hospital Centre and University of Lausanne, Switzerland | Laboratory of genomics and metagenomics, Institute of Microbiology, University Hospital Centre and University of Lausanne, Switzerland | Trestan Pillonel, Damien Jacot, Sébastien Aeby, Gilbert Greub, Claire Bertelli                                                                                                                   |
| EPI_ISL_1007611                                                                                      | CHUV                                         | Microbiology, University Hospital Centre and University of Lausanne, Switzerland | Laboratory of genomics and metagenomics, Institute of Microbiology, University Hospital Centre and University of Lausanne, Switzerland | Trestan Pillonel, Damien Jacot, Sébastien Aeby, Gilbert Greub, Claire Bertelli                                                                                                                   |
| EPI_ISL_1007612, EPI_ISL_1007613                                                                     | Dr. Bard                                     | Microbiology, University Hospital Centre and University of Lausanne, Switzerland | Laboratory of genomics and metagenomics, Institute of Microbiology, University Hospital Centre and University of Lausanne, Switzerland | Trestan Pillonel, Damien Jacot, Sébastien Aeby, Gilbert Greub, Claire Bertelli                                                                                                                   |
| EPI_ISL_1007616                                                                                      | VIDYMED LAUSANNE                             | Microbiology, University Hospital Centre and University of Lausanne, Switzerland | Laboratory of genomics and metagenomics, Institute of Microbiology, University Hospital Centre and University of Lausanne, Switzerland | Trestan Pillonel, Damien Jacot, Sébastien Aeby, Gilbert Greub, Claire Bertelli                                                                                                                   |
| EPI_ISL_1007617                                                                                      | ICH-SION                                     | Microbiology, University Hospital Centre and University of Lausanne, Switzerland | Laboratory of genomics and metagenomics, Institute of Microbiology, University Hospital Centre and University of Lausanne, Switzerland | Trestan Pillonel, Damien Jacot, Sébastien Aeby, Gilbert Greub, Claire Bertelli                                                                                                                   |
| EPI_ISL_1007618                                                                                      | VIDYMED LA SOURCE                            | Microbiology, University Hospital Centre and University of Lausanne, Switzerland | Laboratory of genomics and metagenomics, Institute of Microbiology, University Hospital Centre and University of Lausanne, Switzerland | Trestan Pillonel, Damien Jacot, Sébastien Aeby, Gilbert Greub, Claire Bertelli                                                                                                                   |
| EPI_ISL_1007619                                                                                      | Vidy-UP                                      | Microbiology, University Hospital Centre and University of Lausanne, Switzerland | Laboratory of genomics and metagenomics, Institute of Microbiology, University Hospital Centre and University of Lausanne, Switzerland | Trestan Pillonel, Damien Jacot, Sébastien Aeby, Gilbert Greub, Claire Bertelli                                                                                                                   |
| EPI_ISL_1007620, EPI_ISL_1007621, EPI_ISL_1007622, EPI_ISL_1007623                                   | CHUV                                         | Microbiology, University Hospital Centre and University of Lausanne, Switzerland | Laboratory of genomics and metagenomics, Institute of Microbiology, University Hospital Centre and University of Lausanne, Switzerland | Trestan Pillonel, Damien Jacot, Sébastien Aeby, Gilbert Greub, Claire Bertelli                                                                                                                   |
| EPI_ISL_1007624                                                                                      | VIDYMED EPALINGES                            | Microbiology, University Hospital Centre and University of Lausanne, Switzerland | Laboratory of genomics and metagenomics, Institute of Microbiology, University Hospital Centre and University of Lausanne, Switzerland | Trestan Pillonel, Damien Jacot, Sébastien Aeby, Gilbert Greub, Claire Bertelli                                                                                                                   |
| EPI_ISL_1007625, EPI_ISL_1007626, EPI_ISL_1007627, EPI_ISL_1007628                                   | EHNV                                         | Microbiology, University Hospital Centre and University of Lausanne, Switzerland | Laboratory of genomics and metagenomics, Institute of Microbiology, University Hospital Centre and University of Lausanne, Switzerland | Trestan Pillonel, Damien Jacot, Sébastien Aeby, Gilbert Greub, Claire Bertelli                                                                                                                   |
| EPI_ISL_1007629, EPI_ISL_1007630                                                                     | ICH-SION                                     | Microbiology, University Hospital Centre and University of Lausanne, Switzerland | Laboratory of genomics and metagenomics, Institute of Microbiology, University Hospital Centre and University of Lausanne, Switzerland | Trestan Pillonel, Damien Jacot, Sébastien Aeby, Gilbert Greub, Claire Bertelli                                                                                                                   |
| EPI_ISL_1007631                                                                                      | EHNV                                         | Microbiology, University Hospital Centre and University of Lausanne, Switzerland | Laboratory of genomics and metagenomics, Institute of Microbiology, University Hospital Centre and University of Lausanne, Switzerland | Trestan Pillonel, Damien Jacot, Sébastien Aeby, Gilbert Greub, Claire Bertelli                                                                                                                   |
| EPI_ISL_1007632                                                                                      | LA SOURCE                                    | Microbiology, University Hospital Centre and University of Lausanne, Switzerland | Laboratory of genomics and metagenomics, Institute of Microbiology, University Hospital Centre and University of Lausanne, Switzerland | Trestan Pillonel, Damien Jacot, Sébastien Aeby, Gilbert Greub, Claire Bertelli                                                                                                                   |
| EPI_ISL_1007633                                                                                      | GHOL                                         | Microbiology, University Hospital Centre and University of Lausanne, Switzerland | Laboratory of genomics and metagenomics, Institute of Microbiology, University Hospital Centre and University of Lausanne, Switzerland | Trestan Pillonel, Damien Jacot, Sébastien Aeby, Gilbert Greub, Claire Bertelli                                                                                                                   |
| EPI_ISL_1007634, EPI_ISL_1007635                                                                     | EHNV                                         | Microbiology, University Hospital Centre and University of Lausanne, Switzerland | Laboratory of genomics and metagenomics, Institute of Microbiology, University Hospital Centre and University of Lausanne, Switzerland | Trestan Pillonel, Damien Jacot, Sébastien Aeby, Gilbert Greub, Claire Bertelli                                                                                                                   |
| EPI_ISL_1007636                                                                                      | UNISANTE                                     | Microbiology, University Hospital Centre and University of Lausanne, Switzerland | Laboratory of genomics and metagenomics, Institute of Microbiology, University Hospital Centre and University of Lausanne, Switzerland | Trestan Pillonel, Damien Jacot, Sébastien Aeby, Gilbert Greub, Claire Bertelli                                                                                                                   |
| EPI_ISL_1007637                                                                                      | CHUV                                         | Microbiology, University Hospital Centre and University of Lausanne, Switzerland | Laboratory of genomics and metagenomics, Institute of Microbiology, University Hospital Centre and University of Lausanne, Switzerland | Trestan Pillonel, Damien Jacot, Sébastien Aeby, Gilbert Greub, Claire Bertelli                                                                                                                   |
| EPI_ISL_1007638                                                                                      | Dr. Borel                                    | Microbiology, University Hospital Centre and University of Lausanne, Switzerland | Laboratory of genomics and metagenomics, Institute of Microbiology, University Hospital Centre and University of Lausanne, Switzerland | Trestan Pillonel, Damien Jacot, Sébastien Aeby, Gilbert Greub, Claire Bertelli                                                                                                                   |
| EPI_ISL_1007639                                                                                      | CHUV                                         | Microbiology, University Hospital Centre and University of Lausanne, Switzerland | Laboratory of genomics and metagenomics, Institute of Microbiology, University Hospital Centre and University of Lausanne, Switzerland | Trestan Pillonel, Damien Jacot, Sébastien Aeby, Gilbert Greub, Claire Bertelli                                                                                                                   |
| EPI_ISL_1007640                                                                                      | VIDYMED EPALINGES                            | Microbiology, University Hospital Centre and University of Lausanne, Switzerland | Laboratory of genomics and metagenomics, Institute of Microbiology, University Hospital Centre and University of Lausanne, Switzerland | Trestan Pillonel, Damien Jacot, Sébastien Aeby, Gilbert Greub, Claire Bertelli                                                                                                                   |
| EPI_ISL_1007641                                                                                      | HIB                                          | Microbiology, University Hospital Centre and University of Lausanne, Switzerland | Laboratory of genomics and metagenomics, Institute of Microbiology, University Hospital Centre and University of Lausanne, Switzerland | Trestan Pillonel, Damien Jacot, Sébastien Aeby, Gilbert Greub, Claire Bertelli                                                                                                                   |
| EPI_ISL_1014696, EPI_ISL_1014701                                                                     | University Hospital Basel, Clinical Virology | University Hospital Basel, Clinical Bacteriology                                 | University Hospital Basel, Clinical Bacteriology                                                                                       | Tim Roloff, Madlen Stange, Helena MB Seth-Smith, Alfredo Mari, Karoline Leuzinger, Julia Bielicki, Manuel Battegay, Hans Hirsch, Adrian Egli                                                     |
| EPI_ISL_1014703, EPI_ISL_1014704, EPI_ISL_1014705                                                    | Viollier AG                                  | University Hospital Basel, Clinical Bacteriology                                 | University Hospital Basel, Clinical Bacteriology                                                                                       | Tim Roloff, Madlen Stange, Helena MB Seth-Smith, Alfredo Mari, Karoline Leuzinger, Julia Bielicki, Christiane Beckmann, Manuel Battegay, Hans Hirsch, Adrian Egli                                |
| EPI_ISL_1039786                                                                                      | Kantonsspital Münsterlingen                  | Institute of Medical Virology, University of Zurich                              | Institute of Medical Virology, University of Zurich                                                                                    | Verena Kufner, Stefan Schmutz, Maryam Zaheri, Annette Audigé, Maria Grünberg, Kevin Steiner, Jon Huder, Cyril Shah, Riccarda Capaul, Guido Bloemberg, Jürg Böni, Michael Huber, Alexandra Trkola |
| EPI_ISL_1039787                                                                                      | Spital Männedorf AG                          | Institute of Medical Virology, University of Zurich                              | Institute of Medical Virology, University of Zurich                                                                                    | Verena Kufner, Stefan Schmutz, Maryam Zaheri, Annette Audigé, Maria Grünberg, Kevin Steiner, Jon Huder, Cyril Shah, Riccarda Capaul, Guido Bloemberg, Jürg Böni, Michael Huber, Alexandra Trkola |
| EPI_ISL_1039788                                                                                      | Kantonsspital Baden AG                       | Institute of Medical Virology, University of Zurich                              | Institute of Medical Virology, University of Zurich                                                                                    | Verena Kufner, Stefan Schmutz, Maryam Zaheri, Annette Audigé, Maria Grünberg, Kevin Steiner, Jon Huder, Cyril Shah, Riccarda Capaul, Guido Bloemberg, Jürg Böni, Michael Huber, Alexandra Trkola |





































































|                                                                                                                                                                                                                                                                                                                                                                                                                                                                                                                                                                                                                                                     |             |                                                              |                                                                                                                                                                                                                                                                                                                                                                                                                                                                         |                                                                                                                                                                                          |
|-----------------------------------------------------------------------------------------------------------------------------------------------------------------------------------------------------------------------------------------------------------------------------------------------------------------------------------------------------------------------------------------------------------------------------------------------------------------------------------------------------------------------------------------------------------------------------------------------------------------------------------------------------|-------------|--------------------------------------------------------------|-------------------------------------------------------------------------------------------------------------------------------------------------------------------------------------------------------------------------------------------------------------------------------------------------------------------------------------------------------------------------------------------------------------------------------------------------------------------------|------------------------------------------------------------------------------------------------------------------------------------------------------------------------------------------|
| EPI_ISL_1407039                                                                                                                                                                                                                                                                                                                                                                                                                                                                                                                                                                                                                                     | Viollier AG | Department of Biosystems Science and Engineering, ETH Zürich | Chaoran Chen, Sarah Nadeau, Catharine Aquino, Ivan Topolsky, Philipp Jablonski, Lara Fuhrmann, David Dreifuss, Katharina Jahn, Andreia Cabral de Gouvea, Maria Domenica Moccia, Simon Grüter, Timothy Sykes, Lennart Opitz, Griffin White, Laura Neff, Doris Popovic, Andrea Patrignani, Jay Tracy, Ralph Schlapbach, Christiane Beckmann, Maurice Redondo, Olivier Kobel, Christoph Noppen, Sophie Seidel, Noemie Santamaria de Souza, Niko Beerewinkel, Tanja Stadler |                                                                                                                                                                                          |
| EPI_ISL_1407040, EPI_ISL_1407042                                                                                                                                                                                                                                                                                                                                                                                                                                                                                                                                                                                                                    | Viollier AG | Department of Biosystems Science and Engineering, ETH Zürich | Christian Beisel, Sarah Nadeau, Chaoran Chen, Ivan Topolsky, Philipp Jablonski, Lara Fuhrmann, David Dreifuss, Katharina Jahn, Rebecca Denes, Mirjam Feldkamp, Ina Nissen, Natascha Santacroce, Elodie Burcklen, Christiane Beckmann, Maurice Redondo, Olivier Kobel, Christoph Noppen, Sophie Seidel, Noemie Santamaria de Souza, Niko Beerewinkel, Tanja Stadler                                                                                                      |                                                                                                                                                                                          |
| EPI_ISL_1407043                                                                                                                                                                                                                                                                                                                                                                                                                                                                                                                                                                                                                                     | Viollier AG | Department of Biosystems Science and Engineering, ETH Zürich | Chaoran Chen, Sarah Nadeau, Catharine Aquino, Ivan Topolsky, Philipp Jablonski, Lara Fuhrmann, David Dreifuss, Katharina Jahn, Andreia Cabral de Gouvea, Maria Domenica Moccia, Simon Grüter, Timothy Sykes, Lennart Opitz, Griffin White, Laura Neff, Doris Popovic, Andrea Patrignani, Jay Tracy, Ralph Schlapbach, Christiane Beckmann, Maurice Redondo, Olivier Kobel, Christoph Noppen, Sophie Seidel, Noemie Santamaria de Souza, Niko Beerewinkel, Tanja Stadler |                                                                                                                                                                                          |
| EPI_ISL_1407044, EPI_ISL_1407045                                                                                                                                                                                                                                                                                                                                                                                                                                                                                                                                                                                                                    | Viollier AG | Department of Biosystems Science and Engineering, ETH Zürich | Christian Beisel, Sarah Nadeau, Chaoran Chen, Ivan Topolsky, Philipp Jablonski, Lara Fuhrmann, David Dreifuss, Katharina Jahn, Rebecca Denes, Mirjam Feldkamp, Ina Nissen, Natascha Santacroce, Elodie Burcklen, Christiane Beckmann, Maurice Redondo, Olivier Kobel, Christoph Noppen, Sophie Seidel, Noemie Santamaria de Souza, Niko Beerewinkel, Tanja Stadler                                                                                                      |                                                                                                                                                                                          |
| EPI_ISL_1407046                                                                                                                                                                                                                                                                                                                                                                                                                                                                                                                                                                                                                                     | Viollier AG | Department of Biosystems Science and Engineering, ETH Zürich | Chaoran Chen, Sarah Nadeau, Ivan Topolsky, Emmanouil Dermitzakis, Keith Harshman, Ioannis Xenarios, Henri Pegeot, Lorenzo Cerutti, Deborah Penet, Philipp Jablonski, Lara Fuhrmann, David Dreifuss, Katharina Jahn, Christiane Beckmann, Maurice Redondo, Olivier Kobel, Christoph Noppen, Sophie Seidel, Noemie Santamaria de Souza, Niko Beerewinkel, Tanja Stadler                                                                                                   |                                                                                                                                                                                          |
| EPI_ISL_1407049                                                                                                                                                                                                                                                                                                                                                                                                                                                                                                                                                                                                                                     | Viollier AG | Department of Biosystems Science and Engineering, ETH Zürich | Christian Beisel, Sarah Nadeau, Chaoran Chen, Ivan Topolsky, Philipp Jablonski, Lara Fuhrmann, David Dreifuss, Katharina Jahn, Rebecca Denes, Mirjam Feldkamp, Ina Nissen, Natascha Santacroce, Elodie Burcklen, Christiane Beckmann, Maurice Redondo, Olivier Kobel, Christoph Noppen, Sophie Seidel, Noemie Santamaria de Souza, Niko Beerewinkel, Tanja Stadler                                                                                                      |                                                                                                                                                                                          |
| EPI_ISL_1407051                                                                                                                                                                                                                                                                                                                                                                                                                                                                                                                                                                                                                                     | Viollier AG | Department of Biosystems Science and Engineering, ETH Zürich | Chaoran Chen, Sarah Nadeau, Catharine Aquino, Ivan Topolsky, Philipp Jablonski, Lara Fuhrmann, David Dreifuss, Katharina Jahn, Andreia Cabral de Gouvea, Maria Domenica Moccia, Simon Grüter, Timothy Sykes, Lennart Opitz, Griffin White, Laura Neff, Doris Popovic, Andrea Patrignani, Jay Tracy, Ralph Schlapbach, Christiane Beckmann, Maurice Redondo, Olivier Kobel, Christoph Noppen, Sophie Seidel, Noemie Santamaria de Souza, Niko Beerewinkel, Tanja Stadler |                                                                                                                                                                                          |
| EPI_ISL_1407055                                                                                                                                                                                                                                                                                                                                                                                                                                                                                                                                                                                                                                     | Viollier AG | Department of Biosystems Science and Engineering, ETH Zürich | Christian Beisel, Sarah Nadeau, Chaoran Chen, Ivan Topolsky, Philipp Jablonski, Lara Fuhrmann, David Dreifuss, Katharina Jahn, Rebecca Denes, Mirjam Feldkamp, Ina Nissen, Natascha Santacroce, Elodie Burcklen, Christiane Beckmann, Maurice Redondo, Olivier Kobel, Christoph Noppen, Sophie Seidel, Noemie Santamaria de Souza, Niko Beerewinkel, Tanja Stadler                                                                                                      |                                                                                                                                                                                          |
| EPI_ISL_1407056                                                                                                                                                                                                                                                                                                                                                                                                                                                                                                                                                                                                                                     | Viollier AG | Department of Biosystems Science and Engineering, ETH Zürich | Chaoran Chen, Sarah Nadeau, Ivan Topolsky, Emmanouil Dermitzakis, Keith Harshman, Ioannis Xenarios, Henri Pegeot, Lorenzo Cerutti, Deborah Penet, Philipp Jablonski, Lara Fuhrmann, David Dreifuss, Katharina Jahn, Christiane Beckmann, Maurice Redondo, Olivier Kobel, Christoph Noppen, Sophie Seidel, Noemie Santamaria de Souza, Niko Beerewinkel, Tanja Stadler                                                                                                   |                                                                                                                                                                                          |
| EPI_ISL_1407060, EPI_ISL_1407061                                                                                                                                                                                                                                                                                                                                                                                                                                                                                                                                                                                                                    | Viollier AG | Department of Biosystems Science and Engineering, ETH Zürich | Christian Beisel, Sarah Nadeau, Chaoran Chen, Ivan Topolsky, Philipp Jablonski, Lara Fuhrmann, David Dreifuss, Katharina Jahn, Rebecca Denes, Mirjam Feldkamp, Ina Nissen, Natascha Santacroce, Elodie Burcklen, Christiane Beckmann, Maurice Redondo, Olivier Kobel, Christoph Noppen, Sophie Seidel, Noemie Santamaria de Souza, Niko Beerewinkel, Tanja Stadler                                                                                                      |                                                                                                                                                                                          |
| EPI_ISL_1407063, EPI_ISL_1407064                                                                                                                                                                                                                                                                                                                                                                                                                                                                                                                                                                                                                    | Viollier AG | Department of Biosystems Science and Engineering, ETH Zürich | Chaoran Chen, Sarah Nadeau, Catharine Aquino, Ivan Topolsky, Philipp Jablonski, Lara Fuhrmann, David Dreifuss, Katharina Jahn, Andreia Cabral de Gouvea, Maria Domenica Moccia, Simon Grüter, Timothy Sykes, Lennart Opitz, Griffin White, Laura Neff, Doris Popovic, Andrea Patrignani, Jay Tracy, Ralph Schlapbach, Christiane Beckmann, Maurice Redondo, Olivier Kobel, Christoph Noppen, Sophie Seidel, Noemie Santamaria de Souza, Niko Beerewinkel, Tanja Stadler |                                                                                                                                                                                          |
| EPI_ISL_1407069, EPI_ISL_1407070, EPI_ISL_1407071, EPI_ISL_1407072                                                                                                                                                                                                                                                                                                                                                                                                                                                                                                                                                                                  | Viollier AG | Department of Biosystems Science and Engineering, ETH Zürich | Chaoran Chen, Sarah Nadeau, Ivan Topolsky, Emmanouil Dermitzakis, Keith Harshman, Ioannis Xenarios, Henri Pegeot, Lorenzo Cerutti, Deborah Penet, Philipp Jablonski, Lara Fuhrmann, David Dreifuss, Katharina Jahn, Christiane Beckmann, Maurice Redondo, Olivier Kobel, Christoph Noppen, Sophie Seidel, Noemie Santamaria de Souza, Niko Beerewinkel, Tanja Stadler                                                                                                   |                                                                                                                                                                                          |
| EPI_ISL_1407073, EPI_ISL_1407074, EPI_ISL_1407075                                                                                                                                                                                                                                                                                                                                                                                                                                                                                                                                                                                                   | Viollier AG | Department of Biosystems Science and Engineering, ETH Zürich | Chaoran Chen, Sarah Nadeau, Catharine Aquino, Ivan Topolsky, Philipp Jablonski, Lara Fuhrmann, David Dreifuss, Katharina Jahn, Andreia Cabral de Gouvea, Maria Domenica Moccia, Simon Grüter, Timothy Sykes, Lennart Opitz, Griffin White, Laura Neff, Doris Popovic, Andrea Patrignani, Jay Tracy, Ralph Schlapbach, Christiane Beckmann, Maurice Redondo, Olivier Kobel, Christoph Noppen, Sophie Seidel, Noemie Santamaria de Souza, Niko Beerewinkel, Tanja Stadler |                                                                                                                                                                                          |
| EPI_ISL_1407076                                                                                                                                                                                                                                                                                                                                                                                                                                                                                                                                                                                                                                     | Viollier AG | Department of Biosystems Science and Engineering, ETH Zürich | Chaoran Chen, Sarah Nadeau, Ivan Topolsky, Emmanouil Dermitzakis, Keith Harshman, Ioannis Xenarios, Henri Pegeot, Lorenzo Cerutti, Deborah Penet, Philipp Jablonski, Lara Fuhrmann, David Dreifuss, Katharina Jahn, Christiane Beckmann, Maurice Redondo, Olivier Kobel, Christoph Noppen, Sophie Seidel, Noemie Santamaria de Souza, Niko Beerewinkel, Tanja Stadler                                                                                                   |                                                                                                                                                                                          |
| EPI_ISL_1407078                                                                                                                                                                                                                                                                                                                                                                                                                                                                                                                                                                                                                                     | Viollier AG | Department of Biosystems Science and Engineering, ETH Zürich | Christian Beisel, Sarah Nadeau, Chaoran Chen, Ivan Topolsky, Philipp Jablonski, Lara Fuhrmann, David Dreifuss, Katharina Jahn, Rebecca Denes, Mirjam Feldkamp, Ina Nissen, Natascha Santacroce, Elodie Burcklen, Christiane Beckmann, Maurice Redondo, Olivier Kobel, Christoph Noppen, Sophie Seidel, Noemie Santamaria de Souza, Niko Beerewinkel, Tanja Stadler                                                                                                      |                                                                                                                                                                                          |
| EPI_ISL_1407080, EPI_ISL_1407081, EPI_ISL_1407082, EPI_ISL_1407083, EPI_ISL_1407084, EPI_ISL_1407085, EPI_ISL_1407086, EPI_ISL_1407087, EPI_ISL_1407088, EPI_ISL_1407089, EPI_ISL_1407090, EPI_ISL_1407091, EPI_ISL_1407092, EPI_ISL_1407093, EPI_ISL_1407094                                                                                                                                                                                                                                                                                                                                                                                       | see above   | Viollier AG                                                  | Chaoran Chen, Sarah Nadeau, Ivan Topolsky, Emmanouil Dermitzakis, Keith Harshman, Ioannis Xenarios, Henri Pegeot, Lorenzo Cerutti, Deborah Penet, Philipp Jablonski, Lara Fuhrmann, David Dreifuss, Katharina Jahn, Christiane Beckmann, Maurice Redondo, Olivier Kobel, Christoph Noppen, Sophie Seidel, Noemie Santamaria de Souza, Niko Beerewinkel, Tanja Stadler                                                                                                   |                                                                                                                                                                                          |
| EPI_ISL_1496257                                                                                                                                                                                                                                                                                                                                                                                                                                                                                                                                                                                                                                     | Viollier AG | Department of Biosystems Science and Engineering, ETH Zürich | Christian Beisel, Sarah Nadeau, Chaoran Chen, Ivan Topolsky, Philipp Jablonski, Lara Fuhrmann, David Dreifuss, Katharina Jahn, Rebecca Denes, Mirjam Feldkamp, Ina Nissen, Natascha Santacroce, Elodie Burcklen, Christiane Beckmann, Maurice Redondo, Olivier Kobel, Christoph Noppen, Sophie Seidel, Noemie Santamaria de Souza, Niko Beerewinkel, Tanja Stadler                                                                                                      |                                                                                                                                                                                          |
| EPI_ISL_1517298                                                                                                                                                                                                                                                                                                                                                                                                                                                                                                                                                                                                                                     | CHUV        | Laboratory of genomics and metagenomics                      | Trestan Pillonel, Damien Jacot, SÁ@bastien Aeby, Gilbert Greub, Claire Bertelli                                                                                                                                                                                                                                                                                                                                                                                         |                                                                                                                                                                                          |
| EPI_ISL_1670550, EPI_ISL_1670551, EPI_ISL_1670552, EPI_ISL_1670553, EPI_ISL_1670557, EPI_ISL_1670560, EPI_ISL_1670564, EPI_ISL_1670566, EPI_ISL_1670567, EPI_ISL_1670568, EPI_ISL_1670569, EPI_ISL_1670570, EPI_ISL_1670571, EPI_ISL_1670572, EPI_ISL_1670573, EPI_ISL_1670575, EPI_ISL_1670576, EPI_ISL_1670577, EPI_ISL_1670578, EPI_ISL_1670579, EPI_ISL_1670580, EPI_ISL_1670581, EPI_ISL_1670582, EPI_ISL_1670583, EPI_ISL_1670584, EPI_ISL_1670585, EPI_ISL_1670586, EPI_ISL_1670587, EPI_ISL_1670588, EPI_ISL_1670589, EPI_ISL_1670590, EPI_ISL_1670591, EPI_ISL_1670592, EPI_ISL_1670593, EPI_ISL_1670594, EPI_ISL_1706589, EPI_ISL_1706590 | see above   | Biolytix AG                                                  | Swiss Tropical and Public Health Institute                                                                                                                                                                                                                                                                                                                                                                                                                              | Salome Hosch, Philipp Wagner, Curdin Decurtins, Anna Henger, Ralf Seyfarth, Adrian Hári, Claudia Daubenberger, Tobias Schindler                                                          |
| EPI_ISL_1829193                                                                                                                                                                                                                                                                                                                                                                                                                                                                                                                                                                                                                                     | EHC MORGES  | Laboratory of genomics and metagenomics                      | Trestan Pillonel, Damien Jacot, Sébastien Aeby, Gilbert Greub, Claire Bertelli                                                                                                                                                                                                                                                                                                                                                                                          |                                                                                                                                                                                          |
| EPI_ISL_1914612, EPI_ISL_1914613, EPI_ISL_1914614, EPI_ISL_1914615, EPI_ISL_1914616, EPI_ISL_1914617, EPI_ISL_1914618, EPI_ISL_1914619, EPI_ISL_1914620, EPI_ISL_1914621, EPI_ISL_1914622, EPI_ISL_1914623, EPI_ISL_1914624, EPI_ISL_1914625, EPI_ISL_1914626, EPI_ISL_1914627, EPI_ISL_1914628, EPI_ISL_1914629, EPI_ISL_1914630, EPI_ISL_1914631, EPI_ISL_1914632, EPI_ISL_1914633, EPI_ISL_1914634, EPI_ISL_1914635, EPI_ISL_1914636, EPI_ISL_1914637, EPI_ISL_1914638                                                                                                                                                                           | see above   | Labormedizinisches Zentrum Dr Risch                          | Clinical Bacteriology                                                                                                                                                                                                                                                                                                                                                                                                                                                   | Tim Roloff, Madlen Stange, Helena MB Seth-Smith, Alfredo Mari, Karoline Leuzinger, Julia Bielicki, Nadia Wohlwend, Martin Risch, Lorenz Risch, Manuel Battegay, Hans Hirsch, Adrian Egli |
| EPI_ISL_1993811, EPI_ISL_1993812                                                                                                                                                                                                                                                                                                                                                                                                                                                                                                                                                                                                                    | see above   | Clinical Virology                                            | Clinical Bacteriology                                                                                                                                                                                                                                                                                                                                                                                                                                                   | Tim Roloff, Madlen Stange, Helena MB Seth-Smith, Alfredo Mari, Karoline Leuzinger, Julia Bielicki, Manuel Battegay, Hans Hirsch, Adrian Egli                                             |
| EPI_ISL_1993926                                                                                                                                                                                                                                                                                                                                                                                                                                                                                                                                                                                                                                     | see above   | Labormedizinisches Zentrum Dr Risch                          | Clinical Bacteriology                                                                                                                                                                                                                                                                                                                                                                                                                                                   | Tim Roloff, Madlen Stange, Helena MB Seth-Smith, Alfredo Mari, Karoline Leuzinger, Julia Bielicki, Nadia Wohlwend, Martin Risch, Lorenz Risch, Manuel Battegay, Hans Hirsch, Adrian Egli |
| EPI_ISL_2110390, EPI_ISL_2110392, EPI_ISL_2110394, EPI_ISL_2110395, EPI_ISL_2110398, EPI_ISL_2110400, EPI_ISL_2110401, EPI_ISL_2110403, EPI_ISL_2110404, EPI_ISL_2110405, EPI_ISL_2110407, EPI_ISL_2110408, EPI_ISL_2110410, EPI_ISL_2110411, EPI_ISL_2110413, EPI_ISL_2110418, EPI_ISL_2110419, EPI_ISL_2110421, EPI_ISL_2110422                                                                                                                                                                                                                                                                                                                   | see above   | Liebefeld, Switzerland                                       | University Hospital Basel, Switzerland                                                                                                                                                                                                                                                                                                                                                                                                                                  | Tim Roloff, Madlen Stange, Helena MB Seth-Smith, Alfredo Mari, Karoline Leuzinger, Julia Bielicki, Nadia Wohlwend, Martin Risch, Lorenz Risch, Manuel Battegay, Hans Hirsch, Adrian Egli |

|                                                                                                                                                                                                                                                                                                                                                                                                                                                                                                                                                                                                                                                                                                                                                                                                                                                                                                                                                                                                                                                                                                                                                                                                                                                                                                                                                                                                                                                                                                                                                                                                                                                                                                                                                                                                                                                                                                                                                                                                                                                                                                                                                                                                                                                                                                                                                                                                |                                                                    |                                                                                                                                                                         |                                                                                                                                                                                                                              |
|------------------------------------------------------------------------------------------------------------------------------------------------------------------------------------------------------------------------------------------------------------------------------------------------------------------------------------------------------------------------------------------------------------------------------------------------------------------------------------------------------------------------------------------------------------------------------------------------------------------------------------------------------------------------------------------------------------------------------------------------------------------------------------------------------------------------------------------------------------------------------------------------------------------------------------------------------------------------------------------------------------------------------------------------------------------------------------------------------------------------------------------------------------------------------------------------------------------------------------------------------------------------------------------------------------------------------------------------------------------------------------------------------------------------------------------------------------------------------------------------------------------------------------------------------------------------------------------------------------------------------------------------------------------------------------------------------------------------------------------------------------------------------------------------------------------------------------------------------------------------------------------------------------------------------------------------------------------------------------------------------------------------------------------------------------------------------------------------------------------------------------------------------------------------------------------------------------------------------------------------------------------------------------------------------------------------------------------------------------------------------------------------|--------------------------------------------------------------------|-------------------------------------------------------------------------------------------------------------------------------------------------------------------------|------------------------------------------------------------------------------------------------------------------------------------------------------------------------------------------------------------------------------|
| EPI_ISL_811127                                                                                                                                                                                                                                                                                                                                                                                                                                                                                                                                                                                                                                                                                                                                                                                                                                                                                                                                                                                                                                                                                                                                                                                                                                                                                                                                                                                                                                                                                                                                                                                                                                                                                                                                                                                                                                                                                                                                                                                                                                                                                                                                                                                                                                                                                                                                                                                 | Cantonal Hospital Winterthur                                       | Institute of Medical Virology, University of Zurich                                                                                                                     | Stefan Schmutz, Maryam Zaheri, Verena Kufner, Annette Audigé, Maria Grünberg, Kevin Steiner, Jon Huder, Cyril Shah, Riccarda Capaul, Guido Bloemberg, Jürg Böni, Michael Huber, Alexandra Trkola, Alexander Wepf, Urs Karrer |
| EPI_ISL_812249                                                                                                                                                                                                                                                                                                                                                                                                                                                                                                                                                                                                                                                                                                                                                                                                                                                                                                                                                                                                                                                                                                                                                                                                                                                                                                                                                                                                                                                                                                                                                                                                                                                                                                                                                                                                                                                                                                                                                                                                                                                                                                                                                                                                                                                                                                                                                                                 | Cantonal Hospital Baden                                            | Institute of Medical Virology, University of Zurich                                                                                                                     | Stefan Schmutz, Maryam Zaheri, Verena Kufner, Annette Audigé, Maria Grünberg, Kevin Steiner, Jon Huder, Cyril Shah, Riccarda Capaul, Guido Bloemberg, Jürg Böni, Michael Huber, Alexandra Trkola                             |
| EPI_ISL_812251, EPI_ISL_812252, EPI_ISL_812253, EPI_ISL_812254                                                                                                                                                                                                                                                                                                                                                                                                                                                                                                                                                                                                                                                                                                                                                                                                                                                                                                                                                                                                                                                                                                                                                                                                                                                                                                                                                                                                                                                                                                                                                                                                                                                                                                                                                                                                                                                                                                                                                                                                                                                                                                                                                                                                                                                                                                                                 | Kantonsarztamt Bern                                                | Institute of Medical Virology, University of Zurich                                                                                                                     | Stefan Schmutz, Maryam Zaheri, Verena Kufner, Annette Audigé, Maria Grünberg, Kevin Steiner, Jon Huder, Cyril Shah, Riccarda Capaul, Guido Bloemberg, Jürg Böni, Michael Huber, Alexandra Trkola                             |
| EPI_ISL_812255                                                                                                                                                                                                                                                                                                                                                                                                                                                                                                                                                                                                                                                                                                                                                                                                                                                                                                                                                                                                                                                                                                                                                                                                                                                                                                                                                                                                                                                                                                                                                                                                                                                                                                                                                                                                                                                                                                                                                                                                                                                                                                                                                                                                                                                                                                                                                                                 | Kantonsärztlicher Dienst Aargau                                    | Institute of Medical Virology, University of Zurich                                                                                                                     | Stefan Schmutz, Maryam Zaheri, Verena Kufner, Annette Audigé, Maria Grünberg, Kevin Steiner, Jon Huder, Cyril Shah, Riccarda Capaul, Guido Bloemberg, Jürg Böni, Michael Huber, Alexandra Trkola                             |
| EPI_ISL_812256                                                                                                                                                                                                                                                                                                                                                                                                                                                                                                                                                                                                                                                                                                                                                                                                                                                                                                                                                                                                                                                                                                                                                                                                                                                                                                                                                                                                                                                                                                                                                                                                                                                                                                                                                                                                                                                                                                                                                                                                                                                                                                                                                                                                                                                                                                                                                                                 | University Hospital Zürich                                         | Institute of Medical Virology, University of Zurich                                                                                                                     | Stefan Schmutz, Maryam Zaheri, Verena Kufner, Annette Audigé, Maria Grünberg, Kevin Steiner, Jon Huder, Cyril Shah, Riccarda Capaul, Guido Bloemberg, Jürg Böni, Michael Huber, Alexandra Trkola                             |
| EPI_ISL_812257                                                                                                                                                                                                                                                                                                                                                                                                                                                                                                                                                                                                                                                                                                                                                                                                                                                                                                                                                                                                                                                                                                                                                                                                                                                                                                                                                                                                                                                                                                                                                                                                                                                                                                                                                                                                                                                                                                                                                                                                                                                                                                                                                                                                                                                                                                                                                                                 | Analytica Medizinische Laboratorien AG                             | Institute of Medical Virology, University of Zurich                                                                                                                     | Stefan Schmutz, Maryam Zaheri, Verena Kufner, Annette Audigé, Maria Grünberg, Kevin Steiner, Jon Huder, Cyril Shah, Riccarda Capaul, Guido Bloemberg, Jürg Böni, Michael Huber, Alexandra Trkola                             |
| EPI_ISL_830648                                                                                                                                                                                                                                                                                                                                                                                                                                                                                                                                                                                                                                                                                                                                                                                                                                                                                                                                                                                                                                                                                                                                                                                                                                                                                                                                                                                                                                                                                                                                                                                                                                                                                                                                                                                                                                                                                                                                                                                                                                                                                                                                                                                                                                                                                                                                                                                 | Institute for Infectious Diseases, University of Bern, Switzerland | Institute for Infectious Diseases, University of Bern, Switzerland                                                                                                      | Michel C Koch, Christian Baumann, Miguel A Terrazos Miani, Cora Säggerer, Pascal Bittel, Stephen L Leib, Peter Keller, Franziska Suter-Riniker, Alban Ramette                                                                |
| EPI_ISL_847844, EPI_ISL_847847, EPI_ISL_847852, EPI_ISL_847853, EPI_ISL_847855, EPI_ISL_847856, EPI_ISL_847857, EPI_ISL_847858, EPI_ISL_847859, EPI_ISL_847860, EPI_ISL_847861, EPI_ISL_847862, EPI_ISL_847863, EPI_ISL_847864, EPI_ISL_847865, EPI_ISL_847866, EPI_ISL_847867, EPI_ISL_847868, EPI_ISL_847869, EPI_ISL_847870, EPI_ISL_847871, EPI_ISL_847872, EPI_ISL_847920, EPI_ISL_847929, EPI_ISL_847930, EPI_ISL_847931, EPI_ISL_847932, EPI_ISL_847933, EPI_ISL_847934, EPI_ISL_847935, EPI_ISL_847936, EPI_ISL_847940, EPI_ISL_847941, EPI_ISL_847942, EPI_ISL_847943, EPI_ISL_847944, EPI_ISL_847945, EPI_ISL_847946, EPI_ISL_847947, EPI_ISL_847948, EPI_ISL_847949, EPI_ISL_847950, EPI_ISL_847951, EPI_ISL_847952                                                                                                                                                                                                                                                                                                                                                                                                                                                                                                                                                                                                                                                                                                                                                                                                                                                                                                                                                                                                                                                                                                                                                                                                                                                                                                                                                                                                                                                                                                                                                                                                                                                                 | HUG, Laboratory of Virology and the Health2030 Genome Center       | Samuel Cordey, Ana Rita Goncalves, Laurent Kaiser, Lorenzo Cerutti, Henri Pegeot, Melyssa Elies, Keith Harshman, Ioannis Xenarios, Emmanouil Dermitzakis                |                                                                                                                                                                                                                              |
| see above                                                                                                                                                                                                                                                                                                                                                                                                                                                                                                                                                                                                                                                                                                                                                                                                                                                                                                                                                                                                                                                                                                                                                                                                                                                                                                                                                                                                                                                                                                                                                                                                                                                                                                                                                                                                                                                                                                                                                                                                                                                                                                                                                                                                                                                                                                                                                                                      | University Hospitals of Geneva, Laboratory of Virology             | HUG, Laboratory of Virology and Universitätsspital Basel                                                                                                                | Samuel Cordey, Ana Rita Goncalves, Laurent Kaiser, Tim Roloff, Madlen Stange, Helena MB Seth-Smith, Alfredo Mari, Karoline Leuzinger, Julia Bielicki, Manuel Battegay, Hans Hirsch, Adrian Egli                              |
| EPI_ISL_860240, EPI_ISL_860241, EPI_ISL_860242, EPI_ISL_860243, EPI_ISL_860244, EPI_ISL_860245, EPI_ISL_860246, EPI_ISL_860248, EPI_ISL_860249, EPI_ISL_860250, EPI_ISL_860251, EPI_ISL_860252, EPI_ISL_860253, EPI_ISL_860254, EPI_ISL_860255                                                                                                                                                                                                                                                                                                                                                                                                                                                                                                                                                                                                                                                                                                                                                                                                                                                                                                                                                                                                                                                                                                                                                                                                                                                                                                                                                                                                                                                                                                                                                                                                                                                                                                                                                                                                                                                                                                                                                                                                                                                                                                                                                 | University Hospitals of Geneva, Laboratory of Virology             | HUG, Laboratory of Virology and Universitätsspital Basel                                                                                                                | Samuel Cordey, Ana Rita Goncalves, Laurent Kaiser, Tim Roloff, Madlen Stange, Helena MB Seth-Smith, Alfredo Mari, Karoline Leuzinger, Julia Bielicki, Manuel Battegay, Hans Hirsch, Adrian Egli                              |
| see above                                                                                                                                                                                                                                                                                                                                                                                                                                                                                                                                                                                                                                                                                                                                                                                                                                                                                                                                                                                                                                                                                                                                                                                                                                                                                                                                                                                                                                                                                                                                                                                                                                                                                                                                                                                                                                                                                                                                                                                                                                                                                                                                                                                                                                                                                                                                                                                      | University Hospitals of Geneva, Laboratory of Virology             | HUG, Laboratory of Virology and Universitätsspital Basel                                                                                                                | Samuel Cordey, Ana Rita Goncalves, Laurent Kaiser, Tim Roloff, Madlen Stange, Helena MB Seth-Smith, Alfredo Mari, Karoline Leuzinger, Julia Bielicki, Manuel Battegay, Hans Hirsch, Adrian Egli                              |
| EPI_ISL_860719, EPI_ISL_860720, EPI_ISL_860721, EPI_ISL_860722, EPI_ISL_860723, EPI_ISL_860724, EPI_ISL_860725, EPI_ISL_860726                                                                                                                                                                                                                                                                                                                                                                                                                                                                                                                                                                                                                                                                                                                                                                                                                                                                                                                                                                                                                                                                                                                                                                                                                                                                                                                                                                                                                                                                                                                                                                                                                                                                                                                                                                                                                                                                                                                                                                                                                                                                                                                                                                                                                                                                 | Institute for Infectious Diseases, University of Bern, Switzerland | Institute for Infectious Diseases, University of Bern, Switzerland                                                                                                      | Michel C Koch, Christian Baumann, Miguel A Terrazos Miani, Cora Säggerer, Pascal Bittel, Stephen L Leib, Peter Keller, Franziska Suter-Riniker, Alban Ramette                                                                |
| EPI_ISL_864594, EPI_ISL_864595, EPI_ISL_864596, EPI_ISL_864597, EPI_ISL_864598, EPI_ISL_864599, EPI_ISL_864600, EPI_ISL_864601, EPI_ISL_864602, EPI_ISL_864603, EPI_ISL_864604, EPI_ISL_864605, EPI_ISL_864606, EPI_ISL_864607, EPI_ISL_864608, EPI_ISL_864609, EPI_ISL_864610, EPI_ISL_864611, EPI_ISL_864612, EPI_ISL_864613, EPI_ISL_864614, EPI_ISL_864615, EPI_ISL_864616, EPI_ISL_864617, EPI_ISL_864618, EPI_ISL_864619, EPI_ISL_864620, EPI_ISL_864621, EPI_ISL_864622, EPI_ISL_864623, EPI_ISL_864624, EPI_ISL_864625, EPI_ISL_864626, EPI_ISL_864627, EPI_ISL_864628, EPI_ISL_864629, EPI_ISL_864630, EPI_ISL_864631, EPI_ISL_864632, EPI_ISL_864633, EPI_ISL_864634, EPI_ISL_864635, EPI_ISL_864636, EPI_ISL_864637, EPI_ISL_864638, EPI_ISL_864639, EPI_ISL_864640, EPI_ISL_864641, EPI_ISL_864642, EPI_ISL_864643, EPI_ISL_864644, EPI_ISL_864645, EPI_ISL_864646, EPI_ISL_864647, EPI_ISL_864648, EPI_ISL_864649, EPI_ISL_864650, EPI_ISL_864651, EPI_ISL_864652, EPI_ISL_864653, EPI_ISL_864654, EPI_ISL_864655, EPI_ISL_864656, EPI_ISL_864657, EPI_ISL_864658, EPI_ISL_864659, EPI_ISL_864660, EPI_ISL_864661, EPI_ISL_864662, EPI_ISL_864663, EPI_ISL_864664, EPI_ISL_864665, EPI_ISL_864666, EPI_ISL_864667, EPI_ISL_864668, EPI_ISL_864669, EPI_ISL_864670, EPI_ISL_864671, EPI_ISL_864672, EPI_ISL_864673, EPI_ISL_864674, EPI_ISL_864675, EPI_ISL_864676, EPI_ISL_864677, EPI_ISL_864678, EPI_ISL_864679, EPI_ISL_864680, EPI_ISL_864681, EPI_ISL_864682, EPI_ISL_864683, EPI_ISL_864684, EPI_ISL_864685, EPI_ISL_864686, EPI_ISL_864687, EPI_ISL_864688, EPI_ISL_864689, EPI_ISL_864690, EPI_ISL_864691, EPI_ISL_864692, EPI_ISL_864693, EPI_ISL_864694, EPI_ISL_864695, EPI_ISL_864696, EPI_ISL_864697, EPI_ISL_864698, EPI_ISL_864699, EPI_ISL_864700, EPI_ISL_864701, EPI_ISL_864702, EPI_ISL_864703, EPI_ISL_864704, EPI_ISL_864705, EPI_ISL_864706, EPI_ISL_864707, EPI_ISL_864708, EPI_ISL_864709, EPI_ISL_864710, EPI_ISL_864711, EPI_ISL_864712, EPI_ISL_864713, EPI_ISL_864714, EPI_ISL_864715, EPI_ISL_864716, EPI_ISL_864717, EPI_ISL_864718, EPI_ISL_864719, EPI_ISL_864720, EPI_ISL_864721, EPI_ISL_864722, EPI_ISL_864723, EPI_ISL_864724, EPI_ISL_864725, EPI_ISL_864726, EPI_ISL_864727, EPI_ISL_864728, EPI_ISL_864729, EPI_ISL_864730, EPI_ISL_864731, EPI_ISL_864732, EPI_ISL_864733, EPI_ISL_864734, EPI_ISL_864735, EPI_ISL_864736, EPI_ISL_864737 | HUG, Laboratory of Virology and the Health2030 Genome Center       | Samuel Cordey, Ana Rita Goncalves, Laurent Kaiser, Lorenzo Cerutti, Henri Pegeot, Melyssa Elies, Deborah Penet, Keith Harshman, Ioannis Xenarios, Emmanouil Dermitzakis |                                                                                                                                                                                                                              |
| see above                                                                                                                                                                                                                                                                                                                                                                                                                                                                                                                                                                                                                                                                                                                                                                                                                                                                                                                                                                                                                                                                                                                                                                                                                                                                                                                                                                                                                                                                                                                                                                                                                                                                                                                                                                                                                                                                                                                                                                                                                                                                                                                                                                                                                                                                                                                                                                                      | University Hospitals of Geneva, Laboratory of Virology             | HUG, Laboratory of Virology and the Health2030 Genome Center                                                                                                            | Samuel Cordey, Ana Rita Goncalves, Laurent Kaiser, Lorenzo Cerutti, Henri Pegeot, Melyssa Elies, Deborah Penet, Keith Harshman, Ioannis Xenarios, Emmanouil Dermitzakis                                                      |
| EPI_ISL_896069                                                                                                                                                                                                                                                                                                                                                                                                                                                                                                                                                                                                                                                                                                                                                                                                                                                                                                                                                                                                                                                                                                                                                                                                                                                                                                                                                                                                                                                                                                                                                                                                                                                                                                                                                                                                                                                                                                                                                                                                                                                                                                                                                                                                                                                                                                                                                                                 | Labormedizinisches Zentrum Dr Risch                                | University Hospital Basel, Clinical Bacteriology                                                                                                                        | Tim Roloff, Madlen Stange, Helena MB Seth-Smith, Alfredo Mari, Karoline Leuzinger, Julia Bielicki, Nadia Wohlwend, Martin Risch, Lorenz Risch, Manuel Battegay, Hans Hirsch, Adrian Egli                                     |
| EPI_ISL_896070                                                                                                                                                                                                                                                                                                                                                                                                                                                                                                                                                                                                                                                                                                                                                                                                                                                                                                                                                                                                                                                                                                                                                                                                                                                                                                                                                                                                                                                                                                                                                                                                                                                                                                                                                                                                                                                                                                                                                                                                                                                                                                                                                                                                                                                                                                                                                                                 | Rothen Medizinische Laboratorien AG                                | University Hospital Basel, Clinical Bacteriology                                                                                                                        | Tim Roloff, Madlen Stange, Helena MB Seth-Smith, Alfredo Mari, Karoline Leuzinger, Julia Bielicki, Ingrid Steffen, Manuel Battegay, Hans Hirsch, Adrian Egli                                                                 |
| EPI_ISL_896071, EPI_ISL_896073                                                                                                                                                                                                                                                                                                                                                                                                                                                                                                                                                                                                                                                                                                                                                                                                                                                                                                                                                                                                                                                                                                                                                                                                                                                                                                                                                                                                                                                                                                                                                                                                                                                                                                                                                                                                                                                                                                                                                                                                                                                                                                                                                                                                                                                                                                                                                                 | Labormedizinisches Zentrum Dr Risch                                | University Hospital Basel, Clinical Bacteriology                                                                                                                        | Tim Roloff, Madlen Stange, Helena MB Seth-Smith, Alfredo Mari, Karoline Leuzinger, Julia Bielicki, Nadia Wohlwend, Martin Risch, Lorenz Risch, Manuel Battegay, Hans Hirsch, Adrian Egli                                     |
| EPI_ISL_896074, EPI_ISL_896075, EPI_ISL_896076                                                                                                                                                                                                                                                                                                                                                                                                                                                                                                                                                                                                                                                                                                                                                                                                                                                                                                                                                                                                                                                                                                                                                                                                                                                                                                                                                                                                                                                                                                                                                                                                                                                                                                                                                                                                                                                                                                                                                                                                                                                                                                                                                                                                                                                                                                                                                 | Viollier AG                                                        | University Hospital Basel, Clinical Bacteriology                                                                                                                        | Tim Roloff, Madlen Stange, Helena MB Seth-Smith, Alfredo Mari, Karoline Leuzinger, Julia Bielicki, Christiane Beckmann, Manuel Battegay, Hans Hirsch, Adrian Egli                                                            |
| EPI_ISL_896077                                                                                                                                                                                                                                                                                                                                                                                                                                                                                                                                                                                                                                                                                                                                                                                                                                                                                                                                                                                                                                                                                                                                                                                                                                                                                                                                                                                                                                                                                                                                                                                                                                                                                                                                                                                                                                                                                                                                                                                                                                                                                                                                                                                                                                                                                                                                                                                 | Labormedizinisches Zentrum Dr Risch                                | University Hospital Basel, Clinical Bacteriology                                                                                                                        | Tim Roloff, Madlen Stange, Helena MB Seth-Smith, Alfredo Mari, Karoline Leuzinger, Julia Bielicki, Nadia Wohlwend, Martin Risch, Lorenz Risch, Manuel Battegay, Hans Hirsch, Adrian Egli                                     |
| EPI_ISL_896078                                                                                                                                                                                                                                                                                                                                                                                                                                                                                                                                                                                                                                                                                                                                                                                                                                                                                                                                                                                                                                                                                                                                                                                                                                                                                                                                                                                                                                                                                                                                                                                                                                                                                                                                                                                                                                                                                                                                                                                                                                                                                                                                                                                                                                                                                                                                                                                 | Viollier AG                                                        | University Hospital Basel, Clinical Bacteriology                                                                                                                        | Tim Roloff, Madlen Stange, Helena MB Seth-Smith, Alfredo Mari, Karoline Leuzinger, Julia Bielicki, Christiane Beckmann, Manuel Battegay, Hans Hirsch, Adrian Egli                                                            |
| EPI_ISL_896079, EPI_ISL_896080, EPI_ISL_896081, EPI_ISL_896082, EPI_ISL_896083, EPI_ISL_896084                                                                                                                                                                                                                                                                                                                                                                                                                                                                                                                                                                                                                                                                                                                                                                                                                                                                                                                                                                                                                                                                                                                                                                                                                                                                                                                                                                                                                                                                                                                                                                                                                                                                                                                                                                                                                                                                                                                                                                                                                                                                                                                                                                                                                                                                                                 | Labormedizinisches Zentrum Dr Risch                                | University Hospital Basel, Clinical Bacteriology                                                                                                                        | Tim Roloff, Madlen Stange, Helena MB Seth-Smith, Alfredo Mari, Karoline Leuzinger, Julia Bielicki, Nadia Wohlwend, Martin Risch, Lorenz Risch, Manuel Battegay, Hans Hirsch, Adrian Egli                                     |
| EPI_ISL_896085, EPI_ISL_896086                                                                                                                                                                                                                                                                                                                                                                                                                                                                                                                                                                                                                                                                                                                                                                                                                                                                                                                                                                                                                                                                                                                                                                                                                                                                                                                                                                                                                                                                                                                                                                                                                                                                                                                                                                                                                                                                                                                                                                                                                                                                                                                                                                                                                                                                                                                                                                 | Viollier AG                                                        | University Hospital Basel, Clinical Bacteriology                                                                                                                        | Tim Roloff, Madlen Stange, Helena MB Seth-Smith, Alfredo Mari, Karoline Leuzinger, Julia Bielicki, Christiane Beckmann, Manuel Battegay, Hans Hirsch, Adrian Egli                                                            |
| EPI_ISL_896089                                                                                                                                                                                                                                                                                                                                                                                                                                                                                                                                                                                                                                                                                                                                                                                                                                                                                                                                                                                                                                                                                                                                                                                                                                                                                                                                                                                                                                                                                                                                                                                                                                                                                                                                                                                                                                                                                                                                                                                                                                                                                                                                                                                                                                                                                                                                                                                 | Rothen Medizinische Laboratorien AG                                | University Hospital Basel, Clinical Bacteriology                                                                                                                        | Tim Roloff, Madlen Stange, Helena MB Seth-Smith, Alfredo Mari, Karoline Leuzinger, Julia Bielicki, Ingrid Steffen, Manuel Battegay, Hans Hirsch, Adrian Egli                                                                 |
| EPI_ISL_896090                                                                                                                                                                                                                                                                                                                                                                                                                                                                                                                                                                                                                                                                                                                                                                                                                                                                                                                                                                                                                                                                                                                                                                                                                                                                                                                                                                                                                                                                                                                                                                                                                                                                                                                                                                                                                                                                                                                                                                                                                                                                                                                                                                                                                                                                                                                                                                                 | Labormedizinisches Zentrum Dr Risch                                | University Hospital Basel, Clinical Bacteriology                                                                                                                        | Tim Roloff, Madlen Stange, Helena MB Seth-Smith, Alfredo Mari, Karoline Leuzinger, Julia Bielicki, Nadia Wohlwend, Martin Risch, Lorenz Risch, Manuel Battegay, Hans Hirsch, Adrian Egli                                     |
| EPI_ISL_896091                                                                                                                                                                                                                                                                                                                                                                                                                                                                                                                                                                                                                                                                                                                                                                                                                                                                                                                                                                                                                                                                                                                                                                                                                                                                                                                                                                                                                                                                                                                                                                                                                                                                                                                                                                                                                                                                                                                                                                                                                                                                                                                                                                                                                                                                                                                                                                                 | Kantonsspital Aarau, Institut für Labormedizin                     | University Hospital Basel, Clinical Bacteriology                                                                                                                        | Tim Roloff, Madlen Stange, Helena MB Seth-Smith, Alfredo Mari, Karoline Leuzinger, Julia Bielicki, Michael Oberle, Manuel Battegay, Hans Hirsch, Adrian Egli                                                                 |
| EPI_ISL_896092, EPI_ISL_896096, EPI_ISL_896097                                                                                                                                                                                                                                                                                                                                                                                                                                                                                                                                                                                                                                                                                                                                                                                                                                                                                                                                                                                                                                                                                                                                                                                                                                                                                                                                                                                                                                                                                                                                                                                                                                                                                                                                                                                                                                                                                                                                                                                                                                                                                                                                                                                                                                                                                                                                                 | Labormedizinisches Zentrum Dr Risch                                | University Hospital Basel, Clinical Bacteriology                                                                                                                        | Tim Roloff, Madlen Stange, Helena MB Seth-Smith, Alfredo Mari, Karoline Leuzinger, Julia Bielicki, Nadia Wohlwend, Martin Risch, Lorenz Risch, Manuel Battegay, Hans Hirsch, Adrian Egli                                     |
| EPI_ISL_896098                                                                                                                                                                                                                                                                                                                                                                                                                                                                                                                                                                                                                                                                                                                                                                                                                                                                                                                                                                                                                                                                                                                                                                                                                                                                                                                                                                                                                                                                                                                                                                                                                                                                                                                                                                                                                                                                                                                                                                                                                                                                                                                                                                                                                                                                                                                                                                                 | Rothen Medizinische Laboratorien AG                                | University Hospital Basel, Clinical Bacteriology                                                                                                                        | Tim Roloff, Madlen Stange, Helena MB Seth-Smith, Alfredo Mari, Karoline Leuzinger, Julia Bielicki, Ingrid Steffen, Manuel Battegay, Hans Hirsch, Adrian Egli                                                                 |
| EPI_ISL_896099                                                                                                                                                                                                                                                                                                                                                                                                                                                                                                                                                                                                                                                                                                                                                                                                                                                                                                                                                                                                                                                                                                                                                                                                                                                                                                                                                                                                                                                                                                                                                                                                                                                                                                                                                                                                                                                                                                                                                                                                                                                                                                                                                                                                                                                                                                                                                                                 | Labormedizinisches Zentrum Dr Risch                                | University Hospital Basel, Clinical Bacteriology                                                                                                                        | Tim Roloff, Madlen Stange, Helena MB Seth-Smith, Alfredo Mari, Karoline Leuzinger, Julia Bielicki, Nadia Wohlwend, Martin Risch, Lorenz Risch, Manuel Battegay, Hans Hirsch, Adrian Egli                                     |
| EPI_ISL_896100                                                                                                                                                                                                                                                                                                                                                                                                                                                                                                                                                                                                                                                                                                                                                                                                                                                                                                                                                                                                                                                                                                                                                                                                                                                                                                                                                                                                                                                                                                                                                                                                                                                                                                                                                                                                                                                                                                                                                                                                                                                                                                                                                                                                                                                                                                                                                                                 | Viollier AG                                                        | University Hospital Basel, Clinical Bacteriology                                                                                                                        | Tim Roloff, Madlen Stange, Helena MB Seth-Smith, Alfredo Mari, Karoline Leuzinger, Julia Bielicki, Christiane Beckmann, Manuel Battegay, Hans Hirsch, Adrian Egli                                                            |
| EPI_ISL_896106, EPI_ISL_896108                                                                                                                                                                                                                                                                                                                                                                                                                                                                                                                                                                                                                                                                                                                                                                                                                                                                                                                                                                                                                                                                                                                                                                                                                                                                                                                                                                                                                                                                                                                                                                                                                                                                                                                                                                                                                                                                                                                                                                                                                                                                                                                                                                                                                                                                                                                                                                 | Labormedizinisches Zentrum Dr Risch                                | University Hospital Basel, Clinical Bacteriology                                                                                                                        | Tim Roloff, Madlen Stange, Helena MB Seth-Smith, Alfredo Mari, Karoline Leuzinger, Julia Bielicki, Nadia Wohlwend, Martin Risch, Lorenz Risch, Manuel Battegay, Hans Hirsch, Adrian Egli                                     |
| EPI_ISL_896109                                                                                                                                                                                                                                                                                                                                                                                                                                                                                                                                                                                                                                                                                                                                                                                                                                                                                                                                                                                                                                                                                                                                                                                                                                                                                                                                                                                                                                                                                                                                                                                                                                                                                                                                                                                                                                                                                                                                                                                                                                                                                                                                                                                                                                                                                                                                                                                 | Abklärungs- und _Teststation BL                                    | University Hospital Basel, Clinical Bacteriology                                                                                                                        | Tim Roloff, Madlen Stange, Helena MB Seth-Smith, Alfredo Mari, Karoline Leuzinger, Julia Bielicki, Samuel Erny, Thomas Goetz, Juerg Sommer, Manuel Battegay, Hans Hirsch, Adrian Egli                                        |
| EPI_ISL_896110, EPI_ISL_896111                                                                                                                                                                                                                                                                                                                                                                                                                                                                                                                                                                                                                                                                                                                                                                                                                                                                                                                                                                                                                                                                                                                                                                                                                                                                                                                                                                                                                                                                                                                                                                                                                                                                                                                                                                                                                                                                                                                                                                                                                                                                                                                                                                                                                                                                                                                                                                 | Viollier AG                                                        | University Hospital Basel, Clinical Bacteriology                                                                                                                        | Tim Roloff, Madlen Stange, Helena MB Seth-Smith, Alfredo Mari, Karoline Leuzinger, Julia Bielicki, Christiane Beckmann, Manuel Battegay, Hans Hirsch, Adrian Egli                                                            |









|                                                                                                                                                                                                                                                                                                                                                                                                                                                                                                                                                                                                                                                                                                                                                                                                                                                                                                                                                                                                                                                                                                                                                                                                                                                                                                                                                                                                                                                                                                                                                                                                                                                                                                                                                                                                                                                                                                                                                                                                                                                                                                                                                                                                                                                                                                                                                                                                                                                                                                                                                                                                                                                                                                                                                                                                                                                                                                                                                                                                                                                                                                                                                                                                                                                                                                                                                                                                                                                                                                                                                                                                                                                                                                                                                                                                                                                                                                                                                                                                                                                                                                                                                                                                                                                                                                                                                                                                                                                                                                                                                                                                                                                                                                                                                                                                                                                                                                                                                                                                                                                                                                                                                                                                                                                                                                                                                                                                                                                                                                                                                                                                                                                                                                                                                                                                                                                                                                                                                                                                                                                                                                                                                                                                                                                                                                                                                                                                                                                                                                                                                                                                                                                                                                                                                                                                                                                                                                                                                                                                                                                                                                                                                                                                                                                                                                                                                                                                                                                                                |                                                        |                                                                                                                                        |                                                                                                                                                                                                                                                                                                                                                                       |                                                                                                                                                                         |
|--------------------------------------------------------------------------------------------------------------------------------------------------------------------------------------------------------------------------------------------------------------------------------------------------------------------------------------------------------------------------------------------------------------------------------------------------------------------------------------------------------------------------------------------------------------------------------------------------------------------------------------------------------------------------------------------------------------------------------------------------------------------------------------------------------------------------------------------------------------------------------------------------------------------------------------------------------------------------------------------------------------------------------------------------------------------------------------------------------------------------------------------------------------------------------------------------------------------------------------------------------------------------------------------------------------------------------------------------------------------------------------------------------------------------------------------------------------------------------------------------------------------------------------------------------------------------------------------------------------------------------------------------------------------------------------------------------------------------------------------------------------------------------------------------------------------------------------------------------------------------------------------------------------------------------------------------------------------------------------------------------------------------------------------------------------------------------------------------------------------------------------------------------------------------------------------------------------------------------------------------------------------------------------------------------------------------------------------------------------------------------------------------------------------------------------------------------------------------------------------------------------------------------------------------------------------------------------------------------------------------------------------------------------------------------------------------------------------------------------------------------------------------------------------------------------------------------------------------------------------------------------------------------------------------------------------------------------------------------------------------------------------------------------------------------------------------------------------------------------------------------------------------------------------------------------------------------------------------------------------------------------------------------------------------------------------------------------------------------------------------------------------------------------------------------------------------------------------------------------------------------------------------------------------------------------------------------------------------------------------------------------------------------------------------------------------------------------------------------------------------------------------------------------------------------------------------------------------------------------------------------------------------------------------------------------------------------------------------------------------------------------------------------------------------------------------------------------------------------------------------------------------------------------------------------------------------------------------------------------------------------------------------------------------------------------------------------------------------------------------------------------------------------------------------------------------------------------------------------------------------------------------------------------------------------------------------------------------------------------------------------------------------------------------------------------------------------------------------------------------------------------------------------------------------------------------------------------------------------------------------------------------------------------------------------------------------------------------------------------------------------------------------------------------------------------------------------------------------------------------------------------------------------------------------------------------------------------------------------------------------------------------------------------------------------------------------------------------------------------------------------------------------------------------------------------------------------------------------------------------------------------------------------------------------------------------------------------------------------------------------------------------------------------------------------------------------------------------------------------------------------------------------------------------------------------------------------------------------------------------------------------------------------------------------------------------------------------------------------------------------------------------------------------------------------------------------------------------------------------------------------------------------------------------------------------------------------------------------------------------------------------------------------------------------------------------------------------------------------------------------------------------------------------------------------------------------------------------------------------------------------------------------------------------------------------------------------------------------------------------------------------------------------------------------------------------------------------------------------------------------------------------------------------------------------------------------------------------------------------------------------------------------------------------------------------------------------------------------------------------------------------------------------------------------------------------------------------------------------------------------------------------------------------------------------------------------------------------------------------------------------------------------------------------------------------------------------------------------------------------------------------------------------------------------------------------------------------------------------|--------------------------------------------------------|----------------------------------------------------------------------------------------------------------------------------------------|-----------------------------------------------------------------------------------------------------------------------------------------------------------------------------------------------------------------------------------------------------------------------------------------------------------------------------------------------------------------------|-------------------------------------------------------------------------------------------------------------------------------------------------------------------------|
| see above                                                                                                                                                                                                                                                                                                                                                                                                                                                                                                                                                                                                                                                                                                                                                                                                                                                                                                                                                                                                                                                                                                                                                                                                                                                                                                                                                                                                                                                                                                                                                                                                                                                                                                                                                                                                                                                                                                                                                                                                                                                                                                                                                                                                                                                                                                                                                                                                                                                                                                                                                                                                                                                                                                                                                                                                                                                                                                                                                                                                                                                                                                                                                                                                                                                                                                                                                                                                                                                                                                                                                                                                                                                                                                                                                                                                                                                                                                                                                                                                                                                                                                                                                                                                                                                                                                                                                                                                                                                                                                                                                                                                                                                                                                                                                                                                                                                                                                                                                                                                                                                                                                                                                                                                                                                                                                                                                                                                                                                                                                                                                                                                                                                                                                                                                                                                                                                                                                                                                                                                                                                                                                                                                                                                                                                                                                                                                                                                                                                                                                                                                                                                                                                                                                                                                                                                                                                                                                                                                                                                                                                                                                                                                                                                                                                                                                                                                                                                                                                                      | Viollier AG                                            | Department of Biosystems Science and Engineering, ETH Zürich                                                                           | Chaoan Chen, Sarah Nadeau, Ivan Topolsky, Emmanouil Dermitzakis, Keith Harshman, Ioannis Xenarios, Henri Pegeot, Lorenzo Cerutti, Deborah Penet, Philipp Jablonski, Lara Fuhrmann, David Dreifuss, Katharina Jahn, Christiane Beckmann, Maurice Redondo, Olivier Kobel, Christoph Noppen, Sophie Seidel, Noemie Santamaria de Souza, Niko Beerenwinkel, Tanja Stadler |                                                                                                                                                                         |
| EPI_ISL_899907, EPI_ISL_899908, EPI_ISL_899909, EPI_ISL_899910, EPI_ISL_899911, EPI_ISL_899912, EPI_ISL_899913, EPI_ISL_899914, EPI_ISL_899915, EPI_ISL_899916                                                                                                                                                                                                                                                                                                                                                                                                                                                                                                                                                                                                                                                                                                                                                                                                                                                                                                                                                                                                                                                                                                                                                                                                                                                                                                                                                                                                                                                                                                                                                                                                                                                                                                                                                                                                                                                                                                                                                                                                                                                                                                                                                                                                                                                                                                                                                                                                                                                                                                                                                                                                                                                                                                                                                                                                                                                                                                                                                                                                                                                                                                                                                                                                                                                                                                                                                                                                                                                                                                                                                                                                                                                                                                                                                                                                                                                                                                                                                                                                                                                                                                                                                                                                                                                                                                                                                                                                                                                                                                                                                                                                                                                                                                                                                                                                                                                                                                                                                                                                                                                                                                                                                                                                                                                                                                                                                                                                                                                                                                                                                                                                                                                                                                                                                                                                                                                                                                                                                                                                                                                                                                                                                                                                                                                                                                                                                                                                                                                                                                                                                                                                                                                                                                                                                                                                                                                                                                                                                                                                                                                                                                                                                                                                                                                                                                                 | Viollier AG                                            | Department of Biosystems Science and Engineering, ETH Zürich                                                                           | Christian Beisel, Sarah Nadeau, Chaoan Chen, Ivan Topolsky, Philipp Jablonski, Lara Fuhrmann, David Dreifuss, Katharina Jahn, Tobias Schär, Ina Nissen, Natascha Santacroce, Elodie Burcklen, Christiane Beckmann, Maurice Redondo, Olivier Kobel, Christoph Noppen, Sophie Seidel, Noemie Santamaria de Souza, Niko Beerenwinkel, Tanja Stadler                      |                                                                                                                                                                         |
| EPI_ISL_899917, EPI_ISL_899918, EPI_ISL_899919, EPI_ISL_899920, EPI_ISL_899922                                                                                                                                                                                                                                                                                                                                                                                                                                                                                                                                                                                                                                                                                                                                                                                                                                                                                                                                                                                                                                                                                                                                                                                                                                                                                                                                                                                                                                                                                                                                                                                                                                                                                                                                                                                                                                                                                                                                                                                                                                                                                                                                                                                                                                                                                                                                                                                                                                                                                                                                                                                                                                                                                                                                                                                                                                                                                                                                                                                                                                                                                                                                                                                                                                                                                                                                                                                                                                                                                                                                                                                                                                                                                                                                                                                                                                                                                                                                                                                                                                                                                                                                                                                                                                                                                                                                                                                                                                                                                                                                                                                                                                                                                                                                                                                                                                                                                                                                                                                                                                                                                                                                                                                                                                                                                                                                                                                                                                                                                                                                                                                                                                                                                                                                                                                                                                                                                                                                                                                                                                                                                                                                                                                                                                                                                                                                                                                                                                                                                                                                                                                                                                                                                                                                                                                                                                                                                                                                                                                                                                                                                                                                                                                                                                                                                                                                                                                                 | Viollier AG                                            | Department of Biosystems Science and Engineering, ETH Zürich                                                                           | Chaoan Chen, Sarah Nadeau, Ivan Topolsky, Emmanouil Dermitzakis, Keith Harshman, Ioannis Xenarios, Henri Pegeot, Lorenzo Cerutti, Deborah Penet, Philipp Jablonski, Lara Fuhrmann, David Dreifuss, Katharina Jahn, Christiane Beckmann, Maurice Redondo, Olivier Kobel, Christoph Noppen, Sophie Seidel, Noemie Santamaria de Souza, Niko Beerenwinkel, Tanja Stadler |                                                                                                                                                                         |
| EPI_ISL_899974, EPI_ISL_899975, EPI_ISL_899976, EPI_ISL_899977, EPI_ISL_899978, EPI_ISL_899979, EPI_ISL_899980, EPI_ISL_899981, EPI_ISL_899982, EPI_ISL_899983, EPI_ISL_899984, EPI_ISL_899985, EPI_ISL_899986, EPI_ISL_899987, EPI_ISL_899988, EPI_ISL_899989, EPI_ISL_899990, EPI_ISL_899991, EPI_ISL_899992, EPI_ISL_899993, EPI_ISL_899994, EPI_ISL_899995, EPI_ISL_899996, EPI_ISL_899997, EPI_ISL_899998, EPI_ISL_899999, EPI_ISL_900000, EPI_ISL_900001, EPI_ISL_900002, EPI_ISL_900003, EPI_ISL_900004, EPI_ISL_900005, EPI_ISL_900006, EPI_ISL_900007, EPI_ISL_900008, EPI_ISL_900009, EPI_ISL_900010, EPI_ISL_900011, EPI_ISL_900012, EPI_ISL_900013, EPI_ISL_900014, EPI_ISL_900015, EPI_ISL_900016, EPI_ISL_900017, EPI_ISL_900018, EPI_ISL_900019, EPI_ISL_900020, EPI_ISL_900021, EPI_ISL_900022                                                                                                                                                                                                                                                                                                                                                                                                                                                                                                                                                                                                                                                                                                                                                                                                                                                                                                                                                                                                                                                                                                                                                                                                                                                                                                                                                                                                                                                                                                                                                                                                                                                                                                                                                                                                                                                                                                                                                                                                                                                                                                                                                                                                                                                                                                                                                                                                                                                                                                                                                                                                                                                                                                                                                                                                                                                                                                                                                                                                                                                                                                                                                                                                                                                                                                                                                                                                                                                                                                                                                                                                                                                                                                                                                                                                                                                                                                                                                                                                                                                                                                                                                                                                                                                                                                                                                                                                                                                                                                                                                                                                                                                                                                                                                                                                                                                                                                                                                                                                                                                                                                                                                                                                                                                                                                                                                                                                                                                                                                                                                                                                                                                                                                                                                                                                                                                                                                                                                                                                                                                                                                                                                                                                                                                                                                                                                                                                                                                                                                                                                                                                                                                                 | Viollier AG                                            | Department of Biosystems Science and Engineering, ETH Zürich                                                                           | Christian Beisel, Sarah Nadeau, Chaoan Chen, Ivan Topolsky, Philipp Jablonski, Lara Fuhrmann, David Dreifuss, Katharina Jahn, Tobias Schär, Ina Nissen, Natascha Santacroce, Elodie Burcklen, Christiane Beckmann, Maurice Redondo, Olivier Kobel, Christoph Noppen, Sophie Seidel, Noemie Santamaria de Souza, Niko Beerenwinkel, Tanja Stadler                      |                                                                                                                                                                         |
| see above                                                                                                                                                                                                                                                                                                                                                                                                                                                                                                                                                                                                                                                                                                                                                                                                                                                                                                                                                                                                                                                                                                                                                                                                                                                                                                                                                                                                                                                                                                                                                                                                                                                                                                                                                                                                                                                                                                                                                                                                                                                                                                                                                                                                                                                                                                                                                                                                                                                                                                                                                                                                                                                                                                                                                                                                                                                                                                                                                                                                                                                                                                                                                                                                                                                                                                                                                                                                                                                                                                                                                                                                                                                                                                                                                                                                                                                                                                                                                                                                                                                                                                                                                                                                                                                                                                                                                                                                                                                                                                                                                                                                                                                                                                                                                                                                                                                                                                                                                                                                                                                                                                                                                                                                                                                                                                                                                                                                                                                                                                                                                                                                                                                                                                                                                                                                                                                                                                                                                                                                                                                                                                                                                                                                                                                                                                                                                                                                                                                                                                                                                                                                                                                                                                                                                                                                                                                                                                                                                                                                                                                                                                                                                                                                                                                                                                                                                                                                                                                                      | Viollier AG                                            | Department of Biosystems Science and Engineering, ETH Zürich                                                                           | Christian Beisel, Sarah Nadeau, Chaoan Chen, Ivan Topolsky, Philipp Jablonski, Lara Fuhrmann, David Dreifuss, Katharina Jahn, Tobias Schär, Ina Nissen, Natascha Santacroce, Elodie Burcklen, Christiane Beckmann, Maurice Redondo, Olivier Kobel, Christoph Noppen, Sophie Seidel, Noemie Santamaria de Souza, Niko Beerenwinkel, Tanja Stadler                      |                                                                                                                                                                         |
| EPI_ISL_900023, EPI_ISL_900024, EPI_ISL_900025, EPI_ISL_900026, EPI_ISL_900027, EPI_ISL_900028, EPI_ISL_900029, EPI_ISL_900030, EPI_ISL_900031, EPI_ISL_900032, EPI_ISL_900033, EPI_ISL_900034, EPI_ISL_900035, EPI_ISL_900036, EPI_ISL_900037, EPI_ISL_900038, EPI_ISL_900039, EPI_ISL_900040, EPI_ISL_900041, EPI_ISL_900042, EPI_ISL_900043, EPI_ISL_900044, EPI_ISL_900045, EPI_ISL_900046, EPI_ISL_900047, EPI_ISL_900048, EPI_ISL_900049, EPI_ISL_900050, EPI_ISL_900051                                                                                                                                                                                                                                                                                                                                                                                                                                                                                                                                                                                                                                                                                                                                                                                                                                                                                                                                                                                                                                                                                                                                                                                                                                                                                                                                                                                                                                                                                                                                                                                                                                                                                                                                                                                                                                                                                                                                                                                                                                                                                                                                                                                                                                                                                                                                                                                                                                                                                                                                                                                                                                                                                                                                                                                                                                                                                                                                                                                                                                                                                                                                                                                                                                                                                                                                                                                                                                                                                                                                                                                                                                                                                                                                                                                                                                                                                                                                                                                                                                                                                                                                                                                                                                                                                                                                                                                                                                                                                                                                                                                                                                                                                                                                                                                                                                                                                                                                                                                                                                                                                                                                                                                                                                                                                                                                                                                                                                                                                                                                                                                                                                                                                                                                                                                                                                                                                                                                                                                                                                                                                                                                                                                                                                                                                                                                                                                                                                                                                                                                                                                                                                                                                                                                                                                                                                                                                                                                                                                                 | Viollier AG                                            | Department of Biosystems Science and Engineering, ETH Zürich                                                                           | Chaoan Chen, Sarah Nadeau, Ivan Topolsky, Emmanouil Dermitzakis, Keith Harshman, Ioannis Xenarios, Henri Pegeot, Lorenzo Cerutti, Deborah Penet, Philipp Jablonski, Lara Fuhrmann, David Dreifuss, Katharina Jahn, Christiane Beckmann, Maurice Redondo, Olivier Kobel, Christoph Noppen, Sophie Seidel, Noemie Santamaria de Souza, Niko Beerenwinkel, Tanja Stadler |                                                                                                                                                                         |
| EPI_ISL_913436, EPI_ISL_913437, EPI_ISL_913438, EPI_ISL_913439, EPI_ISL_913440, EPI_ISL_913441, EPI_ISL_913442, EPI_ISL_913443, EPI_ISL_913444, EPI_ISL_913445, EPI_ISL_918164                                                                                                                                                                                                                                                                                                                                                                                                                                                                                                                                                                                                                                                                                                                                                                                                                                                                                                                                                                                                                                                                                                                                                                                                                                                                                                                                                                                                                                                                                                                                                                                                                                                                                                                                                                                                                                                                                                                                                                                                                                                                                                                                                                                                                                                                                                                                                                                                                                                                                                                                                                                                                                                                                                                                                                                                                                                                                                                                                                                                                                                                                                                                                                                                                                                                                                                                                                                                                                                                                                                                                                                                                                                                                                                                                                                                                                                                                                                                                                                                                                                                                                                                                                                                                                                                                                                                                                                                                                                                                                                                                                                                                                                                                                                                                                                                                                                                                                                                                                                                                                                                                                                                                                                                                                                                                                                                                                                                                                                                                                                                                                                                                                                                                                                                                                                                                                                                                                                                                                                                                                                                                                                                                                                                                                                                                                                                                                                                                                                                                                                                                                                                                                                                                                                                                                                                                                                                                                                                                                                                                                                                                                                                                                                                                                                                                                 | see above                                              | Institute for Infectious Diseases, University of Bern, Switzerland                                                                     | Institute for Infectious Diseases, University of Bern, Switzerland                                                                                                                                                                                                                                                                                                    | Michel C Koch, Christian Baumann, Miguel A Terrazos Miani, Cora Sägesser, Pascal Bittel, Stephen L Leib, Peter Keller, Franziska Suter-Riniker, Alban Ramette           |
| EPI_ISL_934978, EPI_ISL_934979, EPI_ISL_934980, EPI_ISL_934981, EPI_ISL_934982, EPI_ISL_934983, EPI_ISL_934984, EPI_ISL_934985, EPI_ISL_934986, EPI_ISL_934988, EPI_ISL_934989, EPI_ISL_934990, EPI_ISL_934991, EPI_ISL_934992, EPI_ISL_934993, EPI_ISL_934994, EPI_ISL_934995, EPI_ISL_935000, EPI_ISL_935001, EPI_ISL_935002, EPI_ISL_935003, EPI_ISL_935004, EPI_ISL_935005, EPI_ISL_935006, EPI_ISL_935007, EPI_ISL_935008, EPI_ISL_935009, EPI_ISL_935010, EPI_ISL_935011                                                                                                                                                                                                                                                                                                                                                                                                                                                                                                                                                                                                                                                                                                                                                                                                                                                                                                                                                                                                                                                                                                                                                                                                                                                                                                                                                                                                                                                                                                                                                                                                                                                                                                                                                                                                                                                                                                                                                                                                                                                                                                                                                                                                                                                                                                                                                                                                                                                                                                                                                                                                                                                                                                                                                                                                                                                                                                                                                                                                                                                                                                                                                                                                                                                                                                                                                                                                                                                                                                                                                                                                                                                                                                                                                                                                                                                                                                                                                                                                                                                                                                                                                                                                                                                                                                                                                                                                                                                                                                                                                                                                                                                                                                                                                                                                                                                                                                                                                                                                                                                                                                                                                                                                                                                                                                                                                                                                                                                                                                                                                                                                                                                                                                                                                                                                                                                                                                                                                                                                                                                                                                                                                                                                                                                                                                                                                                                                                                                                                                                                                                                                                                                                                                                                                                                                                                                                                                                                                                                                 | see above                                              | ADMED Microbiologie                                                                                                                    | Genomics and Transcriptomics, Philip Morris International                                                                                                                                                                                                                                                                                                             | Reto Lienhard, Marie-Lise Tritten, Emmanuel Guedj, Nicolas Sierro, Rémi Dulize, David Bornard, Mehdi Auberson, Maxime Berthouzou, Nikolai Ivanov, Manuel Peitsch        |
| EPI_ISL_940068, EPI_ISL_940069, EPI_ISL_940070, EPI_ISL_940071, EPI_ISL_940072, EPI_ISL_940073, EPI_ISL_940074                                                                                                                                                                                                                                                                                                                                                                                                                                                                                                                                                                                                                                                                                                                                                                                                                                                                                                                                                                                                                                                                                                                                                                                                                                                                                                                                                                                                                                                                                                                                                                                                                                                                                                                                                                                                                                                                                                                                                                                                                                                                                                                                                                                                                                                                                                                                                                                                                                                                                                                                                                                                                                                                                                                                                                                                                                                                                                                                                                                                                                                                                                                                                                                                                                                                                                                                                                                                                                                                                                                                                                                                                                                                                                                                                                                                                                                                                                                                                                                                                                                                                                                                                                                                                                                                                                                                                                                                                                                                                                                                                                                                                                                                                                                                                                                                                                                                                                                                                                                                                                                                                                                                                                                                                                                                                                                                                                                                                                                                                                                                                                                                                                                                                                                                                                                                                                                                                                                                                                                                                                                                                                                                                                                                                                                                                                                                                                                                                                                                                                                                                                                                                                                                                                                                                                                                                                                                                                                                                                                                                                                                                                                                                                                                                                                                                                                                                                 | University Hospitals of Geneva, Laboratory of Virology | HUG, Laboratory of Virology and the Health2030 Genome Center                                                                           | Samuel Cordey, Ana Rita Goncalves, Laurent Kaiser, Lorenzo Cerutti, Henri Pegeot, Melyssa Elies, Deborah Penet, Keith Harshman, Ioannis Xenarios, Emmanouil Dermitzakis                                                                                                                                                                                               |                                                                                                                                                                         |
| EPI_ISL_940771                                                                                                                                                                                                                                                                                                                                                                                                                                                                                                                                                                                                                                                                                                                                                                                                                                                                                                                                                                                                                                                                                                                                                                                                                                                                                                                                                                                                                                                                                                                                                                                                                                                                                                                                                                                                                                                                                                                                                                                                                                                                                                                                                                                                                                                                                                                                                                                                                                                                                                                                                                                                                                                                                                                                                                                                                                                                                                                                                                                                                                                                                                                                                                                                                                                                                                                                                                                                                                                                                                                                                                                                                                                                                                                                                                                                                                                                                                                                                                                                                                                                                                                                                                                                                                                                                                                                                                                                                                                                                                                                                                                                                                                                                                                                                                                                                                                                                                                                                                                                                                                                                                                                                                                                                                                                                                                                                                                                                                                                                                                                                                                                                                                                                                                                                                                                                                                                                                                                                                                                                                                                                                                                                                                                                                                                                                                                                                                                                                                                                                                                                                                                                                                                                                                                                                                                                                                                                                                                                                                                                                                                                                                                                                                                                                                                                                                                                                                                                                                                 | Center for Laboratory Medicine St. Gallen              | Center for Laboratory Medicine St. Gallen                                                                                              | Yannick Gerth                                                                                                                                                                                                                                                                                                                                                         |                                                                                                                                                                         |
| EPI_ISL_942376, EPI_ISL_942406                                                                                                                                                                                                                                                                                                                                                                                                                                                                                                                                                                                                                                                                                                                                                                                                                                                                                                                                                                                                                                                                                                                                                                                                                                                                                                                                                                                                                                                                                                                                                                                                                                                                                                                                                                                                                                                                                                                                                                                                                                                                                                                                                                                                                                                                                                                                                                                                                                                                                                                                                                                                                                                                                                                                                                                                                                                                                                                                                                                                                                                                                                                                                                                                                                                                                                                                                                                                                                                                                                                                                                                                                                                                                                                                                                                                                                                                                                                                                                                                                                                                                                                                                                                                                                                                                                                                                                                                                                                                                                                                                                                                                                                                                                                                                                                                                                                                                                                                                                                                                                                                                                                                                                                                                                                                                                                                                                                                                                                                                                                                                                                                                                                                                                                                                                                                                                                                                                                                                                                                                                                                                                                                                                                                                                                                                                                                                                                                                                                                                                                                                                                                                                                                                                                                                                                                                                                                                                                                                                                                                                                                                                                                                                                                                                                                                                                                                                                                                                                 | Viollier AG                                            | University Hospital Basel, Clinical Bacteriology                                                                                       | Tim Roloff, Madlen Stange, Helena MB Seth-Smith, Alfredo Mari, Karoline Leuzinger, Julia Bielicki, Christiane Beckmann, Manuel Bategay, Hans Hirsch, Adrian Egli                                                                                                                                                                                                      |                                                                                                                                                                         |
| EPI_ISL_942515                                                                                                                                                                                                                                                                                                                                                                                                                                                                                                                                                                                                                                                                                                                                                                                                                                                                                                                                                                                                                                                                                                                                                                                                                                                                                                                                                                                                                                                                                                                                                                                                                                                                                                                                                                                                                                                                                                                                                                                                                                                                                                                                                                                                                                                                                                                                                                                                                                                                                                                                                                                                                                                                                                                                                                                                                                                                                                                                                                                                                                                                                                                                                                                                                                                                                                                                                                                                                                                                                                                                                                                                                                                                                                                                                                                                                                                                                                                                                                                                                                                                                                                                                                                                                                                                                                                                                                                                                                                                                                                                                                                                                                                                                                                                                                                                                                                                                                                                                                                                                                                                                                                                                                                                                                                                                                                                                                                                                                                                                                                                                                                                                                                                                                                                                                                                                                                                                                                                                                                                                                                                                                                                                                                                                                                                                                                                                                                                                                                                                                                                                                                                                                                                                                                                                                                                                                                                                                                                                                                                                                                                                                                                                                                                                                                                                                                                                                                                                                                                 | University Hospital Basel, Clinical Virology           | University Hospital Basel, Clinical Bacteriology                                                                                       | Tim Roloff, Madlen Stange, Helena MB Seth-Smith, Alfredo Mari, Karoline Leuzinger, Julia Bielicki, Manuel Bategay, Hans Hirsch, Adrian Egli                                                                                                                                                                                                                           |                                                                                                                                                                         |
| EPI_ISL_953489, EPI_ISL_953490, EPI_ISL_953491, EPI_ISL_953492, EPI_ISL_953493, EPI_ISL_953494, EPI_ISL_953495, EPI_ISL_953496, EPI_ISL_953497, EPI_ISL_953498, EPI_ISL_953499, EPI_ISL_953500, EPI_ISL_953501, EPI_ISL_953502, EPI_ISL_953503, EPI_ISL_953504, EPI_ISL_953505, EPI_ISL_953506, EPI_ISL_953507, EPI_ISL_953508, EPI_ISL_953509, EPI_ISL_953510, EPI_ISL_953511, EPI_ISL_953512, EPI_ISL_953513, EPI_ISL_953514, EPI_ISL_953515, EPI_ISL_953516, EPI_ISL_953517, EPI_ISL_953518, EPI_ISL_953519, EPI_ISL_953520, EPI_ISL_953521, EPI_ISL_953522, EPI_ISL_953523, EPI_ISL_953524, EPI_ISL_953525, EPI_ISL_953526, EPI_ISL_953527, EPI_ISL_953528, EPI_ISL_953529, EPI_ISL_953530, EPI_ISL_953531, EPI_ISL_953532, EPI_ISL_953533, EPI_ISL_953534, EPI_ISL_953535, EPI_ISL_953536, EPI_ISL_953537, EPI_ISL_953538, EPI_ISL_953539, EPI_ISL_953540, EPI_ISL_953541, EPI_ISL_953542, EPI_ISL_953543, EPI_ISL_953544, EPI_ISL_953545, EPI_ISL_953546, EPI_ISL_953547, EPI_ISL_953548, EPI_ISL_953549, EPI_ISL_953550, EPI_ISL_953551, EPI_ISL_953552, EPI_ISL_953553, EPI_ISL_953554, EPI_ISL_953555, EPI_ISL_953556, EPI_ISL_953557, EPI_ISL_953558, EPI_ISL_953559, EPI_ISL_953560, EPI_ISL_953561, EPI_ISL_953562, EPI_ISL_953563, EPI_ISL_953564, EPI_ISL_953565, EPI_ISL_953566, EPI_ISL_953567, EPI_ISL_953568, EPI_ISL_953569, EPI_ISL_953570, EPI_ISL_953571, EPI_ISL_953572, EPI_ISL_953573, EPI_ISL_953574, EPI_ISL_953575, EPI_ISL_953576, EPI_ISL_953577, EPI_ISL_953578, EPI_ISL_953579, EPI_ISL_953580, EPI_ISL_953581, EPI_ISL_953582, EPI_ISL_953583, EPI_ISL_953584, EPI_ISL_953585, EPI_ISL_953586, EPI_ISL_953587, EPI_ISL_953588, EPI_ISL_953589, EPI_ISL_953590, EPI_ISL_953591, EPI_ISL_953592, EPI_ISL_953593, EPI_ISL_953594, EPI_ISL_953595, EPI_ISL_953596, EPI_ISL_953597, EPI_ISL_953598, EPI_ISL_953599, EPI_ISL_953600, EPI_ISL_953601, EPI_ISL_953602, EPI_ISL_953603, EPI_ISL_953604, EPI_ISL_953605, EPI_ISL_953606, EPI_ISL_953607, EPI_ISL_953608, EPI_ISL_953609, EPI_ISL_953610, EPI_ISL_953611, EPI_ISL_953612, EPI_ISL_953613, EPI_ISL_953614, EPI_ISL_953615, EPI_ISL_953616, EPI_ISL_953617, EPI_ISL_953618, EPI_ISL_953619, EPI_ISL_953620, EPI_ISL_953621, EPI_ISL_953622, EPI_ISL_953623, EPI_ISL_953624, EPI_ISL_953625, EPI_ISL_953626, EPI_ISL_953627, EPI_ISL_953628, EPI_ISL_953629, EPI_ISL_953630, EPI_ISL_953631, EPI_ISL_953632, EPI_ISL_953633, EPI_ISL_953634, EPI_ISL_953635, EPI_ISL_953636, EPI_ISL_953637, EPI_ISL_953638, EPI_ISL_953639, EPI_ISL_953640, EPI_ISL_953641, EPI_ISL_953642, EPI_ISL_953643, EPI_ISL_953644, EPI_ISL_953645, EPI_ISL_953646, EPI_ISL_953647, EPI_ISL_953648, EPI_ISL_953649, EPI_ISL_953650, EPI_ISL_953651, EPI_ISL_953652, EPI_ISL_953653, EPI_ISL_953654, EPI_ISL_953655, EPI_ISL_953656, EPI_ISL_953657, EPI_ISL_953658, EPI_ISL_953659, EPI_ISL_953660, EPI_ISL_953661, EPI_ISL_953662, EPI_ISL_953663, EPI_ISL_953664, EPI_ISL_953665, EPI_ISL_953666, EPI_ISL_953667, EPI_ISL_953668, EPI_ISL_953669, EPI_ISL_953670, EPI_ISL_953671, EPI_ISL_953672, EPI_ISL_953673, EPI_ISL_953674, EPI_ISL_953675, EPI_ISL_953676, EPI_ISL_953677, EPI_ISL_953678, EPI_ISL_953679, EPI_ISL_953680, EPI_ISL_953681, EPI_ISL_953682, EPI_ISL_953683, EPI_ISL_953684, EPI_ISL_953685, EPI_ISL_953686, EPI_ISL_953687, EPI_ISL_953688, EPI_ISL_953689, EPI_ISL_953690, EPI_ISL_953691, EPI_ISL_953692, EPI_ISL_953693, EPI_ISL_953694, EPI_ISL_953695, EPI_ISL_953696, EPI_ISL_953697, EPI_ISL_953698, EPI_ISL_953699, EPI_ISL_953700, EPI_ISL_953701, EPI_ISL_953702, EPI_ISL_953703, EPI_ISL_953704, EPI_ISL_953705, EPI_ISL_953706, EPI_ISL_953707, EPI_ISL_953708, EPI_ISL_953709, EPI_ISL_953710, EPI_ISL_953711, EPI_ISL_953712, EPI_ISL_953713, EPI_ISL_953714, EPI_ISL_953715, EPI_ISL_953716, EPI_ISL_953717, EPI_ISL_953718, EPI_ISL_953719, EPI_ISL_953720, EPI_ISL_953721, EPI_ISL_953722, EPI_ISL_953723, EPI_ISL_953724, EPI_ISL_953725, EPI_ISL_953726, EPI_ISL_953727, EPI_ISL_953728, EPI_ISL_953729, EPI_ISL_953730, EPI_ISL_953731, EPI_ISL_953732, EPI_ISL_953733, EPI_ISL_953734, EPI_ISL_953735, EPI_ISL_953736, EPI_ISL_953737, EPI_ISL_953738, EPI_ISL_953739, EPI_ISL_953740, EPI_ISL_953741, EPI_ISL_953742, EPI_ISL_953743, EPI_ISL_953744, EPI_ISL_953745, EPI_ISL_953746, EPI_ISL_953747, EPI_ISL_953748, EPI_ISL_953749, EPI_ISL_953750, EPI_ISL_953751, EPI_ISL_953752, EPI_ISL_953753, EPI_ISL_953754, EPI_ISL_953755, EPI_ISL_953756, EPI_ISL_953757, EPI_ISL_953758, EPI_ISL_953759, EPI_ISL_953760, EPI_ISL_953761, EPI_ISL_953762, EPI_ISL_953763, EPI_ISL_953764, EPI_ISL_953765, EPI_ISL_953766, EPI_ISL_953767, EPI_ISL_953768, EPI_ISL_953769, EPI_ISL_953770, EPI_ISL_953771, EPI_ISL_953772, EPI_ISL_953773, EPI_ISL_953774, EPI_ISL_953775, EPI_ISL_953776, EPI_ISL_953777, EPI_ISL_953778, EPI_ISL_953779, EPI_ISL_953780, EPI_ISL_953781, EPI_ISL_953782, EPI_ISL_953783, EPI_ISL_953784, EPI_ISL_953785, EPI_ISL_953786, EPI_ISL_953787, EPI_ISL_953788, EPI_ISL_953789, EPI_ISL_953790, EPI_ISL_953791, EPI_ISL_953792, EPI_ISL_953793, EPI_ISL_953794, EPI_ISL_953795, EPI_ISL_953796, EPI_ISL_953797, EPI_ISL_953798, EPI_ISL_953799, EPI_ISL_953800, EPI_ISL_953801, EPI_ISL_953802, EPI_ISL_953803, EPI_ISL_953804, EPI_ISL_953805, EPI_ISL_953806, EPI_ISL_953807, EPI_ISL_953808, EPI_ISL_953809, EPI_ISL_953810, EPI_ISL_953811, EPI_ISL_953812, EPI_ISL_953813, EPI_ISL_953814, EPI_ISL_953815, EPI_ISL_953816, EPI_ISL_953817, EPI_ISL_953818, EPI_ISL_953819, EPI_ISL_953820, EPI_ISL_953821, EPI_ISL_953822, EPI_ISL_953823, EPI_ISL_953824, EPI_ISL_953825, EPI_ISL_953826, EPI_ISL_953827, EPI_ISL_953828, EPI_ISL_953829, EPI_ISL_953830, EPI_ISL_953831, EPI_ISL_953832, EPI_ISL_953833, EPI_ISL_953834, EPI_ISL_953835, EPI_ISL_953836, EPI_ISL_953837, EPI_ISL_953838, EPI_ISL_953839, EPI_ISL_953840, EPI_ISL_953841, EPI_ISL_953842, EPI_ISL_953843, EPI_ISL_953844, EPI_ISL_953845, EPI_ISL_953846, EPI_ISL_953847, EPI_ISL_953848, EPI_ISL_953849, EPI_ISL_953850, EPI_ISL_953851, EPI_ISL_953852, EPI_ISL_953853, EPI_ISL_953854, EPI_ISL_953855, EPI_ISL_953856, EPI_ISL_953857, EPI_ISL_953858, EPI_ISL_953859, EPI_ISL_953860, EPI_ISL_953861, EPI_ISL_953862, EPI_ISL_953863, EPI_ISL_953864, EPI_ISL_953865, EPI_ISL_953866, EPI_ISL_953867, EPI_ISL_953868, EPI_ISL_953869, EPI_ISL_953870, EPI_ISL_953871, EPI_ISL_953872, EPI_ISL_953873, EPI_ISL_953874, EPI_ISL_953875, EPI_ISL_953876, EPI_ISL_953877, EPI_ISL_953878, EPI_ISL_953879, EPI_ISL_953880, EPI_ISL_953881, EPI_ISL_953882, EPI_ISL_953883, EPI_ISL_953884, EPI_ISL_953885, EPI_ISL_953886, EPI_ISL_953887, EPI_ISL_953888, EPI_ISL_953889, EPI_ISL_953890, EPI_ISL_953891, EPI_ISL_953892, EPI_ISL_953893, EPI_ISL_953894, EPI_ISL_953895, EPI_ISL_953896, EPI_ISL_953897, EPI_ISL_953898, EPI_ISL_953899, EPI_ISL_953900, EPI_ISL_953901, EPI_ISL_953902, EPI_ISL_953903, EPI_ISL_953904, EPI_ISL_953905, EPI_ISL_953906, EPI_ISL_953907, EPI_ISL_953908, EPI_ISL_953909, EPI_ISL_953910, EPI_ISL_953911, EPI_ISL_953912, EPI_ISL_953913, EPI_ISL_953914, EPI_ISL_953915, EPI_ISL_953916, EPI_ISL_953917, EPI_ISL_953918, EPI_ISL_953919, EPI_ISL_953920, EPI_ISL_953921, EPI_ISL_953922, EPI_ISL_953923, EPI_ISL_953924, EPI_ISL_953925, EPI_ISL_953926, EPI_ISL_953927, EPI_ISL_953928, EPI_ISL_953929, EPI_ISL_953930, EPI_ISL_953931, EPI_ISL_953932, EPI_ISL_953933, EPI_ISL_953934, EPI_ISL_953935, EPI_ISL_953936, EPI_ISL_953937 | see above                                              | University Hospitals of Geneva, Laboratory of Virology                                                                                 | HUG, Laboratory of Virology and the Health2030 Genome Center                                                                                                                                                                                                                                                                                                          | Samuel Cordey, Ana Rita Goncalves, Laurent Kaiser, Lorenzo Cerutti, Henri Pegeot, Melyssa Elies, Deborah Penet, Keith Harshman, Ioannis Xenarios, Emmanouil Dermitzakis |
| EPI_ISL_959369                                                                                                                                                                                                                                                                                                                                                                                                                                                                                                                                                                                                                                                                                                                                                                                                                                                                                                                                                                                                                                                                                                                                                                                                                                                                                                                                                                                                                                                                                                                                                                                                                                                                                                                                                                                                                                                                                                                                                                                                                                                                                                                                                                                                                                                                                                                                                                                                                                                                                                                                                                                                                                                                                                                                                                                                                                                                                                                                                                                                                                                                                                                                                                                                                                                                                                                                                                                                                                                                                                                                                                                                                                                                                                                                                                                                                                                                                                                                                                                                                                                                                                                                                                                                                                                                                                                                                                                                                                                                                                                                                                                                                                                                                                                                                                                                                                                                                                                                                                                                                                                                                                                                                                                                                                                                                                                                                                                                                                                                                                                                                                                                                                                                                                                                                                                                                                                                                                                                                                                                                                                                                                                                                                                                                                                                                                                                                                                                                                                                                                                                                                                                                                                                                                                                                                                                                                                                                                                                                                                                                                                                                                                                                                                                                                                                                                                                                                                                                                                                 | Viollier AG                                            | University Hospital Basel, Clinical Bacteriology                                                                                       | Tim Roloff, Madlen Stange, Helena MB Seth-Smith, Alfredo Mari, Karoline Leuzinger, Julia Bielicki, Christiane Beckmann, Manuel Bategay, Hans Hirsch, Adrian Egli                                                                                                                                                                                                      |                                                                                                                                                                         |
| EPI_ISL_970469                                                                                                                                                                                                                                                                                                                                                                                                                                                                                                                                                                                                                                                                                                                                                                                                                                                                                                                                                                                                                                                                                                                                                                                                                                                                                                                                                                                                                                                                                                                                                                                                                                                                                                                                                                                                                                                                                                                                                                                                                                                                                                                                                                                                                                                                                                                                                                                                                                                                                                                                                                                                                                                                                                                                                                                                                                                                                                                                                                                                                                                                                                                                                                                                                                                                                                                                                                                                                                                                                                                                                                                                                                                                                                                                                                                                                                                                                                                                                                                                                                                                                                                                                                                                                                                                                                                                                                                                                                                                                                                                                                                                                                                                                                                                                                                                                                                                                                                                                                                                                                                                                                                                                                                                                                                                                                                                                                                                                                                                                                                                                                                                                                                                                                                                                                                                                                                                                                                                                                                                                                                                                                                                                                                                                                                                                                                                                                                                                                                                                                                                                                                                                                                                                                                                                                                                                                                                                                                                                                                                                                                                                                                                                                                                                                                                                                                                                                                                                                                                 | EHNV                                                   | Laboratory of genomics and metagenomics, Institute of Microbiology, University Hospital Centre and University of Lausanne, Switzerland | Trestan Pillonel, Damien Jacot, Sébastien Aebly, Gilbert Greub, Claire Bertelli                                                                                                                                                                                                                                                                                       |                                                                                                                                                                         |
| EPI_ISL_981549, EPI_ISL_981552, EPI_ISL_981556, EPI_ISL_981558, EPI_ISL_981560, EPI_ISL_981561, EPI_ISL_981562, EPI_ISL_981563, EPI_ISL_981564, EPI_ISL_981565, EPI_ISL_981566, EPI_ISL_981567, EPI_ISL_981568, EPI_ISL_981569, EPI_ISL_981570, EPI_ISL_981571, EPI_ISL_981572, EPI_ISL_981573, EPI_ISL_981574, EPI_ISL_981575, EPI_ISL_981576, EPI_ISL_981577, EPI_ISL_981578, EPI_ISL_981579, EPI_ISL_981580, EPI_ISL_981581, EPI_ISL_981582, EPI_ISL_981583, EPI_ISL_981584, EPI_ISL_981585, EPI_ISL_981586, EPI_ISL_981587, EPI_ISL_981588, EPI_ISL_981589, EPI_ISL_981590, EPI_ISL_981591, EPI_ISL_981592, EPI_ISL_981593, EPI_ISL_981594, EPI_ISL_981595, EPI_ISL_981596, EPI_ISL_981597, EPI_ISL_981642, EPI_ISL_981650, EPI_ISL_981651, EPI_ISL_981652, EPI_ISL_981653, EPI_ISL_981654, EPI_ISL_981655, EPI_ISL_981656, EPI_ISL_981657, EPI_ISL_981658, EPI_ISL_981659, EPI_ISL_981660, EPI_ISL_981661, EPI_ISL_981663, EPI_ISL_981664, EPI_ISL_981665, EPI_ISL_981666, EPI_ISL_981667, EPI_ISL_981668, EPI_ISL_981669, EPI_ISL_981670, EPI_ISL_981671, EPI_ISL_981672, EPI_ISL_981673, EPI_ISL_981674, EPI_ISL_981675, EPI_ISL_981676, EPI_ISL_981677, EPI_ISL_981678, EPI_ISL_981679, EPI_ISL_981680, EPI_ISL_981681, EPI_ISL_981682, EPI_ISL_981683, EPI_ISL_981684, EPI_ISL_981700, EPI_ISL_981701, EPI_ISL_981702, EPI_ISL_981704, EPI_ISL_981706, EPI_ISL_981707, EPI_ISL_981708, EPI_ISL_981709, EPI_ISL_981713, EPI_ISL_981714, EPI_ISL_981715, EPI_ISL_981716, EPI_ISL_981717, EPI_ISL_981719, EPI_ISL_981720, EPI_ISL_981722, EPI_ISL_981723, EPI_ISL_981724, EPI_ISL_981725, EPI_ISL_981726, EPI_ISL_981727, EPI_ISL_981728, EPI_ISL_981729, EPI_ISL_981730, EPI_ISL_981731, EPI_ISL_981732, EPI_ISL_981733, EPI_ISL_981734, EPI_ISL_981735, EPI_ISL_981736, EPI_ISL_981737, EPI_ISL_981738, EPI_ISL_981739, EPI_ISL_981740, EPI_ISL_981741, EPI_ISL_981742, EPI_ISL_981743, EPI_ISL_981744, EPI_ISL_981745, EPI_ISL_981746, EPI_ISL_981747, EPI_ISL_981748, EPI_ISL_981749, EPI_ISL_981750, EPI_ISL_981751, EPI_ISL_981752, EPI_ISL_981753, EPI_ISL_981754, EPI_ISL_981755, EPI_ISL_981756                                                                                                                                                                                                                                                                                                                                                                                                                                                                                                                                                                                                                                                                                                                                                                                                                                                                                                                                                                                                                                                                                                                                                                                                                                                                                                                                                                                                                                                                                                                                                                                                                                                                                                                                                                                                                                                                                                                                                                                                                                                                                                                                                                                                                                                                                                                                                                                                                                                                                                                                                                                                                                                                                                                                                                                                                                                                                                                                                                                                                                                                                                                                                                                                                                                                                                                                                                                                                                                                                                                                                                                                                                                                                                                                                                                                                                                                                                                                                                                                                                                                                                                                                                                                                                                                                                                                                                                                                                                                                                                                                                                                                                                                                                                                                                                                                                                                                                                                                                                                                                                                                                                                                                                                                                                                                                                                                                 |                                                        |                                                                                                                                        |                                                                                                                                                                                                                                                                                                                                                                       |                                                                                                                                                                         |

EPI\_ISL\_981757, EPI\_ISL\_981758, EPI\_ISL\_981759, EPI\_ISL\_981760, EPI\_ISL\_981761, EPI\_ISL\_981762, EPI\_ISL\_981763, EPI\_ISL\_981764, EPI\_ISL\_981765, EPI\_ISL\_981766, EPI\_ISL\_981767, EPI\_ISL\_981768, EPI\_ISL\_981769, EPI\_ISL\_981770, EPI\_ISL\_981771, EPI\_ISL\_981772, EPI\_ISL\_981773, EPI\_ISL\_981774, EPI\_ISL\_981775, EPI\_ISL\_981776, EPI\_ISL\_981777, EPI\_ISL\_981778, EPI\_ISL\_981779, EPI\_ISL\_981780, EPI\_ISL\_981781, EPI\_ISL\_981782, EPI\_ISL\_981783, EPI\_ISL\_981784, EPI\_ISL\_981785, EPI\_ISL\_981786, EPI\_ISL\_981787, EPI\_ISL\_981788, EPI\_ISL\_981789, EPI\_ISL\_981800, EPI\_ISL\_981813, EPI\_ISL\_981827, EPI\_ISL\_981828, EPI\_ISL\_981829, EPI\_ISL\_981830, EPI\_ISL\_981831, EPI\_ISL\_981832, EPI\_ISL\_981837, EPI\_ISL\_981838, EPI\_ISL\_981839, EPI\_ISL\_981840, EPI\_ISL\_981841, EPI\_ISL\_981842, EPI\_ISL\_981843, EPI\_ISL\_981844, EPI\_ISL\_981845, EPI\_ISL\_981846, EPI\_ISL\_981847, EPI\_ISL\_981848

see above

University Hospitals of Geneva, Laboratory of Virology

HUG, Laboratory of Virology and the Health2030 Genome Center

Samuel Cordey, Ana Rita Goncalves, Laurent Kaiser, Lorenzo Cerutti, Henri Pegeot, Melyssa Elies, Deborah Penet, Keith Harshman, Ioannis Xenarios, Emmanouil Dermitzakis

































































|                                                                                                                                                                                                                                                                                                                                   |                                              |                                                              |                                                                                                                                                                                                                                                                                                                                                                                                                                                                         |
|-----------------------------------------------------------------------------------------------------------------------------------------------------------------------------------------------------------------------------------------------------------------------------------------------------------------------------------|----------------------------------------------|--------------------------------------------------------------|-------------------------------------------------------------------------------------------------------------------------------------------------------------------------------------------------------------------------------------------------------------------------------------------------------------------------------------------------------------------------------------------------------------------------------------------------------------------------|
| EPI_ISL_1388652                                                                                                                                                                                                                                                                                                                   | University Hospital Basel, Clinical Virology | University Hospital Basel, Clinical Bacteriology             | Tim Roloff, Madlen Stange, Helena MB Seth-Smith, Alfredo Mari, Karoline Leuzinger, Julia Bielicki, Manuel Battegay, Hans Hirsch, Adrian Egli                                                                                                                                                                                                                                                                                                                            |
| EPI_ISL_1388669, EPI_ISL_1388679, EPI_ISL_1388683                                                                                                                                                                                                                                                                                 | University Hospital Basel, Clinical Virology | University Hospital Basel, Clinical Bacteriology             | Tim Roloff, Madlen Stange, Helena MB Seth-Smith, Alfredo Mari, Karoline Leuzinger, Julia Bielicki, Simon Fuchs, Manuel Battegay, Hans Hirsch, Adrian Egli                                                                                                                                                                                                                                                                                                               |
| EPI_ISL_1388697                                                                                                                                                                                                                                                                                                                   | University Hospital Basel, Clinical Virology | University Hospital Basel, Clinical Bacteriology             | Tim Roloff, Madlen Stange, Helena MB Seth-Smith, Alfredo Mari, Karoline Leuzinger, Julia Bielicki, Manuel Battegay, Hans Hirsch, Adrian Egli                                                                                                                                                                                                                                                                                                                            |
| EPI_ISL_1388716                                                                                                                                                                                                                                                                                                                   | Rothen Medizinische Laboratorien AG          | University Hospital Basel, Clinical Bacteriology             | Tim Roloff, Madlen Stange, Helena MB Seth-Smith, Alfredo Mari, Karoline Leuzinger, Julia Bielicki, Ingrid Steffen, Manuel Battegay, Hans Hirsch, Adrian Egli                                                                                                                                                                                                                                                                                                            |
| EPI_ISL_1388720                                                                                                                                                                                                                                                                                                                   | University Hospital Basel, Clinical Virology | University Hospital Basel, Clinical Bacteriology             | Tim Roloff, Madlen Stange, Helena MB Seth-Smith, Alfredo Mari, Karoline Leuzinger, Julia Bielicki, Manuel Battegay, Hans Hirsch, Adrian Egli                                                                                                                                                                                                                                                                                                                            |
| EPI_ISL_1388722                                                                                                                                                                                                                                                                                                                   | University Hospital Basel, Clinical Virology | University Hospital Basel, Clinical Bacteriology             | Tim Roloff, Madlen Stange, Helena MB Seth-Smith, Alfredo Mari, Karoline Leuzinger, Julia Bielicki, Simon Fuchs, Manuel Battegay, Hans Hirsch, Adrian Egli                                                                                                                                                                                                                                                                                                               |
| EPI_ISL_1388723, EPI_ISL_1388729, EPI_ISL_1388731, EPI_ISL_1388733                                                                                                                                                                                                                                                                | University Hospital Basel, Clinical Virology | University Hospital Basel, Clinical Bacteriology             | Tim Roloff, Madlen Stange, Helena MB Seth-Smith, Alfredo Mari, Karoline Leuzinger, Julia Bielicki, Manuel Battegay, Hans Hirsch, Adrian Egli                                                                                                                                                                                                                                                                                                                            |
| EPI_ISL_1388735                                                                                                                                                                                                                                                                                                                   | Viollier AG                                  | University Hospital Basel, Clinical Bacteriology             | Tim Roloff, Madlen Stange, Helena MB Seth-Smith, Alfredo Mari, Karoline Leuzinger, Julia Bielicki, Lukas Fenner, Manuel Battegay, Hans Hirsch, Adrian Egli                                                                                                                                                                                                                                                                                                              |
| EPI_ISL_1388737                                                                                                                                                                                                                                                                                                                   | University Hospital Basel, Clinical Virology | University Hospital Basel, Clinical Bacteriology             | Tim Roloff, Madlen Stange, Helena MB Seth-Smith, Alfredo Mari, Karoline Leuzinger, Julia Bielicki, Simon Fuchs, Manuel Battegay, Hans Hirsch, Adrian Egli                                                                                                                                                                                                                                                                                                               |
| EPI_ISL_1388740                                                                                                                                                                                                                                                                                                                   | Rothen Medizinische Laboratorien AG          | University Hospital Basel, Clinical Bacteriology             | Tim Roloff, Madlen Stange, Helena MB Seth-Smith, Alfredo Mari, Karoline Leuzinger, Julia Bielicki, Ingrid Steffen, Manuel Battegay, Hans Hirsch, Adrian Egli                                                                                                                                                                                                                                                                                                            |
| EPI_ISL_1388742, EPI_ISL_1388988, EPI_ISL_1388989, EPI_ISL_1389011, EPI_ISL_1389012, EPI_ISL_1389013, EPI_ISL_1389014, EPI_ISL_1389015, EPI_ISL_1389016, EPI_ISL_1389017                                                                                                                                                          | University Hospital Basel, Clinical Virology | University Hospital Basel, Clinical Bacteriology             | Tim Roloff, Madlen Stange, Helena MB Seth-Smith, Alfredo Mari, Karoline Leuzinger, Julia Bielicki, Manuel Battegay, Hans Hirsch, Adrian Egli                                                                                                                                                                                                                                                                                                                            |
| EPI_ISL_1389019, EPI_ISL_1389020, EPI_ISL_1389021, EPI_ISL_1389022, EPI_ISL_1389023                                                                                                                                                                                                                                               | Rothen Medizinische Laboratorien AG          | University Hospital Basel, Clinical Bacteriology             | Tim Roloff, Madlen Stange, Helena MB Seth-Smith, Alfredo Mari, Karoline Leuzinger, Julia Bielicki, Ingrid Steffen, Manuel Battegay, Hans Hirsch, Adrian Egli                                                                                                                                                                                                                                                                                                            |
| EPI_ISL_1389026, EPI_ISL_1389027, EPI_ISL_1389029                                                                                                                                                                                                                                                                                 | University Hospital Basel, Clinical Virology | University Hospital Basel, Clinical Bacteriology             | Tim Roloff, Madlen Stange, Helena MB Seth-Smith, Alfredo Mari, Karoline Leuzinger, Julia Bielicki, Manuel Battegay, Hans Hirsch, Adrian Egli                                                                                                                                                                                                                                                                                                                            |
| EPI_ISL_1389031, EPI_ISL_1389032, EPI_ISL_1389033, EPI_ISL_1389034, EPI_ISL_1389035, EPI_ISL_1389036                                                                                                                                                                                                                              | Rothen Medizinische Laboratorien AG          | University Hospital Basel, Clinical Bacteriology             | Tim Roloff, Madlen Stange, Helena MB Seth-Smith, Alfredo Mari, Karoline Leuzinger, Julia Bielicki, Ingrid Steffen, Manuel Battegay, Hans Hirsch, Adrian Egli                                                                                                                                                                                                                                                                                                            |
| EPI_ISL_1389037, EPI_ISL_1389039, EPI_ISL_1389041, EPI_ISL_1389043, EPI_ISL_1389045, EPI_ISL_1389047                                                                                                                                                                                                                              | University Hospital Basel, Clinical Virology | University Hospital Basel, Clinical Bacteriology             | Tim Roloff, Madlen Stange, Helena MB Seth-Smith, Alfredo Mari, Karoline Leuzinger, Julia Bielicki, Manuel Battegay, Hans Hirsch, Adrian Egli                                                                                                                                                                                                                                                                                                                            |
| EPI_ISL_1389061, EPI_ISL_1389063                                                                                                                                                                                                                                                                                                  | Rothen Medizinische Laboratorien AG          | University Hospital Basel, Clinical Bacteriology             | Tim Roloff, Madlen Stange, Helena MB Seth-Smith, Alfredo Mari, Karoline Leuzinger, Julia Bielicki, Ingrid Steffen, Manuel Battegay, Hans Hirsch, Adrian Egli                                                                                                                                                                                                                                                                                                            |
| EPI_ISL_1389065, EPI_ISL_1389067, EPI_ISL_1389070, EPI_ISL_1389072, EPI_ISL_1389074                                                                                                                                                                                                                                               | University Hospital Basel, Clinical Virology | University Hospital Basel, Clinical Bacteriology             | Tim Roloff, Madlen Stange, Helena MB Seth-Smith, Alfredo Mari, Karoline Leuzinger, Julia Bielicki, Simon Fuchs, Manuel Battegay, Hans Hirsch, Adrian Egli                                                                                                                                                                                                                                                                                                               |
| EPI_ISL_1389078                                                                                                                                                                                                                                                                                                                   | Rothen Medizinische Laboratorien AG          | University Hospital Basel, Clinical Bacteriology             | Tim Roloff, Madlen Stange, Helena MB Seth-Smith, Alfredo Mari, Karoline Leuzinger, Julia Bielicki, Ingrid Steffen, Manuel Battegay, Hans Hirsch, Adrian Egli                                                                                                                                                                                                                                                                                                            |
| EPI_ISL_1389081, EPI_ISL_1389083, EPI_ISL_1389085, EPI_ISL_1389087, EPI_ISL_1389089, EPI_ISL_1389091, EPI_ISL_1389093, EPI_ISL_1389095, EPI_ISL_1389097, EPI_ISL_1389099, EPI_ISL_1389101, EPI_ISL_1389103, EPI_ISL_1389105, EPI_ISL_1389107, EPI_ISL_1389109, EPI_ISL_1389111, EPI_ISL_1389113, EPI_ISL_1389114, EPI_ISL_1389137 | University Hospital Basel, Clinical Virology | University Hospital Basel, Clinical Bacteriology             | Tim Roloff, Madlen Stange, Helena MB Seth-Smith, Alfredo Mari, Karoline Leuzinger, Julia Bielicki, Simon Fuchs, Manuel Battegay, Hans Hirsch, Adrian Egli                                                                                                                                                                                                                                                                                                               |
| see above                                                                                                                                                                                                                                                                                                                         | University Hospital Basel, Clinical Virology | University Hospital Basel, Clinical Bacteriology             | Tim Roloff, Madlen Stange, Helena MB Seth-Smith, Alfredo Mari, Karoline Leuzinger, Julia Bielicki, Simon Fuchs, Manuel Battegay, Hans Hirsch, Adrian Egli                                                                                                                                                                                                                                                                                                               |
| EPI_ISL_1406788                                                                                                                                                                                                                                                                                                                   | Viollier AG                                  | Department of Biosystems Science and Engineering, ETH Zürich | Christian Beisel, Sarah Nadeau, Chaoran Chen, Ivan Topolsky, Philipp Jablonski, Lara Fuhrmann, David Dreifuss, Katharina Jahn, Rebecca Denes, Mirjam Feldkamp, Ina Nissen, Natascha Santacroce, Elodie Burcklen, Christiane Beckmann, Maurice Redondo, Olivier Kobel, Christoph Noppen, Sophie Seidel, Noemie Santamaria de Souza, Niko Beerenwinkel, Tanja Stadler                                                                                                     |
| EPI_ISL_1406813                                                                                                                                                                                                                                                                                                                   | Viollier AG                                  | Department of Biosystems Science and Engineering, ETH Zürich | Chaoran Chen, Sarah Nadeau, Ivan Topolsky, Emmanouil Dermizakis, Keith Harshman, Ioannis Xenarios, Henri Pegeot, Lorenzo Cerutti, Deborah Penet, Philipp Jablonski, Lara Fuhrmann, David Dreifuss, Katharina Jahn, Christiane Beckmann, Maurice Redondo, Olivier Kobel, Christoph Noppen, Sophie Seidel, Noemie Santamaria de Souza, Niko Beerenwinkel, Tanja Stadler                                                                                                   |
| EPI_ISL_1406823, EPI_ISL_1406830, EPI_ISL_1406832, EPI_ISL_1406833, EPI_ISL_1406835                                                                                                                                                                                                                                               | Viollier AG                                  | Department of Biosystems Science and Engineering, ETH Zürich | Christian Beisel, Sarah Nadeau, Chaoran Chen, Ivan Topolsky, Philipp Jablonski, Lara Fuhrmann, David Dreifuss, Katharina Jahn, Rebecca Denes, Mirjam Feldkamp, Ina Nissen, Natascha Santacroce, Elodie Burcklen, Christiane Beckmann, Maurice Redondo, Olivier Kobel, Christoph Noppen, Sophie Seidel, Noemie Santamaria de Souza, Niko Beerenwinkel, Tanja Stadler                                                                                                     |
| EPI_ISL_1406842                                                                                                                                                                                                                                                                                                                   | Viollier AG                                  | Department of Biosystems Science and Engineering, ETH Zürich | Chaoran Chen, Sarah Nadeau, Catharine Aquino, Ivan Topolsky, Philipp Jablonski, Lara Fuhrmann, David Dreifuss, Katharina Jahn, Andrea Cabral de Gouvea, Maria Domenica Moccia, Simon Grüter, Timothy Sykes, Lennart Opitz, Griffin White, Laura Neff, Doris Popovic, Andrea Patrignani, Jay Tracy, Ralph Schlapbach, Christiane Beckmann, Maurice Redondo, Olivier Kobel, Christoph Noppen, Sophie Seidel, Noemie Santamaria de Souza, Niko Beerenwinkel, Tanja Stadler |
| EPI_ISL_1406855, EPI_ISL_1406863, EPI_ISL_1406871, EPI_ISL_1406874, EPI_ISL_1406878, EPI_ISL_1406885, EPI_ISL_1406896, EPI_ISL_1406901, EPI_ISL_1406903                                                                                                                                                                           | Viollier AG                                  | Department of Biosystems Science and Engineering, ETH Zürich | Christian Beisel, Sarah Nadeau, Chaoran Chen, Ivan Topolsky, Philipp Jablonski, Lara Fuhrmann, David Dreifuss, Katharina Jahn, Rebecca Denes, Mirjam Feldkamp, Ina Nissen, Natascha Santacroce, Elodie Burcklen, Christiane Beckmann, Maurice Redondo, Olivier Kobel, Christoph Noppen, Sophie Seidel, Noemie Santamaria de Souza, Niko Beerenwinkel, Tanja Stadler                                                                                                     |
| EPI_ISL_1406909                                                                                                                                                                                                                                                                                                                   | Viollier AG                                  | Department of Biosystems Science and Engineering, ETH Zürich | Chaoran Chen, Sarah Nadeau, Catharine Aquino, Ivan Topolsky, Philipp Jablonski, Lara Fuhrmann, David Dreifuss, Katharina Jahn, Andrea Cabral de Gouvea, Maria Domenica Moccia, Simon Grüter, Timothy Sykes, Lennart Opitz, Griffin White, Laura Neff, Doris Popovic, Andrea Patrignani, Jay Tracy, Ralph Schlapbach, Christiane Beckmann, Maurice Redondo, Olivier Kobel, Christoph Noppen, Sophie Seidel, Noemie Santamaria de Souza, Niko Beerenwinkel, Tanja Stadler |
| EPI_ISL_1406913, EPI_ISL_1406916, EPI_ISL_1406921, EPI_ISL_1406939, EPI_ISL_1406960, EPI_ISL_1406985, EPI_ISL_1406994                                                                                                                                                                                                             | Viollier AG                                  | Department of Biosystems Science and Engineering, ETH Zürich | Christian Beisel, Sarah Nadeau, Chaoran Chen, Ivan Topolsky, Philipp Jablonski, Lara Fuhrmann, David Dreifuss, Katharina Jahn, Rebecca Denes, Mirjam Feldkamp, Ina Nissen, Natascha Santacroce, Elodie Burcklen, Christiane Beckmann, Maurice Redondo, Olivier Kobel, Christoph Noppen, Sophie Seidel, Noemie Santamaria de Souza, Niko Beerenwinkel, Tanja Stadler                                                                                                     |
| EPI_ISL_1407007                                                                                                                                                                                                                                                                                                                   | Viollier AG                                  | Department of Biosystems Science and Engineering, ETH Zürich | Chaoran Chen, Sarah Nadeau, Catharine Aquino, Ivan Topolsky, Philipp Jablonski, Lara Fuhrmann, David Dreifuss, Katharina Jahn, Andrea Cabral de Gouvea, Maria Domenica Moccia, Simon Grüter, Timothy Sykes, Lennart Opitz, Griffin White, Laura Neff, Doris Popovic, Andrea Patrignani, Jay Tracy, Ralph Schlapbach, Christiane Beckmann, Maurice Redondo, Olivier Kobel, Christoph Noppen, Sophie Seidel, Noemie Santamaria de Souza, Niko Beerenwinkel, Tanja Stadler |

|                                                                                                                                                                                                                                                                                                                                                                                                                                                                                                                                                                                                                                                                                       |                                           |                                                              |                                                                                                                                                                                                                                                                                                                                                                                                                                                                        |
|---------------------------------------------------------------------------------------------------------------------------------------------------------------------------------------------------------------------------------------------------------------------------------------------------------------------------------------------------------------------------------------------------------------------------------------------------------------------------------------------------------------------------------------------------------------------------------------------------------------------------------------------------------------------------------------|-------------------------------------------|--------------------------------------------------------------|------------------------------------------------------------------------------------------------------------------------------------------------------------------------------------------------------------------------------------------------------------------------------------------------------------------------------------------------------------------------------------------------------------------------------------------------------------------------|
| EPI_ISL_1407023                                                                                                                                                                                                                                                                                                                                                                                                                                                                                                                                                                                                                                                                       | Viollier AG                               | Department of Biosystems Science and Engineering, ETH Zürich | Chaoran Chen, Sarah Nadeau, Ivan Topolsky, Emmanouil Dermizakis, Keith Harshman, Ioannis Xenarios, Henri Pegeot, Lorenzo Cerutti, Deborah Penet, Philipp Jablonski, Lara Fuhrmann, David Dreifuss, Katharina Jahn, Christiane Beckmann, Maurice Redondo, Olivier Kobel, Christoph Noppen, Sophie Seidel, Noemie Santamaria de Souza, Niko Beerenwinkel, Tanja Stadler                                                                                                  |
| EPI_ISL_1407032                                                                                                                                                                                                                                                                                                                                                                                                                                                                                                                                                                                                                                                                       | Viollier AG                               | Department of Biosystems Science and Engineering, ETH Zürich | Chaoran Chen, Sarah Nadeau, Catharine Aquino, Ivan Topolsky, Philipp Jablonski, Lara Fuhrmann, David Dreifuss, Katharina Jahn, Andrea Cabral de Gouvea, Maria Domenica Moccia, Simon Grüter, Timothy Sykes, Lennart Opitz, Griffin White, Laura Neff, Doris Popovic, Andrea Patignani, Jay Tracy, Ralph Schlapbach, Christiane Beckmann, Maurice Redondo, Olivier Kobel, Christoph Noppen, Sophie Seidel, Noemie Santamaria de Souza, Niko Beerenwinkel, Tanja Stadler |
| EPI_ISL_1407033                                                                                                                                                                                                                                                                                                                                                                                                                                                                                                                                                                                                                                                                       | Viollier AG                               | Department of Biosystems Science and Engineering, ETH Zürich | Christian Beisel, Sarah Nadeau, Chaoran Chen, Ivan Topolsky, Philipp Jablonski, Lara Fuhrmann, David Dreifuss, Katharina Jahn, Rebecca Denes, Mirjam Feldkamp, Ina Nissen, Natascha Santacroce, Elodie Burcklen, Christiane Beckmann, Maurice Redondo, Olivier Kobel, Christoph Noppen, Sophie Seidel, Noemie Santamaria de Souza, Niko Beerenwinkel, Tanja Stadler                                                                                                    |
| EPI_ISL_1407048, EPI_ISL_1407050                                                                                                                                                                                                                                                                                                                                                                                                                                                                                                                                                                                                                                                      | Viollier AG                               | Department of Biosystems Science and Engineering, ETH Zürich | Chaoran Chen, Sarah Nadeau, Ivan Topolsky, Emmanouil Dermizakis, Keith Harshman, Ioannis Xenarios, Henri Pegeot, Lorenzo Cerutti, Deborah Penet, Philipp Jablonski, Lara Fuhrmann, David Dreifuss, Katharina Jahn, Christiane Beckmann, Maurice Redondo, Olivier Kobel, Christoph Noppen, Sophie Seidel, Noemie Santamaria de Souza, Niko Beerenwinkel, Tanja Stadler                                                                                                  |
| EPI_ISL_1407065, EPI_ISL_1407077, EPI_ISL_1407079                                                                                                                                                                                                                                                                                                                                                                                                                                                                                                                                                                                                                                     | Viollier AG                               | Department of Biosystems Science and Engineering, ETH Zürich | Christian Beisel, Sarah Nadeau, Chaoran Chen, Ivan Topolsky, Philipp Jablonski, Lara Fuhrmann, David Dreifuss, Katharina Jahn, Rebecca Denes, Mirjam Feldkamp, Ina Nissen, Natascha Santacroce, Elodie Burcklen, Christiane Beckmann, Maurice Redondo, Olivier Kobel, Christoph Noppen, Sophie Seidel, Noemie Santamaria de Souza, Niko Beerenwinkel, Tanja Stadler                                                                                                    |
| EPI_ISL_1517297, EPI_ISL_1517351                                                                                                                                                                                                                                                                                                                                                                                                                                                                                                                                                                                                                                                      | CHUV                                      | Laboratory of genomics and metagenomics                      | Trestan Pilonel, Damien Jacot, SÅ@bastien Aeby, Gilbert Greub, Claire Bertelli                                                                                                                                                                                                                                                                                                                                                                                         |
| EPI_ISL_1594292, EPI_ISL_1594293, EPI_ISL_1594294, EPI_ISL_1594295, EPI_ISL_1594296, EPI_ISL_1594297, EPI_ISL_1594298, EPI_ISL_1594299, EPI_ISL_1594300, EPI_ISL_1594301, EPI_ISL_1594302                                                                                                                                                                                                                                                                                                                                                                                                                                                                                             | Center for Laboratory Medicine St. Gallen | Center for Laboratory Medicine St. Gallen                    | Yannick Gerth                                                                                                                                                                                                                                                                                                                                                                                                                                                          |
| see above                                                                                                                                                                                                                                                                                                                                                                                                                                                                                                                                                                                                                                                                             | Center for Laboratory Medicine St. Gallen | Center for Laboratory Medicine St. Gallen                    | Yannick Gerth                                                                                                                                                                                                                                                                                                                                                                                                                                                          |
| EPI_ISL_1594303                                                                                                                                                                                                                                                                                                                                                                                                                                                                                                                                                                                                                                                                       | Center for Laboratory Medicine            | Center for Laboratory Medicine                               | Yannick Gerth                                                                                                                                                                                                                                                                                                                                                                                                                                                          |
| EPI_ISL_1594304, EPI_ISL_1594305, EPI_ISL_1594346                                                                                                                                                                                                                                                                                                                                                                                                                                                                                                                                                                                                                                     | Center for Laboratory Medicine St. Gallen | Center for Laboratory Medicine St. Gallen                    | Yannick Gerth                                                                                                                                                                                                                                                                                                                                                                                                                                                          |
| EPI_ISL_1663588, EPI_ISL_1663590, EPI_ISL_1670549, EPI_ISL_1670554, EPI_ISL_1670555, EPI_ISL_1670556, EPI_ISL_1670558, EPI_ISL_1670559, EPI_ISL_1670561, EPI_ISL_1670562, EPI_ISL_1670563, EPI_ISL_1670565, EPI_ISL_1670574, EPI_ISL_1706591, EPI_ISL_1706592                                                                                                                                                                                                                                                                                                                                                                                                                         | Biolytix AG                               | Swiss Tropical and Public Health Institute                   | Salome Hosch, Philipp Wagner, Curdin Decurtins, Anna Henger, Ralf Seyfarth, Adrian Härrli, Claudia Daubenberger, Tobias Schindler                                                                                                                                                                                                                                                                                                                                      |
| see above                                                                                                                                                                                                                                                                                                                                                                                                                                                                                                                                                                                                                                                                             | Biolytix AG                               | Swiss Tropical and Public Health Institute                   | Salome Hosch, Philipp Wagner, Curdin Decurtins, Anna Henger, Ralf Seyfarth, Adrian Härrli, Claudia Daubenberger, Tobias Schindler                                                                                                                                                                                                                                                                                                                                      |
| EPI_ISL_1747461, EPI_ISL_1747462, EPI_ISL_1747463, EPI_ISL_1747464, EPI_ISL_1747465, EPI_ISL_1747466, EPI_ISL_1747467, EPI_ISL_1747468, EPI_ISL_1747469, EPI_ISL_1747470, EPI_ISL_1747471, EPI_ISL_1747472, EPI_ISL_1747473, EPI_ISL_1747474, EPI_ISL_1747475, EPI_ISL_1747476, EPI_ISL_1747477, EPI_ISL_1747478, EPI_ISL_1747479, EPI_ISL_1747480, EPI_ISL_1747481, EPI_ISL_1747482, EPI_ISL_1747483, EPI_ISL_1747484, EPI_ISL_1747485, EPI_ISL_1747486, EPI_ISL_1747487, EPI_ISL_1747488, EPI_ISL_1747489, EPI_ISL_1747490, EPI_ISL_1747491, EPI_ISL_1747492, EPI_ISL_1747493, EPI_ISL_1747494, EPI_ISL_1747495, EPI_ISL_1747496, EPI_ISL_1747497, EPI_ISL_1747498, EPI_ISL_1747499 | Viollier AG                               | Clinical Bacteriology                                        | Tim Roloff, Madlen Stange, Helena MB Seth-Smith, Alfredo Mari, Karoline Leuzinger, Julia Bielicki, Christiane Beckmann, Manuel Battegay, Hans Hirsch, Adrian Egli                                                                                                                                                                                                                                                                                                      |
| see above                                                                                                                                                                                                                                                                                                                                                                                                                                                                                                                                                                                                                                                                             | Viollier AG                               | Clinical Bacteriology                                        | Tim Roloff, Madlen Stange, Helena MB Seth-Smith, Alfredo Mari, Karoline Leuzinger, Julia Bielicki, Christiane Beckmann, Manuel Battegay, Hans Hirsch, Adrian Egli                                                                                                                                                                                                                                                                                                      |
| EPI_ISL_1747500, EPI_ISL_1747501, EPI_ISL_1747502                                                                                                                                                                                                                                                                                                                                                                                                                                                                                                                                                                                                                                     | Kantonsarztamt Solothurn                  | Clinical Bacteriology                                        | Tim Roloff, Fanny Wegner, Madlen Stange, Helena MB Seth-Smith, Alfredo Mari, Karoline Leuzinger, Julia Bielicki, Manuel Battegay, Lukas, Fenner, Hans Hirsch, Adrian Egli                                                                                                                                                                                                                                                                                              |
| EPI_ISL_1747503, EPI_ISL_1747504                                                                                                                                                                                                                                                                                                                                                                                                                                                                                                                                                                                                                                                      | Viollier AG                               | Clinical Bacteriology                                        | Tim Roloff, Madlen Stange, Helena MB Seth-Smith, Alfredo Mari, Karoline Leuzinger, Julia Bielicki, Christiane Beckmann, Manuel Battegay, Hans Hirsch, Adrian Egli                                                                                                                                                                                                                                                                                                      |
| EPI_ISL_1747505, EPI_ISL_1747506, EPI_ISL_1747507, EPI_ISL_1747508, EPI_ISL_1747509, EPI_ISL_1747510, EPI_ISL_1747511                                                                                                                                                                                                                                                                                                                                                                                                                                                                                                                                                                 | Kantonsarztamt Solothurn                  | Clinical Bacteriology                                        | Tim Roloff, Fanny Wegner, Madlen Stange, Helena MB Seth-Smith, Alfredo Mari, Karoline Leuzinger, Julia Bielicki, Manuel Battegay, Lukas, Fenner, Hans Hirsch, Adrian Egli                                                                                                                                                                                                                                                                                              |
| EPI_ISL_1747512                                                                                                                                                                                                                                                                                                                                                                                                                                                                                                                                                                                                                                                                       | Viollier AG                               | Clinical Bacteriology                                        | Tim Roloff, Madlen Stange, Helena MB Seth-Smith, Alfredo Mari, Karoline Leuzinger, Julia Bielicki, Christiane Beckmann, Manuel Battegay, Hans Hirsch, Adrian Egli                                                                                                                                                                                                                                                                                                      |
| EPI_ISL_1747513, EPI_ISL_1747514                                                                                                                                                                                                                                                                                                                                                                                                                                                                                                                                                                                                                                                      | Kantonsarztamt Solothurn                  | Clinical Bacteriology                                        | Tim Roloff, Fanny Wegner, Madlen Stange, Helena MB Seth-Smith, Alfredo Mari, Karoline Leuzinger, Julia Bielicki, Manuel Battegay, Lukas, Fenner, Hans Hirsch, Adrian Egli                                                                                                                                                                                                                                                                                              |
| EPI_ISL_1747517                                                                                                                                                                                                                                                                                                                                                                                                                                                                                                                                                                                                                                                                       | Viollier AG                               | Clinical Bacteriology                                        | Tim Roloff, Madlen Stange, Helena MB Seth-Smith, Alfredo Mari, Karoline Leuzinger, Julia Bielicki, Christiane Beckmann, Manuel Battegay, Hans Hirsch, Adrian Egli                                                                                                                                                                                                                                                                                                      |
| EPI_ISL_1747519, EPI_ISL_1747520, EPI_ISL_1747521, EPI_ISL_1747522, EPI_ISL_1747523, EPI_ISL_1747524, EPI_ISL_1747525, EPI_ISL_1747526, EPI_ISL_1747527, EPI_ISL_1747528, EPI_ISL_1747529, EPI_ISL_1747530, EPI_ISL_1747531                                                                                                                                                                                                                                                                                                                                                                                                                                                           | Kantonsarztamt Solothurn                  | Clinical Bacteriology                                        | Tim Roloff, Fanny Wegner, Madlen Stange, Helena MB Seth-Smith, Alfredo Mari, Karoline Leuzinger, Julia Bielicki, Manuel Battegay, Lukas, Fenner, Hans Hirsch, Adrian Egli                                                                                                                                                                                                                                                                                              |
| see above                                                                                                                                                                                                                                                                                                                                                                                                                                                                                                                                                                                                                                                                             | Kantonsarztamt Solothurn                  | Clinical Bacteriology                                        | Tim Roloff, Fanny Wegner, Madlen Stange, Helena MB Seth-Smith, Alfredo Mari, Karoline Leuzinger, Julia Bielicki, Manuel Battegay, Lukas, Fenner, Hans Hirsch, Adrian Egli                                                                                                                                                                                                                                                                                              |
| EPI_ISL_1747557, EPI_ISL_1747558, EPI_ISL_1747559, EPI_ISL_1747560, EPI_ISL_1747564, EPI_ISL_1747572, EPI_ISL_1747579, EPI_ISL_1747581, EPI_ISL_1747584, EPI_ISL_1747585, EPI_ISL_1747586, EPI_ISL_1747587, EPI_ISL_1747588, EPI_ISL_1747589, EPI_ISL_1747591, EPI_ISL_1747592, EPI_ISL_1747593, EPI_ISL_1747594, EPI_ISL_1747595, EPI_ISL_1747596, EPI_ISL_1747597, EPI_ISL_1747598, EPI_ISL_1747599, EPI_ISL_1747600, EPI_ISL_1747601, EPI_ISL_1747602, EPI_ISL_1747603, EPI_ISL_1747604, EPI_ISL_1747605, EPI_ISL_1747606, EPI_ISL_1747607, EPI_ISL_1747608, EPI_ISL_1747609, EPI_ISL_1747610                                                                                      | Viollier AG                               | Clinical Bacteriology                                        | Tim Roloff, Madlen Stange, Helena MB Seth-Smith, Alfredo Mari, Karoline Leuzinger, Julia Bielicki, Christiane Beckmann, Manuel Battegay, Hans Hirsch, Adrian Egli                                                                                                                                                                                                                                                                                                      |
| see above                                                                                                                                                                                                                                                                                                                                                                                                                                                                                                                                                                                                                                                                             | Viollier AG                               | Clinical Bacteriology                                        | Tim Roloff, Madlen Stange, Helena MB Seth-Smith, Alfredo Mari, Karoline Leuzinger, Julia Bielicki, Christiane Beckmann, Manuel Battegay, Hans Hirsch, Adrian Egli                                                                                                                                                                                                                                                                                                      |
| EPI_ISL_1747611                                                                                                                                                                                                                                                                                                                                                                                                                                                                                                                                                                                                                                                                       | Bioanalytika AG                           | Clinical Bacteriology                                        | Tim Roloff, Madlen Stange, Helena MB Seth-Smith, Alfredo Mari, Karoline Leuzinger, Julia Bielicki, Adrian Härrli, Manuel Battegay, Hans Hirsch, Adrian Egli                                                                                                                                                                                                                                                                                                            |
| EPI_ISL_1747612, EPI_ISL_1747613, EPI_ISL_1747614, EPI_ISL_1747615, EPI_ISL_1747616, EPI_ISL_1747617, EPI_ISL_1747618                                                                                                                                                                                                                                                                                                                                                                                                                                                                                                                                                                 | Viollier AG                               | Clinical Bacteriology                                        | Tim Roloff, Madlen Stange, Helena MB Seth-Smith, Alfredo Mari, Karoline Leuzinger, Julia Bielicki, Christiane Beckmann, Manuel Battegay, Hans Hirsch, Adrian Egli                                                                                                                                                                                                                                                                                                      |
| EPI_ISL_1747661                                                                                                                                                                                                                                                                                                                                                                                                                                                                                                                                                                                                                                                                       | Clinical Virology                         | Clinical Bacteriology                                        | Tim Roloff, Madlen Stange, Helena MB Seth-Smith, Alfredo Mari, Karoline Leuzinger, Julia Bielicki, Manuel Battegay, Hans Hirsch, Adrian Egli                                                                                                                                                                                                                                                                                                                           |
| EPI_ISL_1747667                                                                                                                                                                                                                                                                                                                                                                                                                                                                                                                                                                                                                                                                       | Rothen Medizinische Laboratorien AG       | Clinical Bacteriology                                        | Tim Roloff, Madlen Stange, Helena MB Seth-Smith, Alfredo Mari, Karoline Leuzinger, Julia Bielicki, Ingrid Steffen, Manuel Battegay, Hans Hirsch, Adrian Egli                                                                                                                                                                                                                                                                                                           |
| EPI_ISL_1747689, EPI_ISL_1747725, EPI_ISL_1747772, EPI_ISL_1914606, EPI_ISL_1914608, EPI_ISL_1993813, EPI_ISL_1993814, EPI_ISL_1993815, EPI_ISL_1993816, EPI_ISL_1993817, EPI_ISL_1993818, EPI_ISL_1993819, EPI_ISL_1993820, EPI_ISL_1993821                                                                                                                                                                                                                                                                                                                                                                                                                                          | Clinical Virology                         | Clinical Bacteriology                                        | Tim Roloff, Madlen Stange, Helena MB Seth-Smith, Alfredo Mari, Karoline Leuzinger, Julia Bielicki, Manuel Battegay, Hans Hirsch, Adrian Egli                                                                                                                                                                                                                                                                                                                           |
| see above                                                                                                                                                                                                                                                                                                                                                                                                                                                                                                                                                                                                                                                                             | Clinical Virology                         | Clinical Bacteriology                                        | Tim Roloff, Madlen Stange, Helena MB Seth-Smith, Alfredo Mari, Karoline Leuzinger, Julia Bielicki, Manuel Battegay, Hans Hirsch, Adrian Egli                                                                                                                                                                                                                                                                                                                           |
| EPI_ISL_1993822, EPI_ISL_1993823, EPI_ISL_1993824, EPI_ISL_1993825, EPI_ISL_1993826, EPI_ISL_1993827                                                                                                                                                                                                                                                                                                                                                                                                                                                                                                                                                                                  | Rothen Medizinische Laboratorien AG       | Clinical Bacteriology                                        | Tim Roloff, Madlen Stange, Helena MB Seth-Smith, Alfredo Mari, Karoline Leuzinger, Julia Bielicki, Ingrid Steffen, Manuel Battegay, Hans Hirsch, Adrian Egli                                                                                                                                                                                                                                                                                                           |
| EPI_ISL_1993828                                                                                                                                                                                                                                                                                                                                                                                                                                                                                                                                                                                                                                                                       | Clinical Virology                         | Clinical Bacteriology                                        | Tim Roloff, Madlen Stange, Helena MB Seth-Smith, Alfredo Mari, Karoline Leuzinger, Julia Bielicki, Manuel Battegay, Hans Hirsch, Adrian Egli                                                                                                                                                                                                                                                                                                                           |
| EPI_ISL_1993829, EPI_ISL_1993830                                                                                                                                                                                                                                                                                                                                                                                                                                                                                                                                                                                                                                                      | Rothen Medizinische Laboratorien AG       | Clinical Bacteriology                                        | Tim Roloff, Madlen Stange, Helena MB Seth-Smith, Alfredo Mari, Karoline Leuzinger, Julia Bielicki, Ingrid Steffen, Manuel Battegay, Hans Hirsch, Adrian Egli                                                                                                                                                                                                                                                                                                           |
| EPI_ISL_1993831, EPI_ISL_1993861, EPI_ISL_1993862, EPI_ISL_1993863, EPI_ISL_1993864, EPI_ISL_1993865, EPI_ISL_1993866, EPI_ISL_1993876, EPI_ISL_1993877, EPI_ISL_1993878, EPI_ISL_1993879, EPI_ISL_1993880, EPI_ISL_1993881, EPI_ISL_1993882, EPI_ISL_1993919                                                                                                                                                                                                                                                                                                                                                                                                                         | Clinical Virology                         | Clinical Bacteriology                                        | Tim Roloff, Madlen Stange, Helena MB Seth-Smith, Alfredo Mari, Karoline Leuzinger, Julia Bielicki, Manuel Battegay, Hans Hirsch, Adrian Egli                                                                                                                                                                                                                                                                                                                           |
| see above                                                                                                                                                                                                                                                                                                                                                                                                                                                                                                                                                                                                                                                                             | Clinical Virology                         | Clinical Bacteriology                                        | Tim Roloff, Madlen Stange, Helena MB Seth-Smith, Alfredo Mari, Karoline Leuzinger, Julia Bielicki, Manuel Battegay, Hans Hirsch, Adrian Egli                                                                                                                                                                                                                                                                                                                           |
| EPI_ISL_981550, EPI_ISL_981551, EPI_ISL_981553, EPI_ISL_981554, EPI_ISL_981555, EPI_ISL_981557, EPI_ISL_981559, EPI_ISL_981598, EPI_ISL_981599, EPI_ISL_981600, EPI_ISL_981601, EPI_ISL_981602, EPI_ISL_981603, EPI_ISL_981604, EPI_ISL_981605, EPI_ISL_981606, EPI_ISL_981607, EPI_ISL_981608, EPI_ISL_981609, EPI_ISL_981610, EPI_ISL_981611, EPI_ISL_981612, EPI_ISL_981613, EPI_ISL_981614, EPI_ISL_981615, EPI_ISL_981616, EPI_ISL_981617, EPI_ISL_981618, EPI_ISL_981619, EPI_ISL_981620, EPI_ISL_981621, EPI_ISL_981622, EPI_ISL_981623, EPI_ISL_981624, EPI_ISL_981625, EPI_ISL_981626                                                                                        | Clinical Virology                         | Clinical Bacteriology                                        | Tim Roloff, Madlen Stange, Helena MB Seth-Smith, Alfredo Mari, Karoline Leuzinger, Julia Bielicki, Manuel Battegay, Hans Hirsch, Adrian Egli                                                                                                                                                                                                                                                                                                                           |

EPI\_ISL\_981627, EPI\_ISL\_981628, EPI\_ISL\_981629, EPI\_ISL\_981630, EPI\_ISL\_981631, EPI\_ISL\_981632, EPI\_ISL\_981633, EPI\_ISL\_981634, EPI\_ISL\_981635, EPI\_ISL\_981636, EPI\_ISL\_981637, EPI\_ISL\_981638, EPI\_ISL\_981639, EPI\_ISL\_981640, EPI\_ISL\_981641, EPI\_ISL\_981643, EPI\_ISL\_981644, EPI\_ISL\_981645, EPI\_ISL\_981646, EPI\_ISL\_981647, EPI\_ISL\_981648, EPI\_ISL\_981649, EPI\_ISL\_981662, EPI\_ISL\_981684, EPI\_ISL\_981685, EPI\_ISL\_981686, EPI\_ISL\_981687, EPI\_ISL\_981688, EPI\_ISL\_981689, EPI\_ISL\_981690, EPI\_ISL\_981691, EPI\_ISL\_981692, EPI\_ISL\_981693, EPI\_ISL\_981694, EPI\_ISL\_981695, EPI\_ISL\_981696, EPI\_ISL\_981697, EPI\_ISL\_981698, EPI\_ISL\_981699, EPI\_ISL\_981703, EPI\_ISL\_981705, EPI\_ISL\_981710, EPI\_ISL\_981711, EPI\_ISL\_981712, EPI\_ISL\_981718, EPI\_ISL\_981720, EPI\_ISL\_981790, EPI\_ISL\_981791, EPI\_ISL\_981792, EPI\_ISL\_981793, EPI\_ISL\_981794, EPI\_ISL\_981795, EPI\_ISL\_981796, EPI\_ISL\_981797, EPI\_ISL\_981798, EPI\_ISL\_981799, EPI\_ISL\_981801, EPI\_ISL\_981802, EPI\_ISL\_981803, EPI\_ISL\_981804, EPI\_ISL\_981805, EPI\_ISL\_981806, EPI\_ISL\_981807, EPI\_ISL\_981808, EPI\_ISL\_981809, EPI\_ISL\_981810, EPI\_ISL\_981811, EPI\_ISL\_981812, EPI\_ISL\_981814, EPI\_ISL\_981815, EPI\_ISL\_981816, EPI\_ISL\_981817, EPI\_ISL\_981818, EPI\_ISL\_981819, EPI\_ISL\_981820, EPI\_ISL\_981821, EPI\_ISL\_981822, EPI\_ISL\_981823, EPI\_ISL\_981824, EPI\_ISL\_981825, EPI\_ISL\_981826, EPI\_ISL\_981833, EPI\_ISL\_981834, EPI\_ISL\_981835, EPI\_ISL\_981836, EPI\_ISL\_981849

see above

University Hospitals of Geneva, Laboratory of Virology

HUG, Laboratory of Virology and the Health2030 Genome Center

Samuel Cordey, Ana Rita Goncalves, Laurent Kaiser, Lorenzo Cerutti, Henri Pegeot, Melyssa Elies, Deborah Penet, Keith Harshman, Ioannis Xenarios, Emmanouil Dermitzakis







































































|                                                                                                                                                                                                                                                                                                                                                                                                                                                                                                                                                                                                                                                                                                                                                                                                              |                                                        |                                                              |                                                                                                                                                                                                                                                                                                                                                                                                                                                                         |
|--------------------------------------------------------------------------------------------------------------------------------------------------------------------------------------------------------------------------------------------------------------------------------------------------------------------------------------------------------------------------------------------------------------------------------------------------------------------------------------------------------------------------------------------------------------------------------------------------------------------------------------------------------------------------------------------------------------------------------------------------------------------------------------------------------------|--------------------------------------------------------|--------------------------------------------------------------|-------------------------------------------------------------------------------------------------------------------------------------------------------------------------------------------------------------------------------------------------------------------------------------------------------------------------------------------------------------------------------------------------------------------------------------------------------------------------|
| EPI_ISL_1545184                                                                                                                                                                                                                                                                                                                                                                                                                                                                                                                                                                                                                                                                                                                                                                                              | CHUV                                                   | Laboratory of genomics and metagenomics                      | Trestan Pillonel, Damien Jacot, Sébastien Aeby, Gilbert Greub, Claire Bertelli                                                                                                                                                                                                                                                                                                                                                                                          |
| EPI_ISL_1545185, EPI_ISL_1545186                                                                                                                                                                                                                                                                                                                                                                                                                                                                                                                                                                                                                                                                                                                                                                             | EHNV                                                   | Laboratory of genomics and metagenomics                      | Trestan Pillonel, Damien Jacot, Sébastien Aeby, Gilbert Greub, Claire Bertelli                                                                                                                                                                                                                                                                                                                                                                                          |
| EPI_ISL_1545187                                                                                                                                                                                                                                                                                                                                                                                                                                                                                                                                                                                                                                                                                                                                                                                              | CHUV                                                   | Laboratory of genomics and metagenomics                      | Trestan Pillonel, Damien Jacot, Sébastien Aeby, Gilbert Greub, Claire Bertelli                                                                                                                                                                                                                                                                                                                                                                                          |
| EPI_ISL_1545189                                                                                                                                                                                                                                                                                                                                                                                                                                                                                                                                                                                                                                                                                                                                                                                              | EHNV                                                   | Laboratory of genomics and metagenomics                      | Trestan Pillonel, Damien Jacot, Sébastien Aeby, Gilbert Greub, Claire Bertelli                                                                                                                                                                                                                                                                                                                                                                                          |
| EPI_ISL_1545190, EPI_ISL_1545191, EPI_ISL_1545192, EPI_ISL_1545193, EPI_ISL_1545194, EPI_ISL_1545195, EPI_ISL_1545196, EPI_ISL_1545197, EPI_ISL_1545198, EPI_ISL_1545199, EPI_ISL_1545200, EPI_ISL_1545201, EPI_ISL_1545202, EPI_ISL_1545203, EPI_ISL_1545204, EPI_ISL_1545205, EPI_ISL_1545206, EPI_ISL_1545208, EPI_ISL_1545209, EPI_ISL_1545210, EPI_ISL_1545211, EPI_ISL_1545212, EPI_ISL_1545215, EPI_ISL_1545216, EPI_ISL_1545217, EPI_ISL_1545218, EPI_ISL_1545219, EPI_ISL_1545226                                                                                                                                                                                                                                                                                                                   | CHUV                                                   | Laboratory of genomics and metagenomics                      | Trestan Pillonel, Damien Jacot, Sébastien Aeby, Gilbert Greub, Claire Bertelli                                                                                                                                                                                                                                                                                                                                                                                          |
| see above                                                                                                                                                                                                                                                                                                                                                                                                                                                                                                                                                                                                                                                                                                                                                                                                    | CHUV                                                   | Laboratory of genomics and metagenomics                      | Trestan Pillonel, Damien Jacot, Sébastien Aeby, Gilbert Greub, Claire Bertelli                                                                                                                                                                                                                                                                                                                                                                                          |
| EPI_ISL_1545248, EPI_ISL_1545249, EPI_ISL_1545250, EPI_ISL_1545252, EPI_ISL_1545254                                                                                                                                                                                                                                                                                                                                                                                                                                                                                                                                                                                                                                                                                                                          | EHC MORGES                                             | Laboratory of genomics and metagenomics                      | Trestan Pillonel, Damien Jacot, Sébastien Aeby, Gilbert Greub, Claire Bertelli                                                                                                                                                                                                                                                                                                                                                                                          |
| EPI_ISL_1545257                                                                                                                                                                                                                                                                                                                                                                                                                                                                                                                                                                                                                                                                                                                                                                                              | CHUV                                                   | Laboratory of genomics and metagenomics                      | Trestan Pillonel, Damien Jacot, Sébastien Aeby, Gilbert Greub, Claire Bertelli                                                                                                                                                                                                                                                                                                                                                                                          |
| EPI_ISL_1545260, EPI_ISL_1545261                                                                                                                                                                                                                                                                                                                                                                                                                                                                                                                                                                                                                                                                                                                                                                             | Dr. Borel                                              | Laboratory of genomics and metagenomics                      | Trestan Pillonel, Damien Jacot, Sébastien Aeby, Gilbert Greub, Claire Bertelli                                                                                                                                                                                                                                                                                                                                                                                          |
| EPI_ISL_1546044, EPI_ISL_1546046, EPI_ISL_1546048, EPI_ISL_1546051, EPI_ISL_1546053, EPI_ISL_1546055, EPI_ISL_1546057, EPI_ISL_1546060, EPI_ISL_1546062, EPI_ISL_1546064, EPI_ISL_1546066, EPI_ISL_1546068, EPI_ISL_1546070, EPI_ISL_1546073, EPI_ISL_1546075, EPI_ISL_1546077, EPI_ISL_1546079, EPI_ISL_1546082, EPI_ISL_1546084, EPI_ISL_1546086, EPI_ISL_1546087, EPI_ISL_1546088, EPI_ISL_1546089, EPI_ISL_1546090, EPI_ISL_1546091, EPI_ISL_1546094, EPI_ISL_1546096, EPI_ISL_1546098                                                                                                                                                                                                                                                                                                                   | Center for Laboratory Medicine St. Gallen              | Center for Laboratory Medicine St. Gallen                    | Yannick Gerth                                                                                                                                                                                                                                                                                                                                                                                                                                                           |
| see above                                                                                                                                                                                                                                                                                                                                                                                                                                                                                                                                                                                                                                                                                                                                                                                                    | Center for Laboratory Medicine St. Gallen              | Center for Laboratory Medicine St. Gallen                    | Yannick Gerth                                                                                                                                                                                                                                                                                                                                                                                                                                                           |
| EPI_ISL_1547472, EPI_ISL_1547473, EPI_ISL_1547475, EPI_ISL_1547477, EPI_ISL_1547478, EPI_ISL_1547479, EPI_ISL_1547480, EPI_ISL_1547481, EPI_ISL_1547482, EPI_ISL_1547483, EPI_ISL_1547484, EPI_ISL_1547485, EPI_ISL_1547486, EPI_ISL_1547487, EPI_ISL_1547488, EPI_ISL_1547489, EPI_ISL_1547490, EPI_ISL_1547491, EPI_ISL_1547492, EPI_ISL_1547493, EPI_ISL_1547494, EPI_ISL_1547498, EPI_ISL_1547499, EPI_ISL_1547500, EPI_ISL_1547501                                                                                                                                                                                                                                                                                                                                                                      | University Hospitals of Geneva, Laboratory of Virology | HUG, Laboratory of Virology and the Health2030 Genome Center | Samuel Cordey, Ana Rita Goncalves, Laurent Kaiser, Lorenzo Cerutti, Henri Pegeot, Melyssa Elies, Deborah Penet, Keith Harshman, Ioannis Xenarios, Emmanouil Dermitzakis                                                                                                                                                                                                                                                                                                 |
| see above                                                                                                                                                                                                                                                                                                                                                                                                                                                                                                                                                                                                                                                                                                                                                                                                    | University Hospitals of Geneva, Laboratory of Virology | HUG, Laboratory of Virology and the Health2030 Genome Center | Samuel Cordey, Ana Rita Goncalves, Laurent Kaiser, Lorenzo Cerutti, Henri Pegeot, Melyssa Elies, Deborah Penet, Keith Harshman, Ioannis Xenarios, Emmanouil Dermitzakis                                                                                                                                                                                                                                                                                                 |
| EPI_ISL_1575927, EPI_ISL_1575930, EPI_ISL_1575932, EPI_ISL_1575935, EPI_ISL_1575938, EPI_ISL_1575941, EPI_ISL_1575943, EPI_ISL_1575947, EPI_ISL_1575948, EPI_ISL_1575950, EPI_ISL_1575952, EPI_ISL_1575955, EPI_ISL_1575957, EPI_ISL_1575959, EPI_ISL_1575961, EPI_ISL_1575963, EPI_ISL_1575964, EPI_ISL_1575966, EPI_ISL_1575968, EPI_ISL_1575971, EPI_ISL_1575974, EPI_ISL_1575976, EPI_ISL_1575979, EPI_ISL_1575982, EPI_ISL_1575984, EPI_ISL_1575987, EPI_ISL_1575990, EPI_ISL_1575993, EPI_ISL_1575996, EPI_ISL_1576001, EPI_ISL_1576003, EPI_ISL_1576004, EPI_ISL_1576007, EPI_ISL_1576010, EPI_ISL_1576012, EPI_ISL_1576015, EPI_ISL_1576018, EPI_ISL_1576021, EPI_ISL_1576023, EPI_ISL_1576025, EPI_ISL_1576027, EPI_ISL_1576029, EPI_ISL_1576031, EPI_ISL_1576033, EPI_ISL_1576036, EPI_ISL_1576039 | Laboratorio di Microbiologia                           | Laboratorio di Microbiologia                                 | Martinetti Lucchini Gladys, Valeria Spina                                                                                                                                                                                                                                                                                                                                                                                                                               |
| see above                                                                                                                                                                                                                                                                                                                                                                                                                                                                                                                                                                                                                                                                                                                                                                                                    | Laboratorio di Microbiologia                           | Laboratorio di Microbiologia                                 | Martinetti Lucchini Gladys, Valeria Spina                                                                                                                                                                                                                                                                                                                                                                                                                               |
| EPI_ISL_1594306, EPI_ISL_1594307, EPI_ISL_1594308, EPI_ISL_1594309, EPI_ISL_1594310, EPI_ISL_1594311, EPI_ISL_1594312, EPI_ISL_1594313, EPI_ISL_1594314, EPI_ISL_1594315, EPI_ISL_1594316                                                                                                                                                                                                                                                                                                                                                                                                                                                                                                                                                                                                                    | Center for Laboratory Medicine St. Gallen              | Center for Laboratory Medicine St. Gallen                    | Yannick Gerth                                                                                                                                                                                                                                                                                                                                                                                                                                                           |
| see above                                                                                                                                                                                                                                                                                                                                                                                                                                                                                                                                                                                                                                                                                                                                                                                                    | Center for Laboratory Medicine St. Gallen              | Center for Laboratory Medicine St. Gallen                    | Yannick Gerth                                                                                                                                                                                                                                                                                                                                                                                                                                                           |
| EPI_ISL_1594317                                                                                                                                                                                                                                                                                                                                                                                                                                                                                                                                                                                                                                                                                                                                                                                              | Center for Laboratory Medicine                         | Center for Laboratory Medicine                               | Yannick Gerth                                                                                                                                                                                                                                                                                                                                                                                                                                                           |
| EPI_ISL_1594318, EPI_ISL_1594319, EPI_ISL_1594320, EPI_ISL_1594321, EPI_ISL_1594322, EPI_ISL_1594323, EPI_ISL_1594324, EPI_ISL_1594325, EPI_ISL_1594326, EPI_ISL_1594327, EPI_ISL_1594328, EPI_ISL_1594329, EPI_ISL_1594330, EPI_ISL_1594331, EPI_ISL_1594332, EPI_ISL_1594333, EPI_ISL_1594334, EPI_ISL_1594335                                                                                                                                                                                                                                                                                                                                                                                                                                                                                             | Center for Laboratory Medicine St. Gallen              | Center for Laboratory Medicine St. Gallen                    | Yannick Gerth                                                                                                                                                                                                                                                                                                                                                                                                                                                           |
| see above                                                                                                                                                                                                                                                                                                                                                                                                                                                                                                                                                                                                                                                                                                                                                                                                    | Center for Laboratory Medicine St. Gallen              | Center for Laboratory Medicine St. Gallen                    | Yannick Gerth                                                                                                                                                                                                                                                                                                                                                                                                                                                           |
| EPI_ISL_1594336                                                                                                                                                                                                                                                                                                                                                                                                                                                                                                                                                                                                                                                                                                                                                                                              | Center for Laboratory Medicine                         | Center for Laboratory Medicine                               | Yannick Gerth                                                                                                                                                                                                                                                                                                                                                                                                                                                           |
| EPI_ISL_1594337                                                                                                                                                                                                                                                                                                                                                                                                                                                                                                                                                                                                                                                                                                                                                                                              | Center for Laboratory Medicine St. Gallen              | Center for Laboratory Medicine St. Gallen                    | Yannick Gerth                                                                                                                                                                                                                                                                                                                                                                                                                                                           |
| EPI_ISL_1594338                                                                                                                                                                                                                                                                                                                                                                                                                                                                                                                                                                                                                                                                                                                                                                                              | Center for Laboratory Medicine                         | Center for Laboratory Medicine                               | Yannick Gerth                                                                                                                                                                                                                                                                                                                                                                                                                                                           |
| EPI_ISL_1594339, EPI_ISL_1594340, EPI_ISL_1594341, EPI_ISL_1594342, EPI_ISL_1594343, EPI_ISL_1594344, EPI_ISL_1594345, EPI_ISL_1594347, EPI_ISL_1594348, EPI_ISL_1594349, EPI_ISL_1594350, EPI_ISL_1594351, EPI_ISL_1594352, EPI_ISL_1594353, EPI_ISL_1594354, EPI_ISL_1594355                                                                                                                                                                                                                                                                                                                                                                                                                                                                                                                               | Center for Laboratory Medicine St. Gallen              | Center for Laboratory Medicine St. Gallen                    | Yannick Gerth                                                                                                                                                                                                                                                                                                                                                                                                                                                           |
| see above                                                                                                                                                                                                                                                                                                                                                                                                                                                                                                                                                                                                                                                                                                                                                                                                    | Center for Laboratory Medicine St. Gallen              | Center for Laboratory Medicine St. Gallen                    | Yannick Gerth                                                                                                                                                                                                                                                                                                                                                                                                                                                           |
| EPI_ISL_1597860, EPI_ISL_1597861, EPI_ISL_1597862, EPI_ISL_1597865, EPI_ISL_1597866, EPI_ISL_1597867, EPI_ISL_1597868, EPI_ISL_1597869                                                                                                                                                                                                                                                                                                                                                                                                                                                                                                                                                                                                                                                                       | Viollier AG                                            | Department of Biosystems Science and Engineering, ETH Zürich | Chaoran Chen, Sarah Nadeau, Catharine Aquino, Ivan Topolsky, Philipp Jablonski, Lara Fuhrmann, David Dreifuss, Katharina Jahn, Andrea Cabral de Gouvea, Maria Domenica Moccia, Simon Grüter, Timothy Sykes, Lennart Opitz, Griffin White, Laura Neff, Doris Popovic, Andrea Patrignani, Jay Tracy, Ralph Schlapbach, Christiane Beckmann, Maurice Redondo, Olivier Kobel, Christoph Noppen, Sophie Seidel, Noemie Santamaria de Souza, Niko Beerenwinkel, Tanja Stadler |
| EPI_ISL_1597870                                                                                                                                                                                                                                                                                                                                                                                                                                                                                                                                                                                                                                                                                                                                                                                              | Viollier AG                                            | Department of Biosystems Science and Engineering, ETH Zürich | Chaoran Chen, Sarah Nadeau, Ivan Topolsky, Emmanouil Dermitzakis, Keith Harshman, Ioannis Xenarios, Henri Pegeot, Lorenzo Cerutti, Deborah Penet, Philipp Jablonski, Lara Fuhrmann, David Dreifuss, Katharina Jahn, Christiane Beckmann, Maurice Redondo, Olivier Kobel, Christoph Noppen, Sophie Seidel, Noemie Santamaria de Souza, Niko Beerenwinkel, Tanja Stadler                                                                                                  |
| EPI_ISL_1597871, EPI_ISL_1597873, EPI_ISL_1597875, EPI_ISL_1597876, EPI_ISL_1597880, EPI_ISL_1597881, EPI_ISL_1597885, EPI_ISL_1597886, EPI_ISL_1597890, EPI_ISL_1597891, EPI_ISL_1597892, EPI_ISL_1597893, EPI_ISL_1597894, EPI_ISL_1597916                                                                                                                                                                                                                                                                                                                                                                                                                                                                                                                                                                 | Viollier AG                                            | Department of Biosystems Science and Engineering, ETH Zürich | Chaoran Chen, Sarah Nadeau, Catharine Aquino, Ivan Topolsky, Philipp Jablonski, Lara Fuhrmann, David Dreifuss, Katharina Jahn, Andrea Cabral de Gouvea, Maria Domenica Moccia, Simon Grüter, Timothy Sykes, Lennart Opitz, Griffin White, Laura Neff, Doris Popovic, Andrea Patrignani, Jay Tracy, Ralph Schlapbach, Christiane Beckmann, Maurice Redondo, Olivier Kobel, Christoph Noppen, Sophie Seidel, Noemie Santamaria de Souza, Niko Beerenwinkel, Tanja Stadler |
| see above                                                                                                                                                                                                                                                                                                                                                                                                                                                                                                                                                                                                                                                                                                                                                                                                    | Viollier AG                                            | Department of Biosystems Science and Engineering, ETH Zürich | Chaoran Chen, Sarah Nadeau, Catharine Aquino, Ivan Topolsky, Philipp Jablonski, Lara Fuhrmann, David Dreifuss, Katharina Jahn, Andrea Cabral de Gouvea, Maria Domenica Moccia, Simon Grüter, Timothy Sykes, Lennart Opitz, Griffin White, Laura Neff, Doris Popovic, Andrea Patrignani, Jay Tracy, Ralph Schlapbach, Christiane Beckmann, Maurice Redondo, Olivier Kobel, Christoph Noppen, Sophie Seidel, Noemie Santamaria de Souza, Niko Beerenwinkel, Tanja Stadler |
| EPI_ISL_1597917                                                                                                                                                                                                                                                                                                                                                                                                                                                                                                                                                                                                                                                                                                                                                                                              | Viollier AG                                            | Department of Biosystems Science and Engineering, ETH Zürich | Christian Beisel, Sarah Nadeau, Chaoran Chen, Ivan Topolsky, Philipp Jablonski, Lara Fuhrmann, David Dreifuss, Katharina Jahn, Rebecca Denes, Mirjam Feldkamp, Ina Nissen, Natascha Santacroce, Elodie Burcklen, Christiane Beckmann, Maurice Redondo, Olivier Kobel, Christoph Noppen, Sophie Seidel, Noemie Santamaria de Souza, Niko Beerenwinkel, Tanja Stadler                                                                                                     |
| EPI_ISL_1597918, EPI_ISL_1597919, EPI_ISL_1597923, EPI_ISL_1597924, EPI_ISL_1597925, EPI_ISL_1597926, EPI_ISL_1597928, EPI_ISL_1597929, EPI_ISL_1597930, EPI_ISL_1597931, EPI_ISL_1597932, EPI_ISL_1597933, EPI_ISL_1597934, EPI_ISL_1597935, EPI_ISL_1597937                                                                                                                                                                                                                                                                                                                                                                                                                                                                                                                                                | Viollier AG                                            | Department of Biosystems Science and Engineering, ETH Zürich | Chaoran Chen, Sarah Nadeau, Catharine Aquino, Ivan Topolsky, Philipp Jablonski, Lara Fuhrmann, David Dreifuss, Katharina Jahn, Andrea Cabral de Gouvea, Maria Domenica Moccia, Simon Grüter, Timothy Sykes, Lennart Opitz, Griffin White, Laura Neff, Doris Popovic, Andrea Patrignani, Jay Tracy, Ralph Schlapbach, Christiane Beckmann, Maurice Redondo, Olivier Kobel, Christoph Noppen, Sophie Seidel, Noemie Santamaria de Souza, Niko Beerenwinkel, Tanja Stadler |
| see above                                                                                                                                                                                                                                                                                                                                                                                                                                                                                                                                                                                                                                                                                                                                                                                                    | Viollier AG                                            | Department of Biosystems Science and Engineering, ETH Zürich | Chaoran Chen, Sarah Nadeau, Catharine Aquino, Ivan Topolsky, Philipp Jablonski, Lara Fuhrmann, David Dreifuss, Katharina Jahn, Andrea Cabral de Gouvea, Maria Domenica Moccia, Simon Grüter, Timothy Sykes, Lennart Opitz, Griffin White, Laura Neff, Doris Popovic, Andrea Patrignani, Jay Tracy, Ralph Schlapbach, Christiane Beckmann, Maurice Redondo, Olivier Kobel, Christoph Noppen, Sophie Seidel, Noemie Santamaria de Souza, Niko Beerenwinkel, Tanja Stadler |
| EPI_ISL_1597938                                                                                                                                                                                                                                                                                                                                                                                                                                                                                                                                                                                                                                                                                                                                                                                              | Viollier AG                                            | Department of Biosystems Science and Engineering, ETH Zürich | Chaoran Chen, Sarah Nadeau, Ivan Topolsky, Emmanouil Dermitzakis, Keith Harshman, Ioannis Xenarios, Henri Pegeot, Lorenzo Cerutti, Deborah Penet, Philipp Jablonski, Lara Fuhrmann, David Dreifuss, Katharina Jahn, Christiane Beckmann, Maurice Redondo, Olivier Kobel, Christoph Noppen, Sophie Seidel, Noemie Santamaria de Souza, Niko Beerenwinkel, Tanja Stadler                                                                                                  |
| EPI_ISL_1597939, EPI_ISL_1597940, EPI_ISL_1597941, EPI_ISL_1597942                                                                                                                                                                                                                                                                                                                                                                                                                                                                                                                                                                                                                                                                                                                                           | Viollier AG                                            | Department of Biosystems Science and Engineering, ETH Zürich | Chaoran Chen, Sarah Nadeau, Catharine Aquino, Ivan Topolsky, Philipp Jablonski, Lara Fuhrmann, David Dreifuss, Katharina Jahn, Andrea Cabral de Gouvea, Maria Domenica Moccia, Simon Grüter, Timothy Sykes, Lennart Opitz, Griffin White, Laura Neff, Doris Popovic, Andrea Patrignani, Jay Tracy, Ralph Schlapbach, Christiane Beckmann, Maurice Redondo, Olivier Kobel, Christoph Noppen, Sophie Seidel, Noemie Santamaria de Souza, Niko Beerenwinkel, Tanja Stadler |
| EPI_ISL_1597943                                                                                                                                                                                                                                                                                                                                                                                                                                                                                                                                                                                                                                                                                                                                                                                              | Viollier AG                                            | Department of Biosystems Science and Engineering, ETH Zürich | Chaoran Chen, Sarah Nadeau, Ivan Topolsky, Emmanouil Dermitzakis, Keith Harshman, Ioannis Xenarios, Henri Pegeot, Lorenzo Cerutti, Deborah Penet, Philipp Jablonski, Lara Fuhrmann, David Dreifuss, Katharina Jahn, Christiane Beckmann, Maurice Redondo, Olivier Kobel, Christoph Noppen, Sophie Seidel, Noemie Santamaria de Souza, Niko Beerenwinkel, Tanja Stadler                                                                                                  |
| EPI_ISL_1597944, EPI_ISL_1597947, EPI_ISL_1597948, EPI_ISL_1597949, EPI_ISL_1597950, EPI_ISL_1597951, EPI_ISL_1597953, EPI_ISL_1597955                                                                                                                                                                                                                                                                                                                                                                                                                                                                                                                                                                                                                                                                       | Viollier AG                                            | Department of Biosystems Science and Engineering, ETH Zürich | Chaoran Chen, Sarah Nadeau, Catharine Aquino, Ivan Topolsky, Philipp Jablonski, Lara Fuhrmann, David Dreifuss, Katharina Jahn, Andrea Cabral de Gouvea, Maria Domenica Moccia, Simon Grüter, Timothy Sykes, Lennart Opitz, Griffin White, Laura Neff, Doris Popovic, Andrea Patrignani, Jay Tracy, Ralph Schlapbach, Christiane Beckmann, Maurice Redondo, Olivier Kobel, Christoph Noppen, Sophie Seidel, Noemie Santamaria de Souza, Niko Beerenwinkel, Tanja Stadler |



















































|                                                                                                                                                                                                                                                                                                                                                                                                                                                                                                                                                                                                                                                                                                                                                                                                                                                                                                                                                                                                                                                                                                                                                                                                                                                                                                                                                                                                                                                                                                                                                                                                                                                                                                                                                                                                                                                                                                                                                                                                                                                                                                                                                                                                                                                                                                                                                                                                        |                          |                                                              |                                                                                                                                                                                                                                                                                                                                                                                                                                                                       |
|--------------------------------------------------------------------------------------------------------------------------------------------------------------------------------------------------------------------------------------------------------------------------------------------------------------------------------------------------------------------------------------------------------------------------------------------------------------------------------------------------------------------------------------------------------------------------------------------------------------------------------------------------------------------------------------------------------------------------------------------------------------------------------------------------------------------------------------------------------------------------------------------------------------------------------------------------------------------------------------------------------------------------------------------------------------------------------------------------------------------------------------------------------------------------------------------------------------------------------------------------------------------------------------------------------------------------------------------------------------------------------------------------------------------------------------------------------------------------------------------------------------------------------------------------------------------------------------------------------------------------------------------------------------------------------------------------------------------------------------------------------------------------------------------------------------------------------------------------------------------------------------------------------------------------------------------------------------------------------------------------------------------------------------------------------------------------------------------------------------------------------------------------------------------------------------------------------------------------------------------------------------------------------------------------------------------------------------------------------------------------------------------------------|--------------------------|--------------------------------------------------------------|-----------------------------------------------------------------------------------------------------------------------------------------------------------------------------------------------------------------------------------------------------------------------------------------------------------------------------------------------------------------------------------------------------------------------------------------------------------------------|
| EPI_ISL_1748280                                                                                                                                                                                                                                                                                                                                                                                                                                                                                                                                                                                                                                                                                                                                                                                                                                                                                                                                                                                                                                                                                                                                                                                                                                                                                                                                                                                                                                                                                                                                                                                                                                                                                                                                                                                                                                                                                                                                                                                                                                                                                                                                                                                                                                                                                                                                                                                        | Kantonsarztamt Solothurn | Clinical Bacteriology                                        | Tim Roloff, Fanny Wegner, Madlen Stange, Helena MB Seth-Smith, Alfredo Mari, Karoline Leuzinger, Julia Bielicki, Manuel Battegay, Lukas, Fenner, Hans Hirsch, Adrian Egli                                                                                                                                                                                                                                                                                             |
| EPI_ISL_1748282, EPI_ISL_1748285                                                                                                                                                                                                                                                                                                                                                                                                                                                                                                                                                                                                                                                                                                                                                                                                                                                                                                                                                                                                                                                                                                                                                                                                                                                                                                                                                                                                                                                                                                                                                                                                                                                                                                                                                                                                                                                                                                                                                                                                                                                                                                                                                                                                                                                                                                                                                                       | Viollier AG              | Clinical Bacteriology                                        | Tim Roloff, Madlen Stange, Helena MB Seth-Smith, Alfredo Mari, Karoline Leuzinger, Julia Bielicki, Christiane Beckmann, Manuel Battegay, Hans Hirsch, Adrian Egli                                                                                                                                                                                                                                                                                                     |
| EPI_ISL_1748287, EPI_ISL_1748290                                                                                                                                                                                                                                                                                                                                                                                                                                                                                                                                                                                                                                                                                                                                                                                                                                                                                                                                                                                                                                                                                                                                                                                                                                                                                                                                                                                                                                                                                                                                                                                                                                                                                                                                                                                                                                                                                                                                                                                                                                                                                                                                                                                                                                                                                                                                                                       | Clinical Virology        | Clinical Bacteriology                                        | Tim Roloff, Madlen Stange, Helena MB Seth-Smith, Alfredo Mari, Karoline Leuzinger, Julia Bielicki, Manuel Battegay, Hans Hirsch, Adrian Egli                                                                                                                                                                                                                                                                                                                          |
| EPI_ISL_1748292                                                                                                                                                                                                                                                                                                                                                                                                                                                                                                                                                                                                                                                                                                                                                                                                                                                                                                                                                                                                                                                                                                                                                                                                                                                                                                                                                                                                                                                                                                                                                                                                                                                                                                                                                                                                                                                                                                                                                                                                                                                                                                                                                                                                                                                                                                                                                                                        | Kantonsarztamt Solothurn | Clinical Bacteriology                                        | Tim Roloff, Fanny Wegner, Madlen Stange, Helena MB Seth-Smith, Alfredo Mari, Karoline Leuzinger, Julia Bielicki, Manuel Battegay, Lukas, Fenner, Hans Hirsch, Adrian Egli                                                                                                                                                                                                                                                                                             |
| EPI_ISL_1748295                                                                                                                                                                                                                                                                                                                                                                                                                                                                                                                                                                                                                                                                                                                                                                                                                                                                                                                                                                                                                                                                                                                                                                                                                                                                                                                                                                                                                                                                                                                                                                                                                                                                                                                                                                                                                                                                                                                                                                                                                                                                                                                                                                                                                                                                                                                                                                                        | Clinical Virology        | Clinical Bacteriology                                        | Tim Roloff, Madlen Stange, Helena MB Seth-Smith, Alfredo Mari, Karoline Leuzinger, Julia Bielicki, Manuel Battegay, Hans Hirsch, Adrian Egli                                                                                                                                                                                                                                                                                                                          |
| EPI_ISL_1748297, EPI_ISL_1748299                                                                                                                                                                                                                                                                                                                                                                                                                                                                                                                                                                                                                                                                                                                                                                                                                                                                                                                                                                                                                                                                                                                                                                                                                                                                                                                                                                                                                                                                                                                                                                                                                                                                                                                                                                                                                                                                                                                                                                                                                                                                                                                                                                                                                                                                                                                                                                       | Kantonsarztamt Solothurn | Clinical Bacteriology                                        | Tim Roloff, Fanny Wegner, Madlen Stange, Helena MB Seth-Smith, Alfredo Mari, Karoline Leuzinger, Julia Bielicki, Manuel Battegay, Lukas, Fenner, Hans Hirsch, Adrian Egli                                                                                                                                                                                                                                                                                             |
| EPI_ISL_1748302                                                                                                                                                                                                                                                                                                                                                                                                                                                                                                                                                                                                                                                                                                                                                                                                                                                                                                                                                                                                                                                                                                                                                                                                                                                                                                                                                                                                                                                                                                                                                                                                                                                                                                                                                                                                                                                                                                                                                                                                                                                                                                                                                                                                                                                                                                                                                                                        | Clinical Virology        | Clinical Bacteriology                                        | Tim Roloff, Madlen Stange, Helena MB Seth-Smith, Alfredo Mari, Karoline Leuzinger, Julia Bielicki, Manuel Battegay, Hans Hirsch, Adrian Egli                                                                                                                                                                                                                                                                                                                          |
| EPI_ISL_1748305                                                                                                                                                                                                                                                                                                                                                                                                                                                                                                                                                                                                                                                                                                                                                                                                                                                                                                                                                                                                                                                                                                                                                                                                                                                                                                                                                                                                                                                                                                                                                                                                                                                                                                                                                                                                                                                                                                                                                                                                                                                                                                                                                                                                                                                                                                                                                                                        | Kantonsarztamt Solothurn | Clinical Bacteriology                                        | Tim Roloff, Fanny Wegner, Madlen Stange, Helena MB Seth-Smith, Alfredo Mari, Karoline Leuzinger, Julia Bielicki, Manuel Battegay, Lukas, Fenner, Hans Hirsch, Adrian Egli                                                                                                                                                                                                                                                                                             |
| EPI_ISL_1748307, EPI_ISL_1748310                                                                                                                                                                                                                                                                                                                                                                                                                                                                                                                                                                                                                                                                                                                                                                                                                                                                                                                                                                                                                                                                                                                                                                                                                                                                                                                                                                                                                                                                                                                                                                                                                                                                                                                                                                                                                                                                                                                                                                                                                                                                                                                                                                                                                                                                                                                                                                       | Clinical Virology        | Clinical Bacteriology                                        | Tim Roloff, Madlen Stange, Helena MB Seth-Smith, Alfredo Mari, Karoline Leuzinger, Julia Bielicki, Manuel Battegay, Hans Hirsch, Adrian Egli                                                                                                                                                                                                                                                                                                                          |
| EPI_ISL_1748312                                                                                                                                                                                                                                                                                                                                                                                                                                                                                                                                                                                                                                                                                                                                                                                                                                                                                                                                                                                                                                                                                                                                                                                                                                                                                                                                                                                                                                                                                                                                                                                                                                                                                                                                                                                                                                                                                                                                                                                                                                                                                                                                                                                                                                                                                                                                                                                        | Viollier AG              | Clinical Bacteriology                                        | Tim Roloff, Madlen Stange, Helena MB Seth-Smith, Alfredo Mari, Karoline Leuzinger, Julia Bielicki, Christiane Beckmann, Manuel Battegay, Hans Hirsch, Adrian Egli                                                                                                                                                                                                                                                                                                     |
| EPI_ISL_1748314                                                                                                                                                                                                                                                                                                                                                                                                                                                                                                                                                                                                                                                                                                                                                                                                                                                                                                                                                                                                                                                                                                                                                                                                                                                                                                                                                                                                                                                                                                                                                                                                                                                                                                                                                                                                                                                                                                                                                                                                                                                                                                                                                                                                                                                                                                                                                                                        | Clinical Virology        | Clinical Bacteriology                                        | Tim Roloff, Madlen Stange, Helena MB Seth-Smith, Alfredo Mari, Karoline Leuzinger, Julia Bielicki, Manuel Battegay, Hans Hirsch, Adrian Egli                                                                                                                                                                                                                                                                                                                          |
| EPI_ISL_1748317                                                                                                                                                                                                                                                                                                                                                                                                                                                                                                                                                                                                                                                                                                                                                                                                                                                                                                                                                                                                                                                                                                                                                                                                                                                                                                                                                                                                                                                                                                                                                                                                                                                                                                                                                                                                                                                                                                                                                                                                                                                                                                                                                                                                                                                                                                                                                                                        | Viollier AG              | Clinical Bacteriology                                        | Tim Roloff, Madlen Stange, Helena MB Seth-Smith, Alfredo Mari, Karoline Leuzinger, Julia Bielicki, Christiane Beckmann, Manuel Battegay, Hans Hirsch, Adrian Egli                                                                                                                                                                                                                                                                                                     |
| EPI_ISL_1748319, EPI_ISL_1748321                                                                                                                                                                                                                                                                                                                                                                                                                                                                                                                                                                                                                                                                                                                                                                                                                                                                                                                                                                                                                                                                                                                                                                                                                                                                                                                                                                                                                                                                                                                                                                                                                                                                                                                                                                                                                                                                                                                                                                                                                                                                                                                                                                                                                                                                                                                                                                       | Clinical Virology        | Clinical Bacteriology                                        | Tim Roloff, Madlen Stange, Helena MB Seth-Smith, Alfredo Mari, Karoline Leuzinger, Julia Bielicki, Manuel Battegay, Hans Hirsch, Adrian Egli                                                                                                                                                                                                                                                                                                                          |
| EPI_ISL_1748324                                                                                                                                                                                                                                                                                                                                                                                                                                                                                                                                                                                                                                                                                                                                                                                                                                                                                                                                                                                                                                                                                                                                                                                                                                                                                                                                                                                                                                                                                                                                                                                                                                                                                                                                                                                                                                                                                                                                                                                                                                                                                                                                                                                                                                                                                                                                                                                        | Felix-Platter Spital     | Clinical Bacteriology                                        | Tim Roloff, Madlen Stange, Helena MB Seth-Smith, Alfredo Mari, Karoline Leuzinger, Julia Bielicki, Manuel Battegay, Hans Hirsch, Adrian Egli                                                                                                                                                                                                                                                                                                                          |
| EPI_ISL_1748328, EPI_ISL_1748332, EPI_ISL_1748336, EPI_ISL_1748338, EPI_ISL_1748341, EPI_ISL_1748343, EPI_ISL_1748345, EPI_ISL_1748348, EPI_ISL_1748351, EPI_ISL_1748353, EPI_ISL_1748355, EPI_ISL_1748359, EPI_ISL_1748362, EPI_ISL_1748364, EPI_ISL_1748366, EPI_ISL_1748368, EPI_ISL_1748371, EPI_ISL_1748373, EPI_ISL_1748375, EPI_ISL_1748378, EPI_ISL_1748380, EPI_ISL_1748382, EPI_ISL_1748384, EPI_ISL_1748387, EPI_ISL_1748391, EPI_ISL_1748395, EPI_ISL_1748400, EPI_ISL_1748402, EPI_ISL_1748407, EPI_ISL_1748409, EPI_ISL_1748412, EPI_ISL_1748416, EPI_ISL_1748419, EPI_ISL_1748422, EPI_ISL_1748424, EPI_ISL_1748427, EPI_ISL_1748430, EPI_ISL_1748434, EPI_ISL_1748437, EPI_ISL_1748441, EPI_ISL_1748445, EPI_ISL_1748450, EPI_ISL_1748452                                                                                                                                                                                                                                                                                                                                                                                                                                                                                                                                                                                                                                                                                                                                                                                                                                                                                                                                                                                                                                                                                                                                                                                                                                                                                                                                                                                                                                                                                                                                                                                                                                              | Clinical Virology        | Clinical Bacteriology                                        | Tim Roloff, Madlen Stange, Helena MB Seth-Smith, Alfredo Mari, Karoline Leuzinger, Julia Bielicki, Manuel Battegay, Hans Hirsch, Adrian Egli                                                                                                                                                                                                                                                                                                                          |
| see above                                                                                                                                                                                                                                                                                                                                                                                                                                                                                                                                                                                                                                                                                                                                                                                                                                                                                                                                                                                                                                                                                                                                                                                                                                                                                                                                                                                                                                                                                                                                                                                                                                                                                                                                                                                                                                                                                                                                                                                                                                                                                                                                                                                                                                                                                                                                                                                              | Clinical Virology        | Clinical Bacteriology                                        | Tim Roloff, Madlen Stange, Helena MB Seth-Smith, Alfredo Mari, Karoline Leuzinger, Julia Bielicki, Manuel Battegay, Hans Hirsch, Adrian Egli                                                                                                                                                                                                                                                                                                                          |
| EPI_ISL_1748455                                                                                                                                                                                                                                                                                                                                                                                                                                                                                                                                                                                                                                                                                                                                                                                                                                                                                                                                                                                                                                                                                                                                                                                                                                                                                                                                                                                                                                                                                                                                                                                                                                                                                                                                                                                                                                                                                                                                                                                                                                                                                                                                                                                                                                                                                                                                                                                        | Synlab Suisse S.A        | Clinical Bacteriology                                        | Tim Roloff, Madlen Stange, Helena MB Seth-Smith, Alfredo Mari, Karoline Leuzinger, Julia Bielicki, Manuel Battegay, Hans Hirsch, Adrian Egli                                                                                                                                                                                                                                                                                                                          |
| EPI_ISL_1748459                                                                                                                                                                                                                                                                                                                                                                                                                                                                                                                                                                                                                                                                                                                                                                                                                                                                                                                                                                                                                                                                                                                                                                                                                                                                                                                                                                                                                                                                                                                                                                                                                                                                                                                                                                                                                                                                                                                                                                                                                                                                                                                                                                                                                                                                                                                                                                                        | Clinical Virology        | Clinical Bacteriology                                        | Tim Roloff, Madlen Stange, Helena MB Seth-Smith, Alfredo Mari, Karoline Leuzinger, Julia Bielicki, Manuel Battegay, Hans Hirsch, Adrian Egli                                                                                                                                                                                                                                                                                                                          |
| EPI_ISL_1748468                                                                                                                                                                                                                                                                                                                                                                                                                                                                                                                                                                                                                                                                                                                                                                                                                                                                                                                                                                                                                                                                                                                                                                                                                                                                                                                                                                                                                                                                                                                                                                                                                                                                                                                                                                                                                                                                                                                                                                                                                                                                                                                                                                                                                                                                                                                                                                                        | Hetzl Patrick            | Clinical Bacteriology                                        | Tim Roloff, Madlen Stange, Helena MB Seth-Smith, Alfredo Mari, Karoline Leuzinger, Julia Bielicki, Manuel Battegay, Hans Hirsch, Adrian Egli                                                                                                                                                                                                                                                                                                                          |
| EPI_ISL_1748471, EPI_ISL_1748474, EPI_ISL_1748479, EPI_ISL_1748483, EPI_ISL_1748486, EPI_ISL_1748490, EPI_ISL_1748493, EPI_ISL_1748495, EPI_ISL_1748497, EPI_ISL_1748502, EPI_ISL_1748504                                                                                                                                                                                                                                                                                                                                                                                                                                                                                                                                                                                                                                                                                                                                                                                                                                                                                                                                                                                                                                                                                                                                                                                                                                                                                                                                                                                                                                                                                                                                                                                                                                                                                                                                                                                                                                                                                                                                                                                                                                                                                                                                                                                                              | Clinical Virology        | Clinical Bacteriology                                        | Tim Roloff, Madlen Stange, Helena MB Seth-Smith, Alfredo Mari, Karoline Leuzinger, Julia Bielicki, Manuel Battegay, Hans Hirsch, Adrian Egli                                                                                                                                                                                                                                                                                                                          |
| see above                                                                                                                                                                                                                                                                                                                                                                                                                                                                                                                                                                                                                                                                                                                                                                                                                                                                                                                                                                                                                                                                                                                                                                                                                                                                                                                                                                                                                                                                                                                                                                                                                                                                                                                                                                                                                                                                                                                                                                                                                                                                                                                                                                                                                                                                                                                                                                                              | Clinical Virology        | Clinical Bacteriology                                        | Tim Roloff, Madlen Stange, Helena MB Seth-Smith, Alfredo Mari, Karoline Leuzinger, Julia Bielicki, Manuel Battegay, Hans Hirsch, Adrian Egli                                                                                                                                                                                                                                                                                                                          |
| EPI_ISL_1748507                                                                                                                                                                                                                                                                                                                                                                                                                                                                                                                                                                                                                                                                                                                                                                                                                                                                                                                                                                                                                                                                                                                                                                                                                                                                                                                                                                                                                                                                                                                                                                                                                                                                                                                                                                                                                                                                                                                                                                                                                                                                                                                                                                                                                                                                                                                                                                                        | Kantonsarztamt Solothurn | Clinical Bacteriology                                        | Tim Roloff, Fanny Wegner, Madlen Stange, Helena MB Seth-Smith, Alfredo Mari, Karoline Leuzinger, Julia Bielicki, Manuel Battegay, Lukas, Fenner, Hans Hirsch, Adrian Egli                                                                                                                                                                                                                                                                                             |
| EPI_ISL_1748509, EPI_ISL_1748513, EPI_ISL_1748516, EPI_ISL_1748518, EPI_ISL_1748522, EPI_ISL_1748527, EPI_ISL_1748531, EPI_ISL_1748534, EPI_ISL_1748537, EPI_ISL_1748539, EPI_ISL_1748541, EPI_ISL_1748543                                                                                                                                                                                                                                                                                                                                                                                                                                                                                                                                                                                                                                                                                                                                                                                                                                                                                                                                                                                                                                                                                                                                                                                                                                                                                                                                                                                                                                                                                                                                                                                                                                                                                                                                                                                                                                                                                                                                                                                                                                                                                                                                                                                             | Clinical Virology        | Clinical Bacteriology                                        | Tim Roloff, Madlen Stange, Helena MB Seth-Smith, Alfredo Mari, Karoline Leuzinger, Julia Bielicki, Manuel Battegay, Hans Hirsch, Adrian Egli                                                                                                                                                                                                                                                                                                                          |
| see above                                                                                                                                                                                                                                                                                                                                                                                                                                                                                                                                                                                                                                                                                                                                                                                                                                                                                                                                                                                                                                                                                                                                                                                                                                                                                                                                                                                                                                                                                                                                                                                                                                                                                                                                                                                                                                                                                                                                                                                                                                                                                                                                                                                                                                                                                                                                                                                              | Clinical Virology        | Clinical Bacteriology                                        | Tim Roloff, Madlen Stange, Helena MB Seth-Smith, Alfredo Mari, Karoline Leuzinger, Julia Bielicki, Manuel Battegay, Hans Hirsch, Adrian Egli                                                                                                                                                                                                                                                                                                                          |
| EPI_ISL_1748546                                                                                                                                                                                                                                                                                                                                                                                                                                                                                                                                                                                                                                                                                                                                                                                                                                                                                                                                                                                                                                                                                                                                                                                                                                                                                                                                                                                                                                                                                                                                                                                                                                                                                                                                                                                                                                                                                                                                                                                                                                                                                                                                                                                                                                                                                                                                                                                        | Kantonsarztamt Solothurn | Clinical Bacteriology                                        | Tim Roloff, Fanny Wegner, Madlen Stange, Helena MB Seth-Smith, Alfredo Mari, Karoline Leuzinger, Julia Bielicki, Manuel Battegay, Lukas, Fenner, Hans Hirsch, Adrian Egli                                                                                                                                                                                                                                                                                             |
| EPI_ISL_1748550, EPI_ISL_1748554                                                                                                                                                                                                                                                                                                                                                                                                                                                                                                                                                                                                                                                                                                                                                                                                                                                                                                                                                                                                                                                                                                                                                                                                                                                                                                                                                                                                                                                                                                                                                                                                                                                                                                                                                                                                                                                                                                                                                                                                                                                                                                                                                                                                                                                                                                                                                                       | Clinical Virology        | Clinical Bacteriology                                        | Tim Roloff, Madlen Stange, Helena MB Seth-Smith, Alfredo Mari, Karoline Leuzinger, Julia Bielicki, Manuel Battegay, Hans Hirsch, Adrian Egli                                                                                                                                                                                                                                                                                                                          |
| EPI_ISL_1748559                                                                                                                                                                                                                                                                                                                                                                                                                                                                                                                                                                                                                                                                                                                                                                                                                                                                                                                                                                                                                                                                                                                                                                                                                                                                                                                                                                                                                                                                                                                                                                                                                                                                                                                                                                                                                                                                                                                                                                                                                                                                                                                                                                                                                                                                                                                                                                                        | Kantonsarztamt Solothurn | Clinical Bacteriology                                        | Tim Roloff, Fanny Wegner, Madlen Stange, Helena MB Seth-Smith, Alfredo Mari, Karoline Leuzinger, Julia Bielicki, Manuel Battegay, Lukas, Fenner, Hans Hirsch, Adrian Egli                                                                                                                                                                                                                                                                                             |
| EPI_ISL_1748563, EPI_ISL_1748568, EPI_ISL_1748570, EPI_ISL_1748580, EPI_ISL_1748585, EPI_ISL_1748587, EPI_ISL_1748592, EPI_ISL_1748596, EPI_ISL_1748600, EPI_ISL_1748604, EPI_ISL_1748609, EPI_ISL_1748614, EPI_ISL_1748618, EPI_ISL_1748622                                                                                                                                                                                                                                                                                                                                                                                                                                                                                                                                                                                                                                                                                                                                                                                                                                                                                                                                                                                                                                                                                                                                                                                                                                                                                                                                                                                                                                                                                                                                                                                                                                                                                                                                                                                                                                                                                                                                                                                                                                                                                                                                                           | Clinical Virology        | Clinical Bacteriology                                        | Tim Roloff, Madlen Stange, Helena MB Seth-Smith, Alfredo Mari, Karoline Leuzinger, Julia Bielicki, Manuel Battegay, Hans Hirsch, Adrian Egli                                                                                                                                                                                                                                                                                                                          |
| see above                                                                                                                                                                                                                                                                                                                                                                                                                                                                                                                                                                                                                                                                                                                                                                                                                                                                                                                                                                                                                                                                                                                                                                                                                                                                                                                                                                                                                                                                                                                                                                                                                                                                                                                                                                                                                                                                                                                                                                                                                                                                                                                                                                                                                                                                                                                                                                                              | Clinical Virology        | Clinical Bacteriology                                        | Tim Roloff, Madlen Stange, Helena MB Seth-Smith, Alfredo Mari, Karoline Leuzinger, Julia Bielicki, Manuel Battegay, Hans Hirsch, Adrian Egli                                                                                                                                                                                                                                                                                                                          |
| EPI_ISL_1748626                                                                                                                                                                                                                                                                                                                                                                                                                                                                                                                                                                                                                                                                                                                                                                                                                                                                                                                                                                                                                                                                                                                                                                                                                                                                                                                                                                                                                                                                                                                                                                                                                                                                                                                                                                                                                                                                                                                                                                                                                                                                                                                                                                                                                                                                                                                                                                                        | Kantonsarztamt Solothurn | Clinical Bacteriology                                        | Tim Roloff, Fanny Wegner, Madlen Stange, Helena MB Seth-Smith, Alfredo Mari, Karoline Leuzinger, Julia Bielicki, Manuel Battegay, Lukas, Fenner, Hans Hirsch, Adrian Egli                                                                                                                                                                                                                                                                                             |
| EPI_ISL_1748631, EPI_ISL_1748634, EPI_ISL_1748638, EPI_ISL_1748640, EPI_ISL_1748642, EPI_ISL_1748644, EPI_ISL_1748647, EPI_ISL_1748649, EPI_ISL_1748653, EPI_ISL_1748655, EPI_ISL_1748660                                                                                                                                                                                                                                                                                                                                                                                                                                                                                                                                                                                                                                                                                                                                                                                                                                                                                                                                                                                                                                                                                                                                                                                                                                                                                                                                                                                                                                                                                                                                                                                                                                                                                                                                                                                                                                                                                                                                                                                                                                                                                                                                                                                                              | Clinical Virology        | Clinical Bacteriology                                        | Tim Roloff, Madlen Stange, Helena MB Seth-Smith, Alfredo Mari, Karoline Leuzinger, Julia Bielicki, Manuel Battegay, Hans Hirsch, Adrian Egli                                                                                                                                                                                                                                                                                                                          |
| see above                                                                                                                                                                                                                                                                                                                                                                                                                                                                                                                                                                                                                                                                                                                                                                                                                                                                                                                                                                                                                                                                                                                                                                                                                                                                                                                                                                                                                                                                                                                                                                                                                                                                                                                                                                                                                                                                                                                                                                                                                                                                                                                                                                                                                                                                                                                                                                                              | Clinical Virology        | Clinical Bacteriology                                        | Tim Roloff, Madlen Stange, Helena MB Seth-Smith, Alfredo Mari, Karoline Leuzinger, Julia Bielicki, Manuel Battegay, Hans Hirsch, Adrian Egli                                                                                                                                                                                                                                                                                                                          |
| EPI_ISL_1748664                                                                                                                                                                                                                                                                                                                                                                                                                                                                                                                                                                                                                                                                                                                                                                                                                                                                                                                                                                                                                                                                                                                                                                                                                                                                                                                                                                                                                                                                                                                                                                                                                                                                                                                                                                                                                                                                                                                                                                                                                                                                                                                                                                                                                                                                                                                                                                                        | Kantonsarztamt Solothurn | Clinical Bacteriology                                        | Tim Roloff, Fanny Wegner, Madlen Stange, Helena MB Seth-Smith, Alfredo Mari, Karoline Leuzinger, Julia Bielicki, Manuel Battegay, Lukas, Fenner, Hans Hirsch, Adrian Egli                                                                                                                                                                                                                                                                                             |
| EPI_ISL_1748668, EPI_ISL_1748673, EPI_ISL_1748677, EPI_ISL_1748681, EPI_ISL_1748685, EPI_ISL_1748689, EPI_ISL_1748694, EPI_ISL_1748698, EPI_ISL_1748703, EPI_ISL_1748706, EPI_ISL_1748708, EPI_ISL_1748711, EPI_ISL_1748714                                                                                                                                                                                                                                                                                                                                                                                                                                                                                                                                                                                                                                                                                                                                                                                                                                                                                                                                                                                                                                                                                                                                                                                                                                                                                                                                                                                                                                                                                                                                                                                                                                                                                                                                                                                                                                                                                                                                                                                                                                                                                                                                                                            | Clinical Virology        | Clinical Bacteriology                                        | Tim Roloff, Madlen Stange, Helena MB Seth-Smith, Alfredo Mari, Karoline Leuzinger, Julia Bielicki, Manuel Battegay, Hans Hirsch, Adrian Egli                                                                                                                                                                                                                                                                                                                          |
| see above                                                                                                                                                                                                                                                                                                                                                                                                                                                                                                                                                                                                                                                                                                                                                                                                                                                                                                                                                                                                                                                                                                                                                                                                                                                                                                                                                                                                                                                                                                                                                                                                                                                                                                                                                                                                                                                                                                                                                                                                                                                                                                                                                                                                                                                                                                                                                                                              | Clinical Virology        | Clinical Bacteriology                                        | Tim Roloff, Madlen Stange, Helena MB Seth-Smith, Alfredo Mari, Karoline Leuzinger, Julia Bielicki, Manuel Battegay, Hans Hirsch, Adrian Egli                                                                                                                                                                                                                                                                                                                          |
| EPI_ISL_1748719                                                                                                                                                                                                                                                                                                                                                                                                                                                                                                                                                                                                                                                                                                                                                                                                                                                                                                                                                                                                                                                                                                                                                                                                                                                                                                                                                                                                                                                                                                                                                                                                                                                                                                                                                                                                                                                                                                                                                                                                                                                                                                                                                                                                                                                                                                                                                                                        | Kantonsarztamt Solothurn | Clinical Bacteriology                                        | Tim Roloff, Fanny Wegner, Madlen Stange, Helena MB Seth-Smith, Alfredo Mari, Karoline Leuzinger, Julia Bielicki, Manuel Battegay, Lukas, Fenner, Hans Hirsch, Adrian Egli                                                                                                                                                                                                                                                                                             |
| EPI_ISL_1748723, EPI_ISL_1748725, EPI_ISL_1748730, EPI_ISL_1748732, EPI_ISL_1748734                                                                                                                                                                                                                                                                                                                                                                                                                                                                                                                                                                                                                                                                                                                                                                                                                                                                                                                                                                                                                                                                                                                                                                                                                                                                                                                                                                                                                                                                                                                                                                                                                                                                                                                                                                                                                                                                                                                                                                                                                                                                                                                                                                                                                                                                                                                    | Clinical Virology        | Clinical Bacteriology                                        | Tim Roloff, Madlen Stange, Helena MB Seth-Smith, Alfredo Mari, Karoline Leuzinger, Julia Bielicki, Manuel Battegay, Hans Hirsch, Adrian Egli                                                                                                                                                                                                                                                                                                                          |
| EPI_ISL_1760823, EPI_ISL_1760827, EPI_ISL_1760829, EPI_ISL_1760830, EPI_ISL_1760833, EPI_ISL_1760834, EPI_ISL_1760835, EPI_ISL_1760836, EPI_ISL_1760839, EPI_ISL_1760842, EPI_ISL_1760843, EPI_ISL_1760847, EPI_ISL_1760848, EPI_ISL_1760849, EPI_ISL_1760850, EPI_ISL_1760851, EPI_ISL_1760857, EPI_ISL_1760863, EPI_ISL_1760864, EPI_ISL_1760869, EPI_ISL_1760870, EPI_ISL_1760872, EPI_ISL_1760874, EPI_ISL_1760875, EPI_ISL_1760876, EPI_ISL_1760877, EPI_ISL_1760878, EPI_ISL_1760879, EPI_ISL_1760880, EPI_ISL_1760884, EPI_ISL_1760889, EPI_ISL_1760890, EPI_ISL_1760892, EPI_ISL_1760893, EPI_ISL_1760895, EPI_ISL_1760896, EPI_ISL_1760897, EPI_ISL_1760899, EPI_ISL_1760900, EPI_ISL_1760901, EPI_ISL_1760902, EPI_ISL_1760904, EPI_ISL_1760905, EPI_ISL_1760906, EPI_ISL_1760907, EPI_ISL_1760908, EPI_ISL_1760909, EPI_ISL_1760910, EPI_ISL_1760911, EPI_ISL_1760912, EPI_ISL_1760913, EPI_ISL_1760914, EPI_ISL_1760919, EPI_ISL_1760922, EPI_ISL_1760944, EPI_ISL_1760945, EPI_ISL_1760949, EPI_ISL_1760950, EPI_ISL_1760951, EPI_ISL_1760954, EPI_ISL_1760958, EPI_ISL_1760962, EPI_ISL_1760970, EPI_ISL_1760972, EPI_ISL_1760977, EPI_ISL_1760998, EPI_ISL_1760999, EPI_ISL_1761002, EPI_ISL_1761005, EPI_ISL_1761006, EPI_ISL_1761007, EPI_ISL_1761008, EPI_ISL_1761010, EPI_ISL_1761011, EPI_ISL_1761012, EPI_ISL_1761014, EPI_ISL_1761016, EPI_ISL_1761019, EPI_ISL_1761021, EPI_ISL_1761023, EPI_ISL_1761024, EPI_ISL_1761025, EPI_ISL_1761026, EPI_ISL_1761027, EPI_ISL_1761028, EPI_ISL_1761029, EPI_ISL_1761030, EPI_ISL_1761031, EPI_ISL_1761032, EPI_ISL_1761033, EPI_ISL_1761034, EPI_ISL_1761035, EPI_ISL_1761036, EPI_ISL_1761038, EPI_ISL_1761039, EPI_ISL_1761040, EPI_ISL_1761041, EPI_ISL_1761042, EPI_ISL_1761043, EPI_ISL_1761044, EPI_ISL_1761045, EPI_ISL_1761047, EPI_ISL_1761048, EPI_ISL_1761069, EPI_ISL_1761070, EPI_ISL_1761071, EPI_ISL_1761072, EPI_ISL_1761076, EPI_ISL_1761083, EPI_ISL_1761088, EPI_ISL_1761095, EPI_ISL_1761096, EPI_ISL_1761097, EPI_ISL_1761100, EPI_ISL_1761101, EPI_ISL_1761102, EPI_ISL_1761104, EPI_ISL_1761108, EPI_ISL_1761111, EPI_ISL_1761114, EPI_ISL_1761116, EPI_ISL_1761117, EPI_ISL_1761118, EPI_ISL_1761119, EPI_ISL_1761120, EPI_ISL_1761122, EPI_ISL_1761123, EPI_ISL_1761124, EPI_ISL_1761125, EPI_ISL_1761126, EPI_ISL_1761127, EPI_ISL_1761128, EPI_ISL_1761129, EPI_ISL_1761130, EPI_ISL_1761131, EPI_ISL_1761132 | Clinical Virology        | Clinical Bacteriology                                        | Tim Roloff, Madlen Stange, Helena MB Seth-Smith, Alfredo Mari, Karoline Leuzinger, Julia Bielicki, Manuel Battegay, Hans Hirsch, Adrian Egli                                                                                                                                                                                                                                                                                                                          |
| see above                                                                                                                                                                                                                                                                                                                                                                                                                                                                                                                                                                                                                                                                                                                                                                                                                                                                                                                                                                                                                                                                                                                                                                                                                                                                                                                                                                                                                                                                                                                                                                                                                                                                                                                                                                                                                                                                                                                                                                                                                                                                                                                                                                                                                                                                                                                                                                                              | Viollier AG              | Department of Biosystems Science and Engineering, ETH Zürich | Chaoran Chen, Sarah Nadeau, Catharine Aquino, Ivan Topolsky, Philipp Jablonski, Lara Fuhrmann, David Dreifuss, Katharina Jahn, Andrea Cabral de Gouvea, Maria Domenica Moccia, Simon Grüter, Timothy Sykes, Lennart Opitz, Griffin Wykes, Laura Neff, Doris Popovic, Andrea Patrigiani, Jay Tracy, Ralph Schlapbach, Christiane Beckmann, Maurice Redondo, Olivier Kobel, Christoph Noppen, Sophie Seidel, Noemie Santamaria de Souza, Niko Beerwinkel, Tanja Stadler |
| EPI_ISL_1791067                                                                                                                                                                                                                                                                                                                                                                                                                                                                                                                                                                                                                                                                                                                                                                                                                                                                                                                                                                                                                                                                                                                                                                                                                                                                                                                                                                                                                                                                                                                                                                                                                                                                                                                                                                                                                                                                                                                                                                                                                                                                                                                                                                                                                                                                                                                                                                                        | Limmattal Hospital       | Institute of Medical Virology, University of Zurich          | Verena Kufner, Gabriela Ziltener, Maryam Zaheri, Stefan Schmutz, Annette Audigé, Maria Grünberg, Kevin Steiner, Jon Huder, Cyril Shah, Riccarda                                                                                                                                                                                                                                                                                                                       |

|                                                                                                                                                                                                                                                                                                                                                                                                                           |                                  |                                         |                                                                                                                                                                                                                     |
|---------------------------------------------------------------------------------------------------------------------------------------------------------------------------------------------------------------------------------------------------------------------------------------------------------------------------------------------------------------------------------------------------------------------------|----------------------------------|-----------------------------------------|---------------------------------------------------------------------------------------------------------------------------------------------------------------------------------------------------------------------|
| EPI_ISL_1821722, EPI_ISL_1821751                                                                                                                                                                                                                                                                                                                                                                                          | Viollier AG                      | Viollier AG                             | Capaul, Guido Bloemberg, Jürg Böni, Michael Huber, Alexandra Trkola                                                                                                                                                 |
| EPI_ISL_1829041, EPI_ISL_1829042,<br>EPI_ISL_1829043, EPI_ISL_1829044,<br>EPI_ISL_1829109, EPI_ISL_1829188                                                                                                                                                                                                                                                                                                                | CHUV                             | Laboratory of genomics and metagenomics | Andrea Patrizia Salzmann, Henriette Kurth, Christiane Beckmann, Maurice Redondo, Olivier Kobel, Christoph Noppen<br>Trestan Pillonel, Damien Jacot, Sébastien Aeby, Gilbert Greub, Claire Bertelli                  |
| EPI_ISL_1829199                                                                                                                                                                                                                                                                                                                                                                                                           | EHNV                             | Laboratory of genomics and metagenomics | Trestan Pillonel, Damien Jacot, Sébastien Aeby, Gilbert Greub, Claire Bertelli                                                                                                                                      |
| EPI_ISL_1939226, EPI_ISL_1939227                                                                                                                                                                                                                                                                                                                                                                                          | Universitäts-Kinderspital Zürich | Institute of Medical Virology           | Verena Kufner, Gabriela Ziltener, Maryam Zaheri, Stefan Schmutz, Annette Audigé, Maria Grünberg, Kevin Steiner, Jon Huder, Cyril Shah, Riccarda Capaul, Guido Bloemberg, Jürg Böni, Michael Huber, Alexandra Trkola |
| EPI_ISL_2020333                                                                                                                                                                                                                                                                                                                                                                                                           | Laborgemeinschaft 1              | Institute of Medical Virology           | Verena Kufner, Gabriela Ziltener, Maryam Zaheri, Stefan Schmutz, Annette Audigé, Maria Grünberg, Kevin Steiner, Jon Huder, Cyril Shah, Riccarda Capaul, Guido Bloemberg, Jürg Böni, Michael Huber, Alexandra Trkola |
| EPI_ISL_2102071, EPI_ISL_2102072, EPI_ISL_2102073, EPI_ISL_2102074, EPI_ISL_2102075, EPI_ISL_2102076, EPI_ISL_2102077, EPI_ISL_2102078, EPI_ISL_2102079, EPI_ISL_2102080, EPI_ISL_2102081, EPI_ISL_2102082, EPI_ISL_2102083, EPI_ISL_2102084, EPI_ISL_2102085, EPI_ISL_2102086, EPI_ISL_2102087,<br>EPI_ISL_2102088, EPI_ISL_2102089, EPI_ISL_2102090, EPI_ISL_2102115, EPI_ISL_2102116, EPI_ISL_2102117, EPI_ISL_2102118 | see above                        | Clinical Bacteriology                   | Tim Roloff, Madlen Stange, Helena MB Seth-Smith, Alfredo Mari, Karoline Leuzinger, Julia Bielicki, Manuel Battegay, Hans Hirsch, Adrian Egli                                                                        |























|                                                                                                                                                                                                                                                                                                                                                                                                                                                                                                                                                                                                                                                                                                                                                                                                                               |                              |                                                              |                                                                                                                                                                                                                                                                                                                                                                                                                                                                         |
|-------------------------------------------------------------------------------------------------------------------------------------------------------------------------------------------------------------------------------------------------------------------------------------------------------------------------------------------------------------------------------------------------------------------------------------------------------------------------------------------------------------------------------------------------------------------------------------------------------------------------------------------------------------------------------------------------------------------------------------------------------------------------------------------------------------------------------|------------------------------|--------------------------------------------------------------|-------------------------------------------------------------------------------------------------------------------------------------------------------------------------------------------------------------------------------------------------------------------------------------------------------------------------------------------------------------------------------------------------------------------------------------------------------------------------|
|                                                                                                                                                                                                                                                                                                                                                                                                                                                                                                                                                                                                                                                                                                                                                                                                                               | Zurich                       |                                                              | Philipp Jablonski, Lara Fuhrmann, David Dreifuss, Katharina Jahn, Christiane Beckmann, Maurice Redondo, Olivier Kobel, Christoph Noppen, Sophie Seidel, Noemie Santamaria de Souza, Niko Beerenwinkel, Tanja Stadler                                                                                                                                                                                                                                                    |
| EPI_ISL_1659097, EPI_ISL_1659099, EPI_ISL_1659100, EPI_ISL_1659101, EPI_ISL_1659103, EPI_ISL_1659104, EPI_ISL_1659108, EPI_ISL_1659109, EPI_ISL_1659111, EPI_ISL_1659112, EPI_ISL_1659113, EPI_ISL_1659122, EPI_ISL_1659123, EPI_ISL_1659124, EPI_ISL_1659126, EPI_ISL_1659132, EPI_ISL_1659136, EPI_ISL_1659138, EPI_ISL_1659144, EPI_ISL_1659148                                                                                                                                                                                                                                                                                                                                                                                                                                                                            |                              |                                                              |                                                                                                                                                                                                                                                                                                                                                                                                                                                                         |
| see above                                                                                                                                                                                                                                                                                                                                                                                                                                                                                                                                                                                                                                                                                                                                                                                                                     | Viollier AG                  | Department of Biosystems Science and Engineering, ETH Zurich | Chaoran Chen, Sarah Nadeau, Catharine Aquino, Ivan Topolsky, Philipp Jablonski, Lara Fuhrmann, David Dreifuss, Katharina Jahn, Andrea Cabral de Gouvea, Maria Domenica Moccia, Simon Gruter, Timothy Sykes, Lennart Opitz, Griffin White, Laura Neff, Doris Popovic, Andrea Patrignani, Jay Tracy, Ralph Schlapbach, Christiane Beckmann, Maurice Redondo, Olivier Kobel, Christoph Noppen, Sophie Seidel, Noemie Santamaria de Souza, Niko Beerenwinkel, Tanja Stadler |
| EPI_ISL_1659149, EPI_ISL_1659150                                                                                                                                                                                                                                                                                                                                                                                                                                                                                                                                                                                                                                                                                                                                                                                              | Viollier AG                  | Department of Biosystems Science and Engineering, ETH Zurich | Chaoran Chen, Sarah Nadeau, Ivan Topolsky, Emmanouil Dermizakis, Keith Harshman, Ioannis Xenarios, Henri Pegeot, Lorenzo Cerutti, Deborah Penet, Philipp Jablonski, Lara Fuhrmann, David Dreifuss, Katharina Jahn, Christiane Beckmann, Maurice Redondo, Olivier Kobel, Christoph Noppen, Sophie Seidel, Noemie Santamaria de Souza, Niko Beerenwinkel, Tanja Stadler                                                                                                   |
| EPI_ISL_1659151, EPI_ISL_1659156, EPI_ISL_1659159, EPI_ISL_1659161, EPI_ISL_1659162                                                                                                                                                                                                                                                                                                                                                                                                                                                                                                                                                                                                                                                                                                                                           | Viollier AG                  | Department of Biosystems Science and Engineering, ETH Zurich | Chaoran Chen, Sarah Nadeau, Catharine Aquino, Ivan Topolsky, Philipp Jablonski, Lara Fuhrmann, David Dreifuss, Katharina Jahn, Andrea Cabral de Gouvea, Maria Domenica Moccia, Simon Gruter, Timothy Sykes, Lennart Opitz, Griffin White, Laura Neff, Doris Popovic, Andrea Patrignani, Jay Tracy, Ralph Schlapbach, Christiane Beckmann, Maurice Redondo, Olivier Kobel, Christoph Noppen, Sophie Seidel, Noemie Santamaria de Souza, Niko Beerenwinkel, Tanja Stadler |
| EPI_ISL_1659165                                                                                                                                                                                                                                                                                                                                                                                                                                                                                                                                                                                                                                                                                                                                                                                                               | Viollier AG                  | Department of Biosystems Science and Engineering, ETH Zurich | Chaoran Chen, Sarah Nadeau, Ivan Topolsky, Emmanouil Dermizakis, Keith Harshman, Ioannis Xenarios, Henri Pegeot, Lorenzo Cerutti, Deborah Penet, Philipp Jablonski, Lara Fuhrmann, David Dreifuss, Katharina Jahn, Christiane Beckmann, Maurice Redondo, Olivier Kobel, Christoph Noppen, Sophie Seidel, Noemie Santamaria de Souza, Niko Beerenwinkel, Tanja Stadler                                                                                                   |
| EPI_ISL_1659173, EPI_ISL_1659183                                                                                                                                                                                                                                                                                                                                                                                                                                                                                                                                                                                                                                                                                                                                                                                              | Viollier AG                  | Department of Biosystems Science and Engineering, ETH Zurich | Chaoran Chen, Sarah Nadeau, Catharine Aquino, Ivan Topolsky, Philipp Jablonski, Lara Fuhrmann, David Dreifuss, Katharina Jahn, Andrea Cabral de Gouvea, Maria Domenica Moccia, Simon Gruter, Timothy Sykes, Lennart Opitz, Griffin White, Laura Neff, Doris Popovic, Andrea Patrignani, Jay Tracy, Ralph Schlapbach, Christiane Beckmann, Maurice Redondo, Olivier Kobel, Christoph Noppen, Sophie Seidel, Noemie Santamaria de Souza, Niko Beerenwinkel, Tanja Stadler |
| EPI_ISL_1659184, EPI_ISL_1659185, EPI_ISL_1659186, EPI_ISL_1659187, EPI_ISL_1659190, EPI_ISL_1659194                                                                                                                                                                                                                                                                                                                                                                                                                                                                                                                                                                                                                                                                                                                          | Viollier AG                  | Department of Biosystems Science and Engineering, ETH Zurich | Chaoran Chen, Sarah Nadeau, Ivan Topolsky, Emmanouil Dermizakis, Keith Harshman, Ioannis Xenarios, Henri Pegeot, Lorenzo Cerutti, Deborah Penet, Philipp Jablonski, Lara Fuhrmann, David Dreifuss, Katharina Jahn, Christiane Beckmann, Maurice Redondo, Olivier Kobel, Christoph Noppen, Sophie Seidel, Noemie Santamaria de Souza, Niko Beerenwinkel, Tanja Stadler                                                                                                   |
| EPI_ISL_1659195, EPI_ISL_1659196, EPI_ISL_1659197, EPI_ISL_1659199                                                                                                                                                                                                                                                                                                                                                                                                                                                                                                                                                                                                                                                                                                                                                            | Viollier AG                  | Department of Biosystems Science and Engineering, ETH Zurich | Chaoran Chen, Sarah Nadeau, Catharine Aquino, Ivan Topolsky, Philipp Jablonski, Lara Fuhrmann, David Dreifuss, Katharina Jahn, Andrea Cabral de Gouvea, Maria Domenica Moccia, Simon Gruter, Timothy Sykes, Lennart Opitz, Griffin White, Laura Neff, Doris Popovic, Andrea Patrignani, Jay Tracy, Ralph Schlapbach, Christiane Beckmann, Maurice Redondo, Olivier Kobel, Christoph Noppen, Sophie Seidel, Noemie Santamaria de Souza, Niko Beerenwinkel, Tanja Stadler |
| EPI_ISL_1659200                                                                                                                                                                                                                                                                                                                                                                                                                                                                                                                                                                                                                                                                                                                                                                                                               | Viollier AG                  | Department of Biosystems Science and Engineering, ETH Zurich | Chaoran Chen, Sarah Nadeau, Ivan Topolsky, Emmanouil Dermizakis, Keith Harshman, Ioannis Xenarios, Henri Pegeot, Lorenzo Cerutti, Deborah Penet, Philipp Jablonski, Lara Fuhrmann, David Dreifuss, Katharina Jahn, Christiane Beckmann, Maurice Redondo, Olivier Kobel, Christoph Noppen, Sophie Seidel, Noemie Santamaria de Souza, Niko Beerenwinkel, Tanja Stadler                                                                                                   |
| EPI_ISL_1659203, EPI_ISL_1659207, EPI_ISL_1659208                                                                                                                                                                                                                                                                                                                                                                                                                                                                                                                                                                                                                                                                                                                                                                             | Viollier AG                  | Department of Biosystems Science and Engineering, ETH Zurich | Chaoran Chen, Sarah Nadeau, Catharine Aquino, Ivan Topolsky, Philipp Jablonski, Lara Fuhrmann, David Dreifuss, Katharina Jahn, Andrea Cabral de Gouvea, Maria Domenica Moccia, Simon Gruter, Timothy Sykes, Lennart Opitz, Griffin White, Laura Neff, Doris Popovic, Andrea Patrignani, Jay Tracy, Ralph Schlapbach, Christiane Beckmann, Maurice Redondo, Olivier Kobel, Christoph Noppen, Sophie Seidel, Noemie Santamaria de Souza, Niko Beerenwinkel, Tanja Stadler |
| EPI_ISL_1659209                                                                                                                                                                                                                                                                                                                                                                                                                                                                                                                                                                                                                                                                                                                                                                                                               | Viollier AG                  | Department of Biosystems Science and Engineering, ETH Zurich | Chaoran Chen, Sarah Nadeau, Ivan Topolsky, Emmanouil Dermizakis, Keith Harshman, Ioannis Xenarios, Henri Pegeot, Lorenzo Cerutti, Deborah Penet, Philipp Jablonski, Lara Fuhrmann, David Dreifuss, Katharina Jahn, Christiane Beckmann, Maurice Redondo, Olivier Kobel, Christoph Noppen, Sophie Seidel, Noemie Santamaria de Souza, Niko Beerenwinkel, Tanja Stadler                                                                                                   |
| EPI_ISL_1659210, EPI_ISL_1659211, EPI_ISL_1659212, EPI_ISL_1659213                                                                                                                                                                                                                                                                                                                                                                                                                                                                                                                                                                                                                                                                                                                                                            | Viollier AG                  | Department of Biosystems Science and Engineering, ETH Zurich | Chaoran Chen, Sarah Nadeau, Catharine Aquino, Ivan Topolsky, Philipp Jablonski, Lara Fuhrmann, David Dreifuss, Katharina Jahn, Andrea Cabral de Gouvea, Maria Domenica Moccia, Simon Gruter, Timothy Sykes, Lennart Opitz, Griffin White, Laura Neff, Doris Popovic, Andrea Patrignani, Jay Tracy, Ralph Schlapbach, Christiane Beckmann, Maurice Redondo, Olivier Kobel, Christoph Noppen, Sophie Seidel, Noemie Santamaria de Souza, Niko Beerenwinkel, Tanja Stadler |
| EPI_ISL_1659214, EPI_ISL_1659215, EPI_ISL_1659217                                                                                                                                                                                                                                                                                                                                                                                                                                                                                                                                                                                                                                                                                                                                                                             | Viollier AG                  | Department of Biosystems Science and Engineering, ETH Zurich | Chaoran Chen, Sarah Nadeau, Ivan Topolsky, Emmanouil Dermizakis, Keith Harshman, Ioannis Xenarios, Henri Pegeot, Lorenzo Cerutti, Deborah Penet, Philipp Jablonski, Lara Fuhrmann, David Dreifuss, Katharina Jahn, Christiane Beckmann, Maurice Redondo, Olivier Kobel, Christoph Noppen, Sophie Seidel, Noemie Santamaria de Souza, Niko Beerenwinkel, Tanja Stadler                                                                                                   |
| EPI_ISL_1659219, EPI_ISL_1659220, EPI_ISL_1659284                                                                                                                                                                                                                                                                                                                                                                                                                                                                                                                                                                                                                                                                                                                                                                             | Viollier AG                  | Department of Biosystems Science and Engineering, ETH Zurich | Chaoran Chen, Sarah Nadeau, Catharine Aquino, Ivan Topolsky, Philipp Jablonski, Lara Fuhrmann, David Dreifuss, Katharina Jahn, Andrea Cabral de Gouvea, Maria Domenica Moccia, Simon Gruter, Timothy Sykes, Lennart Opitz, Griffin White, Laura Neff, Doris Popovic, Andrea Patrignani, Jay Tracy, Ralph Schlapbach, Christiane Beckmann, Maurice Redondo, Olivier Kobel, Christoph Noppen, Sophie Seidel, Noemie Santamaria de Souza, Niko Beerenwinkel, Tanja Stadler |
| EPI_ISL_1659341                                                                                                                                                                                                                                                                                                                                                                                                                                                                                                                                                                                                                                                                                                                                                                                                               | Viollier AG                  | Department of Biosystems Science and Engineering, ETH Zurich | Chaoran Chen, Sarah Nadeau, Ivan Topolsky, Emmanouil Dermizakis, Keith Harshman, Ioannis Xenarios, Henri Pegeot, Lorenzo Cerutti, Deborah Penet, Philipp Jablonski, Lara Fuhrmann, David Dreifuss, Katharina Jahn, Christiane Beckmann, Maurice Redondo, Olivier Kobel, Christoph Noppen, Sophie Seidel, Noemie Santamaria de Souza, Niko Beerenwinkel, Tanja Stadler                                                                                                   |
| EPI_ISL_1662530, EPI_ISL_1662531, EPI_ISL_1662532, EPI_ISL_1662533, EPI_ISL_1662534, EPI_ISL_1662535, EPI_ISL_1662536, EPI_ISL_1662537, EPI_ISL_1662538, EPI_ISL_1662539, EPI_ISL_1662540, EPI_ISL_1662541, EPI_ISL_1662542, EPI_ISL_1662543, EPI_ISL_1662544, EPI_ISL_1662545, EPI_ISL_1662546, EPI_ISL_1662547, EPI_ISL_1662548, EPI_ISL_1662549, EPI_ISL_1662550, EPI_ISL_1662551, EPI_ISL_1662552, EPI_ISL_1662553, EPI_ISL_1662554, EPI_ISL_1662555, EPI_ISL_1662556, EPI_ISL_1662557, EPI_ISL_1662558, EPI_ISL_1662559, EPI_ISL_1662560, EPI_ISL_1662561, EPI_ISL_1662562, EPI_ISL_1662563, EPI_ISL_1662564, EPI_ISL_1662565, EPI_ISL_1662566, EPI_ISL_1662567, EPI_ISL_1662568, EPI_ISL_1662569, EPI_ISL_1662570, EPI_ISL_1662571, EPI_ISL_1662572, EPI_ISL_1662573, EPI_ISL_1662574, EPI_ISL_1662575, EPI_ISL_1662576 |                              |                                                              | Martinetti Lucchini Gladys, Valeria Spina                                                                                                                                                                                                                                                                                                                                                                                                                               |
| see above                                                                                                                                                                                                                                                                                                                                                                                                                                                                                                                                                                                                                                                                                                                                                                                                                     | Laboratorio di Microbiologia | Laboratorio di Microbiologia                                 |                                                                                                                                                                                                                                                                                                                                                                                                                                                                         |
| EPI_ISL_1663681                                                                                                                                                                                                                                                                                                                                                                                                                                                                                                                                                                                                                                                                                                                                                                                                               | Kantonsspital Schaffhausen   | Institute of Medical Virology                                | Verena Kufner, Gabriela Ziltener, Maryam Zaheri, Stefan Schmutz, Annette Audigé, Maria Grünberg, Kevin Steiner, Jon Huder, Cyril Shah, Riccarda Capaul, Guido Bloemberg, Jürg Böni, Michael Huber, Alexandra Trkola                                                                                                                                                                                                                                                     |
| EPI_ISL_1663682, EPI_ISL_1663683                                                                                                                                                                                                                                                                                                                                                                                                                                                                                                                                                                                                                                                                                                                                                                                              | Buergerspital Solothurn      | Institute of Medical Virology                                | Verena Kufner, Gabriela Ziltener, Maryam Zaheri, Stefan Schmutz, Annette Audigé, Maria Grünberg, Kevin Steiner, Jon Huder, Cyril Shah, Riccarda Capaul, Guido Bloemberg, Jürg Böni, Michael Huber, Alexandra Trkola                                                                                                                                                                                                                                                     |
| EPI_ISL_1663684                                                                                                                                                                                                                                                                                                                                                                                                                                                                                                                                                                                                                                                                                                                                                                                                               | Labor Team W AG              | Institute of Medical Virology                                | Verena Kufner, Gabriela Ziltener, Maryam Zaheri, Stefan Schmutz, Annette Audigé, Maria Grünberg, Kevin Steiner, Jon Huder, Cyril Shah, Riccarda Capaul, Guido Bloemberg, Jürg Böni, Michael Huber, Alexandra Trkola                                                                                                                                                                                                                                                     |
| EPI_ISL_1663685                                                                                                                                                                                                                                                                                                                                                                                                                                                                                                                                                                                                                                                                                                                                                                                                               | Stadspital Triemli           | Institute of Medical Virology                                | Verena Kufner, Gabriela Ziltener, Maryam Zaheri, Stefan Schmutz, Annette Audigé, Maria Grünberg, Kevin Steiner, Jon Huder, Cyril Shah, Riccarda Capaul, Guido Bloemberg, Jürg Böni, Michael Huber, Alexandra Trkola                                                                                                                                                                                                                                                     |
| EPI_ISL_1663686                                                                                                                                                                                                                                                                                                                                                                                                                                                                                                                                                                                                                                                                                                                                                                                                               | Spital Limmattal             | Institute of Medical Virology                                | Verena Kufner, Gabriela Ziltener, Maryam Zaheri, Stefan Schmutz, Annette Audigé, Maria Grünberg, Kevin Steiner, Jon Huder, Cyril Shah, Riccarda Capaul, Guido Bloemberg, Jürg Böni, Michael Huber, Alexandra Trkola                                                                                                                                                                                                                                                     |
| EPI_ISL_1663687, EPI_ISL_1663688                                                                                                                                                                                                                                                                                                                                                                                                                                                                                                                                                                                                                                                                                                                                                                                              | JDMT Medical Services AG     | Institute of Medical Virology                                | Verena Kufner, Gabriela Ziltener, Maryam Zaheri, Stefan Schmutz, Annette Audigé, Maria Grünberg, Kevin Steiner, Jon Huder, Cyril Shah, Riccarda Capaul, Guido Bloemberg, Jürg Böni, Michael Huber, Alexandra Trkola                                                                                                                                                                                                                                                     |
| EPI_ISL_1663689, EPI_ISL_1663690, EPI_ISL_1663691                                                                                                                                                                                                                                                                                                                                                                                                                                                                                                                                                                                                                                                                                                                                                                             | Spital Limmattal             | Institute of Medical Virology                                | Verena Kufner, Gabriela Ziltener, Maryam Zaheri, Stefan Schmutz, Annette Audigé, Maria Grünberg, Kevin Steiner, Jon Huder, Cyril Shah, Riccarda Capaul, Guido Bloemberg, Jürg Böni, Michael Huber, Alexandra Trkola                                                                                                                                                                                                                                                     |
| EPI_ISL_1663692                                                                                                                                                                                                                                                                                                                                                                                                                                                                                                                                                                                                                                                                                                                                                                                                               | Testzentrum Dübendorf        | Institute of Medical Virology                                | Verena Kufner, Gabriela Ziltener, Maryam Zaheri, Stefan Schmutz, Annette Audigé, Maria Grünberg, Kevin Steiner, Jon Huder, Cyril Shah, Riccarda Capaul, Guido Bloemberg, Jürg Böni, Michael Huber, Alexandra Trkola                                                                                                                                                                                                                                                     |
| EPI_ISL_1663693, EPI_ISL_1663694,                                                                                                                                                                                                                                                                                                                                                                                                                                                                                                                                                                                                                                                                                                                                                                                             | Spital Limmattal             | Institute of Medical Virology                                | Verena Kufner, Gabriela Ziltener, Maryam Zaheri, Stefan Schmutz, Annette Audigé, Maria Grünberg, Kevin Steiner, Jon Huder, Cyril Shah, Riccarda                                                                                                                                                                                                                                                                                                                         |

|                                                                                                                                                                                                                                                                                                                                                                                                                                                                                                                                                                                                                                                                                                                                                                                                                                                                                                                                                                                                                                                                                                                                                                                                                                                                                                                                                                                                                                                                                                                                                        |                               |                                                              |                                                                                                                                                                                                                                                                                                                                                                                                                                                                         |
|--------------------------------------------------------------------------------------------------------------------------------------------------------------------------------------------------------------------------------------------------------------------------------------------------------------------------------------------------------------------------------------------------------------------------------------------------------------------------------------------------------------------------------------------------------------------------------------------------------------------------------------------------------------------------------------------------------------------------------------------------------------------------------------------------------------------------------------------------------------------------------------------------------------------------------------------------------------------------------------------------------------------------------------------------------------------------------------------------------------------------------------------------------------------------------------------------------------------------------------------------------------------------------------------------------------------------------------------------------------------------------------------------------------------------------------------------------------------------------------------------------------------------------------------------------|-------------------------------|--------------------------------------------------------------|-------------------------------------------------------------------------------------------------------------------------------------------------------------------------------------------------------------------------------------------------------------------------------------------------------------------------------------------------------------------------------------------------------------------------------------------------------------------------|
| EPI_ISL_1663695, EPI_ISL_1663696,<br>EPI_ISL_1663697, EPI_ISL_1663698                                                                                                                                                                                                                                                                                                                                                                                                                                                                                                                                                                                                                                                                                                                                                                                                                                                                                                                                                                                                                                                                                                                                                                                                                                                                                                                                                                                                                                                                                  |                               |                                                              | Capaul, Guido Bloemberg, Jürg Böni, Michael Huber, Alexandra Trkola                                                                                                                                                                                                                                                                                                                                                                                                     |
| EPI_ISL_1663699                                                                                                                                                                                                                                                                                                                                                                                                                                                                                                                                                                                                                                                                                                                                                                                                                                                                                                                                                                                                                                                                                                                                                                                                                                                                                                                                                                                                                                                                                                                                        | UniversitätsSpital Zürich     | Institute of Medical Virology                                | Verena Kufner, Gabriela Ziltener, Maryam Zaheri, Stefan Schmutz, Annette Audigé, Maria Grünberg, Kevin Steiner, Jon Huder, Cyril Shah, Riccarda Capaul, Guido Bloemberg, Jürg Böni, Michael Huber, Alexandra Trkola                                                                                                                                                                                                                                                     |
| EPI_ISL_1663700                                                                                                                                                                                                                                                                                                                                                                                                                                                                                                                                                                                                                                                                                                                                                                                                                                                                                                                                                                                                                                                                                                                                                                                                                                                                                                                                                                                                                                                                                                                                        | UniversitätsSpital Zürich 009 | Institute of Medical Virology                                | Verena Kufner, Gabriela Ziltener, Maryam Zaheri, Stefan Schmutz, Annette Audigé, Maria Grünberg, Kevin Steiner, Jon Huder, Cyril Shah, Riccarda Capaul, Guido Bloemberg, Jürg Böni, Michael Huber, Alexandra Trkola                                                                                                                                                                                                                                                     |
| EPI_ISL_1663701                                                                                                                                                                                                                                                                                                                                                                                                                                                                                                                                                                                                                                                                                                                                                                                                                                                                                                                                                                                                                                                                                                                                                                                                                                                                                                                                                                                                                                                                                                                                        | USZ Flughafen                 | Institute of Medical Virology                                | Verena Kufner, Gabriela Ziltener, Maryam Zaheri, Stefan Schmutz, Annette Audigé, Maria Grünberg, Kevin Steiner, Jon Huder, Cyril Shah, Riccarda Capaul, Guido Bloemberg, Jürg Böni, Michael Huber, Alexandra Trkola                                                                                                                                                                                                                                                     |
| EPI_ISL_1663702, EPI_ISL_1663703,<br>EPI_ISL_1663704, EPI_ISL_1663705,<br>EPI_ISL_1663706, EPI_ISL_1663707,<br>EPI_ISL_1663708, EPI_ISL_1663709,<br>EPI_ISL_1663710                                                                                                                                                                                                                                                                                                                                                                                                                                                                                                                                                                                                                                                                                                                                                                                                                                                                                                                                                                                                                                                                                                                                                                                                                                                                                                                                                                                    | Spital Limmattal              | Institute of Medical Virology                                | Verena Kufner, Gabriela Ziltener, Maryam Zaheri, Stefan Schmutz, Annette Audigé, Maria Grünberg, Kevin Steiner, Jon Huder, Cyril Shah, Riccarda Capaul, Guido Bloemberg, Jürg Böni, Michael Huber, Alexandra Trkola                                                                                                                                                                                                                                                     |
| EPI_ISL_1663711                                                                                                                                                                                                                                                                                                                                                                                                                                                                                                                                                                                                                                                                                                                                                                                                                                                                                                                                                                                                                                                                                                                                                                                                                                                                                                                                                                                                                                                                                                                                        | Spital Männedorf AG           | Institute of Medical Virology                                | Verena Kufner, Gabriela Ziltener, Maryam Zaheri, Stefan Schmutz, Annette Audigé, Maria Grünberg, Kevin Steiner, Jon Huder, Cyril Shah, Riccarda Capaul, Guido Bloemberg, Jürg Böni, Michael Huber, Alexandra Trkola                                                                                                                                                                                                                                                     |
| EPI_ISL_1663712, EPI_ISL_1663713,<br>EPI_ISL_1663714                                                                                                                                                                                                                                                                                                                                                                                                                                                                                                                                                                                                                                                                                                                                                                                                                                                                                                                                                                                                                                                                                                                                                                                                                                                                                                                                                                                                                                                                                                   | Spital Limmattal              | Institute of Medical Virology                                | Verena Kufner, Gabriela Ziltener, Maryam Zaheri, Stefan Schmutz, Annette Audigé, Maria Grünberg, Kevin Steiner, Jon Huder, Cyril Shah, Riccarda Capaul, Guido Bloemberg, Jürg Böni, Michael Huber, Alexandra Trkola                                                                                                                                                                                                                                                     |
| EPI_ISL_1663715                                                                                                                                                                                                                                                                                                                                                                                                                                                                                                                                                                                                                                                                                                                                                                                                                                                                                                                                                                                                                                                                                                                                                                                                                                                                                                                                                                                                                                                                                                                                        | USZ Flughafen                 | Institute of Medical Virology                                | Verena Kufner, Gabriela Ziltener, Maryam Zaheri, Stefan Schmutz, Annette Audigé, Maria Grünberg, Kevin Steiner, Jon Huder, Cyril Shah, Riccarda Capaul, Guido Bloemberg, Jürg Böni, Michael Huber, Alexandra Trkola                                                                                                                                                                                                                                                     |
| EPI_ISL_1663716                                                                                                                                                                                                                                                                                                                                                                                                                                                                                                                                                                                                                                                                                                                                                                                                                                                                                                                                                                                                                                                                                                                                                                                                                                                                                                                                                                                                                                                                                                                                        | UniversitätsSpital Zürich 009 | Institute of Medical Virology                                | Verena Kufner, Gabriela Ziltener, Maryam Zaheri, Stefan Schmutz, Annette Audigé, Maria Grünberg, Kevin Steiner, Jon Huder, Cyril Shah, Riccarda Capaul, Guido Bloemberg, Jürg Böni, Michael Huber, Alexandra Trkola                                                                                                                                                                                                                                                     |
| EPI_ISL_1663717, EPI_ISL_1663718,<br>EPI_ISL_1663719, EPI_ISL_1663720,<br>EPI_ISL_1663721, EPI_ISL_1663722,<br>EPI_ISL_1663723                                                                                                                                                                                                                                                                                                                                                                                                                                                                                                                                                                                                                                                                                                                                                                                                                                                                                                                                                                                                                                                                                                                                                                                                                                                                                                                                                                                                                         | Spital Limmattal              | Institute of Medical Virology                                | Verena Kufner, Gabriela Ziltener, Maryam Zaheri, Stefan Schmutz, Annette Audigé, Maria Grünberg, Kevin Steiner, Jon Huder, Cyril Shah, Riccarda Capaul, Guido Bloemberg, Jürg Böni, Michael Huber, Alexandra Trkola                                                                                                                                                                                                                                                     |
| EPI_ISL_1675093, EPI_ISL_1675143,<br>EPI_ISL_1675206, EPI_ISL_1675220,<br>EPI_ISL_1675221, EPI_ISL_1675228                                                                                                                                                                                                                                                                                                                                                                                                                                                                                                                                                                                                                                                                                                                                                                                                                                                                                                                                                                                                                                                                                                                                                                                                                                                                                                                                                                                                                                             | Viollier AG                   | Viollier AG                                                  | Andrea Patrizia Salzmann, Henriette Kurth, Christiane Beckmann, Maurice Redondo, Olivier Kobel, Christoph Noppen                                                                                                                                                                                                                                                                                                                                                        |
| EPI_ISL_1682173, EPI_ISL_1682182, EPI_ISL_1682195, EPI_ISL_1682204, EPI_ISL_1682207, EPI_ISL_1682249, EPI_ISL_1682263, EPI_ISL_1682307, EPI_ISL_1682347, EPI_ISL_1682379, EPI_ISL_1682390, EPI_ISL_1682398, EPI_ISL_1682417, EPI_ISL_1682425, EPI_ISL_1682433, EPI_ISL_1682436, EPI_ISL_1682479, EPI_ISL_1682488, EPI_ISL_1682492, EPI_ISL_1682507, EPI_ISL_1682514, EPI_ISL_1682520, EPI_ISL_1682529, EPI_ISL_1682538, EPI_ISL_1682539, EPI_ISL_1682541, EPI_ISL_1682542, EPI_ISL_1682544, EPI_ISL_1682551, EPI_ISL_1682553, EPI_ISL_1682557, EPI_ISL_1682566, EPI_ISL_1682579, EPI_ISL_1682580, EPI_ISL_1682582, EPI_ISL_1682588, EPI_ISL_1682616, EPI_ISL_1682620, EPI_ISL_1682623, EPI_ISL_1682626, EPI_ISL_1682637, EPI_ISL_1682654, EPI_ISL_1682683, EPI_ISL_1682688, EPI_ISL_1682700, EPI_ISL_1682709, EPI_ISL_1682719, EPI_ISL_1682722, EPI_ISL_1682726, EPI_ISL_1682733, EPI_ISL_1682740, EPI_ISL_1682741, EPI_ISL_1682749, EPI_ISL_1682752, EPI_ISL_1682753, EPI_ISL_1682759, EPI_ISL_1682764, EPI_ISL_1682765, EPI_ISL_1682767, EPI_ISL_1682768, EPI_ISL_1682776, EPI_ISL_1682786, EPI_ISL_1682793, EPI_ISL_1682795, EPI_ISL_1682797, EPI_ISL_1682800, EPI_ISL_1682801, EPI_ISL_1682803, EPI_ISL_1682804, EPI_ISL_1682807, EPI_ISL_1682815, EPI_ISL_1682816, EPI_ISL_1682819, EPI_ISL_1682826, EPI_ISL_1682831, EPI_ISL_1682858, EPI_ISL_1682861, EPI_ISL_1682863, EPI_ISL_1682878, EPI_ISL_1682881, EPI_ISL_1682882, EPI_ISL_1682962, EPI_ISL_1682998, EPI_ISL_1683000, EPI_ISL_1683027, EPI_ISL_1683051, EPI_ISL_1683063, EPI_ISL_1683066 | see above                     | Department of Biosystems Science and Engineering, ETH Zürich | Chaoran Chen, Sarah Nadeau, Catharine Aquino, Ivan Topolsky, Philipp Jablonski, Lara Fuhrmann, David Drefuss, Katharina Jahn, Andreia Cabral de Gouvea, Maria Domenica Moccia, Simon Grüter, Timothy Sykes, Lennart Opitz, Griffin White, Laura Neff, Doris Popovic, Andrea Patrignani, Jay Tracy, Ralph Schlapbach, Christiane Beckmann, Maurice Redondo, Olivier Kobel, Christoph Noppen, Sophie Seidel, Noemie Santamaria de Souza, Niko Beerenwinkel, Tanja Stadler |
| EPI_ISL_1697378, EPI_ISL_1697382,<br>EPI_ISL_1697389, EPI_ISL_1697411                                                                                                                                                                                                                                                                                                                                                                                                                                                                                                                                                                                                                                                                                                                                                                                                                                                                                                                                                                                                                                                                                                                                                                                                                                                                                                                                                                                                                                                                                  | Viollier AG                   | Viollier AG                                                  | Andrea Patrizia Salzmann, Henriette Kurth, Christiane Beckmann, Maurice Redondo, Olivier Kobel, Christoph Noppen                                                                                                                                                                                                                                                                                                                                                        |
| EPI_ISL_1701352                                                                                                                                                                                                                                                                                                                                                                                                                                                                                                                                                                                                                                                                                                                                                                                                                                                                                                                                                                                                                                                                                                                                                                                                                                                                                                                                                                                                                                                                                                                                        | synlab Luzern                 | Institute of Medical Virology                                | Verena Kufner, Gabriela Ziltener, Maryam Zaheri, Stefan Schmutz, Annette Audigé, Maria Grünberg, Kevin Steiner, Jon Huder, Cyril Shah, Riccarda Capaul, Guido Bloemberg, Jürg Böni, Michael Huber, Alexandra Trkola                                                                                                                                                                                                                                                     |
| EPI_ISL_1701353                                                                                                                                                                                                                                                                                                                                                                                                                                                                                                                                                                                                                                                                                                                                                                                                                                                                                                                                                                                                                                                                                                                                                                                                                                                                                                                                                                                                                                                                                                                                        | Laborgemeinschaft 1           | Institute of Medical Virology                                | Verena Kufner, Gabriela Ziltener, Maryam Zaheri, Stefan Schmutz, Annette Audigé, Maria Grünberg, Kevin Steiner, Jon Huder, Cyril Shah, Riccarda Capaul, Guido Bloemberg, Jürg Böni, Michael Huber, Alexandra Trkola                                                                                                                                                                                                                                                     |
| EPI_ISL_1701354                                                                                                                                                                                                                                                                                                                                                                                                                                                                                                                                                                                                                                                                                                                                                                                                                                                                                                                                                                                                                                                                                                                                                                                                                                                                                                                                                                                                                                                                                                                                        | Stadtspital Triemli           | Institute of Medical Virology                                | Verena Kufner, Gabriela Ziltener, Maryam Zaheri, Stefan Schmutz, Annette Audigé, Maria Grünberg, Kevin Steiner, Jon Huder, Cyril Shah, Riccarda Capaul, Guido Bloemberg, Jürg Böni, Michael Huber, Alexandra Trkola                                                                                                                                                                                                                                                     |
| EPI_ISL_1701355                                                                                                                                                                                                                                                                                                                                                                                                                                                                                                                                                                                                                                                                                                                                                                                                                                                                                                                                                                                                                                                                                                                                                                                                                                                                                                                                                                                                                                                                                                                                        | Invenimus AG                  | Institute of Medical Virology                                | Verena Kufner, Gabriela Ziltener, Maryam Zaheri, Stefan Schmutz, Annette Audigé, Maria Grünberg, Kevin Steiner, Jon Huder, Cyril Shah, Riccarda Capaul, Guido Bloemberg, Jürg Böni, Michael Huber, Alexandra Trkola                                                                                                                                                                                                                                                     |
| EPI_ISL_1701356                                                                                                                                                                                                                                                                                                                                                                                                                                                                                                                                                                                                                                                                                                                                                                                                                                                                                                                                                                                                                                                                                                                                                                                                                                                                                                                                                                                                                                                                                                                                        | Spital Limmattal              | Institute of Medical Virology                                | Verena Kufner, Gabriela Ziltener, Maryam Zaheri, Stefan Schmutz, Annette Audigé, Maria Grünberg, Kevin Steiner, Jon Huder, Cyril Shah, Riccarda Capaul, Guido Bloemberg, Jürg Böni, Michael Huber, Alexandra Trkola                                                                                                                                                                                                                                                     |
| EPI_ISL_1701357                                                                                                                                                                                                                                                                                                                                                                                                                                                                                                                                                                                                                                                                                                                                                                                                                                                                                                                                                                                                                                                                                                                                                                                                                                                                                                                                                                                                                                                                                                                                        | UniversitätsSpital Zürich 009 | Institute of Medical Virology                                | Verena Kufner, Gabriela Ziltener, Maryam Zaheri, Stefan Schmutz, Annette Audigé, Maria Grünberg, Kevin Steiner, Jon Huder, Cyril Shah, Riccarda Capaul, Guido Bloemberg, Jürg Böni, Michael Huber, Alexandra Trkola                                                                                                                                                                                                                                                     |
| EPI_ISL_1701358, EPI_ISL_1701359,<br>EPI_ISL_1701360                                                                                                                                                                                                                                                                                                                                                                                                                                                                                                                                                                                                                                                                                                                                                                                                                                                                                                                                                                                                                                                                                                                                                                                                                                                                                                                                                                                                                                                                                                   | Spital Männedorf AG           | Institute of Medical Virology                                | Verena Kufner, Gabriela Ziltener, Maryam Zaheri, Stefan Schmutz, Annette Audigé, Maria Grünberg, Kevin Steiner, Jon Huder, Cyril Shah, Riccarda Capaul, Guido Bloemberg, Jürg Böni, Michael Huber, Alexandra Trkola                                                                                                                                                                                                                                                     |
| EPI_ISL_1701361                                                                                                                                                                                                                                                                                                                                                                                                                                                                                                                                                                                                                                                                                                                                                                                                                                                                                                                                                                                                                                                                                                                                                                                                                                                                                                                                                                                                                                                                                                                                        | UniversitätsSpital Zürich 009 | Institute of Medical Virology                                | Verena Kufner, Gabriela Ziltener, Maryam Zaheri, Stefan Schmutz, Annette Audigé, Maria Grünberg, Kevin Steiner, Jon Huder, Cyril Shah, Riccarda Capaul, Guido Bloemberg, Jürg Böni, Michael Huber, Alexandra Trkola                                                                                                                                                                                                                                                     |
| EPI_ISL_1701362                                                                                                                                                                                                                                                                                                                                                                                                                                                                                                                                                                                                                                                                                                                                                                                                                                                                                                                                                                                                                                                                                                                                                                                                                                                                                                                                                                                                                                                                                                                                        | Universitätsspital Zürich 046 | Institute of Medical Virology                                | Verena Kufner, Gabriela Ziltener, Maryam Zaheri, Stefan Schmutz, Annette Audigé, Maria Grünberg, Kevin Steiner, Jon Huder, Cyril Shah, Riccarda Capaul, Guido Bloemberg, Jürg Böni, Michael Huber, Alexandra Trkola                                                                                                                                                                                                                                                     |
| EPI_ISL_1701363                                                                                                                                                                                                                                                                                                                                                                                                                                                                                                                                                                                                                                                                                                                                                                                                                                                                                                                                                                                                                                                                                                                                                                                                                                                                                                                                                                                                                                                                                                                                        | GZO Spital Wetzikon           | Institute of Medical Virology                                | Verena Kufner, Gabriela Ziltener, Maryam Zaheri, Stefan Schmutz, Annette Audigé, Maria Grünberg, Kevin Steiner, Jon Huder, Cyril Shah, Riccarda Capaul, Guido Bloemberg, Jürg Böni, Michael Huber, Alexandra Trkola                                                                                                                                                                                                                                                     |
| EPI_ISL_1701364                                                                                                                                                                                                                                                                                                                                                                                                                                                                                                                                                                                                                                                                                                                                                                                                                                                                                                                                                                                                                                                                                                                                                                                                                                                                                                                                                                                                                                                                                                                                        | Spital Männedorf AG           | Institute of Medical Virology                                | Verena Kufner, Gabriela Ziltener, Maryam Zaheri, Stefan Schmutz, Annette Audigé, Maria Grünberg, Kevin Steiner, Jon Huder, Cyril Shah, Riccarda Capaul, Guido Bloemberg, Jürg Böni, Michael Huber, Alexandra Trkola                                                                                                                                                                                                                                                     |
| EPI_ISL_1701365, EPI_ISL_1701366                                                                                                                                                                                                                                                                                                                                                                                                                                                                                                                                                                                                                                                                                                                                                                                                                                                                                                                                                                                                                                                                                                                                                                                                                                                                                                                                                                                                                                                                                                                       | UniversitätsSpital Zürich 009 | Institute of Medical Virology                                | Verena Kufner, Gabriela Ziltener, Maryam Zaheri, Stefan Schmutz, Annette Audigé, Maria Grünberg, Kevin Steiner, Jon Huder, Cyril Shah, Riccarda Capaul, Guido Bloemberg, Jürg Böni, Michael Huber, Alexandra Trkola                                                                                                                                                                                                                                                     |
| EPI_ISL_1701367, EPI_ISL_1701368,<br>EPI_ISL_1701369, EPI_ISL_1701370                                                                                                                                                                                                                                                                                                                                                                                                                                                                                                                                                                                                                                                                                                                                                                                                                                                                                                                                                                                                                                                                                                                                                                                                                                                                                                                                                                                                                                                                                  | Spital Limmattal              | Institute of Medical Virology                                | Verena Kufner, Gabriela Ziltener, Maryam Zaheri, Stefan Schmutz, Annette Audigé, Maria Grünberg, Kevin Steiner, Jon Huder, Cyril Shah, Riccarda Capaul, Guido Bloemberg, Jürg Böni, Michael Huber, Alexandra Trkola                                                                                                                                                                                                                                                     |
| EPI_ISL_1701371                                                                                                                                                                                                                                                                                                                                                                                                                                                                                                                                                                                                                                                                                                                                                                                                                                                                                                                                                                                                                                                                                                                                                                                                                                                                                                                                                                                                                                                                                                                                        | Spital Männedorf AG           | Institute of Medical Virology                                | Verena Kufner, Gabriela Ziltener, Maryam Zaheri, Stefan Schmutz, Annette Audigé, Maria Grünberg, Kevin Steiner, Jon Huder, Cyril Shah, Riccarda Capaul, Guido Bloemberg, Jürg Böni, Michael Huber, Alexandra Trkola                                                                                                                                                                                                                                                     |
| EPI_ISL_1701372, EPI_ISL_1701373                                                                                                                                                                                                                                                                                                                                                                                                                                                                                                                                                                                                                                                                                                                                                                                                                                                                                                                                                                                                                                                                                                                                                                                                                                                                                                                                                                                                                                                                                                                       | Spital Limmattal              | Institute of Medical Virology                                | Verena Kufner, Gabriela Ziltener, Maryam Zaheri, Stefan Schmutz, Annette Audigé, Maria Grünberg, Kevin Steiner, Jon Huder, Cyril Shah, Riccarda Capaul, Guido Bloemberg, Jürg Böni, Michael Huber, Alexandra Trkola                                                                                                                                                                                                                                                     |
| EPI_ISL_1701374                                                                                                                                                                                                                                                                                                                                                                                                                                                                                                                                                                                                                                                                                                                                                                                                                                                                                                                                                                                                                                                                                                                                                                                                                                                                                                                                                                                                                                                                                                                                        | Spital Männedorf AG           | Institute of Medical Virology                                | Verena Kufner, Gabriela Ziltener, Maryam Zaheri, Stefan Schmutz, Annette Audigé, Maria Grünberg, Kevin Steiner, Jon Huder, Cyril Shah, Riccarda Capaul, Guido Bloemberg, Jürg Böni, Michael Huber, Alexandra Trkola                                                                                                                                                                                                                                                     |
| EPI_ISL_1701375                                                                                                                                                                                                                                                                                                                                                                                                                                                                                                                                                                                                                                                                                                                                                                                                                                                                                                                                                                                                                                                                                                                                                                                                                                                                                                                                                                                                                                                                                                                                        | Spital Limmattal              | Institute of Medical Virology                                | Verena Kufner, Gabriela Ziltener, Maryam Zaheri, Stefan Schmutz, Annette Audigé, Maria Grünberg, Kevin Steiner, Jon Huder, Cyril Shah, Riccarda                                                                                                                                                                                                                                                                                                                         |

|                                                                                                                                                                                                                                                                                                                                                                                                                                                                                                                                                                                                                                                                                                                                                                                                                                                                                                                                                                                                                                                                                                                                                                                                                                                                                                                                                                                                                                                                                                                                                                                                                                                                                                                                                                                                                                                                                                                                                                                                                                                                                                                                                                                                                                                                                                                                                                                                                                                                                                                                                                                                                                                                                                                                                                                                                                                                                                                                                                                                                                                                                                                                                                                                                                                                                                                                                                                                                                                                                                                                                                                                                                                                                                                                                                                                                                                                                                                                                                                                                                                                                                                                                                                                                                                                                                                                                                                                                                                                                                                                                                                                                                                                                                                                                                                                                                                                                                                                                                                                                                                                                                                                                                                                                                                                                                                                                                                                                                                                                      |                                                        |                                                                     |                                                                                                                                                                                                                                                                                                                                                                                                                                                                         |
|--------------------------------------------------------------------------------------------------------------------------------------------------------------------------------------------------------------------------------------------------------------------------------------------------------------------------------------------------------------------------------------------------------------------------------------------------------------------------------------------------------------------------------------------------------------------------------------------------------------------------------------------------------------------------------------------------------------------------------------------------------------------------------------------------------------------------------------------------------------------------------------------------------------------------------------------------------------------------------------------------------------------------------------------------------------------------------------------------------------------------------------------------------------------------------------------------------------------------------------------------------------------------------------------------------------------------------------------------------------------------------------------------------------------------------------------------------------------------------------------------------------------------------------------------------------------------------------------------------------------------------------------------------------------------------------------------------------------------------------------------------------------------------------------------------------------------------------------------------------------------------------------------------------------------------------------------------------------------------------------------------------------------------------------------------------------------------------------------------------------------------------------------------------------------------------------------------------------------------------------------------------------------------------------------------------------------------------------------------------------------------------------------------------------------------------------------------------------------------------------------------------------------------------------------------------------------------------------------------------------------------------------------------------------------------------------------------------------------------------------------------------------------------------------------------------------------------------------------------------------------------------------------------------------------------------------------------------------------------------------------------------------------------------------------------------------------------------------------------------------------------------------------------------------------------------------------------------------------------------------------------------------------------------------------------------------------------------------------------------------------------------------------------------------------------------------------------------------------------------------------------------------------------------------------------------------------------------------------------------------------------------------------------------------------------------------------------------------------------------------------------------------------------------------------------------------------------------------------------------------------------------------------------------------------------------------------------------------------------------------------------------------------------------------------------------------------------------------------------------------------------------------------------------------------------------------------------------------------------------------------------------------------------------------------------------------------------------------------------------------------------------------------------------------------------------------------------------------------------------------------------------------------------------------------------------------------------------------------------------------------------------------------------------------------------------------------------------------------------------------------------------------------------------------------------------------------------------------------------------------------------------------------------------------------------------------------------------------------------------------------------------------------------------------------------------------------------------------------------------------------------------------------------------------------------------------------------------------------------------------------------------------------------------------------------------------------------------------------------------------------------------------------------------------------------------------------------------------------------------|--------------------------------------------------------|---------------------------------------------------------------------|-------------------------------------------------------------------------------------------------------------------------------------------------------------------------------------------------------------------------------------------------------------------------------------------------------------------------------------------------------------------------------------------------------------------------------------------------------------------------|
|                                                                                                                                                                                                                                                                                                                                                                                                                                                                                                                                                                                                                                                                                                                                                                                                                                                                                                                                                                                                                                                                                                                                                                                                                                                                                                                                                                                                                                                                                                                                                                                                                                                                                                                                                                                                                                                                                                                                                                                                                                                                                                                                                                                                                                                                                                                                                                                                                                                                                                                                                                                                                                                                                                                                                                                                                                                                                                                                                                                                                                                                                                                                                                                                                                                                                                                                                                                                                                                                                                                                                                                                                                                                                                                                                                                                                                                                                                                                                                                                                                                                                                                                                                                                                                                                                                                                                                                                                                                                                                                                                                                                                                                                                                                                                                                                                                                                                                                                                                                                                                                                                                                                                                                                                                                                                                                                                                                                                                                                                      |                                                        | Capaul, Guido Bloemberg, Jürg Böni, Michael Huber, Alexandra Trkoka |                                                                                                                                                                                                                                                                                                                                                                                                                                                                         |
| EPI_ISL_1701376, EPI_ISL_1701377, EPI_ISL_1701378, EPI_ISL_1701379, EPI_ISL_1701380                                                                                                                                                                                                                                                                                                                                                                                                                                                                                                                                                                                                                                                                                                                                                                                                                                                                                                                                                                                                                                                                                                                                                                                                                                                                                                                                                                                                                                                                                                                                                                                                                                                                                                                                                                                                                                                                                                                                                                                                                                                                                                                                                                                                                                                                                                                                                                                                                                                                                                                                                                                                                                                                                                                                                                                                                                                                                                                                                                                                                                                                                                                                                                                                                                                                                                                                                                                                                                                                                                                                                                                                                                                                                                                                                                                                                                                                                                                                                                                                                                                                                                                                                                                                                                                                                                                                                                                                                                                                                                                                                                                                                                                                                                                                                                                                                                                                                                                                                                                                                                                                                                                                                                                                                                                                                                                                                                                                  | Spital Männedorf AG                                    | Institute of Medical Virology                                       | Verena Kufner, Gabriela Ziltener, Maryam Zaheri, Stefan Schmutz, Annette Audigé, Maria Grünberg, Kevin Steiner, Jon Huder, Cyril Shah, Riccarda Capaul, Guido Bloemberg, Jürg Böni, Michael Huber, Alexandra Trkoka                                                                                                                                                                                                                                                     |
| EPI_ISL_1701382, EPI_ISL_1701383                                                                                                                                                                                                                                                                                                                                                                                                                                                                                                                                                                                                                                                                                                                                                                                                                                                                                                                                                                                                                                                                                                                                                                                                                                                                                                                                                                                                                                                                                                                                                                                                                                                                                                                                                                                                                                                                                                                                                                                                                                                                                                                                                                                                                                                                                                                                                                                                                                                                                                                                                                                                                                                                                                                                                                                                                                                                                                                                                                                                                                                                                                                                                                                                                                                                                                                                                                                                                                                                                                                                                                                                                                                                                                                                                                                                                                                                                                                                                                                                                                                                                                                                                                                                                                                                                                                                                                                                                                                                                                                                                                                                                                                                                                                                                                                                                                                                                                                                                                                                                                                                                                                                                                                                                                                                                                                                                                                                                                                     | Spital Limmattal                                       | Institute of Medical Virology                                       | Verena Kufner, Gabriela Ziltener, Maryam Zaheri, Stefan Schmutz, Annette Audigé, Maria Grünberg, Kevin Steiner, Jon Huder, Cyril Shah, Riccarda Capaul, Guido Bloemberg, Jürg Böni, Michael Huber, Alexandra Trkoka                                                                                                                                                                                                                                                     |
| EPI_ISL_1701384                                                                                                                                                                                                                                                                                                                                                                                                                                                                                                                                                                                                                                                                                                                                                                                                                                                                                                                                                                                                                                                                                                                                                                                                                                                                                                                                                                                                                                                                                                                                                                                                                                                                                                                                                                                                                                                                                                                                                                                                                                                                                                                                                                                                                                                                                                                                                                                                                                                                                                                                                                                                                                                                                                                                                                                                                                                                                                                                                                                                                                                                                                                                                                                                                                                                                                                                                                                                                                                                                                                                                                                                                                                                                                                                                                                                                                                                                                                                                                                                                                                                                                                                                                                                                                                                                                                                                                                                                                                                                                                                                                                                                                                                                                                                                                                                                                                                                                                                                                                                                                                                                                                                                                                                                                                                                                                                                                                                                                                                      | UniversitätsSpital Zürich                              | Institute of Medical Virology                                       | Verena Kufner, Gabriela Ziltener, Maryam Zaheri, Stefan Schmutz, Annette Audigé, Maria Grünberg, Kevin Steiner, Jon Huder, Cyril Shah, Riccarda Capaul, Guido Bloemberg, Jürg Böni, Michael Huber, Alexandra Trkoka                                                                                                                                                                                                                                                     |
| EPI_ISL_1701385                                                                                                                                                                                                                                                                                                                                                                                                                                                                                                                                                                                                                                                                                                                                                                                                                                                                                                                                                                                                                                                                                                                                                                                                                                                                                                                                                                                                                                                                                                                                                                                                                                                                                                                                                                                                                                                                                                                                                                                                                                                                                                                                                                                                                                                                                                                                                                                                                                                                                                                                                                                                                                                                                                                                                                                                                                                                                                                                                                                                                                                                                                                                                                                                                                                                                                                                                                                                                                                                                                                                                                                                                                                                                                                                                                                                                                                                                                                                                                                                                                                                                                                                                                                                                                                                                                                                                                                                                                                                                                                                                                                                                                                                                                                                                                                                                                                                                                                                                                                                                                                                                                                                                                                                                                                                                                                                                                                                                                                                      | Spital Männedorf AG                                    | Institute of Medical Virology                                       | Verena Kufner, Gabriela Ziltener, Maryam Zaheri, Stefan Schmutz, Annette Audigé, Maria Grünberg, Kevin Steiner, Jon Huder, Cyril Shah, Riccarda Capaul, Guido Bloemberg, Jürg Böni, Michael Huber, Alexandra Trkoka                                                                                                                                                                                                                                                     |
| EPI_ISL_1701667, EPI_ISL_1701668, EPI_ISL_1701670, EPI_ISL_1701671, EPI_ISL_1701672, EPI_ISL_1701673                                                                                                                                                                                                                                                                                                                                                                                                                                                                                                                                                                                                                                                                                                                                                                                                                                                                                                                                                                                                                                                                                                                                                                                                                                                                                                                                                                                                                                                                                                                                                                                                                                                                                                                                                                                                                                                                                                                                                                                                                                                                                                                                                                                                                                                                                                                                                                                                                                                                                                                                                                                                                                                                                                                                                                                                                                                                                                                                                                                                                                                                                                                                                                                                                                                                                                                                                                                                                                                                                                                                                                                                                                                                                                                                                                                                                                                                                                                                                                                                                                                                                                                                                                                                                                                                                                                                                                                                                                                                                                                                                                                                                                                                                                                                                                                                                                                                                                                                                                                                                                                                                                                                                                                                                                                                                                                                                                                 | Institute for Infectious Diseases                      | Institute for Infectious Diseases                                   | Alban Ramette, Stefan Neuenschwander, Christian Baumann, Miguel A Terrazos Miani, Cora Säggerer, Pascal Bittel, Peter Keller, Franziska Suter-Riniker, Stephen L Leib                                                                                                                                                                                                                                                                                                   |
| EPI_ISL_1703840, EPI_ISL_1703849, EPI_ISL_1703857, EPI_ISL_1703867, EPI_ISL_1703874, EPI_ISL_1703885, EPI_ISL_1703897, EPI_ISL_1703905, EPI_ISL_1703919, EPI_ISL_1703926, EPI_ISL_1703936, EPI_ISL_1703947, EPI_ISL_1703958, EPI_ISL_1703970, EPI_ISL_1703980, EPI_ISL_1703991, EPI_ISL_1703998, EPI_ISL_1704010, EPI_ISL_1704023, EPI_ISL_1704031, EPI_ISL_1704041, EPI_ISL_1704051, EPI_ISL_1704059, EPI_ISL_1704068, EPI_ISL_1704075, EPI_ISL_1704087, EPI_ISL_1704098, EPI_ISL_1704112, EPI_ISL_1704124, EPI_ISL_1704136, EPI_ISL_1704147, EPI_ISL_1704160, EPI_ISL_1704171, EPI_ISL_1704184, EPI_ISL_1704192, EPI_ISL_1704204, EPI_ISL_1704216, EPI_ISL_1704228, EPI_ISL_1704239, EPI_ISL_1704248, EPI_ISL_1704260, EPI_ISL_1704273, EPI_ISL_1704286, EPI_ISL_1704296, EPI_ISL_1704305, EPI_ISL_1704317                                                                                                                                                                                                                                                                                                                                                                                                                                                                                                                                                                                                                                                                                                                                                                                                                                                                                                                                                                                                                                                                                                                                                                                                                                                                                                                                                                                                                                                                                                                                                                                                                                                                                                                                                                                                                                                                                                                                                                                                                                                                                                                                                                                                                                                                                                                                                                                                                                                                                                                                                                                                                                                                                                                                                                                                                                                                                                                                                                                                                                                                                                                                                                                                                                                                                                                                                                                                                                                                                                                                                                                                                                                                                                                                                                                                                                                                                                                                                                                                                                                                                                                                                                                                                                                                                                                                                                                                                                                                                                                                                                                                                                                                         | Center for Laboratory Medicine                         | Center for Laboratory Medicine                                      |                                                                                                                                                                                                                                                                                                                                                                                                                                                                         |
| see above                                                                                                                                                                                                                                                                                                                                                                                                                                                                                                                                                                                                                                                                                                                                                                                                                                                                                                                                                                                                                                                                                                                                                                                                                                                                                                                                                                                                                                                                                                                                                                                                                                                                                                                                                                                                                                                                                                                                                                                                                                                                                                                                                                                                                                                                                                                                                                                                                                                                                                                                                                                                                                                                                                                                                                                                                                                                                                                                                                                                                                                                                                                                                                                                                                                                                                                                                                                                                                                                                                                                                                                                                                                                                                                                                                                                                                                                                                                                                                                                                                                                                                                                                                                                                                                                                                                                                                                                                                                                                                                                                                                                                                                                                                                                                                                                                                                                                                                                                                                                                                                                                                                                                                                                                                                                                                                                                                                                                                                                            | Center for Laboratory Medicine                         | Center for Laboratory Medicine                                      | Yannick Gerth                                                                                                                                                                                                                                                                                                                                                                                                                                                           |
| EPI_ISL_1707955, EPI_ISL_1707956, EPI_ISL_1707957, EPI_ISL_1707958, EPI_ISL_1707959, EPI_ISL_1707960, EPI_ISL_1707961, EPI_ISL_1707962, EPI_ISL_1707963, EPI_ISL_1707964, EPI_ISL_1707965, EPI_ISL_1707966, EPI_ISL_1707967, EPI_ISL_1707968, EPI_ISL_1707969, EPI_ISL_1707970, EPI_ISL_1707971, EPI_ISL_1707972, EPI_ISL_1707973, EPI_ISL_1707974, EPI_ISL_1707975, EPI_ISL_1707976, EPI_ISL_1707977, EPI_ISL_1707978, EPI_ISL_1707979, EPI_ISL_1707980, EPI_ISL_1707981, EPI_ISL_1707982, EPI_ISL_1707983, EPI_ISL_1707984, EPI_ISL_1707985, EPI_ISL_1707986, EPI_ISL_1707987, EPI_ISL_1707988, EPI_ISL_1707989, EPI_ISL_1707990, EPI_ISL_1707991, EPI_ISL_1707992, EPI_ISL_1707993, EPI_ISL_1707994, EPI_ISL_1707995, EPI_ISL_1707996, EPI_ISL_1707997, EPI_ISL_1707998, EPI_ISL_1707999, EPI_ISL_1708000, EPI_ISL_1708001, EPI_ISL_1708002, EPI_ISL_1708003, EPI_ISL_1708004, EPI_ISL_1708005, EPI_ISL_1708006, EPI_ISL_1708007, EPI_ISL_1708008, EPI_ISL_1708009, EPI_ISL_1708010, EPI_ISL_1708011, EPI_ISL_1708012, EPI_ISL_1708013, EPI_ISL_1708014, EPI_ISL_1708015, EPI_ISL_1708016, EPI_ISL_1708017, EPI_ISL_1708018, EPI_ISL_1708019, EPI_ISL_1708020, EPI_ISL_1708021, EPI_ISL_1708022, EPI_ISL_1708023, EPI_ISL_1708024, EPI_ISL_1708025, EPI_ISL_1708026, EPI_ISL_1708027, EPI_ISL_1708028, EPI_ISL_1708029, EPI_ISL_1708030, EPI_ISL_1708031, EPI_ISL_1708032, EPI_ISL_1708033, EPI_ISL_1708034, EPI_ISL_1708035, EPI_ISL_1708036, EPI_ISL_1708037, EPI_ISL_1708038, EPI_ISL_1708039, EPI_ISL_1708040, EPI_ISL_1708041, EPI_ISL_1708042, EPI_ISL_1708043, EPI_ISL_1708044, EPI_ISL_1708045, EPI_ISL_1708046, EPI_ISL_1708047, EPI_ISL_1708048, EPI_ISL_1708049, EPI_ISL_1708050, EPI_ISL_1708051, EPI_ISL_1708052, EPI_ISL_1708053, EPI_ISL_1708054, EPI_ISL_1708055, EPI_ISL_1708056, EPI_ISL_1708057, EPI_ISL_1708058, EPI_ISL_1708059, EPI_ISL_1708060, EPI_ISL_1708061, EPI_ISL_1708062, EPI_ISL_1708063, EPI_ISL_1708064, EPI_ISL_1708065, EPI_ISL_1708066, EPI_ISL_1708067, EPI_ISL_1708068, EPI_ISL_1708069, EPI_ISL_1708070, EPI_ISL_1708071, EPI_ISL_1708072, EPI_ISL_1708073, EPI_ISL_1708074, EPI_ISL_1708075, EPI_ISL_1708076, EPI_ISL_1708077, EPI_ISL_1708078, EPI_ISL_1708079, EPI_ISL_1708080, EPI_ISL_1708081, EPI_ISL_1708082, EPI_ISL_1708083, EPI_ISL_1708084, EPI_ISL_1708085, EPI_ISL_1708086, EPI_ISL_1708087, EPI_ISL_1708088, EPI_ISL_1708089, EPI_ISL_1708090, EPI_ISL_1708091, EPI_ISL_1708092, EPI_ISL_1708093, EPI_ISL_1708094, EPI_ISL_1708095, EPI_ISL_1708096, EPI_ISL_1708097, EPI_ISL_1708098, EPI_ISL_1708099, EPI_ISL_1708100, EPI_ISL_1708101, EPI_ISL_1708102, EPI_ISL_1708103, EPI_ISL_1708104, EPI_ISL_1708105, EPI_ISL_1708106, EPI_ISL_1708107, EPI_ISL_1708108, EPI_ISL_1708109, EPI_ISL_1708110, EPI_ISL_1708111, EPI_ISL_1708112, EPI_ISL_1708113, EPI_ISL_1708114, EPI_ISL_1708115, EPI_ISL_1708116, EPI_ISL_1708117, EPI_ISL_1708118, EPI_ISL_1708119, EPI_ISL_1708120, EPI_ISL_1708121, EPI_ISL_1708122, EPI_ISL_1708123, EPI_ISL_1708124, EPI_ISL_1708125, EPI_ISL_1708126, EPI_ISL_1708127, EPI_ISL_1708128, EPI_ISL_1708129, EPI_ISL_1708130, EPI_ISL_1708131, EPI_ISL_1708132, EPI_ISL_1708133, EPI_ISL_1708134, EPI_ISL_1708135, EPI_ISL_1708136, EPI_ISL_1708137, EPI_ISL_1708138, EPI_ISL_1708139, EPI_ISL_1708140, EPI_ISL_1708141, EPI_ISL_1708142, EPI_ISL_1708143, EPI_ISL_1708144, EPI_ISL_1708145, EPI_ISL_1708146, EPI_ISL_1708147, EPI_ISL_1708148, EPI_ISL_1708149, EPI_ISL_1708150, EPI_ISL_1708151, EPI_ISL_1708152, EPI_ISL_1708153, EPI_ISL_1708154, EPI_ISL_1708155, EPI_ISL_1708156, EPI_ISL_1708157, EPI_ISL_1708158, EPI_ISL_1708159, EPI_ISL_1708160, EPI_ISL_1708161, EPI_ISL_1708162, EPI_ISL_1708163, EPI_ISL_1708164, EPI_ISL_1708165, EPI_ISL_1708166, EPI_ISL_1708167, EPI_ISL_1708168, EPI_ISL_1708169, EPI_ISL_1708170, EPI_ISL_1708171, EPI_ISL_1708172, EPI_ISL_1708173, EPI_ISL_1708174, EPI_ISL_1708175, EPI_ISL_1708176, EPI_ISL_1708177, EPI_ISL_1708178, EPI_ISL_1708179, EPI_ISL_1708180, EPI_ISL_1708181, EPI_ISL_1708182, EPI_ISL_1708183, EPI_ISL_1708184, EPI_ISL_1708185, EPI_ISL_1708186, EPI_ISL_1708187, EPI_ISL_1708188, EPI_ISL_1708189, EPI_ISL_1708190, EPI_ISL_1708191, EPI_ISL_1708192, EPI_ISL_1708193, EPI_ISL_1708194, EPI_ISL_1708195, EPI_ISL_1708196, EPI_ISL_1708197, EPI_ISL_1708198, EPI_ISL_1708199, EPI_ISL_1708200, EPI_ISL_1708201, EPI_ISL_1708202, EPI_ISL_1708203, EPI_ISL_1708204, EPI_ISL_1708205, EPI_ISL_1708206, EPI_ISL_1708207, EPI_ISL_1708208, EPI_ISL_1708209, EPI_ISL_1708210, EPI_ISL_1708211, EPI_ISL_1708212, EPI_ISL_1708213, EPI_ISL_1708214, EPI_ISL_1708215, EPI_ISL_1708216, EPI_ISL_1708217, EPI_ISL_1708218, EPI_ISL_1708219, EPI_ISL_1708220, EPI_ISL_1708221, EPI_ISL_1708222, EPI_ISL_1708223, EPI_ISL_1708224, EPI_ISL_1708225, EPI_ISL_1708226, EPI_ISL_1708227, EPI_ISL_1708228, EPI_ISL_1708229, EPI_ISL_1708230, EPI_ISL_1708231, EPI_ISL_1710015, EPI_ISL_1710016, EPI_ISL_1710017, EPI_ISL_1710018, EPI_ISL_1710019, EPI_ISL_1710020, EPI_ISL_1710021, EPI_ISL_1710022, EPI_ISL_1710023, EPI_ISL_1710024, EPI_ISL_1710025, EPI_ISL_1710026, EPI_ISL_1710027, EPI_ISL_1710028, EPI_ISL_1710029, EPI_ISL_1710030, EPI_ISL_1710031, EPI_ISL_1710032, EPI_ISL_1710033, EPI_ISL_1710034, EPI_ISL_1710035, EPI_ISL_1710036, EPI_ISL_1710037, EPI_ISL_1710038, EPI_ISL_1710039, EPI_ISL_1710040, EPI_ISL_1710041, EPI_ISL_1710042, EPI_ISL_1710043, EPI_ISL_1710044, EPI_ISL_1710045, EPI_ISL_1710046, EPI_ISL_1710047 | University Hospitals of Geneva, Laboratory of Virology | HUG, Laboratory of Virology and the Health2030 Genome Center        | Samuel Cordey, Ana Rita Goncalves, Laurent Kaiser, Lorenzo Cerutti, Henri Pegeot, Melyssa Elies, Deborah Penet, Keith Harshman, Ioannis Xenarios, Emmanouil Dermizakis                                                                                                                                                                                                                                                                                                  |
| EPI_ISL_1748443, EPI_ISL_1748448                                                                                                                                                                                                                                                                                                                                                                                                                                                                                                                                                                                                                                                                                                                                                                                                                                                                                                                                                                                                                                                                                                                                                                                                                                                                                                                                                                                                                                                                                                                                                                                                                                                                                                                                                                                                                                                                                                                                                                                                                                                                                                                                                                                                                                                                                                                                                                                                                                                                                                                                                                                                                                                                                                                                                                                                                                                                                                                                                                                                                                                                                                                                                                                                                                                                                                                                                                                                                                                                                                                                                                                                                                                                                                                                                                                                                                                                                                                                                                                                                                                                                                                                                                                                                                                                                                                                                                                                                                                                                                                                                                                                                                                                                                                                                                                                                                                                                                                                                                                                                                                                                                                                                                                                                                                                                                                                                                                                                                                     | Synlab Suisse S.A                                      | Clinical Bacteriology                                               | Tim Roloff, Madlen Stange, Helena MB Seth-Smith, Alfredo Mari, Karoline Leuzinger, Julia Bielicki, Manuel Battegay, Hans Hirsch, Adrian Egli                                                                                                                                                                                                                                                                                                                            |
| EPI_ISL_1748463, EPI_ISL_1748499                                                                                                                                                                                                                                                                                                                                                                                                                                                                                                                                                                                                                                                                                                                                                                                                                                                                                                                                                                                                                                                                                                                                                                                                                                                                                                                                                                                                                                                                                                                                                                                                                                                                                                                                                                                                                                                                                                                                                                                                                                                                                                                                                                                                                                                                                                                                                                                                                                                                                                                                                                                                                                                                                                                                                                                                                                                                                                                                                                                                                                                                                                                                                                                                                                                                                                                                                                                                                                                                                                                                                                                                                                                                                                                                                                                                                                                                                                                                                                                                                                                                                                                                                                                                                                                                                                                                                                                                                                                                                                                                                                                                                                                                                                                                                                                                                                                                                                                                                                                                                                                                                                                                                                                                                                                                                                                                                                                                                                                     | Clinical Virology                                      | Clinical Bacteriology                                               | Tim Roloff, Madlen Stange, Helena MB Seth-Smith, Alfredo Mari, Karoline Leuzinger, Julia Bielicki, Manuel Battegay, Hans Hirsch, Adrian Egli                                                                                                                                                                                                                                                                                                                            |
| EPI_ISL_1749682, EPI_ISL_1749684, EPI_ISL_1749688                                                                                                                                                                                                                                                                                                                                                                                                                                                                                                                                                                                                                                                                                                                                                                                                                                                                                                                                                                                                                                                                                                                                                                                                                                                                                                                                                                                                                                                                                                                                                                                                                                                                                                                                                                                                                                                                                                                                                                                                                                                                                                                                                                                                                                                                                                                                                                                                                                                                                                                                                                                                                                                                                                                                                                                                                                                                                                                                                                                                                                                                                                                                                                                                                                                                                                                                                                                                                                                                                                                                                                                                                                                                                                                                                                                                                                                                                                                                                                                                                                                                                                                                                                                                                                                                                                                                                                                                                                                                                                                                                                                                                                                                                                                                                                                                                                                                                                                                                                                                                                                                                                                                                                                                                                                                                                                                                                                                                                    | Viollier AG                                            | Department of Biosystems Science and Engineering, ETH Zürich        | Chaoran Chen, Sarah Nadeau, Catharine Aquino, Ivan Topolsky, Philipp Jablonski, Lara Fuhrmann, David Dreifuss, Katharina Jahn, Andrea Cabral de Gouvea, Maria Domenica Moccia, Simon Grüter, Timothy Sykes, Lennart Opitz, Griffin White, Laura Neff, Doris Popovic, Andrea Patrignani, Jay Tracy, Ralph Schlapbach, Christiane Beckmann, Maurice Redondo, Olivier Kobel, Christoph Noppen, Sophie Seidel, Noemie Santamaria de Souza, Niko Beerenwinkel, Tanja Stadler |
| EPI_ISL_1749689                                                                                                                                                                                                                                                                                                                                                                                                                                                                                                                                                                                                                                                                                                                                                                                                                                                                                                                                                                                                                                                                                                                                                                                                                                                                                                                                                                                                                                                                                                                                                                                                                                                                                                                                                                                                                                                                                                                                                                                                                                                                                                                                                                                                                                                                                                                                                                                                                                                                                                                                                                                                                                                                                                                                                                                                                                                                                                                                                                                                                                                                                                                                                                                                                                                                                                                                                                                                                                                                                                                                                                                                                                                                                                                                                                                                                                                                                                                                                                                                                                                                                                                                                                                                                                                                                                                                                                                                                                                                                                                                                                                                                                                                                                                                                                                                                                                                                                                                                                                                                                                                                                                                                                                                                                                                                                                                                                                                                                                                      | Viollier AG                                            | Department of Biosystems Science and Engineering, ETH Zürich        | Chaoran Chen, Sarah Nadeau, Ivan Topolsky, Emmanouil Dermizakis, Keith Harshman, Ioannis Xenarios, Henri Pegeot, Lorenzo Cerutti, Deborah Penet, Philipp Jablonski, Lara Fuhrmann, David Dreifuss, Katharina Jahn, Christiane Beckmann, Maurice Redondo, Olivier Kobel, Christoph Noppen, Sophie Seidel, Noemie Santamaria de Souza, Niko Beerenwinkel, Tanja Stadler                                                                                                   |
| EPI_ISL_1749692, EPI_ISL_1749695                                                                                                                                                                                                                                                                                                                                                                                                                                                                                                                                                                                                                                                                                                                                                                                                                                                                                                                                                                                                                                                                                                                                                                                                                                                                                                                                                                                                                                                                                                                                                                                                                                                                                                                                                                                                                                                                                                                                                                                                                                                                                                                                                                                                                                                                                                                                                                                                                                                                                                                                                                                                                                                                                                                                                                                                                                                                                                                                                                                                                                                                                                                                                                                                                                                                                                                                                                                                                                                                                                                                                                                                                                                                                                                                                                                                                                                                                                                                                                                                                                                                                                                                                                                                                                                                                                                                                                                                                                                                                                                                                                                                                                                                                                                                                                                                                                                                                                                                                                                                                                                                                                                                                                                                                                                                                                                                                                                                                                                     | Viollier AG                                            | Department of Biosystems Science and Engineering, ETH Zürich        | Christian Beisel, Sarah Nadeau, Chaoran Chen, Ivan Topolsky, Philipp Jablonski, Lara Fuhrmann, David Dreifuss, Katharina Jahn, Rebecca Denes, Mirjam Feldkamp, Ina Nissen, Natascha Santacroce, Elodie Burcklen, Christiane Beckmann, Maurice Redondo, Olivier Kobel, Christoph Noppen, Sophie Seidel, Noemie Santamaria de Souza, Niko Beerenwinkel, Tanja Stadler                                                                                                     |
| EPI_ISL_1749696                                                                                                                                                                                                                                                                                                                                                                                                                                                                                                                                                                                                                                                                                                                                                                                                                                                                                                                                                                                                                                                                                                                                                                                                                                                                                                                                                                                                                                                                                                                                                                                                                                                                                                                                                                                                                                                                                                                                                                                                                                                                                                                                                                                                                                                                                                                                                                                                                                                                                                                                                                                                                                                                                                                                                                                                                                                                                                                                                                                                                                                                                                                                                                                                                                                                                                                                                                                                                                                                                                                                                                                                                                                                                                                                                                                                                                                                                                                                                                                                                                                                                                                                                                                                                                                                                                                                                                                                                                                                                                                                                                                                                                                                                                                                                                                                                                                                                                                                                                                                                                                                                                                                                                                                                                                                                                                                                                                                                                                                      | Viollier AG                                            | Department of Biosystems Science and Engineering, ETH Zürich        | Chaoran Chen, Sarah Nadeau, Ivan Topolsky, Emmanouil Dermizakis, Keith Harshman, Ioannis Xenarios, Henri Pegeot, Lorenzo Cerutti, Deborah Penet, Philipp Jablonski, Lara Fuhrmann, David Dreifuss, Katharina Jahn, Christiane Beckmann, Maurice Redondo, Olivier Kobel, Christoph Noppen, Sophie Seidel, Noemie Santamaria de Souza, Niko Beerenwinkel, Tanja Stadler                                                                                                   |
| EPI_ISL_1749697, EPI_ISL_1749698                                                                                                                                                                                                                                                                                                                                                                                                                                                                                                                                                                                                                                                                                                                                                                                                                                                                                                                                                                                                                                                                                                                                                                                                                                                                                                                                                                                                                                                                                                                                                                                                                                                                                                                                                                                                                                                                                                                                                                                                                                                                                                                                                                                                                                                                                                                                                                                                                                                                                                                                                                                                                                                                                                                                                                                                                                                                                                                                                                                                                                                                                                                                                                                                                                                                                                                                                                                                                                                                                                                                                                                                                                                                                                                                                                                                                                                                                                                                                                                                                                                                                                                                                                                                                                                                                                                                                                                                                                                                                                                                                                                                                                                                                                                                                                                                                                                                                                                                                                                                                                                                                                                                                                                                                                                                                                                                                                                                                                                     | Viollier AG                                            | Department of Biosystems Science and Engineering, ETH Zürich        | Chaoran Chen, Sarah Nadeau, Catharine Aquino, Ivan Topolsky, Philipp Jablonski, Lara Fuhrmann, David Dreifuss, Katharina Jahn, Andrea Cabral de Gouvea, Maria Domenica Moccia, Simon Grüter, Timothy Sykes, Lennart Opitz, Griffin White, Laura Neff, Doris Popovic, Andrea Patrignani, Jay Tracy, Ralph Schlapbach, Christiane Beckmann, Maurice Redondo, Olivier Kobel, Christoph Noppen, Sophie Seidel, Noemie Santamaria de Souza, Niko Beerenwinkel, Tanja Stadler |
| EPI_ISL_1749700, EPI_ISL_1749705                                                                                                                                                                                                                                                                                                                                                                                                                                                                                                                                                                                                                                                                                                                                                                                                                                                                                                                                                                                                                                                                                                                                                                                                                                                                                                                                                                                                                                                                                                                                                                                                                                                                                                                                                                                                                                                                                                                                                                                                                                                                                                                                                                                                                                                                                                                                                                                                                                                                                                                                                                                                                                                                                                                                                                                                                                                                                                                                                                                                                                                                                                                                                                                                                                                                                                                                                                                                                                                                                                                                                                                                                                                                                                                                                                                                                                                                                                                                                                                                                                                                                                                                                                                                                                                                                                                                                                                                                                                                                                                                                                                                                                                                                                                                                                                                                                                                                                                                                                                                                                                                                                                                                                                                                                                                                                                                                                                                                                                     | Viollier AG                                            | Department of Biosystems Science and Engineering, ETH Zürich        | Chaoran Chen, Sarah Nadeau, Ivan Topolsky, Emmanouil Dermizakis, Keith Harshman, Ioannis Xenarios, Henri Pegeot, Lorenzo Cerutti, Deborah Penet, Philipp Jablonski, Lara Fuhrmann, David Dreifuss, Katharina Jahn, Christiane Beckmann, Maurice Redondo, Olivier Kobel, Christoph Noppen, Sophie Seidel, Noemie Santamaria de Souza, Niko Beerenwinkel, Tanja Stadler                                                                                                   |
| EPI_ISL_1749706, EPI_ISL_1749710, EPI_ISL_1749711, EPI_ISL_1749712, EPI_ISL_1749713                                                                                                                                                                                                                                                                                                                                                                                                                                                                                                                                                                                                                                                                                                                                                                                                                                                                                                                                                                                                                                                                                                                                                                                                                                                                                                                                                                                                                                                                                                                                                                                                                                                                                                                                                                                                                                                                                                                                                                                                                                                                                                                                                                                                                                                                                                                                                                                                                                                                                                                                                                                                                                                                                                                                                                                                                                                                                                                                                                                                                                                                                                                                                                                                                                                                                                                                                                                                                                                                                                                                                                                                                                                                                                                                                                                                                                                                                                                                                                                                                                                                                                                                                                                                                                                                                                                                                                                                                                                                                                                                                                                                                                                                                                                                                                                                                                                                                                                                                                                                                                                                                                                                                                                                                                                                                                                                                                                                  | Viollier AG                                            | Department of Biosystems Science and Engineering, ETH Zürich        | Chaoran Chen, Sarah Nadeau, Catharine Aquino, Ivan Topolsky, Philipp Jablonski, Lara Fuhrmann, David Dreifuss, Katharina Jahn, Andrea Cabral de Gouvea, Maria Domenica Moccia, Simon Grüter, Timothy Sykes, Lennart Opitz, Griffin White, Laura Neff, Doris Popovic, Andrea Patrignani, Jay Tracy, Ralph Schlapbach, Christiane Beckmann, Maurice Redondo, Olivier Kobel, Christoph Noppen, Sophie Seidel, Noemie Santamaria de Souza, Niko Beerenwinkel, Tanja Stadler |
| EPI_ISL_1749714, EPI_ISL_1749719                                                                                                                                                                                                                                                                                                                                                                                                                                                                                                                                                                                                                                                                                                                                                                                                                                                                                                                                                                                                                                                                                                                                                                                                                                                                                                                                                                                                                                                                                                                                                                                                                                                                                                                                                                                                                                                                                                                                                                                                                                                                                                                                                                                                                                                                                                                                                                                                                                                                                                                                                                                                                                                                                                                                                                                                                                                                                                                                                                                                                                                                                                                                                                                                                                                                                                                                                                                                                                                                                                                                                                                                                                                                                                                                                                                                                                                                                                                                                                                                                                                                                                                                                                                                                                                                                                                                                                                                                                                                                                                                                                                                                                                                                                                                                                                                                                                                                                                                                                                                                                                                                                                                                                                                                                                                                                                                                                                                                                                     | Viollier AG                                            | Department of Biosystems Science and Engineering, ETH Zürich        | Christian Beisel, Sarah Nadeau, Chaoran Chen, Ivan Topolsky, Philipp Jablonski, Lara Fuhrmann, David Dreifuss, Katharina Jahn, Rebecca Denes, Mirjam Feldkamp, Ina Nissen, Natascha Santacroce, Elodie Burcklen, Christiane Beckmann, Maurice Redondo, Olivier Kobel, Christoph Noppen, Sophie Seidel, Noemie Santamaria de Souza, Niko Beerenwinkel, Tanja Stadler                                                                                                     |
| EPI_ISL_1749721, EPI_ISL_1749722                                                                                                                                                                                                                                                                                                                                                                                                                                                                                                                                                                                                                                                                                                                                                                                                                                                                                                                                                                                                                                                                                                                                                                                                                                                                                                                                                                                                                                                                                                                                                                                                                                                                                                                                                                                                                                                                                                                                                                                                                                                                                                                                                                                                                                                                                                                                                                                                                                                                                                                                                                                                                                                                                                                                                                                                                                                                                                                                                                                                                                                                                                                                                                                                                                                                                                                                                                                                                                                                                                                                                                                                                                                                                                                                                                                                                                                                                                                                                                                                                                                                                                                                                                                                                                                                                                                                                                                                                                                                                                                                                                                                                                                                                                                                                                                                                                                                                                                                                                                                                                                                                                                                                                                                                                                                                                                                                                                                                                                     | Viollier AG                                            | Department of Biosystems Science and Engineering, ETH Zürich        | Chaoran Chen, Sarah Nadeau, Ivan Topolsky, Emmanouil Dermizakis, Keith Harshman, Ioannis Xenarios, Henri Pegeot, Lorenzo Cerutti, Deborah Penet, Philipp Jablonski, Lara Fuhrmann, David Dreifuss, Katharina Jahn, Christiane Beckmann, Maurice Redondo, Olivier Kobel, Christoph Noppen, Sophie Seidel, Noemie Santamaria de Souza, Niko Beerenwinkel, Tanja Stadler                                                                                                   |
| EPI_ISL_1749725                                                                                                                                                                                                                                                                                                                                                                                                                                                                                                                                                                                                                                                                                                                                                                                                                                                                                                                                                                                                                                                                                                                                                                                                                                                                                                                                                                                                                                                                                                                                                                                                                                                                                                                                                                                                                                                                                                                                                                                                                                                                                                                                                                                                                                                                                                                                                                                                                                                                                                                                                                                                                                                                                                                                                                                                                                                                                                                                                                                                                                                                                                                                                                                                                                                                                                                                                                                                                                                                                                                                                                                                                                                                                                                                                                                                                                                                                                                                                                                                                                                                                                                                                                                                                                                                                                                                                                                                                                                                                                                                                                                                                                                                                                                                                                                                                                                                                                                                                                                                                                                                                                                                                                                                                                                                                                                                                                                                                                                                      | Viollier AG                                            | Department of Biosystems Science and Engineering, ETH Zürich        | Chaoran Chen, Sarah Nadeau, Catharine Aquino, Ivan Topolsky, Philipp Jablonski, Lara Fuhrmann, David Dreifuss, Katharina Jahn, Andrea Cabral de Gouvea, Maria Domenica Moccia, Simon Grüter, Timothy Sykes, Lennart Opitz, Griffin White, Laura Neff, Doris Popovic, Andrea Patrignani, Jay Tracy, Ralph Schlapbach, Christiane Beckmann, Maurice Redondo, Olivier Kobel, Christoph Noppen, Sophie Seidel, Noemie Santamaria de Souza, Niko Beerenwinkel, Tanja Stadler |
| EPI_ISL_1749729, EPI_ISL_1749730                                                                                                                                                                                                                                                                                                                                                                                                                                                                                                                                                                                                                                                                                                                                                                                                                                                                                                                                                                                                                                                                                                                                                                                                                                                                                                                                                                                                                                                                                                                                                                                                                                                                                                                                                                                                                                                                                                                                                                                                                                                                                                                                                                                                                                                                                                                                                                                                                                                                                                                                                                                                                                                                                                                                                                                                                                                                                                                                                                                                                                                                                                                                                                                                                                                                                                                                                                                                                                                                                                                                                                                                                                                                                                                                                                                                                                                                                                                                                                                                                                                                                                                                                                                                                                                                                                                                                                                                                                                                                                                                                                                                                                                                                                                                                                                                                                                                                                                                                                                                                                                                                                                                                                                                                                                                                                                                                                                                                                                     | Viollier AG                                            | Department of Biosystems Science and Engineering, ETH Zürich        | Christian Beisel, Sarah Nadeau, Chaoran Chen, Ivan Topolsky, Philipp Jablonski, Lara Fuhrmann, David Dreifuss, Katharina Jahn, Rebecca Denes, Mirjam Feldkamp, Ina Nissen, Natascha Santacroce, Elodie Burcklen, Christiane Beckmann, Maurice Redondo, Olivier Kobel, Christoph Noppen, Sophie Seidel, Noemie Santamaria de Souza, Niko Beerenwinkel, Tanja Stadler                                                                                                     |













































|                                                                                                                       |                               |                                                              |                                                                                                                                                                                                                                                                                                                                                                                                                                                                          |
|-----------------------------------------------------------------------------------------------------------------------|-------------------------------|--------------------------------------------------------------|--------------------------------------------------------------------------------------------------------------------------------------------------------------------------------------------------------------------------------------------------------------------------------------------------------------------------------------------------------------------------------------------------------------------------------------------------------------------------|
|                                                                                                                       |                               |                                                              | Capaul, Guido Bloemberg, Jürg Böni, Michael Huber, Alexandra Trkola                                                                                                                                                                                                                                                                                                                                                                                                      |
| EPI_ISL_1911619                                                                                                       | Kantonsspital Winterthur      | Institute of Medical Virology                                | Verena Kufner, Gabriela Ziltener, Maryam Zaheri, Stefan Schmutz, Annette Audigé, Maria Grünberg, Kevin Steiner, Jon Huder, Cyril Shah, Riccarda Capaul, Guido Bloemberg, Jürg Böni, Michael Huber, Alexandra Trkola                                                                                                                                                                                                                                                      |
| EPI_ISL_1911620                                                                                                       | Kinderspital Zürich           | Institute of Medical Virology                                | Verena Kufner, Gabriela Ziltener, Maryam Zaheri, Stefan Schmutz, Annette Audigé, Maria Grünberg, Kevin Steiner, Jon Huder, Cyril Shah, Riccarda Capaul, Guido Bloemberg, Jürg Böni, Michael Huber, Alexandra Trkola                                                                                                                                                                                                                                                      |
| EPI_ISL_1911621, EPI_ISL_1911622                                                                                      | Kantonsspital Baden AG        | Institute of Medical Virology                                | Verena Kufner, Gabriela Ziltener, Maryam Zaheri, Stefan Schmutz, Annette Audigé, Maria Grünberg, Kevin Steiner, Jon Huder, Cyril Shah, Riccarda Capaul, Guido Bloemberg, Jürg Böni, Michael Huber, Alexandra Trkola                                                                                                                                                                                                                                                      |
| EPI_ISL_1911623                                                                                                       | Zentrallabor Zürich           | Institute of Medical Virology                                | Verena Kufner, Gabriela Ziltener, Maryam Zaheri, Stefan Schmutz, Annette Audigé, Maria Grünberg, Kevin Steiner, Jon Huder, Cyril Shah, Riccarda Capaul, Guido Bloemberg, Jürg Böni, Michael Huber, Alexandra Trkola                                                                                                                                                                                                                                                      |
| EPI_ISL_1911624, EPI_ISL_1911625                                                                                      | Kantonsspital Münsterlingen   | Institute of Medical Virology                                | Verena Kufner, Gabriela Ziltener, Maryam Zaheri, Stefan Schmutz, Annette Audigé, Maria Grünberg, Kevin Steiner, Jon Huder, Cyril Shah, Riccarda Capaul, Guido Bloemberg, Jürg Böni, Michael Huber, Alexandra Trkola                                                                                                                                                                                                                                                      |
| EPI_ISL_1911626, EPI_ISL_1911627                                                                                      | Unilabs                       | Institute of Medical Virology                                | Verena Kufner, Gabriela Ziltener, Maryam Zaheri, Stefan Schmutz, Annette Audigé, Maria Grünberg, Kevin Steiner, Jon Huder, Cyril Shah, Riccarda Capaul, Guido Bloemberg, Jürg Böni, Michael Huber, Alexandra Trkola                                                                                                                                                                                                                                                      |
| EPI_ISL_1911628                                                                                                       | Kantonsspital Aarau           | Institute of Medical Virology                                | Verena Kufner, Gabriela Ziltener, Maryam Zaheri, Stefan Schmutz, Annette Audigé, Maria Grünberg, Kevin Steiner, Jon Huder, Cyril Shah, Riccarda Capaul, Guido Bloemberg, Jürg Böni, Michael Huber, Alexandra Trkola                                                                                                                                                                                                                                                      |
| EPI_ISL_1911629, EPI_ISL_1911630                                                                                      | Medica                        | Institute of Medical Virology                                | Verena Kufner, Gabriela Ziltener, Maryam Zaheri, Stefan Schmutz, Annette Audigé, Maria Grünberg, Kevin Steiner, Jon Huder, Cyril Shah, Riccarda Capaul, Guido Bloemberg, Jürg Böni, Michael Huber, Alexandra Trkola                                                                                                                                                                                                                                                      |
| EPI_ISL_1911631                                                                                                       | Kantonsspital Aarau           | Institute of Medical Virology                                | Verena Kufner, Gabriela Ziltener, Maryam Zaheri, Stefan Schmutz, Annette Audigé, Maria Grünberg, Kevin Steiner, Jon Huder, Cyril Shah, Riccarda Capaul, Guido Bloemberg, Jürg Böni, Michael Huber, Alexandra Trkola                                                                                                                                                                                                                                                      |
| EPI_ISL_1911632                                                                                                       | Analytica                     | Institute of Medical Virology                                | Verena Kufner, Gabriela Ziltener, Maryam Zaheri, Stefan Schmutz, Annette Audigé, Maria Grünberg, Kevin Steiner, Jon Huder, Cyril Shah, Riccarda Capaul, Guido Bloemberg, Jürg Böni, Michael Huber, Alexandra Trkola                                                                                                                                                                                                                                                      |
| EPI_ISL_1911633                                                                                                       | UniversitätsSpital Zürich     | Institute of Medical Virology                                | Verena Kufner, Gabriela Ziltener, Maryam Zaheri, Stefan Schmutz, Annette Audigé, Maria Grünberg, Kevin Steiner, Jon Huder, Cyril Shah, Riccarda Capaul, Guido Bloemberg, Jürg Böni, Michael Huber, Alexandra Trkola                                                                                                                                                                                                                                                      |
| EPI_ISL_1911634                                                                                                       | UniversitätsSpital Zürich 009 | Institute of Medical Virology                                | Verena Kufner, Gabriela Ziltener, Maryam Zaheri, Stefan Schmutz, Annette Audigé, Maria Grünberg, Kevin Steiner, Jon Huder, Cyril Shah, Riccarda Capaul, Guido Bloemberg, Jürg Böni, Michael Huber, Alexandra Trkola                                                                                                                                                                                                                                                      |
| EPI_ISL_1911635, EPI_ISL_1911636, EPI_ISL_1911637, EPI_ISL_1911638                                                    | Spital Männedorf AG           | Institute of Medical Virology                                | Verena Kufner, Gabriela Ziltener, Maryam Zaheri, Stefan Schmutz, Annette Audigé, Maria Grünberg, Kevin Steiner, Jon Huder, Cyril Shah, Riccarda Capaul, Guido Bloemberg, Jürg Böni, Michael Huber, Alexandra Trkola                                                                                                                                                                                                                                                      |
| EPI_ISL_1911639, EPI_ISL_1911640, EPI_ISL_1911641, EPI_ISL_1911642, EPI_ISL_1911643, EPI_ISL_1911644, EPI_ISL_1911645 | Spital Limmatthal             | Institute of Medical Virology                                | Verena Kufner, Gabriela Ziltener, Maryam Zaheri, Stefan Schmutz, Annette Audigé, Maria Grünberg, Kevin Steiner, Jon Huder, Cyril Shah, Riccarda Capaul, Guido Bloemberg, Jürg Böni, Michael Huber, Alexandra Trkola                                                                                                                                                                                                                                                      |
| EPI_ISL_1911646, EPI_ISL_1911647, EPI_ISL_1911648, EPI_ISL_1911649, EPI_ISL_1911650, EPI_ISL_1911651                  | Spital Männedorf AG           | Institute of Medical Virology                                | Verena Kufner, Gabriela Ziltener, Maryam Zaheri, Stefan Schmutz, Annette Audigé, Maria Grünberg, Kevin Steiner, Jon Huder, Cyril Shah, Riccarda Capaul, Guido Bloemberg, Jürg Böni, Michael Huber, Alexandra Trkola                                                                                                                                                                                                                                                      |
| EPI_ISL_1911652                                                                                                       | GZO Spital Wetzikon           | Institute of Medical Virology                                | Verena Kufner, Gabriela Ziltener, Maryam Zaheri, Stefan Schmutz, Annette Audigé, Maria Grünberg, Kevin Steiner, Jon Huder, Cyril Shah, Riccarda Capaul, Guido Bloemberg, Jürg Böni, Michael Huber, Alexandra Trkola                                                                                                                                                                                                                                                      |
| EPI_ISL_1911653, EPI_ISL_1911654                                                                                      | Spital Männedorf AG           | Institute of Medical Virology                                | Verena Kufner, Gabriela Ziltener, Maryam Zaheri, Stefan Schmutz, Annette Audigé, Maria Grünberg, Kevin Steiner, Jon Huder, Cyril Shah, Riccarda Capaul, Guido Bloemberg, Jürg Böni, Michael Huber, Alexandra Trkola                                                                                                                                                                                                                                                      |
| EPI_ISL_1913269, EPI_ISL_1913270                                                                                      | Viollier AG                   | Department of Biosystems Science and Engineering, ETH Zurich | Chaoran Chen, Sarah Nadeau, Ivan Topolsky, Emmanouil Dermizakis, Keith Harshman, Ioannis Xenarios, Henri Pegeot, Lorenzo Cerutti, Deborah Penet, Philipp Jablonski, Lara Fuhrmann, David Dreifuss, Katharina Jahn, Christiane Beckmann, Maurice Redondo, Olivier Kobel, Christoph Noppen, Sophie Seidel, Noemie Santamaria de Souza, Niko Beerenwinkel, Tanja Stadler                                                                                                    |
| EPI_ISL_1913271                                                                                                       | Viollier AG                   | Department of Biosystems Science and Engineering, ETH Zurich | Christian Beisel, Sarah Nadeau, Chaoran Chen, Ivan Topolsky, Philipp Jablonski, Lara Fuhrmann, David Dreifuss, Katharina Jahn, Rebecca Denes, Mirjam Feldkamp, Ina Nissen, Natascha Santacroce, Elodie Burcklen, Christiane Beckmann, Maurice Redondo, Olivier Kobel, Christoph Noppen, Sophie Seidel, Noemie Santamaria de Souza, Niko Beerenwinkel, Tanja Stadler                                                                                                      |
| EPI_ISL_1913272, EPI_ISL_1913273                                                                                      | Viollier AG                   | Department of Biosystems Science and Engineering, ETH Zurich | Chaoran Chen, Sarah Nadeau, Catharine Aquino, Ivan Topolsky, Philipp Jablonski, Lara Fuhrmann, David Dreifuss, Katharina Jahn, Andreia Cabral de Gouvea, Maria Domenica Moccia, Simon Gruter, Timothy Sykes, Lennart Opitz, Griffin White, Laura Neff, Doris Popovic, Andrea Patrignani, Jay Tracy, Ralph Schlapbach, Christiane Beckmann, Maurice Redondo, Olivier Kobel, Christoph Noppen, Sophie Seidel, Noemie Santamaria de Souza, Niko Beerenwinkel, Tanja Stadler |
| EPI_ISL_1913274                                                                                                       | Viollier AG                   | Department of Biosystems Science and Engineering, ETH Zurich | Chaoran Chen, Sarah Nadeau, Ivan Topolsky, Emmanouil Dermizakis, Keith Harshman, Ioannis Xenarios, Henri Pegeot, Lorenzo Cerutti, Deborah Penet, Philipp Jablonski, Lara Fuhrmann, David Dreifuss, Katharina Jahn, Christiane Beckmann, Maurice Redondo, Olivier Kobel, Christoph Noppen, Sophie Seidel, Noemie Santamaria de Souza, Niko Beerenwinkel, Tanja Stadler                                                                                                    |
| EPI_ISL_1913275                                                                                                       | Viollier AG                   | Department of Biosystems Science and Engineering, ETH Zurich | Chaoran Chen, Sarah Nadeau, Catharine Aquino, Ivan Topolsky, Philipp Jablonski, Lara Fuhrmann, David Dreifuss, Katharina Jahn, Andreia Cabral de Gouvea, Maria Domenica Moccia, Simon Gruter, Timothy Sykes, Lennart Opitz, Griffin White, Laura Neff, Doris Popovic, Andrea Patrignani, Jay Tracy, Ralph Schlapbach, Christiane Beckmann, Maurice Redondo, Olivier Kobel, Christoph Noppen, Sophie Seidel, Noemie Santamaria de Souza, Niko Beerenwinkel, Tanja Stadler |
| EPI_ISL_1913276                                                                                                       | Viollier AG                   | Department of Biosystems Science and Engineering, ETH Zurich | Chaoran Chen, Sarah Nadeau, Ivan Topolsky, Emmanouil Dermizakis, Keith Harshman, Ioannis Xenarios, Henri Pegeot, Lorenzo Cerutti, Deborah Penet, Philipp Jablonski, Lara Fuhrmann, David Dreifuss, Katharina Jahn, Christiane Beckmann, Maurice Redondo, Olivier Kobel, Christoph Noppen, Sophie Seidel, Noemie Santamaria de Souza, Niko Beerenwinkel, Tanja Stadler                                                                                                    |
| EPI_ISL_1913277                                                                                                       | Viollier AG                   | Department of Biosystems Science and Engineering, ETH Zurich | Chaoran Chen, Sarah Nadeau, Catharine Aquino, Ivan Topolsky, Philipp Jablonski, Lara Fuhrmann, David Dreifuss, Katharina Jahn, Andreia Cabral de Gouvea, Maria Domenica Moccia, Simon Gruter, Timothy Sykes, Lennart Opitz, Griffin White, Laura Neff, Doris Popovic, Andrea Patrignani, Jay Tracy, Ralph Schlapbach, Christiane Beckmann, Maurice Redondo, Olivier Kobel, Christoph Noppen, Sophie Seidel, Noemie Santamaria de Souza, Niko Beerenwinkel, Tanja Stadler |
| EPI_ISL_1913278                                                                                                       | Viollier AG                   | Department of Biosystems Science and Engineering, ETH Zurich | Christian Beisel, Sarah Nadeau, Chaoran Chen, Ivan Topolsky, Philipp Jablonski, Lara Fuhrmann, David Dreifuss, Katharina Jahn, Rebecca Denes, Mirjam Feldkamp, Ina Nissen, Natascha Santacroce, Elodie Burcklen, Christiane Beckmann, Maurice Redondo, Olivier Kobel, Christoph Noppen, Sophie Seidel, Noemie Santamaria de Souza, Niko Beerenwinkel, Tanja Stadler                                                                                                      |
| EPI_ISL_1913279                                                                                                       | Viollier AG                   | Department of Biosystems Science and Engineering, ETH Zurich | Chaoran Chen, Sarah Nadeau, Ivan Topolsky, Emmanouil Dermizakis, Keith Harshman, Ioannis Xenarios, Henri Pegeot, Lorenzo Cerutti, Deborah Penet, Philipp Jablonski, Lara Fuhrmann, David Dreifuss, Katharina Jahn, Christiane Beckmann, Maurice Redondo, Olivier Kobel, Christoph Noppen, Sophie Seidel, Noemie Santamaria de Souza, Niko Beerenwinkel, Tanja Stadler                                                                                                    |
| EPI_ISL_1913280, EPI_ISL_1913281                                                                                      | Viollier AG                   | Department of Biosystems Science and Engineering, ETH Zurich | Christian Beisel, Sarah Nadeau, Chaoran Chen, Ivan Topolsky, Philipp Jablonski, Lara Fuhrmann, David Dreifuss, Katharina Jahn, Rebecca Denes, Mirjam Feldkamp, Ina Nissen, Natascha Santacroce, Elodie Burcklen, Christiane Beckmann, Maurice Redondo, Olivier Kobel, Christoph Noppen, Sophie Seidel, Noemie Santamaria de Souza, Niko Beerenwinkel, Tanja Stadler                                                                                                      |
| EPI_ISL_1913282                                                                                                       | Viollier AG                   | Department of Biosystems Science and Engineering, ETH Zurich | Chaoran Chen, Sarah Nadeau, Catharine Aquino, Ivan Topolsky, Philipp Jablonski, Lara Fuhrmann, David Dreifuss, Katharina Jahn, Andreia Cabral de Gouvea, Maria Domenica Moccia, Simon Gruter, Timothy Sykes, Lennart Opitz, Griffin White, Laura Neff, Doris Popovic, Andrea Patrignani, Jay Tracy,                                                                                                                                                                      |



























































|                                                                                                                                                                                                                                                                                                                                                                                                                                                                                                                                                                |                               |                                                                    |                                                                                                                                                                                                                                                                                                                                                                                                                                                                          |                                                                                                                                                                     |
|----------------------------------------------------------------------------------------------------------------------------------------------------------------------------------------------------------------------------------------------------------------------------------------------------------------------------------------------------------------------------------------------------------------------------------------------------------------------------------------------------------------------------------------------------------------|-------------------------------|--------------------------------------------------------------------|--------------------------------------------------------------------------------------------------------------------------------------------------------------------------------------------------------------------------------------------------------------------------------------------------------------------------------------------------------------------------------------------------------------------------------------------------------------------------|---------------------------------------------------------------------------------------------------------------------------------------------------------------------|
|                                                                                                                                                                                                                                                                                                                                                                                                                                                                                                                                                                |                               |                                                                    | Ralph Schlapbach, Christiane Beckmann, Maurice Redondo, Olivier Kobel, Christoph Noppen, Sophie Seidel, Noemie Santamaria de Souza, Niko Beerenwinkel, Tanja Stadler                                                                                                                                                                                                                                                                                                     |                                                                                                                                                                     |
| EPI_ISL_1914250                                                                                                                                                                                                                                                                                                                                                                                                                                                                                                                                                | Viollier AG                   | Department of Biosystems Science and Engineering, ETH Zurich       | Chaoran Chen, Sarah Nadeau, Ivan Topolsky, Emmanouil Dermitzakis, Keith Harshman, Ioannis Xenarios, Henri Pegeot, Lorenzo Cerutti, Deborah Penet, Philipp Jablonski, Lara Fuhrmann, David Dreifuss, Katharina Jahn, Christiane Beckmann, Maurice Redondo, Olivier Kobel, Christoph Noppen, Sophie Seidel, Noemie Santamaria de Souza, Niko Beerenwinkel, Tanja Stadler                                                                                                   |                                                                                                                                                                     |
| EPI_ISL_1914251                                                                                                                                                                                                                                                                                                                                                                                                                                                                                                                                                | Viollier AG                   | Department of Biosystems Science and Engineering, ETH Zurich       | Chaoran Chen, Sarah Nadeau, Catharine Aquino, Ivan Topolsky, Philipp Jablonski, Lara Fuhrmann, David Dreifuss, Katharina Jahn, Andreia Cabral de Gouvea, Maria Domenica Moccia, Simon Gruter, Timothy Sykes, Lennart Opitz, Griffin White, Laura Neff, Doris Popovic, Andrea Patrignani, Jay Tracy, Ralph Schlapbach, Christiane Beckmann, Maurice Redondo, Olivier Kobel, Christoph Noppen, Sophie Seidel, Noemie Santamaria de Souza, Niko Beerenwinkel, Tanja Stadler |                                                                                                                                                                     |
| EPI_ISL_1914252                                                                                                                                                                                                                                                                                                                                                                                                                                                                                                                                                | Viollier AG                   | Department of Biosystems Science and Engineering, ETH Zurich       | Christian Beisel, Sarah Nadeau, Chaoran Chen, Ivan Topolsky, Philipp Jablonski, Lara Fuhrmann, David Dreifuss, Katharina Jahn, Rebecca Denes, Mirjam Feldkamp, Ina Nissen, Natascha Santacroce, Elodie Burcklen, Christiane Beckmann, Maurice Redondo, Olivier Kobel, Christoph Noppen, Sophie Seidel, Noemie Santamaria de Souza, Niko Beerenwinkel, Tanja Stadler                                                                                                      |                                                                                                                                                                     |
| EPI_ISL_1914253                                                                                                                                                                                                                                                                                                                                                                                                                                                                                                                                                | Viollier AG                   | Department of Biosystems Science and Engineering, ETH Zurich       | Chaoran Chen, Sarah Nadeau, Catharine Aquino, Ivan Topolsky, Philipp Jablonski, Lara Fuhrmann, David Dreifuss, Katharina Jahn, Andreia Cabral de Gouvea, Maria Domenica Moccia, Simon Gruter, Timothy Sykes, Lennart Opitz, Griffin White, Laura Neff, Doris Popovic, Andrea Patrignani, Jay Tracy, Ralph Schlapbach, Christiane Beckmann, Maurice Redondo, Olivier Kobel, Christoph Noppen, Sophie Seidel, Noemie Santamaria de Souza, Niko Beerenwinkel, Tanja Stadler |                                                                                                                                                                     |
| EPI_ISL_1914254                                                                                                                                                                                                                                                                                                                                                                                                                                                                                                                                                | Viollier AG                   | Department of Biosystems Science and Engineering, ETH Zurich       | Christian Beisel, Sarah Nadeau, Chaoran Chen, Ivan Topolsky, Philipp Jablonski, Lara Fuhrmann, David Dreifuss, Katharina Jahn, Rebecca Denes, Mirjam Feldkamp, Ina Nissen, Natascha Santacroce, Elodie Burcklen, Christiane Beckmann, Maurice Redondo, Olivier Kobel, Christoph Noppen, Sophie Seidel, Noemie Santamaria de Souza, Niko Beerenwinkel, Tanja Stadler                                                                                                      |                                                                                                                                                                     |
| EPI_ISL_1914255, EPI_ISL_1914256, EPI_ISL_1914257, EPI_ISL_1914258, EPI_ISL_1914259, EPI_ISL_1914260, EPI_ISL_1914261                                                                                                                                                                                                                                                                                                                                                                                                                                          | Viollier AG                   | Department of Biosystems Science and Engineering, ETH Zurich       | Chaoran Chen, Sarah Nadeau, Catharine Aquino, Ivan Topolsky, Philipp Jablonski, Lara Fuhrmann, David Dreifuss, Katharina Jahn, Andreia Cabral de Gouvea, Maria Domenica Moccia, Simon Gruter, Timothy Sykes, Lennart Opitz, Griffin White, Laura Neff, Doris Popovic, Andrea Patrignani, Jay Tracy, Ralph Schlapbach, Christiane Beckmann, Maurice Redondo, Olivier Kobel, Christoph Noppen, Sophie Seidel, Noemie Santamaria de Souza, Niko Beerenwinkel, Tanja Stadler |                                                                                                                                                                     |
| EPI_ISL_1914262, EPI_ISL_1914263, EPI_ISL_1914264, EPI_ISL_1914265, EPI_ISL_1914266, EPI_ISL_1914267                                                                                                                                                                                                                                                                                                                                                                                                                                                           | Viollier AG                   | Department of Biosystems Science and Engineering, ETH Zurich       | Chaoran Chen, Sarah Nadeau, Ivan Topolsky, Emmanouil Dermitzakis, Keith Harshman, Ioannis Xenarios, Henri Pegeot, Lorenzo Cerutti, Deborah Penet, Philipp Jablonski, Lara Fuhrmann, David Dreifuss, Katharina Jahn, Christiane Beckmann, Maurice Redondo, Olivier Kobel, Christoph Noppen, Sophie Seidel, Noemie Santamaria de Souza, Niko Beerenwinkel, Tanja Stadler                                                                                                   |                                                                                                                                                                     |
| EPI_ISL_1914268                                                                                                                                                                                                                                                                                                                                                                                                                                                                                                                                                | Viollier AG                   | Department of Biosystems Science and Engineering, ETH Zurich       | Christian Beisel, Sarah Nadeau, Chaoran Chen, Ivan Topolsky, Philipp Jablonski, Lara Fuhrmann, David Dreifuss, Katharina Jahn, Rebecca Denes, Mirjam Feldkamp, Ina Nissen, Natascha Santacroce, Elodie Burcklen, Christiane Beckmann, Maurice Redondo, Olivier Kobel, Christoph Noppen, Sophie Seidel, Noemie Santamaria de Souza, Niko Beerenwinkel, Tanja Stadler                                                                                                      |                                                                                                                                                                     |
| EPI_ISL_1914269                                                                                                                                                                                                                                                                                                                                                                                                                                                                                                                                                | Viollier AG                   | Department of Biosystems Science and Engineering, ETH Zurich       | Chaoran Chen, Sarah Nadeau, Ivan Topolsky, Emmanouil Dermitzakis, Keith Harshman, Ioannis Xenarios, Henri Pegeot, Lorenzo Cerutti, Deborah Penet, Philipp Jablonski, Lara Fuhrmann, David Dreifuss, Katharina Jahn, Christiane Beckmann, Maurice Redondo, Olivier Kobel, Christoph Noppen, Sophie Seidel, Noemie Santamaria de Souza, Niko Beerenwinkel, Tanja Stadler                                                                                                   |                                                                                                                                                                     |
| EPI_ISL_1914270                                                                                                                                                                                                                                                                                                                                                                                                                                                                                                                                                | Viollier AG                   | Department of Biosystems Science and Engineering, ETH Zurich       | Christian Beisel, Sarah Nadeau, Chaoran Chen, Ivan Topolsky, Philipp Jablonski, Lara Fuhrmann, David Dreifuss, Katharina Jahn, Rebecca Denes, Mirjam Feldkamp, Ina Nissen, Natascha Santacroce, Elodie Burcklen, Christiane Beckmann, Maurice Redondo, Olivier Kobel, Christoph Noppen, Sophie Seidel, Noemie Santamaria de Souza, Niko Beerenwinkel, Tanja Stadler                                                                                                      |                                                                                                                                                                     |
| EPI_ISL_1914273                                                                                                                                                                                                                                                                                                                                                                                                                                                                                                                                                | Viollier AG                   | Department of Biosystems Science and Engineering, ETH Zurich       | Chaoran Chen, Sarah Nadeau, Catharine Aquino, Ivan Topolsky, Philipp Jablonski, Lara Fuhrmann, David Dreifuss, Katharina Jahn, Andreia Cabral de Gouvea, Maria Domenica Moccia, Simon Gruter, Timothy Sykes, Lennart Opitz, Griffin White, Laura Neff, Doris Popovic, Andrea Patrignani, Jay Tracy, Ralph Schlapbach, Christiane Beckmann, Maurice Redondo, Olivier Kobel, Christoph Noppen, Sophie Seidel, Noemie Santamaria de Souza, Niko Beerenwinkel, Tanja Stadler |                                                                                                                                                                     |
| EPI_ISL_1914607                                                                                                                                                                                                                                                                                                                                                                                                                                                                                                                                                | Viollier AG                   | Clinical Bacteriology                                              | Tim Roloff, Madlen Stange, Helena MB Seth-Smith, Alfredo Mari, Karoline Leuzinger, Julia Bielicki, Christiane Beckmann, Manuel Bategay, Hans Hirsch, Adrian Egli                                                                                                                                                                                                                                                                                                         |                                                                                                                                                                     |
| EPI_ISL_1916499, EPI_ISL_1916500, EPI_ISL_1916501, EPI_ISL_1916502, EPI_ISL_1916503, EPI_ISL_1916504, EPI_ISL_1916505, EPI_ISL_1916506, EPI_ISL_1916507, EPI_ISL_1916508, EPI_ISL_1916509, EPI_ISL_1916510, EPI_ISL_1916511, EPI_ISL_1916512, EPI_ISL_1916513, EPI_ISL_1916514, EPI_ISL_1916515, EPI_ISL_1916516, EPI_ISL_1916517, EPI_ISL_1916518, EPI_ISL_1916519, EPI_ISL_1916520, EPI_ISL_1916521, EPI_ISL_1916522, EPI_ISL_1916523, EPI_ISL_1916524, EPI_ISL_1916525, EPI_ISL_1916526, EPI_ISL_1916527, EPI_ISL_1916528, EPI_ISL_1916529, EPI_ISL_1916530 | see above                     | Institute for Infectious Diseases, University of Bern, Switzerland | Institute for Infectious Diseases, University of Bern, Switzerland                                                                                                                                                                                                                                                                                                                                                                                                       | Stefan Neuschwander, Christian Baumann, Miguel A Terrazos Miani, Cora Sägesser, Pascal Bittel, Peter Keller, Franziska Suter-Riniker, Stephen L Leib, Alban Ramette |
| EPI_ISL_1921771                                                                                                                                                                                                                                                                                                                                                                                                                                                                                                                                                | Spital Männedorf AG           | Institute of Medical Virology                                      | Daniel Ehrsam, Isabel Stürmer, Catharine Aquino, Joel Wirz, Weihong Qi, Hubert Rehrauer, Verena Kufner, Gabriela Ziltener, Maryam Zaheri, Stefan Schmutz, Annette Audigé, Maria Grünberg, Kevin Steiner, Jon Huder, Cyril Shah, Riccarda Capaul, Guido Bloembergen, Jürg Böni, Michael Huber, Alexandra Trkola                                                                                                                                                           |                                                                                                                                                                     |
| EPI_ISL_1921772, EPI_ISL_1921773, EPI_ISL_1921774, EPI_ISL_1921775                                                                                                                                                                                                                                                                                                                                                                                                                                                                                             | Spital Limmattal              | Institute of Medical Virology                                      | Daniel Ehrsam, Isabel Stürmer, Catharine Aquino, Joel Wirz, Weihong Qi, Hubert Rehrauer, Verena Kufner, Gabriela Ziltener, Maryam Zaheri, Stefan Schmutz, Annette Audigé, Maria Grünberg, Kevin Steiner, Jon Huder, Cyril Shah, Riccarda Capaul, Guido Bloembergen, Jürg Böni, Michael Huber, Alexandra Trkola                                                                                                                                                           |                                                                                                                                                                     |
| EPI_ISL_1921776, EPI_ISL_1921777                                                                                                                                                                                                                                                                                                                                                                                                                                                                                                                               | Spital Männedorf AG           | Institute of Medical Virology                                      | Daniel Ehrsam, Isabel Stürmer, Catharine Aquino, Joel Wirz, Weihong Qi, Hubert Rehrauer, Verena Kufner, Gabriela Ziltener, Maryam Zaheri, Stefan Schmutz, Annette Audigé, Maria Grünberg, Kevin Steiner, Jon Huder, Cyril Shah, Riccarda Capaul, Guido Bloembergen, Jürg Böni, Michael Huber, Alexandra Trkola                                                                                                                                                           |                                                                                                                                                                     |
| EPI_ISL_1921778                                                                                                                                                                                                                                                                                                                                                                                                                                                                                                                                                | USZ Flughafen                 | Institute of Medical Virology                                      | Daniel Ehrsam, Isabel Stürmer, Catharine Aquino, Joel Wirz, Weihong Qi, Hubert Rehrauer, Verena Kufner, Gabriela Ziltener, Maryam Zaheri, Stefan Schmutz, Annette Audigé, Maria Grünberg, Kevin Steiner, Jon Huder, Cyril Shah, Riccarda Capaul, Guido Bloembergen, Jürg Böni, Michael Huber, Alexandra Trkola                                                                                                                                                           |                                                                                                                                                                     |
| EPI_ISL_1921779                                                                                                                                                                                                                                                                                                                                                                                                                                                                                                                                                | Spital Limmattal              | Institute of Medical Virology                                      | Daniel Ehrsam, Isabel Stürmer, Catharine Aquino, Joel Wirz, Weihong Qi, Hubert Rehrauer, Verena Kufner, Gabriela Ziltener, Maryam Zaheri, Stefan Schmutz, Annette Audigé, Maria Grünberg, Kevin Steiner, Jon Huder, Cyril Shah, Riccarda Capaul, Guido Bloembergen, Jürg Böni, Michael Huber, Alexandra Trkola                                                                                                                                                           |                                                                                                                                                                     |
| EPI_ISL_1921780, EPI_ISL_1921781                                                                                                                                                                                                                                                                                                                                                                                                                                                                                                                               | Spital Männedorf AG           | Institute of Medical Virology                                      | Daniel Ehrsam, Isabel Stürmer, Catharine Aquino, Joel Wirz, Weihong Qi, Hubert Rehrauer, Verena Kufner, Gabriela Ziltener, Maryam Zaheri, Stefan Schmutz, Annette Audigé, Maria Grünberg, Kevin Steiner, Jon Huder, Cyril Shah, Riccarda Capaul, Guido Bloembergen, Jürg Böni, Michael Huber, Alexandra Trkola                                                                                                                                                           |                                                                                                                                                                     |
| EPI_ISL_1921782, EPI_ISL_1921783                                                                                                                                                                                                                                                                                                                                                                                                                                                                                                                               | Spital Limmattal              | Institute of Medical Virology                                      | Daniel Ehrsam, Isabel Stürmer, Catharine Aquino, Joel Wirz, Weihong Qi, Hubert Rehrauer, Verena Kufner, Gabriela Ziltener, Maryam Zaheri, Stefan Schmutz, Annette Audigé, Maria Grünberg, Kevin Steiner, Jon Huder, Cyril Shah, Riccarda Capaul, Guido Bloembergen, Jürg Böni, Michael Huber, Alexandra Trkola                                                                                                                                                           |                                                                                                                                                                     |
| EPI_ISL_1921784                                                                                                                                                                                                                                                                                                                                                                                                                                                                                                                                                | Verein Lunge Zürich           | Institute of Medical Virology                                      | Daniel Ehrsam, Isabel Stürmer, Catharine Aquino, Joel Wirz, Weihong Qi, Hubert Rehrauer, Verena Kufner, Gabriela Ziltener, Maryam Zaheri, Stefan Schmutz, Annette Audigé, Maria Grünberg, Kevin Steiner, Jon Huder, Cyril Shah, Riccarda Capaul, Guido Bloembergen, Jürg Böni, Michael Huber, Alexandra Trkola                                                                                                                                                           |                                                                                                                                                                     |
| EPI_ISL_1921785, EPI_ISL_1921786, EPI_ISL_1921787, EPI_ISL_1921788                                                                                                                                                                                                                                                                                                                                                                                                                                                                                             | Spital Limmattal              | Institute of Medical Virology                                      | Daniel Ehrsam, Isabel Stürmer, Catharine Aquino, Joel Wirz, Weihong Qi, Hubert Rehrauer, Verena Kufner, Gabriela Ziltener, Maryam Zaheri, Stefan Schmutz, Annette Audigé, Maria Grünberg, Kevin Steiner, Jon Huder, Cyril Shah, Riccarda Capaul, Guido Bloembergen, Jürg Böni, Michael Huber, Alexandra Trkola                                                                                                                                                           |                                                                                                                                                                     |
| EPI_ISL_1921789                                                                                                                                                                                                                                                                                                                                                                                                                                                                                                                                                | UniversitätsSpital Zürich 061 | Institute of Medical Virology                                      | Daniel Ehrsam, Isabel Stürmer, Catharine Aquino, Joel Wirz, Weihong Qi, Hubert Rehrauer, Verena Kufner, Gabriela Ziltener, Maryam Zaheri, Stefan Schmutz, Annette Audigé, Maria Grünberg, Kevin Steiner, Jon Huder, Cyril Shah, Riccarda Capaul, Guido Bloembergen, Jürg Böni, Michael Huber, Alexandra Trkola                                                                                                                                                           |                                                                                                                                                                     |





|                                                                                                                                                                                                                                                                                                                                                                                                                                                                                                                                                                                                                                                                                                                                                                                                                                                                                                                                                                                                                                                                                                                                                                                                                                                                                                                                                                                                                                                                                                                                                                                                                                                                                                                                                                                                                                                                                                                                                                                                                                                                                                                                                                                                                                                                                                                                                                                                                                                                                                                                                                                                                                                                                                                                                                                                                                                                                                                                                                                                                                                                                                                                                                                                                                                                                                                                                                                                                                                                                                                                                                                                                                                                                                                                                                                                                                                                                                                                                                                                                                                                                                                                                                                                                                                                                                                                                                                                                                                                                                                                                                                                                                                                                                                                                                                                                                                                                                                                                                                                                                                                                                                                                                                                                                                                                                                                                                                                                  |                                                        |                                                              |                                                                                                                                                                                                                       |
|------------------------------------------------------------------------------------------------------------------------------------------------------------------------------------------------------------------------------------------------------------------------------------------------------------------------------------------------------------------------------------------------------------------------------------------------------------------------------------------------------------------------------------------------------------------------------------------------------------------------------------------------------------------------------------------------------------------------------------------------------------------------------------------------------------------------------------------------------------------------------------------------------------------------------------------------------------------------------------------------------------------------------------------------------------------------------------------------------------------------------------------------------------------------------------------------------------------------------------------------------------------------------------------------------------------------------------------------------------------------------------------------------------------------------------------------------------------------------------------------------------------------------------------------------------------------------------------------------------------------------------------------------------------------------------------------------------------------------------------------------------------------------------------------------------------------------------------------------------------------------------------------------------------------------------------------------------------------------------------------------------------------------------------------------------------------------------------------------------------------------------------------------------------------------------------------------------------------------------------------------------------------------------------------------------------------------------------------------------------------------------------------------------------------------------------------------------------------------------------------------------------------------------------------------------------------------------------------------------------------------------------------------------------------------------------------------------------------------------------------------------------------------------------------------------------------------------------------------------------------------------------------------------------------------------------------------------------------------------------------------------------------------------------------------------------------------------------------------------------------------------------------------------------------------------------------------------------------------------------------------------------------------------------------------------------------------------------------------------------------------------------------------------------------------------------------------------------------------------------------------------------------------------------------------------------------------------------------------------------------------------------------------------------------------------------------------------------------------------------------------------------------------------------------------------------------------------------------------------------------------------------------------------------------------------------------------------------------------------------------------------------------------------------------------------------------------------------------------------------------------------------------------------------------------------------------------------------------------------------------------------------------------------------------------------------------------------------------------------------------------------------------------------------------------------------------------------------------------------------------------------------------------------------------------------------------------------------------------------------------------------------------------------------------------------------------------------------------------------------------------------------------------------------------------------------------------------------------------------------------------------------------------------------------------------------------------------------------------------------------------------------------------------------------------------------------------------------------------------------------------------------------------------------------------------------------------------------------------------------------------------------------------------------------------------------------------------------------------------------------------------------------------------------|--------------------------------------------------------|--------------------------------------------------------------|-----------------------------------------------------------------------------------------------------------------------------------------------------------------------------------------------------------------------|
| EPI_ISL_1939244                                                                                                                                                                                                                                                                                                                                                                                                                                                                                                                                                                                                                                                                                                                                                                                                                                                                                                                                                                                                                                                                                                                                                                                                                                                                                                                                                                                                                                                                                                                                                                                                                                                                                                                                                                                                                                                                                                                                                                                                                                                                                                                                                                                                                                                                                                                                                                                                                                                                                                                                                                                                                                                                                                                                                                                                                                                                                                                                                                                                                                                                                                                                                                                                                                                                                                                                                                                                                                                                                                                                                                                                                                                                                                                                                                                                                                                                                                                                                                                                                                                                                                                                                                                                                                                                                                                                                                                                                                                                                                                                                                                                                                                                                                                                                                                                                                                                                                                                                                                                                                                                                                                                                                                                                                                                                                                                                                                                  | Spital Limmattal                                       | Institute of Medical Virology                                | Verena Kufner, Gabriela Ziltener, Maryam Zaheri, Stefan Schmutz, Annette Audigé, Maria Grünberg, Kevin Steiner, Jon Huder, Cyril Shah, Riccarda Capaul, Guido Bloembergen, Jürg Böni, Michael Huber, Alexandra Trkola |
| EPI_ISL_1939245, EPI_ISL_1939246, EPI_ISL_1939247, EPI_ISL_1939248, EPI_ISL_1939249, EPI_ISL_1939250, EPI_ISL_1939251, EPI_ISL_1939252, EPI_ISL_1939253, EPI_ISL_1939254, EPI_ISL_1939255, EPI_ISL_1939256, EPI_ISL_1939257, EPI_ISL_1939258, EPI_ISL_1939259, EPI_ISL_1939260, EPI_ISL_1939261, EPI_ISL_1939262, EPI_ISL_1939263, EPI_ISL_1939264, EPI_ISL_1939265, EPI_ISL_1939266, EPI_ISL_1939267, EPI_ISL_1939268, EPI_ISL_1939269, EPI_ISL_1939270, EPI_ISL_1939271, EPI_ISL_1939272, EPI_ISL_1939273, EPI_ISL_1939274, EPI_ISL_1939275, EPI_ISL_1939276, EPI_ISL_1939277, EPI_ISL_1939278, EPI_ISL_1939279, EPI_ISL_1939280, EPI_ISL_1939281, EPI_ISL_1939282, EPI_ISL_1939283, EPI_ISL_1939284                                                                                                                                                                                                                                                                                                                                                                                                                                                                                                                                                                                                                                                                                                                                                                                                                                                                                                                                                                                                                                                                                                                                                                                                                                                                                                                                                                                                                                                                                                                                                                                                                                                                                                                                                                                                                                                                                                                                                                                                                                                                                                                                                                                                                                                                                                                                                                                                                                                                                                                                                                                                                                                                                                                                                                                                                                                                                                                                                                                                                                                                                                                                                                                                                                                                                                                                                                                                                                                                                                                                                                                                                                                                                                                                                                                                                                                                                                                                                                                                                                                                                                                                                                                                                                                                                                                                                                                                                                                                                                                                                                                                                                                                                                           | Center for Laboratory Medicine                         | Center for Laboratory Medicine                               | Yannick Gerth                                                                                                                                                                                                         |
| see above                                                                                                                                                                                                                                                                                                                                                                                                                                                                                                                                                                                                                                                                                                                                                                                                                                                                                                                                                                                                                                                                                                                                                                                                                                                                                                                                                                                                                                                                                                                                                                                                                                                                                                                                                                                                                                                                                                                                                                                                                                                                                                                                                                                                                                                                                                                                                                                                                                                                                                                                                                                                                                                                                                                                                                                                                                                                                                                                                                                                                                                                                                                                                                                                                                                                                                                                                                                                                                                                                                                                                                                                                                                                                                                                                                                                                                                                                                                                                                                                                                                                                                                                                                                                                                                                                                                                                                                                                                                                                                                                                                                                                                                                                                                                                                                                                                                                                                                                                                                                                                                                                                                                                                                                                                                                                                                                                                                                        |                                                        |                                                              |                                                                                                                                                                                                                       |
| EPI_ISL_1941612, EPI_ISL_1941660, EPI_ISL_1941661, EPI_ISL_1941668, EPI_ISL_1941677, EPI_ISL_1941685, EPI_ISL_1941688, EPI_ISL_1941690, EPI_ISL_1941691, EPI_ISL_1941695, EPI_ISL_1941702, EPI_ISL_1941704, EPI_ISL_1941706, EPI_ISL_1941708, EPI_ISL_1941710                                                                                                                                                                                                                                                                                                                                                                                                                                                                                                                                                                                                                                                                                                                                                                                                                                                                                                                                                                                                                                                                                                                                                                                                                                                                                                                                                                                                                                                                                                                                                                                                                                                                                                                                                                                                                                                                                                                                                                                                                                                                                                                                                                                                                                                                                                                                                                                                                                                                                                                                                                                                                                                                                                                                                                                                                                                                                                                                                                                                                                                                                                                                                                                                                                                                                                                                                                                                                                                                                                                                                                                                                                                                                                                                                                                                                                                                                                                                                                                                                                                                                                                                                                                                                                                                                                                                                                                                                                                                                                                                                                                                                                                                                                                                                                                                                                                                                                                                                                                                                                                                                                                                                    |                                                        |                                                              |                                                                                                                                                                                                                       |
| see above                                                                                                                                                                                                                                                                                                                                                                                                                                                                                                                                                                                                                                                                                                                                                                                                                                                                                                                                                                                                                                                                                                                                                                                                                                                                                                                                                                                                                                                                                                                                                                                                                                                                                                                                                                                                                                                                                                                                                                                                                                                                                                                                                                                                                                                                                                                                                                                                                                                                                                                                                                                                                                                                                                                                                                                                                                                                                                                                                                                                                                                                                                                                                                                                                                                                                                                                                                                                                                                                                                                                                                                                                                                                                                                                                                                                                                                                                                                                                                                                                                                                                                                                                                                                                                                                                                                                                                                                                                                                                                                                                                                                                                                                                                                                                                                                                                                                                                                                                                                                                                                                                                                                                                                                                                                                                                                                                                                                        |                                                        |                                                              |                                                                                                                                                                                                                       |
| EPI_ISL_1941712                                                                                                                                                                                                                                                                                                                                                                                                                                                                                                                                                                                                                                                                                                                                                                                                                                                                                                                                                                                                                                                                                                                                                                                                                                                                                                                                                                                                                                                                                                                                                                                                                                                                                                                                                                                                                                                                                                                                                                                                                                                                                                                                                                                                                                                                                                                                                                                                                                                                                                                                                                                                                                                                                                                                                                                                                                                                                                                                                                                                                                                                                                                                                                                                                                                                                                                                                                                                                                                                                                                                                                                                                                                                                                                                                                                                                                                                                                                                                                                                                                                                                                                                                                                                                                                                                                                                                                                                                                                                                                                                                                                                                                                                                                                                                                                                                                                                                                                                                                                                                                                                                                                                                                                                                                                                                                                                                                                                  | CHUV                                                   | Laboratory of genomics and metagenomics                      | Trestan Pillonel, Damien Jacot, Sebastien Aeby, Gilbert Greub, Claire Bertelli                                                                                                                                        |
| EPI_ISL_1941715, EPI_ISL_1941719, EPI_ISL_1941723, EPI_ISL_1941727, EPI_ISL_1941731, EPI_ISL_1941734, EPI_ISL_1941736, EPI_ISL_1941738, EPI_ISL_1941739, EPI_ISL_1941742                                                                                                                                                                                                                                                                                                                                                                                                                                                                                                                                                                                                                                                                                                                                                                                                                                                                                                                                                                                                                                                                                                                                                                                                                                                                                                                                                                                                                                                                                                                                                                                                                                                                                                                                                                                                                                                                                                                                                                                                                                                                                                                                                                                                                                                                                                                                                                                                                                                                                                                                                                                                                                                                                                                                                                                                                                                                                                                                                                                                                                                                                                                                                                                                                                                                                                                                                                                                                                                                                                                                                                                                                                                                                                                                                                                                                                                                                                                                                                                                                                                                                                                                                                                                                                                                                                                                                                                                                                                                                                                                                                                                                                                                                                                                                                                                                                                                                                                                                                                                                                                                                                                                                                                                                                         | EHC MORGES                                             | Laboratory of genomics and metagenomics                      | Trestan Pillonel, Damien Jacot, Sebastien Aeby, Gilbert Greub, Claire Bertelli                                                                                                                                        |
|                                                                                                                                                                                                                                                                                                                                                                                                                                                                                                                                                                                                                                                                                                                                                                                                                                                                                                                                                                                                                                                                                                                                                                                                                                                                                                                                                                                                                                                                                                                                                                                                                                                                                                                                                                                                                                                                                                                                                                                                                                                                                                                                                                                                                                                                                                                                                                                                                                                                                                                                                                                                                                                                                                                                                                                                                                                                                                                                                                                                                                                                                                                                                                                                                                                                                                                                                                                                                                                                                                                                                                                                                                                                                                                                                                                                                                                                                                                                                                                                                                                                                                                                                                                                                                                                                                                                                                                                                                                                                                                                                                                                                                                                                                                                                                                                                                                                                                                                                                                                                                                                                                                                                                                                                                                                                                                                                                                                                  | CHUV                                                   | Laboratory of genomics and metagenomics                      | Trestan Pillonel, Damien Jacot, Sebastien Aeby, Gilbert Greub, Claire Bertelli                                                                                                                                        |
| EPI_ISL_1941744                                                                                                                                                                                                                                                                                                                                                                                                                                                                                                                                                                                                                                                                                                                                                                                                                                                                                                                                                                                                                                                                                                                                                                                                                                                                                                                                                                                                                                                                                                                                                                                                                                                                                                                                                                                                                                                                                                                                                                                                                                                                                                                                                                                                                                                                                                                                                                                                                                                                                                                                                                                                                                                                                                                                                                                                                                                                                                                                                                                                                                                                                                                                                                                                                                                                                                                                                                                                                                                                                                                                                                                                                                                                                                                                                                                                                                                                                                                                                                                                                                                                                                                                                                                                                                                                                                                                                                                                                                                                                                                                                                                                                                                                                                                                                                                                                                                                                                                                                                                                                                                                                                                                                                                                                                                                                                                                                                                                  | SYNLAB                                                 | Laboratory of genomics and metagenomics                      | Trestan Pillonel, Damien Jacot, Sebastien Aeby, Gilbert Greub, Claire Bertelli                                                                                                                                        |
| EPI_ISL_1941747, EPI_ISL_1941749, EPI_ISL_1941751, EPI_ISL_1941754                                                                                                                                                                                                                                                                                                                                                                                                                                                                                                                                                                                                                                                                                                                                                                                                                                                                                                                                                                                                                                                                                                                                                                                                                                                                                                                                                                                                                                                                                                                                                                                                                                                                                                                                                                                                                                                                                                                                                                                                                                                                                                                                                                                                                                                                                                                                                                                                                                                                                                                                                                                                                                                                                                                                                                                                                                                                                                                                                                                                                                                                                                                                                                                                                                                                                                                                                                                                                                                                                                                                                                                                                                                                                                                                                                                                                                                                                                                                                                                                                                                                                                                                                                                                                                                                                                                                                                                                                                                                                                                                                                                                                                                                                                                                                                                                                                                                                                                                                                                                                                                                                                                                                                                                                                                                                                                                               | CHUV                                                   | Laboratory of genomics and metagenomics                      | Trestan Pillonel, Damien Jacot, Sebastien Aeby, Gilbert Greub, Claire Bertelli                                                                                                                                        |
| EPI_ISL_1941761                                                                                                                                                                                                                                                                                                                                                                                                                                                                                                                                                                                                                                                                                                                                                                                                                                                                                                                                                                                                                                                                                                                                                                                                                                                                                                                                                                                                                                                                                                                                                                                                                                                                                                                                                                                                                                                                                                                                                                                                                                                                                                                                                                                                                                                                                                                                                                                                                                                                                                                                                                                                                                                                                                                                                                                                                                                                                                                                                                                                                                                                                                                                                                                                                                                                                                                                                                                                                                                                                                                                                                                                                                                                                                                                                                                                                                                                                                                                                                                                                                                                                                                                                                                                                                                                                                                                                                                                                                                                                                                                                                                                                                                                                                                                                                                                                                                                                                                                                                                                                                                                                                                                                                                                                                                                                                                                                                                                  | SYNLAB                                                 | Laboratory of genomics and metagenomics                      | Trestan Pillonel, Damien Jacot, Sebastien Aeby, Gilbert Greub, Claire Bertelli                                                                                                                                        |
| EPI_ISL_1941763                                                                                                                                                                                                                                                                                                                                                                                                                                                                                                                                                                                                                                                                                                                                                                                                                                                                                                                                                                                                                                                                                                                                                                                                                                                                                                                                                                                                                                                                                                                                                                                                                                                                                                                                                                                                                                                                                                                                                                                                                                                                                                                                                                                                                                                                                                                                                                                                                                                                                                                                                                                                                                                                                                                                                                                                                                                                                                                                                                                                                                                                                                                                                                                                                                                                                                                                                                                                                                                                                                                                                                                                                                                                                                                                                                                                                                                                                                                                                                                                                                                                                                                                                                                                                                                                                                                                                                                                                                                                                                                                                                                                                                                                                                                                                                                                                                                                                                                                                                                                                                                                                                                                                                                                                                                                                                                                                                                                  | ICH-RIVIERA                                            | Laboratory of genomics and metagenomics                      | Trestan Pillonel, Damien Jacot, Sebastien Aeby, Gilbert Greub, Claire Bertelli                                                                                                                                        |
| EPI_ISL_1941765, EPI_ISL_1941768, EPI_ISL_1941770                                                                                                                                                                                                                                                                                                                                                                                                                                                                                                                                                                                                                                                                                                                                                                                                                                                                                                                                                                                                                                                                                                                                                                                                                                                                                                                                                                                                                                                                                                                                                                                                                                                                                                                                                                                                                                                                                                                                                                                                                                                                                                                                                                                                                                                                                                                                                                                                                                                                                                                                                                                                                                                                                                                                                                                                                                                                                                                                                                                                                                                                                                                                                                                                                                                                                                                                                                                                                                                                                                                                                                                                                                                                                                                                                                                                                                                                                                                                                                                                                                                                                                                                                                                                                                                                                                                                                                                                                                                                                                                                                                                                                                                                                                                                                                                                                                                                                                                                                                                                                                                                                                                                                                                                                                                                                                                                                                | CHUV                                                   | Laboratory of genomics and metagenomics                      | Trestan Pillonel, Damien Jacot, Sebastien Aeby, Gilbert Greub, Claire Bertelli                                                                                                                                        |
| EPI_ISL_1941773                                                                                                                                                                                                                                                                                                                                                                                                                                                                                                                                                                                                                                                                                                                                                                                                                                                                                                                                                                                                                                                                                                                                                                                                                                                                                                                                                                                                                                                                                                                                                                                                                                                                                                                                                                                                                                                                                                                                                                                                                                                                                                                                                                                                                                                                                                                                                                                                                                                                                                                                                                                                                                                                                                                                                                                                                                                                                                                                                                                                                                                                                                                                                                                                                                                                                                                                                                                                                                                                                                                                                                                                                                                                                                                                                                                                                                                                                                                                                                                                                                                                                                                                                                                                                                                                                                                                                                                                                                                                                                                                                                                                                                                                                                                                                                                                                                                                                                                                                                                                                                                                                                                                                                                                                                                                                                                                                                                                  | LA SOURCE                                              | Laboratory of genomics and metagenomics                      | Trestan Pillonel, Damien Jacot, Sebastien Aeby, Gilbert Greub, Claire Bertelli                                                                                                                                        |
| EPI_ISL_1941776                                                                                                                                                                                                                                                                                                                                                                                                                                                                                                                                                                                                                                                                                                                                                                                                                                                                                                                                                                                                                                                                                                                                                                                                                                                                                                                                                                                                                                                                                                                                                                                                                                                                                                                                                                                                                                                                                                                                                                                                                                                                                                                                                                                                                                                                                                                                                                                                                                                                                                                                                                                                                                                                                                                                                                                                                                                                                                                                                                                                                                                                                                                                                                                                                                                                                                                                                                                                                                                                                                                                                                                                                                                                                                                                                                                                                                                                                                                                                                                                                                                                                                                                                                                                                                                                                                                                                                                                                                                                                                                                                                                                                                                                                                                                                                                                                                                                                                                                                                                                                                                                                                                                                                                                                                                                                                                                                                                                  | CHUV                                                   | Laboratory of genomics and metagenomics                      | Trestan Pillonel, Damien Jacot, Sebastien Aeby, Gilbert Greub, Claire Bertelli                                                                                                                                        |
| EPI_ISL_1941778                                                                                                                                                                                                                                                                                                                                                                                                                                                                                                                                                                                                                                                                                                                                                                                                                                                                                                                                                                                                                                                                                                                                                                                                                                                                                                                                                                                                                                                                                                                                                                                                                                                                                                                                                                                                                                                                                                                                                                                                                                                                                                                                                                                                                                                                                                                                                                                                                                                                                                                                                                                                                                                                                                                                                                                                                                                                                                                                                                                                                                                                                                                                                                                                                                                                                                                                                                                                                                                                                                                                                                                                                                                                                                                                                                                                                                                                                                                                                                                                                                                                                                                                                                                                                                                                                                                                                                                                                                                                                                                                                                                                                                                                                                                                                                                                                                                                                                                                                                                                                                                                                                                                                                                                                                                                                                                                                                                                  | EHC MORGES                                             | Laboratory of genomics and metagenomics                      | Trestan Pillonel, Damien Jacot, Sebastien Aeby, Gilbert Greub, Claire Bertelli                                                                                                                                        |
| EPI_ISL_1941779, EPI_ISL_1941782, EPI_ISL_1941787, EPI_ISL_1941790, EPI_ISL_1941792, EPI_ISL_1941793, EPI_ISL_1941796, EPI_ISL_1941798, EPI_ISL_1941800, EPI_ISL_1941801, EPI_ISL_1941804, EPI_ISL_1941805                                                                                                                                                                                                                                                                                                                                                                                                                                                                                                                                                                                                                                                                                                                                                                                                                                                                                                                                                                                                                                                                                                                                                                                                                                                                                                                                                                                                                                                                                                                                                                                                                                                                                                                                                                                                                                                                                                                                                                                                                                                                                                                                                                                                                                                                                                                                                                                                                                                                                                                                                                                                                                                                                                                                                                                                                                                                                                                                                                                                                                                                                                                                                                                                                                                                                                                                                                                                                                                                                                                                                                                                                                                                                                                                                                                                                                                                                                                                                                                                                                                                                                                                                                                                                                                                                                                                                                                                                                                                                                                                                                                                                                                                                                                                                                                                                                                                                                                                                                                                                                                                                                                                                                                                       |                                                        |                                                              |                                                                                                                                                                                                                       |
| see above                                                                                                                                                                                                                                                                                                                                                                                                                                                                                                                                                                                                                                                                                                                                                                                                                                                                                                                                                                                                                                                                                                                                                                                                                                                                                                                                                                                                                                                                                                                                                                                                                                                                                                                                                                                                                                                                                                                                                                                                                                                                                                                                                                                                                                                                                                                                                                                                                                                                                                                                                                                                                                                                                                                                                                                                                                                                                                                                                                                                                                                                                                                                                                                                                                                                                                                                                                                                                                                                                                                                                                                                                                                                                                                                                                                                                                                                                                                                                                                                                                                                                                                                                                                                                                                                                                                                                                                                                                                                                                                                                                                                                                                                                                                                                                                                                                                                                                                                                                                                                                                                                                                                                                                                                                                                                                                                                                                                        |                                                        |                                                              |                                                                                                                                                                                                                       |
| EPI_ISL_1941809                                                                                                                                                                                                                                                                                                                                                                                                                                                                                                                                                                                                                                                                                                                                                                                                                                                                                                                                                                                                                                                                                                                                                                                                                                                                                                                                                                                                                                                                                                                                                                                                                                                                                                                                                                                                                                                                                                                                                                                                                                                                                                                                                                                                                                                                                                                                                                                                                                                                                                                                                                                                                                                                                                                                                                                                                                                                                                                                                                                                                                                                                                                                                                                                                                                                                                                                                                                                                                                                                                                                                                                                                                                                                                                                                                                                                                                                                                                                                                                                                                                                                                                                                                                                                                                                                                                                                                                                                                                                                                                                                                                                                                                                                                                                                                                                                                                                                                                                                                                                                                                                                                                                                                                                                                                                                                                                                                                                  | CHUV                                                   | Laboratory of genomics and metagenomics                      | Trestan Pillonel, Damien Jacot, Sebastien Aeby, Gilbert Greub, Claire Bertelli                                                                                                                                        |
| EPI_ISL_1941812, EPI_ISL_1941813, EPI_ISL_1941816, EPI_ISL_1941818, EPI_ISL_1941820, EPI_ISL_1941821                                                                                                                                                                                                                                                                                                                                                                                                                                                                                                                                                                                                                                                                                                                                                                                                                                                                                                                                                                                                                                                                                                                                                                                                                                                                                                                                                                                                                                                                                                                                                                                                                                                                                                                                                                                                                                                                                                                                                                                                                                                                                                                                                                                                                                                                                                                                                                                                                                                                                                                                                                                                                                                                                                                                                                                                                                                                                                                                                                                                                                                                                                                                                                                                                                                                                                                                                                                                                                                                                                                                                                                                                                                                                                                                                                                                                                                                                                                                                                                                                                                                                                                                                                                                                                                                                                                                                                                                                                                                                                                                                                                                                                                                                                                                                                                                                                                                                                                                                                                                                                                                                                                                                                                                                                                                                                             | EHNH                                                   | Laboratory of genomics and metagenomics                      | Trestan Pillonel, Damien Jacot, Sebastien Aeby, Gilbert Greub, Claire Bertelli                                                                                                                                        |
|                                                                                                                                                                                                                                                                                                                                                                                                                                                                                                                                                                                                                                                                                                                                                                                                                                                                                                                                                                                                                                                                                                                                                                                                                                                                                                                                                                                                                                                                                                                                                                                                                                                                                                                                                                                                                                                                                                                                                                                                                                                                                                                                                                                                                                                                                                                                                                                                                                                                                                                                                                                                                                                                                                                                                                                                                                                                                                                                                                                                                                                                                                                                                                                                                                                                                                                                                                                                                                                                                                                                                                                                                                                                                                                                                                                                                                                                                                                                                                                                                                                                                                                                                                                                                                                                                                                                                                                                                                                                                                                                                                                                                                                                                                                                                                                                                                                                                                                                                                                                                                                                                                                                                                                                                                                                                                                                                                                                                  | CHUV                                                   | Laboratory of genomics and metagenomics                      | Trestan Pillonel, Damien Jacot, Sebastien Aeby, Gilbert Greub, Claire Bertelli                                                                                                                                        |
| EPI_ISL_1941824                                                                                                                                                                                                                                                                                                                                                                                                                                                                                                                                                                                                                                                                                                                                                                                                                                                                                                                                                                                                                                                                                                                                                                                                                                                                                                                                                                                                                                                                                                                                                                                                                                                                                                                                                                                                                                                                                                                                                                                                                                                                                                                                                                                                                                                                                                                                                                                                                                                                                                                                                                                                                                                                                                                                                                                                                                                                                                                                                                                                                                                                                                                                                                                                                                                                                                                                                                                                                                                                                                                                                                                                                                                                                                                                                                                                                                                                                                                                                                                                                                                                                                                                                                                                                                                                                                                                                                                                                                                                                                                                                                                                                                                                                                                                                                                                                                                                                                                                                                                                                                                                                                                                                                                                                                                                                                                                                                                                  | EHC MORGES                                             | Laboratory of genomics and metagenomics                      | Trestan Pillonel, Damien Jacot, Sebastien Aeby, Gilbert Greub, Claire Bertelli                                                                                                                                        |
| EPI_ISL_1941825                                                                                                                                                                                                                                                                                                                                                                                                                                                                                                                                                                                                                                                                                                                                                                                                                                                                                                                                                                                                                                                                                                                                                                                                                                                                                                                                                                                                                                                                                                                                                                                                                                                                                                                                                                                                                                                                                                                                                                                                                                                                                                                                                                                                                                                                                                                                                                                                                                                                                                                                                                                                                                                                                                                                                                                                                                                                                                                                                                                                                                                                                                                                                                                                                                                                                                                                                                                                                                                                                                                                                                                                                                                                                                                                                                                                                                                                                                                                                                                                                                                                                                                                                                                                                                                                                                                                                                                                                                                                                                                                                                                                                                                                                                                                                                                                                                                                                                                                                                                                                                                                                                                                                                                                                                                                                                                                                                                                  | SYNLAB                                                 | Laboratory of genomics and metagenomics                      | Trestan Pillonel, Damien Jacot, Sebastien Aeby, Gilbert Greub, Claire Bertelli                                                                                                                                        |
| EPI_ISL_1941828, EPI_ISL_1941829, EPI_ISL_1941831                                                                                                                                                                                                                                                                                                                                                                                                                                                                                                                                                                                                                                                                                                                                                                                                                                                                                                                                                                                                                                                                                                                                                                                                                                                                                                                                                                                                                                                                                                                                                                                                                                                                                                                                                                                                                                                                                                                                                                                                                                                                                                                                                                                                                                                                                                                                                                                                                                                                                                                                                                                                                                                                                                                                                                                                                                                                                                                                                                                                                                                                                                                                                                                                                                                                                                                                                                                                                                                                                                                                                                                                                                                                                                                                                                                                                                                                                                                                                                                                                                                                                                                                                                                                                                                                                                                                                                                                                                                                                                                                                                                                                                                                                                                                                                                                                                                                                                                                                                                                                                                                                                                                                                                                                                                                                                                                                                | CHUV                                                   | Laboratory of genomics and metagenomics                      | Trestan Pillonel, Damien Jacot, Sebastien Aeby, Gilbert Greub, Claire Bertelli                                                                                                                                        |
| EPI_ISL_1941834                                                                                                                                                                                                                                                                                                                                                                                                                                                                                                                                                                                                                                                                                                                                                                                                                                                                                                                                                                                                                                                                                                                                                                                                                                                                                                                                                                                                                                                                                                                                                                                                                                                                                                                                                                                                                                                                                                                                                                                                                                                                                                                                                                                                                                                                                                                                                                                                                                                                                                                                                                                                                                                                                                                                                                                                                                                                                                                                                                                                                                                                                                                                                                                                                                                                                                                                                                                                                                                                                                                                                                                                                                                                                                                                                                                                                                                                                                                                                                                                                                                                                                                                                                                                                                                                                                                                                                                                                                                                                                                                                                                                                                                                                                                                                                                                                                                                                                                                                                                                                                                                                                                                                                                                                                                                                                                                                                                                  | HIB                                                    | Laboratory of genomics and metagenomics                      | Trestan Pillonel, Damien Jacot, Sebastien Aeby, Gilbert Greub, Claire Bertelli                                                                                                                                        |
| EPI_ISL_1941836, EPI_ISL_1941837, EPI_ISL_1941840                                                                                                                                                                                                                                                                                                                                                                                                                                                                                                                                                                                                                                                                                                                                                                                                                                                                                                                                                                                                                                                                                                                                                                                                                                                                                                                                                                                                                                                                                                                                                                                                                                                                                                                                                                                                                                                                                                                                                                                                                                                                                                                                                                                                                                                                                                                                                                                                                                                                                                                                                                                                                                                                                                                                                                                                                                                                                                                                                                                                                                                                                                                                                                                                                                                                                                                                                                                                                                                                                                                                                                                                                                                                                                                                                                                                                                                                                                                                                                                                                                                                                                                                                                                                                                                                                                                                                                                                                                                                                                                                                                                                                                                                                                                                                                                                                                                                                                                                                                                                                                                                                                                                                                                                                                                                                                                                                                | CHUV                                                   | Laboratory of genomics and metagenomics                      | Trestan Pillonel, Damien Jacot, Sebastien Aeby, Gilbert Greub, Claire Bertelli                                                                                                                                        |
| EPI_ISL_1941841, EPI_ISL_1941844                                                                                                                                                                                                                                                                                                                                                                                                                                                                                                                                                                                                                                                                                                                                                                                                                                                                                                                                                                                                                                                                                                                                                                                                                                                                                                                                                                                                                                                                                                                                                                                                                                                                                                                                                                                                                                                                                                                                                                                                                                                                                                                                                                                                                                                                                                                                                                                                                                                                                                                                                                                                                                                                                                                                                                                                                                                                                                                                                                                                                                                                                                                                                                                                                                                                                                                                                                                                                                                                                                                                                                                                                                                                                                                                                                                                                                                                                                                                                                                                                                                                                                                                                                                                                                                                                                                                                                                                                                                                                                                                                                                                                                                                                                                                                                                                                                                                                                                                                                                                                                                                                                                                                                                                                                                                                                                                                                                 | EHNH                                                   | Laboratory of genomics and metagenomics                      | Trestan Pillonel, Damien Jacot, Sebastien Aeby, Gilbert Greub, Claire Bertelli                                                                                                                                        |
| EPI_ISL_1941845                                                                                                                                                                                                                                                                                                                                                                                                                                                                                                                                                                                                                                                                                                                                                                                                                                                                                                                                                                                                                                                                                                                                                                                                                                                                                                                                                                                                                                                                                                                                                                                                                                                                                                                                                                                                                                                                                                                                                                                                                                                                                                                                                                                                                                                                                                                                                                                                                                                                                                                                                                                                                                                                                                                                                                                                                                                                                                                                                                                                                                                                                                                                                                                                                                                                                                                                                                                                                                                                                                                                                                                                                                                                                                                                                                                                                                                                                                                                                                                                                                                                                                                                                                                                                                                                                                                                                                                                                                                                                                                                                                                                                                                                                                                                                                                                                                                                                                                                                                                                                                                                                                                                                                                                                                                                                                                                                                                                  | CHUV                                                   | Laboratory of genomics and metagenomics                      | Trestan Pillonel, Damien Jacot, Sebastien Aeby, Gilbert Greub, Claire Bertelli                                                                                                                                        |
| EPI_ISL_1941847                                                                                                                                                                                                                                                                                                                                                                                                                                                                                                                                                                                                                                                                                                                                                                                                                                                                                                                                                                                                                                                                                                                                                                                                                                                                                                                                                                                                                                                                                                                                                                                                                                                                                                                                                                                                                                                                                                                                                                                                                                                                                                                                                                                                                                                                                                                                                                                                                                                                                                                                                                                                                                                                                                                                                                                                                                                                                                                                                                                                                                                                                                                                                                                                                                                                                                                                                                                                                                                                                                                                                                                                                                                                                                                                                                                                                                                                                                                                                                                                                                                                                                                                                                                                                                                                                                                                                                                                                                                                                                                                                                                                                                                                                                                                                                                                                                                                                                                                                                                                                                                                                                                                                                                                                                                                                                                                                                                                  | EHC MORGES                                             | Laboratory of genomics and metagenomics                      | Trestan Pillonel, Damien Jacot, Sebastien Aeby, Gilbert Greub, Claire Bertelli                                                                                                                                        |
| EPI_ISL_1941850                                                                                                                                                                                                                                                                                                                                                                                                                                                                                                                                                                                                                                                                                                                                                                                                                                                                                                                                                                                                                                                                                                                                                                                                                                                                                                                                                                                                                                                                                                                                                                                                                                                                                                                                                                                                                                                                                                                                                                                                                                                                                                                                                                                                                                                                                                                                                                                                                                                                                                                                                                                                                                                                                                                                                                                                                                                                                                                                                                                                                                                                                                                                                                                                                                                                                                                                                                                                                                                                                                                                                                                                                                                                                                                                                                                                                                                                                                                                                                                                                                                                                                                                                                                                                                                                                                                                                                                                                                                                                                                                                                                                                                                                                                                                                                                                                                                                                                                                                                                                                                                                                                                                                                                                                                                                                                                                                                                                  | CHUV                                                   | Laboratory of genomics and metagenomics                      | Trestan Pillonel, Damien Jacot, Sebastien Aeby, Gilbert Greub, Claire Bertelli                                                                                                                                        |
| EPI_ISL_1941921                                                                                                                                                                                                                                                                                                                                                                                                                                                                                                                                                                                                                                                                                                                                                                                                                                                                                                                                                                                                                                                                                                                                                                                                                                                                                                                                                                                                                                                                                                                                                                                                                                                                                                                                                                                                                                                                                                                                                                                                                                                                                                                                                                                                                                                                                                                                                                                                                                                                                                                                                                                                                                                                                                                                                                                                                                                                                                                                                                                                                                                                                                                                                                                                                                                                                                                                                                                                                                                                                                                                                                                                                                                                                                                                                                                                                                                                                                                                                                                                                                                                                                                                                                                                                                                                                                                                                                                                                                                                                                                                                                                                                                                                                                                                                                                                                                                                                                                                                                                                                                                                                                                                                                                                                                                                                                                                                                                                  | VIDYMED LAUSANNE                                       | Laboratory of genomics and metagenomics                      | Trestan Pillonel, Damien Jacot, Sebastien Aeby, Gilbert Greub, Claire Bertelli                                                                                                                                        |
| EPI_ISL_1963012, EPI_ISL_1963013, EPI_ISL_1963014, EPI_ISL_1963015, EPI_ISL_1963016, EPI_ISL_1963017, EPI_ISL_1963018, EPI_ISL_1963019, EPI_ISL_1963020, EPI_ISL_1963021, EPI_ISL_1963022, EPI_ISL_1963023, EPI_ISL_1963024, EPI_ISL_1963025, EPI_ISL_1963026, EPI_ISL_1963027, EPI_ISL_1963028, EPI_ISL_1963029, EPI_ISL_1963030, EPI_ISL_1963031, EPI_ISL_1963032, EPI_ISL_1963033, EPI_ISL_1963034, EPI_ISL_1963035, EPI_ISL_1963036, EPI_ISL_1963037, EPI_ISL_1963038, EPI_ISL_1963039, EPI_ISL_1963040, EPI_ISL_1963041, EPI_ISL_1963042, EPI_ISL_1963043, EPI_ISL_1963044, EPI_ISL_1963045, EPI_ISL_1963046, EPI_ISL_1963047, EPI_ISL_1963048, EPI_ISL_1963049, EPI_ISL_1963050, EPI_ISL_1963051, EPI_ISL_1963052, EPI_ISL_1963053, EPI_ISL_1963054, EPI_ISL_1963055, EPI_ISL_1963056, EPI_ISL_1963057, EPI_ISL_1963058, EPI_ISL_1963059, EPI_ISL_1963060, EPI_ISL_1963061, EPI_ISL_1963062, EPI_ISL_1963063, EPI_ISL_1963064, EPI_ISL_1963065, EPI_ISL_1963066, EPI_ISL_1963067, EPI_ISL_1963068, EPI_ISL_1963069, EPI_ISL_1963070, EPI_ISL_1963071, EPI_ISL_1963072, EPI_ISL_1963073, EPI_ISL_1963074, EPI_ISL_1963075, EPI_ISL_1963076, EPI_ISL_1963077, EPI_ISL_1963078, EPI_ISL_1963079, EPI_ISL_1963080, EPI_ISL_1963081, EPI_ISL_1963082, EPI_ISL_1963083, EPI_ISL_1963084, EPI_ISL_1963085, EPI_ISL_1963086, EPI_ISL_1963087, EPI_ISL_1963088, EPI_ISL_1963089, EPI_ISL_1963090, EPI_ISL_1963091, EPI_ISL_1963092, EPI_ISL_1963093, EPI_ISL_1963094, EPI_ISL_1963095, EPI_ISL_1963096, EPI_ISL_1963097, EPI_ISL_1963098, EPI_ISL_1963099, EPI_ISL_1963100, EPI_ISL_1963101, EPI_ISL_1963102, EPI_ISL_1963103, EPI_ISL_1963104, EPI_ISL_1963105, EPI_ISL_1963106, EPI_ISL_1963107, EPI_ISL_1963108, EPI_ISL_1963109, EPI_ISL_1963110, EPI_ISL_1963111, EPI_ISL_1963112, EPI_ISL_1963113, EPI_ISL_1963114, EPI_ISL_1963115, EPI_ISL_1963116, EPI_ISL_1963117, EPI_ISL_1963118, EPI_ISL_1963119, EPI_ISL_1963120, EPI_ISL_1963121, EPI_ISL_1963122, EPI_ISL_1963123, EPI_ISL_1963124, EPI_ISL_1963125, EPI_ISL_1963126, EPI_ISL_1963127, EPI_ISL_1963128, EPI_ISL_1963129, EPI_ISL_1963130, EPI_ISL_1963131, EPI_ISL_1963132, EPI_ISL_1963133, EPI_ISL_1963134, EPI_ISL_1963135, EPI_ISL_1963136, EPI_ISL_1963137, EPI_ISL_1963138, EPI_ISL_1963139, EPI_ISL_1963140, EPI_ISL_1963141, EPI_ISL_1963142, EPI_ISL_1963143, EPI_ISL_1963144, EPI_ISL_1963145, EPI_ISL_1963146, EPI_ISL_1963147, EPI_ISL_1963148, EPI_ISL_1963149, EPI_ISL_1963150, EPI_ISL_1963151, EPI_ISL_1963152, EPI_ISL_1963153, EPI_ISL_1963154, EPI_ISL_1963155, EPI_ISL_1963156, EPI_ISL_1963157, EPI_ISL_1963158, EPI_ISL_1963159, EPI_ISL_1963160, EPI_ISL_1963161, EPI_ISL_1963162, EPI_ISL_1963163, EPI_ISL_1963164, EPI_ISL_1963165, EPI_ISL_1963166, EPI_ISL_1963167, EPI_ISL_1963168, EPI_ISL_1963169, EPI_ISL_1963170, EPI_ISL_1963171, EPI_ISL_1963172, EPI_ISL_1963173, EPI_ISL_1963174, EPI_ISL_1963175, EPI_ISL_1963176, EPI_ISL_1963177, EPI_ISL_1963178, EPI_ISL_1963179, EPI_ISL_1963180, EPI_ISL_1963181, EPI_ISL_1963182, EPI_ISL_1963183, EPI_ISL_1963184, EPI_ISL_1963185, EPI_ISL_1963186, EPI_ISL_1963187, EPI_ISL_1963188, EPI_ISL_1963189, EPI_ISL_1963190, EPI_ISL_1963191, EPI_ISL_1963192, EPI_ISL_1963193, EPI_ISL_1963194, EPI_ISL_1963195, EPI_ISL_1963196, EPI_ISL_1963197, EPI_ISL_1963198, EPI_ISL_1963199, EPI_ISL_1963200, EPI_ISL_1963201, EPI_ISL_1963202, EPI_ISL_1963203, EPI_ISL_1963204, EPI_ISL_1963205, EPI_ISL_1963206, EPI_ISL_1963207, EPI_ISL_1963208, EPI_ISL_1963209, EPI_ISL_1963210, EPI_ISL_1963211, EPI_ISL_1963212, EPI_ISL_1963213, EPI_ISL_1963214, EPI_ISL_1963215, EPI_ISL_1963216, EPI_ISL_1963217, EPI_ISL_1963218, EPI_ISL_1963219, EPI_ISL_1963220, EPI_ISL_1963221, EPI_ISL_1963222, EPI_ISL_1963223, EPI_ISL_1963224, EPI_ISL_1963225, EPI_ISL_1963226, EPI_ISL_1963227, EPI_ISL_1963228, EPI_ISL_1963229, EPI_ISL_1963230, EPI_ISL_1963231, EPI_ISL_1963232, EPI_ISL_1963233, EPI_ISL_1963234, EPI_ISL_1963235, EPI_ISL_1963236, EPI_ISL_1963237, EPI_ISL_1963238, EPI_ISL_1963239, EPI_ISL_1963240, EPI_ISL_1963241, EPI_ISL_1963242, EPI_ISL_1963243, EPI_ISL_1963244, EPI_ISL_1963245, EPI_ISL_1963246, EPI_ISL_1963247, EPI_ISL_1963248, EPI_ISL_1963249, EPI_ISL_1963250, EPI_ISL_1963251, EPI_ISL_1963252, EPI_ISL_1963253, EPI_ISL_1963254, EPI_ISL_1963255, EPI_ISL_1963256, EPI_ISL_1963257, EPI_ISL_1963258, EPI_ISL_1963259, EPI_ISL_1963260, EPI_ISL_1963261, EPI_ISL_1963262, EPI_ISL_1963263, EPI_ISL_1963264, EPI_ISL_1963265, EPI_ISL_1963266, EPI_ISL_1963267, EPI_ISL_1963268, EPI_ISL_1963269, EPI_ISL_1963270, EPI_ISL_1963271, EPI_ISL_1963272, EPI_ISL_1963273, EPI_ISL_1963274, EPI_ISL_1963275, EPI_ISL_1963276, EPI_ISL_1963277, EPI_ISL_1963278, EPI_ISL_1963279, EPI_ISL_1963280, EPI_ISL_1963281, EPI_ISL_1963282, EPI_ISL_1963283, EPI_ISL_1963284, EPI_ISL_1963285, EPI_ISL_1963286, EPI_ISL_1963287, EPI_ISL_1963288, EPI_ISL_1963289, EPI_ISL_1963290, EPI_ISL_1963291, EPI_ISL_1963292, EPI_ISL_1963293, EPI_ISL_1963294, EPI_ISL_1963295, EPI_ISL_1963296, EPI_ISL_1963297, EPI_ISL_1963298, EPI_ISL_1963299, EPI_ISL_1963300, EPI_ISL_1963301, EPI_ISL_1963302, EPI_ISL_1963303, EPI_ISL_1963304, EPI_ISL_1963305, EPI_ISL_1963306, EPI_ISL_1963307, EPI_ISL_1963308, EPI_ISL_1963309, EPI_ISL_1963310, EPI_ISL_1963311, EPI_ISL_1963312, EPI_ISL_1963313, EPI_ISL_1963314, EPI_ISL_1963315, EPI_ISL_1963316, EPI_ISL_1963317 |                                                        |                                                              |                                                                                                                                                                                                                       |
| see above                                                                                                                                                                                                                                                                                                                                                                                                                                                                                                                                                                                                                                                                                                                                                                                                                                                                                                                                                                                                                                                                                                                                                                                                                                                                                                                                                                                                                                                                                                                                                                                                                                                                                                                                                                                                                                                                                                                                                                                                                                                                                                                                                                                                                                                                                                                                                                                                                                                                                                                                                                                                                                                                                                                                                                                                                                                                                                                                                                                                                                                                                                                                                                                                                                                                                                                                                                                                                                                                                                                                                                                                                                                                                                                                                                                                                                                                                                                                                                                                                                                                                                                                                                                                                                                                                                                                                                                                                                                                                                                                                                                                                                                                                                                                                                                                                                                                                                                                                                                                                                                                                                                                                                                                                                                                                                                                                                                                        |                                                        |                                                              |                                                                                                                                                                                                                       |
| EPI_ISL_1973557, EPI_ISL_1973558, EPI_ISL_1973559, EPI_ISL_1973560, EPI_ISL_1973561, EPI_ISL_1973562, EPI_ISL_1973563, EPI_ISL_1973564, EPI_ISL_1973565, EPI_ISL_1973566                                                                                                                                                                                                                                                                                                                                                                                                                                                                                                                                                                                                                                                                                                                                                                                                                                                                                                                                                                                                                                                                                                                                                                                                                                                                                                                                                                                                                                                                                                                                                                                                                                                                                                                                                                                                                                                                                                                                                                                                                                                                                                                                                                                                                                                                                                                                                                                                                                                                                                                                                                                                                                                                                                                                                                                                                                                                                                                                                                                                                                                                                                                                                                                                                                                                                                                                                                                                                                                                                                                                                                                                                                                                                                                                                                                                                                                                                                                                                                                                                                                                                                                                                                                                                                                                                                                                                                                                                                                                                                                                                                                                                                                                                                                                                                                                                                                                                                                                                                                                                                                                                                                                                                                                                                         | University Hospitals of Geneva, Laboratory of Virology | HUG, Laboratory of Virology and the Health2030 Genome Center | Samuel Cordey, Ana Rita Goncalves, Laurent Kaiser, Lorenzo Cerutti, Henri Pegegot, Melyssa Elies, Deborah Penet, Keith Harshman, Ioannis Xenarios, Emmanouil Dermatzakis                                              |
| EPI_ISL_1973567                                                                                                                                                                                                                                                                                                                                                                                                                                                                                                                                                                                                                                                                                                                                                                                                                                                                                                                                                                                                                                                                                                                                                                                                                                                                                                                                                                                                                                                                                                                                                                                                                                                                                                                                                                                                                                                                                                                                                                                                                                                                                                                                                                                                                                                                                                                                                                                                                                                                                                                                                                                                                                                                                                                                                                                                                                                                                                                                                                                                                                                                                                                                                                                                                                                                                                                                                                                                                                                                                                                                                                                                                                                                                                                                                                                                                                                                                                                                                                                                                                                                                                                                                                                                                                                                                                                                                                                                                                                                                                                                                                                                                                                                                                                                                                                                                                                                                                                                                                                                                                                                                                                                                                                                                                                                                                                                                                                                  | Clinical Virology                                      | Clinical Bacteriology                                        | Tim Roloff, Madlen Stange, Helena MB Seth-Smith, Alfredo Mari, Karoline Leuzinger, Julia Bielicki, Manuel Battegay, Hans Hirsch, Adrian Egli                                                                          |
| EPI_ISL_1973568, EPI_ISL_1973569                                                                                                                                                                                                                                                                                                                                                                                                                                                                                                                                                                                                                                                                                                                                                                                                                                                                                                                                                                                                                                                                                                                                                                                                                                                                                                                                                                                                                                                                                                                                                                                                                                                                                                                                                                                                                                                                                                                                                                                                                                                                                                                                                                                                                                                                                                                                                                                                                                                                                                                                                                                                                                                                                                                                                                                                                                                                                                                                                                                                                                                                                                                                                                                                                                                                                                                                                                                                                                                                                                                                                                                                                                                                                                                                                                                                                                                                                                                                                                                                                                                                                                                                                                                                                                                                                                                                                                                                                                                                                                                                                                                                                                                                                                                                                                                                                                                                                                                                                                                                                                                                                                                                                                                                                                                                                                                                                                                 | Synlab Suisse SA                                       | Clinical Bacteriology                                        | Tim Roloff, Madlen Stange, Helena MB Seth-Smith, Alfredo Mari, Karoline Leuzinger, Julia Bielicki, Manuel Battegay, Hans Hirsch, Adrian Egli                                                                          |
| EPI_ISL_1973570                                                                                                                                                                                                                                                                                                                                                                                                                                                                                                                                                                                                                                                                                                                                                                                                                                                                                                                                                                                                                                                                                                                                                                                                                                                                                                                                                                                                                                                                                                                                                                                                                                                                                                                                                                                                                                                                                                                                                                                                                                                                                                                                                                                                                                                                                                                                                                                                                                                                                                                                                                                                                                                                                                                                                                                                                                                                                                                                                                                                                                                                                                                                                                                                                                                                                                                                                                                                                                                                                                                                                                                                                                                                                                                                                                                                                                                                                                                                                                                                                                                                                                                                                                                                                                                                                                                                                                                                                                                                                                                                                                                                                                                                                                                                                                                                                                                                                                                                                                                                                                                                                                                                                                                                                                                                                                                                                                                                  | Clinical Virology                                      | Clinical Bacteriology                                        | Tim Roloff, Madlen Stange, Helena MB Seth-Smith, Alfredo Mari, Karoline Leuzinger, Julia Bielicki, Nadia Wohlwend, Martin Risch, Lorenz Risch, Manuel Battegay, Hans Hirsch, Adrian Egli                              |
|                                                                                                                                                                                                                                                                                                                                                                                                                                                                                                                                                                                                                                                                                                                                                                                                                                                                                                                                                                                                                                                                                                                                                                                                                                                                                                                                                                                                                                                                                                                                                                                                                                                                                                                                                                                                                                                                                                                                                                                                                                                                                                                                                                                                                                                                                                                                                                                                                                                                                                                                                                                                                                                                                                                                                                                                                                                                                                                                                                                                                                                                                                                                                                                                                                                                                                                                                                                                                                                                                                                                                                                                                                                                                                                                                                                                                                                                                                                                                                                                                                                                                                                                                                                                                                                                                                                                                                                                                                                                                                                                                                                                                                                                                                                                                                                                                                                                                                                                                                                                                                                                                                                                                                                                                                                                                                                                                                                                                  | Labormedizinisches Zentrum Dr Risch                    | Clinical Bacteriology                                        | Tim Roloff, Madlen Stange, Helena MB Seth-Smith, Alfredo Mari, Karoline Leuzinger, Julia Bielicki, Nadia Wohlwend, Martin Risch, Lorenz Risch, Manuel Battegay, Hans Hirsch, Adrian Egli                              |

|                                                                                                                                                                                                                                                                                                                                                                                                                                                                                                                                                                                                                                                                                                                                                                                                                                                                                                                                                                                                                                                                                                                                                                                   |                                     |                               |                                                                                                                                                                                                                                                                                                             |
|-----------------------------------------------------------------------------------------------------------------------------------------------------------------------------------------------------------------------------------------------------------------------------------------------------------------------------------------------------------------------------------------------------------------------------------------------------------------------------------------------------------------------------------------------------------------------------------------------------------------------------------------------------------------------------------------------------------------------------------------------------------------------------------------------------------------------------------------------------------------------------------------------------------------------------------------------------------------------------------------------------------------------------------------------------------------------------------------------------------------------------------------------------------------------------------|-------------------------------------|-------------------------------|-------------------------------------------------------------------------------------------------------------------------------------------------------------------------------------------------------------------------------------------------------------------------------------------------------------|
| EPI_ISL_1993680, EPI_ISL_1993681, EPI_ISL_1993682, EPI_ISL_1993683, EPI_ISL_1993684, EPI_ISL_1993685, EPI_ISL_1993691, EPI_ISL_1993694, EPI_ISL_1993700, EPI_ISL_1993707, EPI_ISL_1993713, EPI_ISL_1993716, EPI_ISL_1993719, EPI_ISL_1993724, EPI_ISL_1993731, EPI_ISL_1993732, EPI_ISL_1993733, EPI_ISL_1993734, EPI_ISL_1993735, EPI_ISL_1993736, EPI_ISL_1993737, EPI_ISL_1993738, EPI_ISL_1993739, EPI_ISL_1993740, EPI_ISL_1993741, EPI_ISL_1993742, EPI_ISL_1993743, EPI_ISL_1993744, EPI_ISL_1993745, EPI_ISL_1993746, EPI_ISL_1993747, EPI_ISL_1993748, EPI_ISL_1993749, EPI_ISL_1993750, EPI_ISL_1993751, EPI_ISL_1993752, EPI_ISL_1993753, EPI_ISL_1993754, EPI_ISL_1993755, EPI_ISL_1993756, EPI_ISL_1993757, EPI_ISL_1993758, EPI_ISL_1993759, EPI_ISL_1993760, EPI_ISL_1993761, EPI_ISL_1993762, EPI_ISL_1993763, EPI_ISL_1993764, EPI_ISL_1993765, EPI_ISL_1993766, EPI_ISL_1993767, EPI_ISL_1993768, EPI_ISL_1993769, EPI_ISL_1993770, EPI_ISL_1993771, EPI_ISL_1993772, EPI_ISL_1993773, EPI_ISL_1993774, EPI_ISL_1993775, EPI_ISL_1993776, EPI_ISL_1993777, EPI_ISL_1993778, EPI_ISL_1993779, EPI_ISL_1993793, EPI_ISL_1993807, EPI_ISL_1993808, EPI_ISL_1993809 | Laboratorio di Microbiologia        | Laboratorio di Microbiologia  | Martinetti Lucchini Gladys, Valeria Spina                                                                                                                                                                                                                                                                   |
| EPI_ISL_1993832, EPI_ISL_1993833, EPI_ISL_1993834, EPI_ISL_1993835, EPI_ISL_1993836, EPI_ISL_1993837, EPI_ISL_1993838, EPI_ISL_1993839, EPI_ISL_1993840, EPI_ISL_1993867, EPI_ISL_1993868, EPI_ISL_1993869, EPI_ISL_1993870, EPI_ISL_1993871, EPI_ISL_1993872                                                                                                                                                                                                                                                                                                                                                                                                                                                                                                                                                                                                                                                                                                                                                                                                                                                                                                                     | see above                           | Laboratorio di Microbiologia  | Martinetti Lucchini Gladys, Valeria Spina                                                                                                                                                                                                                                                                   |
| EPI_ISL_1993875                                                                                                                                                                                                                                                                                                                                                                                                                                                                                                                                                                                                                                                                                                                                                                                                                                                                                                                                                                                                                                                                                                                                                                   | see above                           | Clinical Virology             | Clinical Bacteriology                                                                                                                                                                                                                                                                                       |
| EPI_ISL_1993875                                                                                                                                                                                                                                                                                                                                                                                                                                                                                                                                                                                                                                                                                                                                                                                                                                                                                                                                                                                                                                                                                                                                                                   | Labormedizinisches Zentrum Dr Risch | Clinical Bacteriology         | Tim Roloff, Madlen Stange, Helena MB Seth-Smith, Alfredo Mari, Karoline Leuzinger, Julia Bielicki, Manuel Battegay, Hans Hirsch, Adrian Egli                                                                                                                                                                |
| EPI_ISL_1993883, EPI_ISL_1993884, EPI_ISL_1993885, EPI_ISL_1993886, EPI_ISL_1993887, EPI_ISL_1993888, EPI_ISL_1993889, EPI_ISL_1993890, EPI_ISL_1993891, EPI_ISL_1993892, EPI_ISL_1993893, EPI_ISL_1993894, EPI_ISL_1993895, EPI_ISL_1993896, EPI_ISL_1993897, EPI_ISL_1993898, EPI_ISL_1993899, EPI_ISL_1993900, EPI_ISL_1993901, EPI_ISL_1993902, EPI_ISL_1993903, EPI_ISL_1993904, EPI_ISL_1993905, EPI_ISL_1993906                                                                                                                                                                                                                                                                                                                                                                                                                                                                                                                                                                                                                                                                                                                                                            | see above                           | Clinical Virology             | Clinical Bacteriology                                                                                                                                                                                                                                                                                       |
| EPI_ISL_1993907                                                                                                                                                                                                                                                                                                                                                                                                                                                                                                                                                                                                                                                                                                                                                                                                                                                                                                                                                                                                                                                                                                                                                                   | Synlab Suisse SA                    | Clinical Bacteriology         | Tim Roloff, Madlen Stange, Helena MB Seth-Smith, Alfredo Mari, Karoline Leuzinger, Julia Bielicki, Manuel Battegay, Hans Hirsch, Adrian Egli                                                                                                                                                                |
| EPI_ISL_1993917, EPI_ISL_1993920, EPI_ISL_1993921, EPI_ISL_1993922, EPI_ISL_1993923                                                                                                                                                                                                                                                                                                                                                                                                                                                                                                                                                                                                                                                                                                                                                                                                                                                                                                                                                                                                                                                                                               | Clinical Virology                   | Clinical Bacteriology         | Tim Roloff, Madlen Stange, Helena MB Seth-Smith, Alfredo Mari, Karoline Leuzinger, Julia Bielicki, Manuel Battegay, Hans Hirsch, Adrian Egli                                                                                                                                                                |
| EPI_ISL_1993927, EPI_ISL_1993928, EPI_ISL_1993929                                                                                                                                                                                                                                                                                                                                                                                                                                                                                                                                                                                                                                                                                                                                                                                                                                                                                                                                                                                                                                                                                                                                 | Labormedizinisches Zentrum Dr Risch | Clinical Bacteriology         | Tim Roloff, Madlen Stange, Helena MB Seth-Smith, Alfredo Mari, Karoline Leuzinger, Julia Bielicki, Nadia Wohlwend, Martin Risch, Lorenz Risch, Manuel Battegay, Hans Hirsch, Adrian Egli                                                                                                                    |
| EPI_ISL_2000628, EPI_ISL_2000629, EPI_ISL_2000630, EPI_ISL_2000631, EPI_ISL_2000632, EPI_ISL_2000633, EPI_ISL_2000635, EPI_ISL_2000636, EPI_ISL_2000638, EPI_ISL_2000639, EPI_ISL_2000640, EPI_ISL_2000641, EPI_ISL_2000642, EPI_ISL_2000643, EPI_ISL_2000644, EPI_ISL_2000645, EPI_ISL_2000646, EPI_ISL_2000647, EPI_ISL_2000648, EPI_ISL_2000649, EPI_ISL_2000650, EPI_ISL_2000651, EPI_ISL_2000652, EPI_ISL_2000653, EPI_ISL_2000654, EPI_ISL_2000655, EPI_ISL_2000656, EPI_ISL_2000657, EPI_ISL_2000658, EPI_ISL_2000659, EPI_ISL_2000660, EPI_ISL_2000661, EPI_ISL_2000665, EPI_ISL_2000666, EPI_ISL_2000667, EPI_ISL_2000668, EPI_ISL_2000669, EPI_ISL_2000670, EPI_ISL_2000671                                                                                                                                                                                                                                                                                                                                                                                                                                                                                             | see above                           | Viollier AG                   | Andrea Patrizia Salzmann, Henriette Kurth, Christiane Beckmann, Maurice Redondo, Olivier Kobel, Christoph Noppen                                                                                                                                                                                            |
| EPI_ISL_2007012                                                                                                                                                                                                                                                                                                                                                                                                                                                                                                                                                                                                                                                                                                                                                                                                                                                                                                                                                                                                                                                                                                                                                                   | UniversitätsSpital Zürich           | Institute of Medical Virology | Daniel Ehram, Isabel Stürmer, Catharine Aquino, Joel Wirz, Weihong Qi, Hubert Rehrauer, Verena Kufner, Gabriela Ziltener, Maryam Zaheri, Stefan Schmutz, Annette Audigé, Maria Grünberg, Kevin Steiner, Jon Huder, Cyril Shah, Riccarda Capaul, Guido Bloemberg, Jürg Böni, Michael Huber, Alexandra Trkola |
| EPI_ISL_2007013, EPI_ISL_2007014, EPI_ISL_2007015, EPI_ISL_2007016, EPI_ISL_2007017                                                                                                                                                                                                                                                                                                                                                                                                                                                                                                                                                                                                                                                                                                                                                                                                                                                                                                                                                                                                                                                                                               | Laborgemeinschaft 1                 | Institute of Medical Virology | Daniel Ehram, Isabel Stürmer, Catharine Aquino, Joel Wirz, Weihong Qi, Hubert Rehrauer, Verena Kufner, Gabriela Ziltener, Maryam Zaheri, Stefan Schmutz, Annette Audigé, Maria Grünberg, Kevin Steiner, Jon Huder, Cyril Shah, Riccarda Capaul, Guido Bloemberg, Jürg Böni, Michael Huber, Alexandra Trkola |
| EPI_ISL_2007018                                                                                                                                                                                                                                                                                                                                                                                                                                                                                                                                                                                                                                                                                                                                                                                                                                                                                                                                                                                                                                                                                                                                                                   | UniversitätsSpital Zürich           | Institute of Medical Virology | Daniel Ehram, Isabel Stürmer, Catharine Aquino, Joel Wirz, Weihong Qi, Hubert Rehrauer, Verena Kufner, Gabriela Ziltener, Maryam Zaheri, Stefan Schmutz, Annette Audigé, Maria Grünberg, Kevin Steiner, Jon Huder, Cyril Shah, Riccarda Capaul, Guido Bloemberg, Jürg Böni, Michael Huber, Alexandra Trkola |
| EPI_ISL_2007019                                                                                                                                                                                                                                                                                                                                                                                                                                                                                                                                                                                                                                                                                                                                                                                                                                                                                                                                                                                                                                                                                                                                                                   | UniversitätsSpital Zürich 009       | Institute of Medical Virology | Daniel Ehram, Isabel Stürmer, Catharine Aquino, Joel Wirz, Weihong Qi, Hubert Rehrauer, Verena Kufner, Gabriela Ziltener, Maryam Zaheri, Stefan Schmutz, Annette Audigé, Maria Grünberg, Kevin Steiner, Jon Huder, Cyril Shah, Riccarda Capaul, Guido Bloemberg, Jürg Böni, Michael Huber, Alexandra Trkola |
| EPI_ISL_2007020                                                                                                                                                                                                                                                                                                                                                                                                                                                                                                                                                                                                                                                                                                                                                                                                                                                                                                                                                                                                                                                                                                                                                                   | UniversitätsSpital Zürich 222       | Institute of Medical Virology | Daniel Ehram, Isabel Stürmer, Catharine Aquino, Joel Wirz, Weihong Qi, Hubert Rehrauer, Verena Kufner, Gabriela Ziltener, Maryam Zaheri, Stefan Schmutz, Annette Audigé, Maria Grünberg, Kevin Steiner, Jon Huder, Cyril Shah, Riccarda Capaul, Guido Bloemberg, Jürg Böni, Michael Huber, Alexandra Trkola |
| EPI_ISL_2007021                                                                                                                                                                                                                                                                                                                                                                                                                                                                                                                                                                                                                                                                                                                                                                                                                                                                                                                                                                                                                                                                                                                                                                   | UniversitätsSpital Zürich           | Institute of Medical Virology | Daniel Ehram, Isabel Stürmer, Catharine Aquino, Joel Wirz, Weihong Qi, Hubert Rehrauer, Verena Kufner, Gabriela Ziltener, Maryam Zaheri, Stefan Schmutz, Annette Audigé, Maria Grünberg, Kevin Steiner, Jon Huder, Cyril Shah, Riccarda Capaul, Guido Bloemberg, Jürg Böni, Michael Huber, Alexandra Trkola |
| EPI_ISL_2007022                                                                                                                                                                                                                                                                                                                                                                                                                                                                                                                                                                                                                                                                                                                                                                                                                                                                                                                                                                                                                                                                                                                                                                   | UniversitätsSpital Zürich 009       | Institute of Medical Virology | Daniel Ehram, Isabel Stürmer, Catharine Aquino, Joel Wirz, Weihong Qi, Hubert Rehrauer, Verena Kufner, Gabriela Ziltener, Maryam Zaheri, Stefan Schmutz, Annette Audigé, Maria Grünberg, Kevin Steiner, Jon Huder, Cyril Shah, Riccarda Capaul, Guido Bloemberg, Jürg Böni, Michael Huber, Alexandra Trkola |
| EPI_ISL_2007023                                                                                                                                                                                                                                                                                                                                                                                                                                                                                                                                                                                                                                                                                                                                                                                                                                                                                                                                                                                                                                                                                                                                                                   | UniversitätsSpital Zürich 222       | Institute of Medical Virology | Daniel Ehram, Isabel Stürmer, Catharine Aquino, Joel Wirz, Weihong Qi, Hubert Rehrauer, Verena Kufner, Gabriela Ziltener, Maryam Zaheri, Stefan Schmutz, Annette Audigé, Maria Grünberg, Kevin Steiner, Jon Huder, Cyril Shah, Riccarda Capaul, Guido Bloemberg, Jürg Böni, Michael Huber, Alexandra Trkola |
| EPI_ISL_2007024, EPI_ISL_2007025, EPI_ISL_2007026, EPI_ISL_2007027, EPI_ISL_2007028, EPI_ISL_2007029, EPI_ISL_2007030, EPI_ISL_2007031, EPI_ISL_2007032, EPI_ISL_2007033, EPI_ISL_2007034                                                                                                                                                                                                                                                                                                                                                                                                                                                                                                                                                                                                                                                                                                                                                                                                                                                                                                                                                                                         | see above                           | Spital Limmattal              | Institute of Medical Virology                                                                                                                                                                                                                                                                               |
| EPI_ISL_2007035                                                                                                                                                                                                                                                                                                                                                                                                                                                                                                                                                                                                                                                                                                                                                                                                                                                                                                                                                                                                                                                                                                                                                                   | Testzentrum Dübendorf               | Institute of Medical Virology | Daniel Ehram, Isabel Stürmer, Catharine Aquino, Joel Wirz, Weihong Qi, Hubert Rehrauer, Verena Kufner, Gabriela Ziltener, Maryam Zaheri, Stefan Schmutz, Annette Audigé, Maria Grünberg, Kevin Steiner, Jon Huder, Cyril Shah, Riccarda Capaul, Guido Bloemberg, Jürg Böni, Michael Huber, Alexandra Trkola |
| EPI_ISL_2007036                                                                                                                                                                                                                                                                                                                                                                                                                                                                                                                                                                                                                                                                                                                                                                                                                                                                                                                                                                                                                                                                                                                                                                   | Stadspital Triemli                  | Institute of Medical Virology | Daniel Ehram, Isabel Stürmer, Catharine Aquino, Joel Wirz, Weihong Qi, Hubert Rehrauer, Verena Kufner, Gabriela Ziltener, Maryam Zaheri, Stefan Schmutz, Annette Audigé, Maria Grünberg, Kevin Steiner, Jon Huder, Cyril Shah, Riccarda Capaul, Guido Bloemberg, Jürg Böni, Michael Huber, Alexandra Trkola |
| EPI_ISL_2007037                                                                                                                                                                                                                                                                                                                                                                                                                                                                                                                                                                                                                                                                                                                                                                                                                                                                                                                                                                                                                                                                                                                                                                   | UniversitätsSpital Zürich           | Institute of Medical Virology | Daniel Ehram, Isabel Stürmer, Catharine Aquino, Joel Wirz, Weihong Qi, Hubert Rehrauer, Verena Kufner, Gabriela Ziltener, Maryam Zaheri, Stefan Schmutz, Annette Audigé, Maria Grünberg, Kevin Steiner, Jon Huder, Cyril Shah, Riccarda Capaul, Guido Bloemberg, Jürg Böni, Michael Huber, Alexandra Trkola |
| EPI_ISL_2007038                                                                                                                                                                                                                                                                                                                                                                                                                                                                                                                                                                                                                                                                                                                                                                                                                                                                                                                                                                                                                                                                                                                                                                   | Spital Limmattal                    | Institute of Medical Virology | Daniel Ehram, Isabel Stürmer, Catharine Aquino, Joel Wirz, Weihong Qi, Hubert Rehrauer, Verena Kufner, Gabriela Ziltener, Maryam Zaheri, Stefan Schmutz, Annette Audigé, Maria Grünberg, Kevin Steiner, Jon Huder, Cyril Shah, Riccarda Capaul, Guido Bloemberg, Jürg Böni, Michael Huber, Alexandra Trkola |
| EPI_ISL_2007039, EPI_ISL_2007040, EPI_ISL_2007041, EPI_ISL_2007042, EPI_ISL_2007043                                                                                                                                                                                                                                                                                                                                                                                                                                                                                                                                                                                                                                                                                                                                                                                                                                                                                                                                                                                                                                                                                               | Laborgemeinschaft 1                 | Institute of Medical Virology | Daniel Ehram, Isabel Stürmer, Catharine Aquino, Joel Wirz, Weihong Qi, Hubert Rehrauer, Verena Kufner, Gabriela Ziltener, Maryam Zaheri, Stefan Schmutz, Annette Audigé, Maria Grünberg, Kevin Steiner, Jon Huder, Cyril Shah, Riccarda Capaul, Guido Bloemberg, Jürg Böni, Michael Huber, Alexandra Trkola |
| EPI_ISL_2007044, EPI_ISL_2007045, EPI_ISL_2007046, EPI_ISL_2007047                                                                                                                                                                                                                                                                                                                                                                                                                                                                                                                                                                                                                                                                                                                                                                                                                                                                                                                                                                                                                                                                                                                | Spital Limmattal                    | Institute of Medical Virology | Daniel Ehram, Isabel Stürmer, Catharine Aquino, Joel Wirz, Weihong Qi, Hubert Rehrauer, Verena Kufner, Gabriela Ziltener, Maryam Zaheri, Stefan Schmutz, Annette Audigé, Maria Grünberg, Kevin Steiner, Jon Huder, Cyril Shah, Riccarda Capaul, Guido Bloemberg, Jürg Böni, Michael Huber, Alexandra Trkola |
| EPI_ISL_2007048, EPI_ISL_2007049, EPI_ISL_2007050, EPI_ISL_2007051, EPI_ISL_2007052, EPI_ISL_2007053, EPI_ISL_2007054, EPI_ISL_2007055, EPI_ISL_2007056, EPI_ISL_2007057, EPI_ISL_2007058, EPI_ISL_2007059, EPI_ISL_2007060, EPI_ISL_2007061, EPI_ISL_2007062, EPI_ISL_2007063, EPI_ISL_2007064, EPI_ISL_2007065, EPI_ISL_2007066, EPI_ISL_2007067, EPI_ISL_2007068, EPI_ISL_2007069, EPI_ISL_2007070, EPI_ISL_2007071, EPI_ISL_2007072, EPI_ISL_2007073, EPI_ISL_2007074                                                                                                                                                                                                                                                                                                                                                                                                                                                                                                                                                                                                                                                                                                         | see above                           | UniversitätsSpital Zürich     | Institute of Medical Virology                                                                                                                                                                                                                                                                               |
| EPI_ISL_2007048, EPI_ISL_2007049, EPI_ISL_2007050, EPI_ISL_2007051, EPI_ISL_2007052, EPI_ISL_2007053, EPI_ISL_2007054, EPI_ISL_2007055, EPI_ISL_2007056, EPI_ISL_2007057, EPI_ISL_2007058, EPI_ISL_2007059, EPI_ISL_2007060, EPI_ISL_2007061, EPI_ISL_2007062, EPI_ISL_2007063, EPI_ISL_2007064, EPI_ISL_2007065, EPI_ISL_2007066, EPI_ISL_2007067, EPI_ISL_2007068, EPI_ISL_2007069, EPI_ISL_2007070, EPI_ISL_2007071, EPI_ISL_2007072, EPI_ISL_2007073, EPI_ISL_2007074                                                                                                                                                                                                                                                                                                                                                                                                                                                                                                                                                                                                                                                                                                         | see above                           | UniversitätsSpital Zürich     | Institute of Medical Virology                                                                                                                                                                                                                                                                               |
| EPI_ISL_2007048, EPI_ISL_2007049, EPI_ISL_2007050, EPI_ISL_2007051, EPI_ISL_2007052, EPI_ISL_2007053, EPI_ISL_2007054, EPI_ISL_2007055, EPI_ISL_2007056, EPI_ISL_2007057, EPI_ISL_2007058, EPI_ISL_2007059, EPI_ISL_2007060, EPI_ISL_2007061, EPI_ISL_2007062, EPI_ISL_2007063, EPI_ISL_2007064, EPI_ISL_2007065, EPI_ISL_2007066, EPI_ISL_2007067, EPI_ISL_2007068, EPI_ISL_2007069, EPI_ISL_2007070, EPI_ISL_2007071, EPI_ISL_2007072, EPI_ISL_2007073, EPI_ISL_2007074                                                                                                                                                                                                                                                                                                                                                                                                                                                                                                                                                                                                                                                                                                         | see above                           | UniversitätsSpital Zürich     | Institute of Medical Virology                                                                                                                                                                                                                                                                               |



|                                                                                                                                                                                                                                                                                                                  |           |             |                                                                                                                                                                                                                      |
|------------------------------------------------------------------------------------------------------------------------------------------------------------------------------------------------------------------------------------------------------------------------------------------------------------------|-----------|-------------|----------------------------------------------------------------------------------------------------------------------------------------------------------------------------------------------------------------------|
|                                                                                                                                                                                                                                                                                                                  |           | Zürich      | Philipp Jablonski, Lara Fuhrmann, David Dreifuss, Katharina Jahn, Christiane Beckmann, Maurice Redondo, Olivier Kobel, Christoph Noppen, Sophie Seidel, Noemie Santamaria de Souza, Niko Beerenwinkel, Tanja Stadler |
| EPI_ISL_2017078, EPI_ISL_2017079, EPI_ISL_2017080, EPI_ISL_2017081, EPI_ISL_2017082, EPI_ISL_2017083, EPI_ISL_2017084, EPI_ISL_2017085, EPI_ISL_2017086, EPI_ISL_2017087, EPI_ISL_2017088, EPI_ISL_2017089, EPI_ISL_2017090, EPI_ISL_2017091, EPI_ISL_2017092                                                    | see above | Viollier AG | Department of Biosystems Science and Engineering, ETH Zürich                                                                                                                                                         |
| EPI_ISL_2017093                                                                                                                                                                                                                                                                                                  |           | Viollier AG | Department of Biosystems Science and Engineering, ETH Zürich                                                                                                                                                         |
| EPI_ISL_2017094, EPI_ISL_2017095, EPI_ISL_2017096                                                                                                                                                                                                                                                                |           | Viollier AG | Department of Biosystems Science and Engineering, ETH Zürich                                                                                                                                                         |
| EPI_ISL_2017097                                                                                                                                                                                                                                                                                                  |           | Viollier AG | Department of Biosystems Science and Engineering, ETH Zürich                                                                                                                                                         |
| EPI_ISL_2017098, EPI_ISL_2017099, EPI_ISL_2017100                                                                                                                                                                                                                                                                |           | Viollier AG | Department of Biosystems Science and Engineering, ETH Zürich                                                                                                                                                         |
| EPI_ISL_2017101                                                                                                                                                                                                                                                                                                  |           | Viollier AG | Department of Biosystems Science and Engineering, ETH Zürich                                                                                                                                                         |
| EPI_ISL_2017102                                                                                                                                                                                                                                                                                                  |           | Viollier AG | Department of Biosystems Science and Engineering, ETH Zürich                                                                                                                                                         |
| EPI_ISL_2017103                                                                                                                                                                                                                                                                                                  |           | Viollier AG | Department of Biosystems Science and Engineering, ETH Zürich                                                                                                                                                         |
| EPI_ISL_2017104, EPI_ISL_2017105, EPI_ISL_2017106, EPI_ISL_2017107, EPI_ISL_2017108, EPI_ISL_2017109, EPI_ISL_2017110, EPI_ISL_2017111, EPI_ISL_2017112, EPI_ISL_2017113, EPI_ISL_2017114                                                                                                                        | see above | Viollier AG | Department of Biosystems Science and Engineering, ETH Zürich                                                                                                                                                         |
| EPI_ISL_2017115, EPI_ISL_2017116                                                                                                                                                                                                                                                                                 |           | Viollier AG | Department of Biosystems Science and Engineering, ETH Zürich                                                                                                                                                         |
| EPI_ISL_2017117, EPI_ISL_2017118, EPI_ISL_2017119, EPI_ISL_2017120                                                                                                                                                                                                                                               |           | Viollier AG | Department of Biosystems Science and Engineering, ETH Zürich                                                                                                                                                         |
| EPI_ISL_2017121                                                                                                                                                                                                                                                                                                  |           | Viollier AG | Department of Biosystems Science and Engineering, ETH Zürich                                                                                                                                                         |
| EPI_ISL_2017122, EPI_ISL_2017123, EPI_ISL_2017124, EPI_ISL_2017125, EPI_ISL_2017126, EPI_ISL_2017127, EPI_ISL_2017128, EPI_ISL_2017129, EPI_ISL_2017130, EPI_ISL_2017131, EPI_ISL_2017132, EPI_ISL_2017133, EPI_ISL_2017134, EPI_ISL_2017135, EPI_ISL_2017136, EPI_ISL_2017137, EPI_ISL_2017138, EPI_ISL_2017139 | see above | Viollier AG | Department of Biosystems Science and Engineering, ETH Zürich                                                                                                                                                         |
| EPI_ISL_2017140                                                                                                                                                                                                                                                                                                  |           | Viollier AG | Department of Biosystems Science and Engineering, ETH Zürich                                                                                                                                                         |
| EPI_ISL_2017141, EPI_ISL_2017142, EPI_ISL_2017143, EPI_ISL_2017144, EPI_ISL_2017145, EPI_ISL_2017146, EPI_ISL_2017147                                                                                                                                                                                            |           | Viollier AG | Department of Biosystems Science and Engineering, ETH Zürich                                                                                                                                                         |
| EPI_ISL_2017148                                                                                                                                                                                                                                                                                                  |           | Viollier AG | Department of Biosystems Science and Engineering, ETH Zürich                                                                                                                                                         |
| EPI_ISL_2017149                                                                                                                                                                                                                                                                                                  |           | Viollier AG | Department of Biosystems Science and Engineering, ETH Zürich                                                                                                                                                         |
| EPI_ISL_2017150, EPI_ISL_2017151                                                                                                                                                                                                                                                                                 |           | Viollier AG | Department of Biosystems Science and Engineering, ETH Zürich                                                                                                                                                         |
| EPI_ISL_2017152, EPI_ISL_2017153, EPI_ISL_2017154                                                                                                                                                                                                                                                                |           | Viollier AG | Department of Biosystems Science and Engineering, ETH Zürich                                                                                                                                                         |
| EPI_ISL_2017155                                                                                                                                                                                                                                                                                                  |           | Viollier AG | Department of Biosystems Science and Engineering, ETH Zürich                                                                                                                                                         |
| EPI_ISL_2017156, EPI_ISL_2017157, EPI_ISL_2017158                                                                                                                                                                                                                                                                |           | Viollier AG | Department of Biosystems Science and Engineering, ETH Zürich                                                                                                                                                         |
| EPI_ISL_2017159, EPI_ISL_2017160, EPI_ISL_2017161, EPI_ISL_2017162, EPI_ISL_2017163, EPI_ISL_2017164, EPI_ISL_2017165                                                                                                                                                                                            |           | Viollier AG | Department of Biosystems Science and Engineering, ETH Zürich                                                                                                                                                         |





|                                                                                                                                                                                                                                                                                                                                                                                                                                                                                                                                                                                                                                                                                                                                                                                                                                                                                                                                                                                                                                                                                                                                                                                                                                                                                                                                                                                                                                                                                                                                                                                                                                                                                                                                                                                                                                                                                                                                                                                                                                                                                                                                                                                                                                                                                                                                                                                                                                                                                                                                                                                                                                                                                                                          |                                                                    |                                                                    |                                                                                                                                                                                                                                                                                                                                                                                                                                                                         |  |
|--------------------------------------------------------------------------------------------------------------------------------------------------------------------------------------------------------------------------------------------------------------------------------------------------------------------------------------------------------------------------------------------------------------------------------------------------------------------------------------------------------------------------------------------------------------------------------------------------------------------------------------------------------------------------------------------------------------------------------------------------------------------------------------------------------------------------------------------------------------------------------------------------------------------------------------------------------------------------------------------------------------------------------------------------------------------------------------------------------------------------------------------------------------------------------------------------------------------------------------------------------------------------------------------------------------------------------------------------------------------------------------------------------------------------------------------------------------------------------------------------------------------------------------------------------------------------------------------------------------------------------------------------------------------------------------------------------------------------------------------------------------------------------------------------------------------------------------------------------------------------------------------------------------------------------------------------------------------------------------------------------------------------------------------------------------------------------------------------------------------------------------------------------------------------------------------------------------------------------------------------------------------------------------------------------------------------------------------------------------------------------------------------------------------------------------------------------------------------------------------------------------------------------------------------------------------------------------------------------------------------------------------------------------------------------------------------------------------------|--------------------------------------------------------------------|--------------------------------------------------------------------|-------------------------------------------------------------------------------------------------------------------------------------------------------------------------------------------------------------------------------------------------------------------------------------------------------------------------------------------------------------------------------------------------------------------------------------------------------------------------|--|
| EPI_ISL_2019405, EPI_ISL_2019406, EPI_ISL_2019407, EPI_ISL_2019408, EPI_ISL_2019409, EPI_ISL_2019410, EPI_ISL_2019411, EPI_ISL_2019412, EPI_ISL_2019413, EPI_ISL_2019414, EPI_ISL_2019415, EPI_ISL_2019416, EPI_ISL_2019417, EPI_ISL_2019418, EPI_ISL_2019419, EPI_ISL_2019420, EPI_ISL_2019421, EPI_ISL_2019422, EPI_ISL_2019423, EPI_ISL_2019424, EPI_ISL_2019425, EPI_ISL_2019426, EPI_ISL_2019427, EPI_ISL_2019428, EPI_ISL_2019429, EPI_ISL_2019430, EPI_ISL_2019431, EPI_ISL_2019432, EPI_ISL_2019433, EPI_ISL_2019434, EPI_ISL_2019435, EPI_ISL_2019436, EPI_ISL_2019437, EPI_ISL_2019438, EPI_ISL_2019439, EPI_ISL_2019440, EPI_ISL_2019441, EPI_ISL_2019442, EPI_ISL_2019443, EPI_ISL_2019444, EPI_ISL_2019445, EPI_ISL_2019446, EPI_ISL_2019447, EPI_ISL_2019448, EPI_ISL_2019449, EPI_ISL_2019450, EPI_ISL_2019451, EPI_ISL_2019452, EPI_ISL_2019453, EPI_ISL_2019454, EPI_ISL_2019455, EPI_ISL_2019456, EPI_ISL_2019457, EPI_ISL_2019458, EPI_ISL_2019459, EPI_ISL_2019460, EPI_ISL_2019461, EPI_ISL_2019462, EPI_ISL_2019463, EPI_ISL_2019464, EPI_ISL_2019465, EPI_ISL_2019466, EPI_ISL_2019467, EPI_ISL_2019468, EPI_ISL_2019469, EPI_ISL_2019470, EPI_ISL_2019471, EPI_ISL_2019472, EPI_ISL_2019473, EPI_ISL_2019474, EPI_ISL_2019475, EPI_ISL_2019476, EPI_ISL_2019477, EPI_ISL_2019478, EPI_ISL_2019479, EPI_ISL_2019480, EPI_ISL_2019481, EPI_ISL_2019482, EPI_ISL_2019483, EPI_ISL_2019484, EPI_ISL_2019485, EPI_ISL_2019486, EPI_ISL_2019487, EPI_ISL_2019488, EPI_ISL_2019489, EPI_ISL_2019490, EPI_ISL_2019491, EPI_ISL_2019492, EPI_ISL_2019493, EPI_ISL_2019494, EPI_ISL_2019495, EPI_ISL_2019496, EPI_ISL_2019497, EPI_ISL_2019498, EPI_ISL_2019499, EPI_ISL_2019500, EPI_ISL_2019501, EPI_ISL_2019502, EPI_ISL_2019503, EPI_ISL_2019504, EPI_ISL_2019505, EPI_ISL_2019506, EPI_ISL_2019507, EPI_ISL_2019508, EPI_ISL_2019509, EPI_ISL_2019510, EPI_ISL_2019511, EPI_ISL_2019512, EPI_ISL_2019513, EPI_ISL_2019514, EPI_ISL_2019515, EPI_ISL_2019516, EPI_ISL_2019517, EPI_ISL_2019518, EPI_ISL_2019519, EPI_ISL_2019520, EPI_ISL_2019521, EPI_ISL_2019522, EPI_ISL_2019523, EPI_ISL_2019524, EPI_ISL_2019525, EPI_ISL_2019526, EPI_ISL_2019527, EPI_ISL_2019528, EPI_ISL_2019529, EPI_ISL_2019530, EPI_ISL_2019531, EPI_ISL_2019532, EPI_ISL_2019533, EPI_ISL_2019534, EPI_ISL_2019535, EPI_ISL_2019536, EPI_ISL_2019537, EPI_ISL_2019538, EPI_ISL_2019539, EPI_ISL_2019540, EPI_ISL_2019541, EPI_ISL_2019542, EPI_ISL_2019543, EPI_ISL_2019544, EPI_ISL_2019545, EPI_ISL_2019546, EPI_ISL_2019547, EPI_ISL_2019548, EPI_ISL_2019549, EPI_ISL_2019550, EPI_ISL_2019551, EPI_ISL_2019552, EPI_ISL_2019553, EPI_ISL_2019554, EPI_ISL_2019555, EPI_ISL_2019556, EPI_ISL_2019557, EPI_ISL_2019558 |                                                                    |                                                                    |                                                                                                                                                                                                                                                                                                                                                                                                                                                                         |  |
| see above                                                                                                                                                                                                                                                                                                                                                                                                                                                                                                                                                                                                                                                                                                                                                                                                                                                                                                                                                                                                                                                                                                                                                                                                                                                                                                                                                                                                                                                                                                                                                                                                                                                                                                                                                                                                                                                                                                                                                                                                                                                                                                                                                                                                                                                                                                                                                                                                                                                                                                                                                                                                                                                                                                                | Viollier AG                                                        | Department of Biosystems Science and Engineering, ETH Zürich       | Chaoran Chen, Sarah Nadeau, Catharine Aquino, Ivan Topolsky, Philipp Jablonski, Lara Fuhrmann, David Dreifuss, Katharina Jahn, Andrea Cabral de Gouvea, Maria Domenica Moccia, Simon Grüter, Timothy Sykes, Lennart Opitz, Griffin White, Laura Neff, Doris Popovic, Andrea Patrignani, Jay Tracy, Ralph Schlapbach, Christiane Beckmann, Maurice Redondo, Olivier Kobel, Christoph Noppen, Sophie Seidel, Noemie Santamaria de Souza, Niko Beerenwinkel, Tanja Stadler |  |
| EPI_ISL_2020243                                                                                                                                                                                                                                                                                                                                                                                                                                                                                                                                                                                                                                                                                                                                                                                                                                                                                                                                                                                                                                                                                                                                                                                                                                                                                                                                                                                                                                                                                                                                                                                                                                                                                                                                                                                                                                                                                                                                                                                                                                                                                                                                                                                                                                                                                                                                                                                                                                                                                                                                                                                                                                                                                                          | UniversitätsSpital Zürich 044                                      | Institute of Medical Virology                                      | Daniel Ehram, Isabel Stürmer, Catharine Aquino, Joel Wirz, Weihong Qi, Hubert Rehrauer, Verena Kufner, Gabriela Ziltener, Maryam Zaheri, Stefan Schmutz, Annette Audigé, Maria Grünberg, Kevin Steiner, Jon Huder, Cyril Shah, Riccarda Capaul, Guido Bloemberg, Jürg Böni, Michael Huber, Alexandra Trkola                                                                                                                                                             |  |
| EPI_ISL_2020244                                                                                                                                                                                                                                                                                                                                                                                                                                                                                                                                                                                                                                                                                                                                                                                                                                                                                                                                                                                                                                                                                                                                                                                                                                                                                                                                                                                                                                                                                                                                                                                                                                                                                                                                                                                                                                                                                                                                                                                                                                                                                                                                                                                                                                                                                                                                                                                                                                                                                                                                                                                                                                                                                                          | UniversitätsSpital Zürich                                          | Institute of Medical Virology                                      | Daniel Ehram, Isabel Stürmer, Catharine Aquino, Joel Wirz, Weihong Qi, Hubert Rehrauer, Verena Kufner, Gabriela Ziltener, Maryam Zaheri, Stefan Schmutz, Annette Audigé, Maria Grünberg, Kevin Steiner, Jon Huder, Cyril Shah, Riccarda Capaul, Guido Bloemberg, Jürg Böni, Michael Huber, Alexandra Trkola                                                                                                                                                             |  |
| EPI_ISL_2020245, EPI_ISL_2020246, EPI_ISL_2020247, EPI_ISL_2020248, EPI_ISL_2020249, EPI_ISL_2020250, EPI_ISL_2020251, EPI_ISL_2020252, EPI_ISL_2020253, EPI_ISL_2020254, EPI_ISL_2020255, EPI_ISL_2020256                                                                                                                                                                                                                                                                                                                                                                                                                                                                                                                                                                                                                                                                                                                                                                                                                                                                                                                                                                                                                                                                                                                                                                                                                                                                                                                                                                                                                                                                                                                                                                                                                                                                                                                                                                                                                                                                                                                                                                                                                                                                                                                                                                                                                                                                                                                                                                                                                                                                                                               |                                                                    |                                                                    |                                                                                                                                                                                                                                                                                                                                                                                                                                                                         |  |
| see above                                                                                                                                                                                                                                                                                                                                                                                                                                                                                                                                                                                                                                                                                                                                                                                                                                                                                                                                                                                                                                                                                                                                                                                                                                                                                                                                                                                                                                                                                                                                                                                                                                                                                                                                                                                                                                                                                                                                                                                                                                                                                                                                                                                                                                                                                                                                                                                                                                                                                                                                                                                                                                                                                                                | Spital Männedorf AG                                                | Institute of Medical Virology                                      | Daniel Ehram, Isabel Stürmer, Catharine Aquino, Joel Wirz, Weihong Qi, Hubert Rehrauer, Verena Kufner, Gabriela Ziltener, Maryam Zaheri, Stefan Schmutz, Annette Audigé, Maria Grünberg, Kevin Steiner, Jon Huder, Cyril Shah, Riccarda Capaul, Guido Bloemberg, Jürg Böni, Michael Huber, Alexandra Trkola                                                                                                                                                             |  |
| EPI_ISL_2020257, EPI_ISL_2020258                                                                                                                                                                                                                                                                                                                                                                                                                                                                                                                                                                                                                                                                                                                                                                                                                                                                                                                                                                                                                                                                                                                                                                                                                                                                                                                                                                                                                                                                                                                                                                                                                                                                                                                                                                                                                                                                                                                                                                                                                                                                                                                                                                                                                                                                                                                                                                                                                                                                                                                                                                                                                                                                                         | Spital Limmattal                                                   | Institute of Medical Virology                                      | Daniel Ehram, Isabel Stürmer, Catharine Aquino, Joel Wirz, Weihong Qi, Hubert Rehrauer, Verena Kufner, Gabriela Ziltener, Maryam Zaheri, Stefan Schmutz, Annette Audigé, Maria Grünberg, Kevin Steiner, Jon Huder, Cyril Shah, Riccarda Capaul, Guido Bloemberg, Jürg Böni, Michael Huber, Alexandra Trkola                                                                                                                                                             |  |
| EPI_ISL_2020259, EPI_ISL_2020260, EPI_ISL_2020261, EPI_ISL_2020262, EPI_ISL_2020263, EPI_ISL_2020264                                                                                                                                                                                                                                                                                                                                                                                                                                                                                                                                                                                                                                                                                                                                                                                                                                                                                                                                                                                                                                                                                                                                                                                                                                                                                                                                                                                                                                                                                                                                                                                                                                                                                                                                                                                                                                                                                                                                                                                                                                                                                                                                                                                                                                                                                                                                                                                                                                                                                                                                                                                                                     | Spital Männedorf AG                                                | Institute of Medical Virology                                      | Daniel Ehram, Isabel Stürmer, Catharine Aquino, Joel Wirz, Weihong Qi, Hubert Rehrauer, Verena Kufner, Gabriela Ziltener, Maryam Zaheri, Stefan Schmutz, Annette Audigé, Maria Grünberg, Kevin Steiner, Jon Huder, Cyril Shah, Riccarda Capaul, Guido Bloemberg, Jürg Böni, Michael Huber, Alexandra Trkola                                                                                                                                                             |  |
| EPI_ISL_2020265, EPI_ISL_2020266                                                                                                                                                                                                                                                                                                                                                                                                                                                                                                                                                                                                                                                                                                                                                                                                                                                                                                                                                                                                                                                                                                                                                                                                                                                                                                                                                                                                                                                                                                                                                                                                                                                                                                                                                                                                                                                                                                                                                                                                                                                                                                                                                                                                                                                                                                                                                                                                                                                                                                                                                                                                                                                                                         | UniversitätsSpital Zürich                                          | Institute of Medical Virology                                      | Daniel Ehram, Isabel Stürmer, Catharine Aquino, Joel Wirz, Weihong Qi, Hubert Rehrauer, Verena Kufner, Gabriela Ziltener, Maryam Zaheri, Stefan Schmutz, Annette Audigé, Maria Grünberg, Kevin Steiner, Jon Huder, Cyril Shah, Riccarda Capaul, Guido Bloemberg, Jürg Böni, Michael Huber, Alexandra Trkola                                                                                                                                                             |  |
| EPI_ISL_2020267, EPI_ISL_2020268                                                                                                                                                                                                                                                                                                                                                                                                                                                                                                                                                                                                                                                                                                                                                                                                                                                                                                                                                                                                                                                                                                                                                                                                                                                                                                                                                                                                                                                                                                                                                                                                                                                                                                                                                                                                                                                                                                                                                                                                                                                                                                                                                                                                                                                                                                                                                                                                                                                                                                                                                                                                                                                                                         | Spital Limmattal                                                   | Institute of Medical Virology                                      | Daniel Ehram, Isabel Stürmer, Catharine Aquino, Joel Wirz, Weihong Qi, Hubert Rehrauer, Verena Kufner, Gabriela Ziltener, Maryam Zaheri, Stefan Schmutz, Annette Audigé, Maria Grünberg, Kevin Steiner, Jon Huder, Cyril Shah, Riccarda Capaul, Guido Bloemberg, Jürg Böni, Michael Huber, Alexandra Trkola                                                                                                                                                             |  |
| EPI_ISL_2020269, EPI_ISL_2020270, EPI_ISL_2020271, EPI_ISL_2020272, EPI_ISL_2020273, EPI_ISL_2020274, EPI_ISL_2020275, EPI_ISL_2020276, EPI_ISL_2020277, EPI_ISL_2020278, EPI_ISL_2020279, EPI_ISL_2020280, EPI_ISL_2020281, EPI_ISL_2020282, EPI_ISL_2020283, EPI_ISL_2020284, EPI_ISL_2020285, EPI_ISL_2020286, EPI_ISL_2020287, EPI_ISL_2020288, EPI_ISL_2020289, EPI_ISL_2020290, EPI_ISL_2020291, EPI_ISL_2020292, EPI_ISL_2020293, EPI_ISL_2020294, EPI_ISL_2020295, EPI_ISL_2020296, EPI_ISL_2020297, EPI_ISL_2020298, EPI_ISL_2020299, EPI_ISL_2020300, EPI_ISL_2020301, EPI_ISL_2020302, EPI_ISL_2020303, EPI_ISL_2020304, EPI_ISL_2020305, EPI_ISL_2020306, EPI_ISL_2020307, EPI_ISL_2020308, EPI_ISL_2020309, EPI_ISL_2020310, EPI_ISL_2020311, EPI_ISL_2020312, EPI_ISL_2020313, EPI_ISL_2020314, EPI_ISL_2020315, EPI_ISL_2020316, EPI_ISL_2020317, EPI_ISL_2020318, EPI_ISL_2020319, EPI_ISL_2020320, EPI_ISL_2020321, EPI_ISL_2020322, EPI_ISL_2020323, EPI_ISL_2020324, EPI_ISL_2020325, EPI_ISL_2020326                                                                                                                                                                                                                                                                                                                                                                                                                                                                                                                                                                                                                                                                                                                                                                                                                                                                                                                                                                                                                                                                                                                                                                                                                                                                                                                                                                                                                                                                                                                                                                                                                                                                                                 |                                                                    |                                                                    |                                                                                                                                                                                                                                                                                                                                                                                                                                                                         |  |
| see above                                                                                                                                                                                                                                                                                                                                                                                                                                                                                                                                                                                                                                                                                                                                                                                                                                                                                                                                                                                                                                                                                                                                                                                                                                                                                                                                                                                                                                                                                                                                                                                                                                                                                                                                                                                                                                                                                                                                                                                                                                                                                                                                                                                                                                                                                                                                                                                                                                                                                                                                                                                                                                                                                                                | UniversitätsSpital Zürich                                          | Institute of Medical Virology                                      | Daniel Ehram, Isabel Stürmer, Catharine Aquino, Joel Wirz, Weihong Qi, Hubert Rehrauer, Verena Kufner, Gabriela Ziltener, Maryam Zaheri, Stefan Schmutz, Annette Audigé, Maria Grünberg, Kevin Steiner, Jon Huder, Cyril Shah, Riccarda Capaul, Guido Bloemberg, Jürg Böni, Michael Huber, Alexandra Trkola                                                                                                                                                             |  |
| EPI_ISL_2020327                                                                                                                                                                                                                                                                                                                                                                                                                                                                                                                                                                                                                                                                                                                                                                                                                                                                                                                                                                                                                                                                                                                                                                                                                                                                                                                                                                                                                                                                                                                                                                                                                                                                                                                                                                                                                                                                                                                                                                                                                                                                                                                                                                                                                                                                                                                                                                                                                                                                                                                                                                                                                                                                                                          | Kantonsspital Aarau                                                | Institute of Medical Virology                                      | Verena Kufner, Gabriela Ziltener, Maryam Zaheri, Stefan Schmutz, Annette Audigé, Maria Grünberg, Kevin Steiner, Jon Huder, Cyril Shah, Riccarda Capaul, Guido Bloemberg, Jürg Böni, Michael Huber, Alexandra Trkola                                                                                                                                                                                                                                                     |  |
| EPI_ISL_2020328, EPI_ISL_2020329                                                                                                                                                                                                                                                                                                                                                                                                                                                                                                                                                                                                                                                                                                                                                                                                                                                                                                                                                                                                                                                                                                                                                                                                                                                                                                                                                                                                                                                                                                                                                                                                                                                                                                                                                                                                                                                                                                                                                                                                                                                                                                                                                                                                                                                                                                                                                                                                                                                                                                                                                                                                                                                                                         | UniversitätsSpital Zürich                                          | Institute of Medical Virology                                      | Verena Kufner, Gabriela Ziltener, Maryam Zaheri, Stefan Schmutz, Annette Audigé, Maria Grünberg, Kevin Steiner, Jon Huder, Cyril Shah, Riccarda Capaul, Guido Bloemberg, Jürg Böni, Michael Huber, Alexandra Trkola                                                                                                                                                                                                                                                     |  |
| EPI_ISL_2020330                                                                                                                                                                                                                                                                                                                                                                                                                                                                                                                                                                                                                                                                                                                                                                                                                                                                                                                                                                                                                                                                                                                                                                                                                                                                                                                                                                                                                                                                                                                                                                                                                                                                                                                                                                                                                                                                                                                                                                                                                                                                                                                                                                                                                                                                                                                                                                                                                                                                                                                                                                                                                                                                                                          | Unilabs                                                            | Institute of Medical Virology                                      | Verena Kufner, Gabriela Ziltener, Maryam Zaheri, Stefan Schmutz, Annette Audigé, Maria Grünberg, Kevin Steiner, Jon Huder, Cyril Shah, Riccarda Capaul, Guido Bloemberg, Jürg Böni, Michael Huber, Alexandra Trkola                                                                                                                                                                                                                                                     |  |
| EPI_ISL_2020332                                                                                                                                                                                                                                                                                                                                                                                                                                                                                                                                                                                                                                                                                                                                                                                                                                                                                                                                                                                                                                                                                                                                                                                                                                                                                                                                                                                                                                                                                                                                                                                                                                                                                                                                                                                                                                                                                                                                                                                                                                                                                                                                                                                                                                                                                                                                                                                                                                                                                                                                                                                                                                                                                                          | Laborgemeinschaft 1                                                | Institute of Medical Virology                                      | Verena Kufner, Gabriela Ziltener, Maryam Zaheri, Stefan Schmutz, Annette Audigé, Maria Grünberg, Kevin Steiner, Jon Huder, Cyril Shah, Riccarda Capaul, Guido Bloemberg, Jürg Böni, Michael Huber, Alexandra Trkola                                                                                                                                                                                                                                                     |  |
| EPI_ISL_2020338, EPI_ISL_2020339                                                                                                                                                                                                                                                                                                                                                                                                                                                                                                                                                                                                                                                                                                                                                                                                                                                                                                                                                                                                                                                                                                                                                                                                                                                                                                                                                                                                                                                                                                                                                                                                                                                                                                                                                                                                                                                                                                                                                                                                                                                                                                                                                                                                                                                                                                                                                                                                                                                                                                                                                                                                                                                                                         | UniversitätsSpital Zürich                                          | Institute of Medical Virology                                      | Verena Kufner, Gabriela Ziltener, Maryam Zaheri, Stefan Schmutz, Annette Audigé, Maria Grünberg, Kevin Steiner, Jon Huder, Cyril Shah, Riccarda Capaul, Guido Bloemberg, Jürg Böni, Michael Huber, Alexandra Trkola                                                                                                                                                                                                                                                     |  |
| EPI_ISL_2020340, EPI_ISL_2020342, EPI_ISL_2020343, EPI_ISL_2020344                                                                                                                                                                                                                                                                                                                                                                                                                                                                                                                                                                                                                                                                                                                                                                                                                                                                                                                                                                                                                                                                                                                                                                                                                                                                                                                                                                                                                                                                                                                                                                                                                                                                                                                                                                                                                                                                                                                                                                                                                                                                                                                                                                                                                                                                                                                                                                                                                                                                                                                                                                                                                                                       | UniversitätsSpital Zürich 009                                      | Institute of Medical Virology                                      | Verena Kufner, Gabriela Ziltener, Maryam Zaheri, Stefan Schmutz, Annette Audigé, Maria Grünberg, Kevin Steiner, Jon Huder, Cyril Shah, Riccarda Capaul, Guido Bloemberg, Jürg Böni, Michael Huber, Alexandra Trkola                                                                                                                                                                                                                                                     |  |
| EPI_ISL_2020353                                                                                                                                                                                                                                                                                                                                                                                                                                                                                                                                                                                                                                                                                                                                                                                                                                                                                                                                                                                                                                                                                                                                                                                                                                                                                                                                                                                                                                                                                                                                                                                                                                                                                                                                                                                                                                                                                                                                                                                                                                                                                                                                                                                                                                                                                                                                                                                                                                                                                                                                                                                                                                                                                                          | Spital Männedorf AG                                                | Institute of Medical Virology                                      | Verena Kufner, Gabriela Ziltener, Maryam Zaheri, Stefan Schmutz, Annette Audigé, Maria Grünberg, Kevin Steiner, Jon Huder, Cyril Shah, Riccarda Capaul, Guido Bloemberg, Jürg Böni, Michael Huber, Alexandra Trkola                                                                                                                                                                                                                                                     |  |
| EPI_ISL_2020355, EPI_ISL_2020356                                                                                                                                                                                                                                                                                                                                                                                                                                                                                                                                                                                                                                                                                                                                                                                                                                                                                                                                                                                                                                                                                                                                                                                                                                                                                                                                                                                                                                                                                                                                                                                                                                                                                                                                                                                                                                                                                                                                                                                                                                                                                                                                                                                                                                                                                                                                                                                                                                                                                                                                                                                                                                                                                         | Arzthaus Zürich Stadelhofen                                        | Institute of Medical Virology                                      | Verena Kufner, Gabriela Ziltener, Maryam Zaheri, Stefan Schmutz, Annette Audigé, Maria Grünberg, Kevin Steiner, Jon Huder, Cyril Shah, Riccarda Capaul, Guido Bloemberg, Jürg Böni, Michael Huber, Alexandra Trkola                                                                                                                                                                                                                                                     |  |
| EPI_ISL_2020904, EPI_ISL_2020905, EPI_ISL_2020906, EPI_ISL_2020907, EPI_ISL_2020908, EPI_ISL_2020909, EPI_ISL_2020910, EPI_ISL_2020911, EPI_ISL_2020912, EPI_ISL_2020913, EPI_ISL_2020914, EPI_ISL_2020915, EPI_ISL_2020916, EPI_ISL_2020917, EPI_ISL_2020918, EPI_ISL_2020919, EPI_ISL_2020920, EPI_ISL_2020921, EPI_ISL_2020922, EPI_ISL_2020923, EPI_ISL_2020924, EPI_ISL_2020925, EPI_ISL_2020926, EPI_ISL_2020927, EPI_ISL_2020928, EPI_ISL_2020929                                                                                                                                                                                                                                                                                                                                                                                                                                                                                                                                                                                                                                                                                                                                                                                                                                                                                                                                                                                                                                                                                                                                                                                                                                                                                                                                                                                                                                                                                                                                                                                                                                                                                                                                                                                                                                                                                                                                                                                                                                                                                                                                                                                                                                                                 |                                                                    |                                                                    |                                                                                                                                                                                                                                                                                                                                                                                                                                                                         |  |
| see above                                                                                                                                                                                                                                                                                                                                                                                                                                                                                                                                                                                                                                                                                                                                                                                                                                                                                                                                                                                                                                                                                                                                                                                                                                                                                                                                                                                                                                                                                                                                                                                                                                                                                                                                                                                                                                                                                                                                                                                                                                                                                                                                                                                                                                                                                                                                                                                                                                                                                                                                                                                                                                                                                                                | Viollier AG                                                        | Viollier AG                                                        | Andrea Patrizia Salzmann, Henriette Kurth, Christiane Beckmann, Maurice Redondo, Olivier Kobel, Christoph Noppen                                                                                                                                                                                                                                                                                                                                                        |  |
| EPI_ISL_2028280                                                                                                                                                                                                                                                                                                                                                                                                                                                                                                                                                                                                                                                                                                                                                                                                                                                                                                                                                                                                                                                                                                                                                                                                                                                                                                                                                                                                                                                                                                                                                                                                                                                                                                                                                                                                                                                                                                                                                                                                                                                                                                                                                                                                                                                                                                                                                                                                                                                                                                                                                                                                                                                                                                          | Laboratorio di Microbiologia                                       | Laboratorio di Microbiologia                                       | Martineti Lucchini Gladys, Valeria Spina                                                                                                                                                                                                                                                                                                                                                                                                                                |  |
| EPI_ISL_2035955, EPI_ISL_2080949, EPI_ISL_2080956                                                                                                                                                                                                                                                                                                                                                                                                                                                                                                                                                                                                                                                                                                                                                                                                                                                                                                                                                                                                                                                                                                                                                                                                                                                                                                                                                                                                                                                                                                                                                                                                                                                                                                                                                                                                                                                                                                                                                                                                                                                                                                                                                                                                                                                                                                                                                                                                                                                                                                                                                                                                                                                                        | Institute for Infectious Diseases, University of Bern, Switzerland | Institute for Infectious Diseases, University of Bern, Switzerland | Stefan Neuwandner, Christian Baumann, Miguel A Terrazos Miani, Cora Sägesser, Pascal Bittel, Peter Keller, Franziska Suter-Riniker, Stephen L Leib, Alban Ramette                                                                                                                                                                                                                                                                                                       |  |
| EPI_ISL_2086784, EPI_ISL_2086785, EPI_ISL_2086786, EPI_ISL_2086787, EPI_ISL_2086788, EPI_ISL_2086789, EPI_ISL_2086790, EPI_ISL_2086791, EPI_ISL_2086792, EPI_ISL_2086793, EPI_ISL_2086794, EPI_ISL_2086795, EPI_ISL_2086796, EPI_ISL_2086797, EPI_ISL_2086798, EPI_ISL_2086799, EPI_ISL_2086800, EPI_ISL_2086801, EPI_ISL_2086802, EPI_ISL_2086803, EPI_ISL_2086804, EPI_ISL_2086805, EPI_ISL_2086806, EPI_ISL_2086807, EPI_ISL_2086808, EPI_ISL_2086809, EPI_ISL_2086810, EPI_ISL_2086811                                                                                                                                                                                                                                                                                                                                                                                                                                                                                                                                                                                                                                                                                                                                                                                                                                                                                                                                                                                                                                                                                                                                                                                                                                                                                                                                                                                                                                                                                                                                                                                                                                                                                                                                                                                                                                                                                                                                                                                                                                                                                                                                                                                                                               |                                                                    |                                                                    |                                                                                                                                                                                                                                                                                                                                                                                                                                                                         |  |
| see above                                                                                                                                                                                                                                                                                                                                                                                                                                                                                                                                                                                                                                                                                                                                                                                                                                                                                                                                                                                                                                                                                                                                                                                                                                                                                                                                                                                                                                                                                                                                                                                                                                                                                                                                                                                                                                                                                                                                                                                                                                                                                                                                                                                                                                                                                                                                                                                                                                                                                                                                                                                                                                                                                                                | UniversitätsSpital Zürich                                          | Institute of Medical Virology                                      | Daniel Ehram, Isabel Stürmer, Catharine Aquino, Joel Wirz, Weihong Qi, Hubert Rehrauer, Verena Kufner, Gabriela Ziltener, Maryam Zaheri, Stefan Schmutz, Annette Audigé, Maria Grünberg, Kevin Steiner, Jon Huder, Cyril Shah, Riccarda Capaul, Guido Bloemberg, Jürg Böni, Michael Huber, Alexandra Trkola                                                                                                                                                             |  |
| EPI_ISL_2086812, EPI_ISL_2086813                                                                                                                                                                                                                                                                                                                                                                                                                                                                                                                                                                                                                                                                                                                                                                                                                                                                                                                                                                                                                                                                                                                                                                                                                                                                                                                                                                                                                                                                                                                                                                                                                                                                                                                                                                                                                                                                                                                                                                                                                                                                                                                                                                                                                                                                                                                                                                                                                                                                                                                                                                                                                                                                                         | Spital Männedorf AG                                                | Institute of Medical Virology                                      | Daniel Ehram, Isabel Stürmer, Catharine Aquino, Joel Wirz, Weihong Qi, Hubert Rehrauer, Verena Kufner, Gabriela Ziltener, Maryam Zaheri, Stefan Schmutz, Annette Audigé, Maria Grünberg, Kevin Steiner, Jon Huder, Cyril Shah, Riccarda Capaul, Guido Bloemberg, Jürg Böni, Michael Huber, Alexandra Trkola                                                                                                                                                             |  |
| EPI_ISL_2086814, EPI_ISL_2086815,                                                                                                                                                                                                                                                                                                                                                                                                                                                                                                                                                                                                                                                                                                                                                                                                                                                                                                                                                                                                                                                                                                                                                                                                                                                                                                                                                                                                                                                                                                                                                                                                                                                                                                                                                                                                                                                                                                                                                                                                                                                                                                                                                                                                                                                                                                                                                                                                                                                                                                                                                                                                                                                                                        | UniversitätsSpital Zürich                                          | Institute of Medical Virology                                      | Daniel Ehram, Isabel Stürmer, Catharine Aquino, Joel Wirz, Weihong Qi, Hubert Rehrauer, Verena Kufner, Gabriela Ziltener, Maryam Zaheri, Stefan                                                                                                                                                                                                                                                                                                                         |  |





|                                                                                                                                                                                                                                                                                |                                                        |                                                                                                        |                                                                                                                                                                                                          |
|--------------------------------------------------------------------------------------------------------------------------------------------------------------------------------------------------------------------------------------------------------------------------------|--------------------------------------------------------|--------------------------------------------------------------------------------------------------------|----------------------------------------------------------------------------------------------------------------------------------------------------------------------------------------------------------|
| EPI_ISL_2104493, EPI_ISL_2104494, EPI_ISL_2104495, EPI_ISL_2104496, EPI_ISL_2104497, EPI_ISL_2104498, EPI_ISL_2104499, EPI_ISL_2104500, EPI_ISL_2104501, EPI_ISL_2104502, EPI_ISL_2104504, EPI_ISL_2104631, EPI_ISL_2104664, EPI_ISL_2104665, EPI_ISL_2104666, EPI_ISL_2104720 |                                                        |                                                                                                        |                                                                                                                                                                                                          |
| see above                                                                                                                                                                                                                                                                      | University Hospitals of Geneva, Laboratory of Virology | HUG, Laboratory of Virology and the Health2030 Genome Center                                           | Samuel Cordey, Ana Rita Goncalves, Laurent Kaiser, Lorenzo Cerutti, Henri Pegeot, Melyssa Elies, Deborah Penet, Keith Harshman, Ioannis Xenarios, Emmanouil Dermitzakis                                  |
| EPI_ISL_2110424, EPI_ISL_2110425                                                                                                                                                                                                                                               | Liebefeld, Switzerland                                 | University Hospital Basel, Switzerland                                                                 | Tim Roloff, Madlen Stange, Helena MB Seth-Smith, Alfredo Mari, Karoline Leuzinger, Julia Bielicki, Nadia Wohlwend, Martin Risch, Lorenz Risch, Manuel Battegay, Hans Hirsch, Adrian Egli                 |
| EPI_ISL_2134848                                                                                                                                                                                                                                                                | Viollier AG                                            | Viollier AG                                                                                            | Andrea Patrizia Salzmann, Henriette Kurth, Christiane Beckmann, Maurice Redondo, Olivier Kobel, Christoph Noppen                                                                                         |
| EPI_ISL_2137181, EPI_ISL_2137182, EPI_ISL_2137183                                                                                                                                                                                                                              | Department of Microbiology, University Innsbruck       | Bergthaler laboratory, CeMM Research Center for Molecular Medicine of the Austrian Academy of Sciences | Lukas Endler, Anna Schedl, Fabian Amman, Petr Triska, Thomas Penz, Benedikt Agerer, Maelle Le Moing, Michael Schuster, Bekir Erguner, Jan Laine, Martin Senekowitsch, Christoph Bock, Andreas Bergthaler |
| EPI_ISL_2137385, EPI_ISL_2137386, EPI_ISL_2137387, EPI_ISL_2137388, EPI_ISL_2137390, EPI_ISL_2137391, EPI_ISL_2137393, EPI_ISL_2137394                                                                                                                                         | CHUV                                                   | Laboratory of genomics and metagenomics                                                                | Trestan Pilonel, Damien Jacot, Sébastien Aeby, Gilbert Greub, Claire Bertelli                                                                                                                            |
| EPI_ISL_2137395                                                                                                                                                                                                                                                                | EHC MORGES                                             | Laboratory of genomics and metagenomics                                                                | Trestan Pilonel, Damien Jacot, Sébastien Aeby, Gilbert Greub, Claire Bertelli                                                                                                                            |
| EPI_ISL_2137396, EPI_ISL_2137397, EPI_ISL_2137398                                                                                                                                                                                                                              | CHUV                                                   | Laboratory of genomics and metagenomics                                                                | Trestan Pilonel, Damien Jacot, Sébastien Aeby, Gilbert Greub, Claire Bertelli                                                                                                                            |
| EPI_ISL_2153443                                                                                                                                                                                                                                                                | Institute for Infectious Diseases, University of Bern  | Institute for Infectious Diseases, University of Bern                                                  | Stefan Neuenschwander, Christian Baumann, Miguel A Terrazos Miani, Cora Sägesser, Pascal Bittel, Peter Keller, Franziska Suter-Riniker, Stephen L Leib, Alban Ramette                                    |

We gratefully acknowledge the following Authors from the Originating laboratories responsible for obtaining the specimens, as well as the Submitting laboratories where the genome data were generated and shared via GISAID, on which this research is based.

All Submitters of data may be contacted directly via [www.gisaid.org](http://www.gisaid.org)

Authors are sorted alphabetically.

| Accession ID                                                                                                                                                                                                                                                                                                                                                                                                                                                                                                                                                                                                                                                                                                                                                                                                                                                                                                                                                                                                                                                                                                                                                                                                                                                                            | Originating Laboratory          | Submitting Laboratory                                              | Authors                                                                                                                                                                                                             |                                                                                                                                                                       |
|-----------------------------------------------------------------------------------------------------------------------------------------------------------------------------------------------------------------------------------------------------------------------------------------------------------------------------------------------------------------------------------------------------------------------------------------------------------------------------------------------------------------------------------------------------------------------------------------------------------------------------------------------------------------------------------------------------------------------------------------------------------------------------------------------------------------------------------------------------------------------------------------------------------------------------------------------------------------------------------------------------------------------------------------------------------------------------------------------------------------------------------------------------------------------------------------------------------------------------------------------------------------------------------------|---------------------------------|--------------------------------------------------------------------|---------------------------------------------------------------------------------------------------------------------------------------------------------------------------------------------------------------------|-----------------------------------------------------------------------------------------------------------------------------------------------------------------------|
| EPI_ISL_1939285, EPI_ISL_1939286, EPI_ISL_1939287, EPI_ISL_1939288, EPI_ISL_1939289, EPI_ISL_1939290                                                                                                                                                                                                                                                                                                                                                                                                                                                                                                                                                                                                                                                                                                                                                                                                                                                                                                                                                                                                                                                                                                                                                                                    | Center for Laboratory Medicine  | Center for Laboratory Medicine                                     | Yannick Gerth                                                                                                                                                                                                       |                                                                                                                                                                       |
| EPI_ISL_1941664, EPI_ISL_1941666, EPI_ISL_1941670, EPI_ISL_1941672, EPI_ISL_1941674, EPI_ISL_1941675, EPI_ISL_1941676, EPI_ISL_1941679, EPI_ISL_1941684, EPI_ISL_1941693, EPI_ISL_1941698, EPI_ISL_1941700, EPI_ISL_1941755, EPI_ISL_1941757, EPI_ISL_1941759                                                                                                                                                                                                                                                                                                                                                                                                                                                                                                                                                                                                                                                                                                                                                                                                                                                                                                                                                                                                                           | see above                       | CHUV                                                               | Laboratory of genomics and metagenomics                                                                                                                                                                             |                                                                                                                                                                       |
| EPI_ISL_1993780, EPI_ISL_1993781, EPI_ISL_1993782, EPI_ISL_1993783, EPI_ISL_1993784, EPI_ISL_1993785, EPI_ISL_1993786, EPI_ISL_1993787, EPI_ISL_1993788, EPI_ISL_1993789, EPI_ISL_1993790, EPI_ISL_1993791, EPI_ISL_1993792, EPI_ISL_1993794, EPI_ISL_1993795, EPI_ISL_1993796, EPI_ISL_1993797, EPI_ISL_1993798, EPI_ISL_1993799, EPI_ISL_1993800, EPI_ISL_1993801, EPI_ISL_1993802, EPI_ISL_1993803, EPI_ISL_1993804, EPI_ISL_1993805, EPI_ISL_1993806, EPI_ISL_1993810                                                                                                                                                                                                                                                                                                                                                                                                                                                                                                                                                                                                                                                                                                                                                                                                               | see above                       | Laboratorio di Microbiologia                                       | Martinetti Lucchini Gladys, Valeria Spina                                                                                                                                                                           |                                                                                                                                                                       |
| EPI_ISL_1993841, EPI_ISL_1993842, EPI_ISL_1993843, EPI_ISL_1993844, EPI_ISL_1993845, EPI_ISL_1993846, EPI_ISL_1993847, EPI_ISL_1993848, EPI_ISL_1993849, EPI_ISL_1993850, EPI_ISL_1993851, EPI_ISL_1993852, EPI_ISL_1993853, EPI_ISL_1993854, EPI_ISL_1993855, EPI_ISL_1993856, EPI_ISL_1993857, EPI_ISL_1993858, EPI_ISL_1993859, EPI_ISL_1993860, EPI_ISL_1993861, EPI_ISL_1993862, EPI_ISL_1993863, EPI_ISL_1993864                                                                                                                                                                                                                                                                                                                                                                                                                                                                                                                                                                                                                                                                                                                                                                                                                                                                  | see above                       | Clinical Virology                                                  | Clinical Bacteriology                                                                                                                                                                                               |                                                                                                                                                                       |
| EPI_ISL_1993934, EPI_ISL_1993941                                                                                                                                                                                                                                                                                                                                                                                                                                                                                                                                                                                                                                                                                                                                                                                                                                                                                                                                                                                                                                                                                                                                                                                                                                                        | Felix-Platter Spital            | Clinical Bacteriology                                              | Tim Roloff, Madlen Stange, Helena MB Seth-Smith, Alfredo Mari, Karoline Leuzinger, Julia Bielicki, Manuel Battegay, Hans Hirsch, Adrian Egli                                                                        |                                                                                                                                                                       |
| EPI_ISL_1993943, EPI_ISL_1993946, EPI_ISL_1993951                                                                                                                                                                                                                                                                                                                                                                                                                                                                                                                                                                                                                                                                                                                                                                                                                                                                                                                                                                                                                                                                                                                                                                                                                                       | Labor Team W Ag                 | Clinical Bacteriology                                              | Tim Roloff, Madlen Stange, Helena MB Seth-Smith, Alfredo Mari, Karoline Leuzinger, Julia Bielicki, Manuel Battegay, Hans Hirsch, Adrian Egli                                                                        |                                                                                                                                                                       |
| EPI_ISL_2000634, EPI_ISL_2000637, EPI_ISL_2000662, EPI_ISL_2000663, EPI_ISL_2000664                                                                                                                                                                                                                                                                                                                                                                                                                                                                                                                                                                                                                                                                                                                                                                                                                                                                                                                                                                                                                                                                                                                                                                                                     | Viollier AG                     | Viollier AG                                                        | Andrea Patrizia Salzmann, Henriette Kurth, Christiane Beckmann, Maurice Redondo, Olivier Kobel, Christoph Noppen                                                                                                    |                                                                                                                                                                       |
| EPI_ISL_2020331, EPI_ISL_2020334                                                                                                                                                                                                                                                                                                                                                                                                                                                                                                                                                                                                                                                                                                                                                                                                                                                                                                                                                                                                                                                                                                                                                                                                                                                        | UniversitätsSpital Zürich       | Institute of Medical Virology                                      | Verena Kufner, Gabriela Ziltener, Maryam Zaheri, Stefan Schmutz, Annette Audigé, Maria Grünberg, Kevin Steiner, Jon Huder, Cyril Shah, Riccarda Capaul, Guido Bloemberg, Jürg Böni, Michael Huber, Alexandra Trkola |                                                                                                                                                                       |
| EPI_ISL_2020335, EPI_ISL_2020336                                                                                                                                                                                                                                                                                                                                                                                                                                                                                                                                                                                                                                                                                                                                                                                                                                                                                                                                                                                                                                                                                                                                                                                                                                                        | Kantonsspital Winterthur        | Institute of Medical Virology                                      | Verena Kufner, Gabriela Ziltener, Maryam Zaheri, Stefan Schmutz, Annette Audigé, Maria Grünberg, Kevin Steiner, Jon Huder, Cyril Shah, Riccarda Capaul, Guido Bloemberg, Jürg Böni, Michael Huber, Alexandra Trkola |                                                                                                                                                                       |
| EPI_ISL_2020337, EPI_ISL_2020341, EPI_ISL_2020345                                                                                                                                                                                                                                                                                                                                                                                                                                                                                                                                                                                                                                                                                                                                                                                                                                                                                                                                                                                                                                                                                                                                                                                                                                       | UniversitätsSpital Zürich       | Institute of Medical Virology                                      | Verena Kufner, Gabriela Ziltener, Maryam Zaheri, Stefan Schmutz, Annette Audigé, Maria Grünberg, Kevin Steiner, Jon Huder, Cyril Shah, Riccarda Capaul, Guido Bloemberg, Jürg Böni, Michael Huber, Alexandra Trkola |                                                                                                                                                                       |
| EPI_ISL_2020346                                                                                                                                                                                                                                                                                                                                                                                                                                                                                                                                                                                                                                                                                                                                                                                                                                                                                                                                                                                                                                                                                                                                                                                                                                                                         | UniversitätsSpital Zürich 225   | Institute of Medical Virology                                      | Verena Kufner, Gabriela Ziltener, Maryam Zaheri, Stefan Schmutz, Annette Audigé, Maria Grünberg, Kevin Steiner, Jon Huder, Cyril Shah, Riccarda Capaul, Guido Bloemberg, Jürg Böni, Michael Huber, Alexandra Trkola |                                                                                                                                                                       |
| EPI_ISL_2020347, EPI_ISL_2020348                                                                                                                                                                                                                                                                                                                                                                                                                                                                                                                                                                                                                                                                                                                                                                                                                                                                                                                                                                                                                                                                                                                                                                                                                                                        | UniversitätsSpital Zürich 009   | Institute of Medical Virology                                      | Verena Kufner, Gabriela Ziltener, Maryam Zaheri, Stefan Schmutz, Annette Audigé, Maria Grünberg, Kevin Steiner, Jon Huder, Cyril Shah, Riccarda Capaul, Guido Bloemberg, Jürg Böni, Michael Huber, Alexandra Trkola |                                                                                                                                                                       |
| EPI_ISL_2020349                                                                                                                                                                                                                                                                                                                                                                                                                                                                                                                                                                                                                                                                                                                                                                                                                                                                                                                                                                                                                                                                                                                                                                                                                                                                         | UniversitätsSpital Zürich 064.3 | Institute of Medical Virology                                      | Verena Kufner, Gabriela Ziltener, Maryam Zaheri, Stefan Schmutz, Annette Audigé, Maria Grünberg, Kevin Steiner, Jon Huder, Cyril Shah, Riccarda Capaul, Guido Bloemberg, Jürg Böni, Michael Huber, Alexandra Trkola |                                                                                                                                                                       |
| EPI_ISL_2020350                                                                                                                                                                                                                                                                                                                                                                                                                                                                                                                                                                                                                                                                                                                                                                                                                                                                                                                                                                                                                                                                                                                                                                                                                                                                         | UniversitätsSpital Zürich       | Institute of Medical Virology                                      | Verena Kufner, Gabriela Ziltener, Maryam Zaheri, Stefan Schmutz, Annette Audigé, Maria Grünberg, Kevin Steiner, Jon Huder, Cyril Shah, Riccarda Capaul, Guido Bloemberg, Jürg Böni, Michael Huber, Alexandra Trkola |                                                                                                                                                                       |
| EPI_ISL_2020351                                                                                                                                                                                                                                                                                                                                                                                                                                                                                                                                                                                                                                                                                                                                                                                                                                                                                                                                                                                                                                                                                                                                                                                                                                                                         | UniversitätsSpital Zürich 009   | Institute of Medical Virology                                      | Verena Kufner, Gabriela Ziltener, Maryam Zaheri, Stefan Schmutz, Annette Audigé, Maria Grünberg, Kevin Steiner, Jon Huder, Cyril Shah, Riccarda Capaul, Guido Bloemberg, Jürg Böni, Michael Huber, Alexandra Trkola |                                                                                                                                                                       |
| EPI_ISL_2020352                                                                                                                                                                                                                                                                                                                                                                                                                                                                                                                                                                                                                                                                                                                                                                                                                                                                                                                                                                                                                                                                                                                                                                                                                                                                         | UniversitätsSpital Zürich 064.3 | Institute of Medical Virology                                      | Verena Kufner, Gabriela Ziltener, Maryam Zaheri, Stefan Schmutz, Annette Audigé, Maria Grünberg, Kevin Steiner, Jon Huder, Cyril Shah, Riccarda Capaul, Guido Bloemberg, Jürg Böni, Michael Huber, Alexandra Trkola |                                                                                                                                                                       |
| EPI_ISL_2020354, EPI_ISL_2020357                                                                                                                                                                                                                                                                                                                                                                                                                                                                                                                                                                                                                                                                                                                                                                                                                                                                                                                                                                                                                                                                                                                                                                                                                                                        | Spital Limmattal                | Institute of Medical Virology                                      | Verena Kufner, Gabriela Ziltener, Maryam Zaheri, Stefan Schmutz, Annette Audigé, Maria Grünberg, Kevin Steiner, Jon Huder, Cyril Shah, Riccarda Capaul, Guido Bloemberg, Jürg Böni, Michael Huber, Alexandra Trkola |                                                                                                                                                                       |
| EPI_ISL_2020925                                                                                                                                                                                                                                                                                                                                                                                                                                                                                                                                                                                                                                                                                                                                                                                                                                                                                                                                                                                                                                                                                                                                                                                                                                                                         | Viollier AG                     | Viollier AG                                                        | Andrea Patrizia Salzmann, Henriette Kurth, Christiane Beckmann, Maurice Redondo, Olivier Kobel, Christoph Noppen                                                                                                    |                                                                                                                                                                       |
| EPI_ISL_2035950, EPI_ISL_2035951, EPI_ISL_2035952, EPI_ISL_2035953, EPI_ISL_2035954, EPI_ISL_2035956, EPI_ISL_2035957, EPI_ISL_2035958, EPI_ISL_2035959, EPI_ISL_2035960, EPI_ISL_2035961, EPI_ISL_2035962, EPI_ISL_2035963, EPI_ISL_2035964, EPI_ISL_2035965, EPI_ISL_2035966, EPI_ISL_2035967, EPI_ISL_2035968, EPI_ISL_2035969, EPI_ISL_2035970, EPI_ISL_2035971, EPI_ISL_2035972, EPI_ISL_2035973, EPI_ISL_2035974, EPI_ISL_2035975, EPI_ISL_2035976, EPI_ISL_2035977, EPI_ISL_2035978, EPI_ISL_2035979, EPI_ISL_2035980, EPI_ISL_2035981, EPI_ISL_2035982, EPI_ISL_2035983, EPI_ISL_2035984, EPI_ISL_2035985, EPI_ISL_2035986, EPI_ISL_2080936, EPI_ISL_2080937, EPI_ISL_2080938, EPI_ISL_2080939, EPI_ISL_2080940, EPI_ISL_2080941, EPI_ISL_2080942, EPI_ISL_2080943, EPI_ISL_2080944, EPI_ISL_2080945, EPI_ISL_2080946, EPI_ISL_2080947, EPI_ISL_2080948, EPI_ISL_2080949, EPI_ISL_2080950, EPI_ISL_2080951, EPI_ISL_2080952, EPI_ISL_2080953, EPI_ISL_2080954, EPI_ISL_2080955, EPI_ISL_2080956, EPI_ISL_2080957, EPI_ISL_2080958, EPI_ISL_2080959, EPI_ISL_2080960, EPI_ISL_2080961, EPI_ISL_2080962, EPI_ISL_2080963, EPI_ISL_2080964, EPI_ISL_2080965, EPI_ISL_2080966, EPI_ISL_2080967, EPI_ISL_2080968, EPI_ISL_2080969, EPI_ISL_2080970, EPI_ISL_2080971, EPI_ISL_2080972 | see above                       | Institute for Infectious Diseases, University of Bern, Switzerland | Institute for Infectious Diseases, University of Bern, Switzerland                                                                                                                                                  | Stefan Neuenschwander, Christian Baumann, Miguel A Terrazos Miani, Cora Sägesser, Pascal Bittel, Peter Keller, Franziska Suter-Riniker, Stephen L Leib, Alban Ramette |
| EPI_ISL_2086717, EPI_ISL_2086718, EPI_ISL_2086719, EPI_ISL_2086720, EPI_ISL_2086721, EPI_ISL_2086722, EPI_ISL_2086723, EPI_ISL_2086724, EPI_ISL_2086725, EPI_ISL_2086726, EPI_ISL_2086727, EPI_ISL_2086728, EPI_ISL_2086729, EPI_ISL_2086730, EPI_ISL_2086731, EPI_ISL_2086732, EPI_ISL_2086733, EPI_ISL_2086734, EPI_ISL_2086735, EPI_ISL_2086736, EPI_ISL_2086737, EPI_ISL_2086738, EPI_ISL_2086739, EPI_ISL_2086740, EPI_ISL_2086741, EPI_ISL_2086742, EPI_ISL_2086743, EPI_ISL_2086744, EPI_ISL_2086745, EPI_ISL_2086746, EPI_ISL_2086747, EPI_ISL_2086748, EPI_ISL_2086749, EPI_ISL_2086750, EPI_ISL_2086751, EPI_ISL_2086752, EPI_ISL_2086753, EPI_ISL_2086754, EPI_ISL_2086755, EPI_ISL_2086756, EPI_ISL_2086757, EPI_ISL_2086758, EPI_ISL_2086759, EPI_ISL_2086760, EPI_ISL_2086761, EPI_ISL_2086762                                                                                                                                                                                                                                                                                                                                                                                                                                                                            | see above                       | Center for Laboratory Medicine                                     | Center for Laboratory Medicine                                                                                                                                                                                      | Yannick Gerth                                                                                                                                                         |
| EPI_ISL_2102091, EPI_ISL_2102092, EPI_ISL_2102093, EPI_ISL_2102094, EPI_ISL_2102095, EPI_ISL_2102096, EPI_ISL_2102097, EPI_ISL_2102098, EPI_ISL_2102099, EPI_ISL_2102100, EPI_ISL_2102101, EPI_ISL_2102102, EPI_ISL_2102103, EPI_ISL_2102104, EPI_ISL_2102105, EPI_ISL_2102106, EPI_ISL_2102107, EPI_ISL_2102108, EPI_ISL_2102109                                                                                                                                                                                                                                                                                                                                                                                                                                                                                                                                                                                                                                                                                                                                                                                                                                                                                                                                                       | see above                       | Clinical Virology                                                  | Clinical Bacteriology                                                                                                                                                                                               | Tim Roloff, Madlen Stange, Helena MB Seth-Smith, Alfredo Mari, Karoline Leuzinger, Julia Bielicki, Manuel Battegay, Hans Hirsch, Adrian Egli                          |
| EPI_ISL_2102110                                                                                                                                                                                                                                                                                                                                                                                                                                                                                                                                                                                                                                                                                                                                                                                                                                                                                                                                                                                                                                                                                                                                                                                                                                                                         | Labor Team W Ag                 | Clinical Bacteriology                                              | Tim Roloff, Madlen Stange, Helena MB Seth-Smith, Alfredo Mari, Karoline Leuzinger, Julia Bielicki, Manuel Battegay, Hans Hirsch, Adrian Egli                                                                        |                                                                                                                                                                       |
| EPI_ISL_2102112, EPI_ISL_2102113                                                                                                                                                                                                                                                                                                                                                                                                                                                                                                                                                                                                                                                                                                                                                                                                                                                                                                                                                                                                                                                                                                                                                                                                                                                        | Synlab Suisse SA                | Clinical Bacteriology                                              | Tim Roloff, Madlen Stange, Helena MB Seth-Smith, Alfredo Mari, Karoline Leuzinger, Julia Bielicki, Manuel Battegay, Hans Hirsch, Adrian Egli                                                                        |                                                                                                                                                                       |
| EPI_ISL_2102119, EPI_ISL_2102120                                                                                                                                                                                                                                                                                                                                                                                                                                                                                                                                                                                                                                                                                                                                                                                                                                                                                                                                                                                                                                                                                                                                                                                                                                                        | Clinical Virology               | Clinical Bacteriology                                              | Tim Roloff, Madlen Stange, Helena MB Seth-Smith, Alfredo Mari, Karoline Leuzinger, Julia Bielicki, Manuel Battegay, Hans Hirsch, Adrian Egli                                                                        |                                                                                                                                                                       |
| EPI_ISL_2102127, EPI_ISL_2102128                                                                                                                                                                                                                                                                                                                                                                                                                                                                                                                                                                                                                                                                                                                                                                                                                                                                                                                                                                                                                                                                                                                                                                                                                                                        | CHUV                            | Laboratory of genomics and metagenomics                            | Trestan Pillonel, Damien Jacot, Sébastien Aebly, Gilbert Greub, Claire Bertelli                                                                                                                                     |                                                                                                                                                                       |
| EPI_ISL_2102129                                                                                                                                                                                                                                                                                                                                                                                                                                                                                                                                                                                                                                                                                                                                                                                                                                                                                                                                                                                                                                                                                                                                                                                                                                                                         | EHNH                            | Laboratory of genomics and metagenomics                            | Trestan Pillonel, Damien Jacot, Sébastien Aebly, Gilbert Greub, Claire Bertelli                                                                                                                                     |                                                                                                                                                                       |
| EPI_ISL_2102130, EPI_ISL_2102131                                                                                                                                                                                                                                                                                                                                                                                                                                                                                                                                                                                                                                                                                                                                                                                                                                                                                                                                                                                                                                                                                                                                                                                                                                                        | CHUV                            | Laboratory of genomics and metagenomics                            | Trestan Pillonel, Damien Jacot, Sébastien Aebly, Gilbert Greub, Claire Bertelli                                                                                                                                     |                                                                                                                                                                       |
| EPI_ISL_2102132                                                                                                                                                                                                                                                                                                                                                                                                                                                                                                                                                                                                                                                                                                                                                                                                                                                                                                                                                                                                                                                                                                                                                                                                                                                                         | EHNH                            | Laboratory of genomics and metagenomics                            | Trestan Pillonel, Damien Jacot, Sébastien Aebly, Gilbert Greub, Claire Bertelli                                                                                                                                     |                                                                                                                                                                       |



|                                                                                                                                                                                                                                                                                                                                                                                                                                                                                                                                                                                                                                                                                                                                                                                                                                                                                                                                                                                                                                                                                                                                                                                                                                                                                                                                                                                                                                                                                                                                                                                                                                                                                                                                                                                                                                                                                                                                                                                                                                                                                                                                                                                                                                                                                                                                                                                                                                                                                                                                                                                                                                                                                                                                                                                                                                                                                                                                                                                                                                                                                                                                                                                                                                                                                                                                                                                                                                                                                                                                                                                                                                                                                                                                                                                                                                                                                                                                                                                                                                                                                                                                                                                                                                                                                                                                                                                                                                                                                                                                                                                                                                                                                                                                                                                                                                                                                                                                                                                                                                                                                                                                                                                                                                                                                                                                                                                                                                                                                                                                                                                                                                                                                                                                                                                                                                                                                                                                                                                                                                                                                                                                                                                                                                                                                                                                                                                                                                                                                                                                                                                                                                                                                                                                                                                                                                                                                                                                                                                                                                                                                                                                                                                                                                                                                                                                                                                                                                                                                                                                                                                                                                                                                                                                                                                                                                                                                                                      |                     |                                                       |                                                                                                                                                                                                                                                                                                             |                                                                                                                                                                                                                                                                                                                                                                                                                                                                                                       |
|----------------------------------------------------------------------------------------------------------------------------------------------------------------------------------------------------------------------------------------------------------------------------------------------------------------------------------------------------------------------------------------------------------------------------------------------------------------------------------------------------------------------------------------------------------------------------------------------------------------------------------------------------------------------------------------------------------------------------------------------------------------------------------------------------------------------------------------------------------------------------------------------------------------------------------------------------------------------------------------------------------------------------------------------------------------------------------------------------------------------------------------------------------------------------------------------------------------------------------------------------------------------------------------------------------------------------------------------------------------------------------------------------------------------------------------------------------------------------------------------------------------------------------------------------------------------------------------------------------------------------------------------------------------------------------------------------------------------------------------------------------------------------------------------------------------------------------------------------------------------------------------------------------------------------------------------------------------------------------------------------------------------------------------------------------------------------------------------------------------------------------------------------------------------------------------------------------------------------------------------------------------------------------------------------------------------------------------------------------------------------------------------------------------------------------------------------------------------------------------------------------------------------------------------------------------------------------------------------------------------------------------------------------------------------------------------------------------------------------------------------------------------------------------------------------------------------------------------------------------------------------------------------------------------------------------------------------------------------------------------------------------------------------------------------------------------------------------------------------------------------------------------------------------------------------------------------------------------------------------------------------------------------------------------------------------------------------------------------------------------------------------------------------------------------------------------------------------------------------------------------------------------------------------------------------------------------------------------------------------------------------------------------------------------------------------------------------------------------------------------------------------------------------------------------------------------------------------------------------------------------------------------------------------------------------------------------------------------------------------------------------------------------------------------------------------------------------------------------------------------------------------------------------------------------------------------------------------------------------------------------------------------------------------------------------------------------------------------------------------------------------------------------------------------------------------------------------------------------------------------------------------------------------------------------------------------------------------------------------------------------------------------------------------------------------------------------------------------------------------------------------------------------------------------------------------------------------------------------------------------------------------------------------------------------------------------------------------------------------------------------------------------------------------------------------------------------------------------------------------------------------------------------------------------------------------------------------------------------------------------------------------------------------------------------------------------------------------------------------------------------------------------------------------------------------------------------------------------------------------------------------------------------------------------------------------------------------------------------------------------------------------------------------------------------------------------------------------------------------------------------------------------------------------------------------------------------------------------------------------------------------------------------------------------------------------------------------------------------------------------------------------------------------------------------------------------------------------------------------------------------------------------------------------------------------------------------------------------------------------------------------------------------------------------------------------------------------------------------------------------------------------------------------------------------------------------------------------------------------------------------------------------------------------------------------------------------------------------------------------------------------------------------------------------------------------------------------------------------------------------------------------------------------------------------------------------------------------------------------------------------------------------------------------------------------------------------------------------------------------------------------------------------------------------------------------------------------------------------------------------------------------------------------------------------------------------------------------------------------------------------------------------------------------------------------------------------------------------------------------------------------------------------------------------------------------------------------------------------------------------------------------------------------------------------------------------------------------------------------------------------------------------------------------------------------------------------------------------------------------------------------------------------------------------------------------------------------------------------------------------------------------------------------------------|---------------------|-------------------------------------------------------|-------------------------------------------------------------------------------------------------------------------------------------------------------------------------------------------------------------------------------------------------------------------------------------------------------------|-------------------------------------------------------------------------------------------------------------------------------------------------------------------------------------------------------------------------------------------------------------------------------------------------------------------------------------------------------------------------------------------------------------------------------------------------------------------------------------------------------|
|                                                                                                                                                                                                                                                                                                                                                                                                                                                                                                                                                                                                                                                                                                                                                                                                                                                                                                                                                                                                                                                                                                                                                                                                                                                                                                                                                                                                                                                                                                                                                                                                                                                                                                                                                                                                                                                                                                                                                                                                                                                                                                                                                                                                                                                                                                                                                                                                                                                                                                                                                                                                                                                                                                                                                                                                                                                                                                                                                                                                                                                                                                                                                                                                                                                                                                                                                                                                                                                                                                                                                                                                                                                                                                                                                                                                                                                                                                                                                                                                                                                                                                                                                                                                                                                                                                                                                                                                                                                                                                                                                                                                                                                                                                                                                                                                                                                                                                                                                                                                                                                                                                                                                                                                                                                                                                                                                                                                                                                                                                                                                                                                                                                                                                                                                                                                                                                                                                                                                                                                                                                                                                                                                                                                                                                                                                                                                                                                                                                                                                                                                                                                                                                                                                                                                                                                                                                                                                                                                                                                                                                                                                                                                                                                                                                                                                                                                                                                                                                                                                                                                                                                                                                                                                                                                                                                                                                                                                                      |                     |                                                       | Alexandra Trkola                                                                                                                                                                                                                                                                                            |                                                                                                                                                                                                                                                                                                                                                                                                                                                                                                       |
| EPI_ISL_2137001, EPI_ISL_2137002, EPI_ISL_2137003, EPI_ISL_2137004                                                                                                                                                                                                                                                                                                                                                                                                                                                                                                                                                                                                                                                                                                                                                                                                                                                                                                                                                                                                                                                                                                                                                                                                                                                                                                                                                                                                                                                                                                                                                                                                                                                                                                                                                                                                                                                                                                                                                                                                                                                                                                                                                                                                                                                                                                                                                                                                                                                                                                                                                                                                                                                                                                                                                                                                                                                                                                                                                                                                                                                                                                                                                                                                                                                                                                                                                                                                                                                                                                                                                                                                                                                                                                                                                                                                                                                                                                                                                                                                                                                                                                                                                                                                                                                                                                                                                                                                                                                                                                                                                                                                                                                                                                                                                                                                                                                                                                                                                                                                                                                                                                                                                                                                                                                                                                                                                                                                                                                                                                                                                                                                                                                                                                                                                                                                                                                                                                                                                                                                                                                                                                                                                                                                                                                                                                                                                                                                                                                                                                                                                                                                                                                                                                                                                                                                                                                                                                                                                                                                                                                                                                                                                                                                                                                                                                                                                                                                                                                                                                                                                                                                                                                                                                                                                                                                                                                   | Spital Männedorf AG | Institute of Medical Virology                         | Daniel Ehram, Isabel Stürmer, Catharine Aquino, Joel Wirz, Weihong Qi, Hubert Rehrauer, Verena Kufner, Gabriela Ziltener, Maryam Zaheri, Stefan Schmutz, Annette Audigé, Maria Grünberg, Kevin Steiner, Jon Huder, Cyril Shah, Riccarda Capaul, Guido Bloemberg, Jürg Böni, Michael Huber, Alexandra Trkola |                                                                                                                                                                                                                                                                                                                                                                                                                                                                                                       |
| EPI_ISL_2137005, EPI_ISL_2137006, EPI_ISL_2137007                                                                                                                                                                                                                                                                                                                                                                                                                                                                                                                                                                                                                                                                                                                                                                                                                                                                                                                                                                                                                                                                                                                                                                                                                                                                                                                                                                                                                                                                                                                                                                                                                                                                                                                                                                                                                                                                                                                                                                                                                                                                                                                                                                                                                                                                                                                                                                                                                                                                                                                                                                                                                                                                                                                                                                                                                                                                                                                                                                                                                                                                                                                                                                                                                                                                                                                                                                                                                                                                                                                                                                                                                                                                                                                                                                                                                                                                                                                                                                                                                                                                                                                                                                                                                                                                                                                                                                                                                                                                                                                                                                                                                                                                                                                                                                                                                                                                                                                                                                                                                                                                                                                                                                                                                                                                                                                                                                                                                                                                                                                                                                                                                                                                                                                                                                                                                                                                                                                                                                                                                                                                                                                                                                                                                                                                                                                                                                                                                                                                                                                                                                                                                                                                                                                                                                                                                                                                                                                                                                                                                                                                                                                                                                                                                                                                                                                                                                                                                                                                                                                                                                                                                                                                                                                                                                                                                                                                    | Spital Limmattal    | Institute of Medical Virology                         | Daniel Ehram, Isabel Stürmer, Catharine Aquino, Joel Wirz, Weihong Qi, Hubert Rehrauer, Verena Kufner, Gabriela Ziltener, Maryam Zaheri, Stefan Schmutz, Annette Audigé, Maria Grünberg, Kevin Steiner, Jon Huder, Cyril Shah, Riccarda Capaul, Guido Bloemberg, Jürg Böni, Michael Huber, Alexandra Trkola |                                                                                                                                                                                                                                                                                                                                                                                                                                                                                                       |
| EPI_ISL_2137008, EPI_ISL_2137009                                                                                                                                                                                                                                                                                                                                                                                                                                                                                                                                                                                                                                                                                                                                                                                                                                                                                                                                                                                                                                                                                                                                                                                                                                                                                                                                                                                                                                                                                                                                                                                                                                                                                                                                                                                                                                                                                                                                                                                                                                                                                                                                                                                                                                                                                                                                                                                                                                                                                                                                                                                                                                                                                                                                                                                                                                                                                                                                                                                                                                                                                                                                                                                                                                                                                                                                                                                                                                                                                                                                                                                                                                                                                                                                                                                                                                                                                                                                                                                                                                                                                                                                                                                                                                                                                                                                                                                                                                                                                                                                                                                                                                                                                                                                                                                                                                                                                                                                                                                                                                                                                                                                                                                                                                                                                                                                                                                                                                                                                                                                                                                                                                                                                                                                                                                                                                                                                                                                                                                                                                                                                                                                                                                                                                                                                                                                                                                                                                                                                                                                                                                                                                                                                                                                                                                                                                                                                                                                                                                                                                                                                                                                                                                                                                                                                                                                                                                                                                                                                                                                                                                                                                                                                                                                                                                                                                                                                     | Spital Männedorf AG | Institute of Medical Virology                         | Daniel Ehram, Isabel Stürmer, Catharine Aquino, Joel Wirz, Weihong Qi, Hubert Rehrauer, Verena Kufner, Gabriela Ziltener, Maryam Zaheri, Stefan Schmutz, Annette Audigé, Maria Grünberg, Kevin Steiner, Jon Huder, Cyril Shah, Riccarda Capaul, Guido Bloemberg, Jürg Böni, Michael Huber, Alexandra Trkola |                                                                                                                                                                                                                                                                                                                                                                                                                                                                                                       |
| EPI_ISL_2137010                                                                                                                                                                                                                                                                                                                                                                                                                                                                                                                                                                                                                                                                                                                                                                                                                                                                                                                                                                                                                                                                                                                                                                                                                                                                                                                                                                                                                                                                                                                                                                                                                                                                                                                                                                                                                                                                                                                                                                                                                                                                                                                                                                                                                                                                                                                                                                                                                                                                                                                                                                                                                                                                                                                                                                                                                                                                                                                                                                                                                                                                                                                                                                                                                                                                                                                                                                                                                                                                                                                                                                                                                                                                                                                                                                                                                                                                                                                                                                                                                                                                                                                                                                                                                                                                                                                                                                                                                                                                                                                                                                                                                                                                                                                                                                                                                                                                                                                                                                                                                                                                                                                                                                                                                                                                                                                                                                                                                                                                                                                                                                                                                                                                                                                                                                                                                                                                                                                                                                                                                                                                                                                                                                                                                                                                                                                                                                                                                                                                                                                                                                                                                                                                                                                                                                                                                                                                                                                                                                                                                                                                                                                                                                                                                                                                                                                                                                                                                                                                                                                                                                                                                                                                                                                                                                                                                                                                                                      | Spital Limmattal    | Institute of Medical Virology                         | Daniel Ehram, Isabel Stürmer, Catharine Aquino, Joel Wirz, Weihong Qi, Hubert Rehrauer, Verena Kufner, Gabriela Ziltener, Maryam Zaheri, Stefan Schmutz, Annette Audigé, Maria Grünberg, Kevin Steiner, Jon Huder, Cyril Shah, Riccarda Capaul, Guido Bloemberg, Jürg Böni, Michael Huber, Alexandra Trkola |                                                                                                                                                                                                                                                                                                                                                                                                                                                                                                       |
| EPI_ISL_2137011, EPI_ISL_2137012, EPI_ISL_2137013, EPI_ISL_2137014                                                                                                                                                                                                                                                                                                                                                                                                                                                                                                                                                                                                                                                                                                                                                                                                                                                                                                                                                                                                                                                                                                                                                                                                                                                                                                                                                                                                                                                                                                                                                                                                                                                                                                                                                                                                                                                                                                                                                                                                                                                                                                                                                                                                                                                                                                                                                                                                                                                                                                                                                                                                                                                                                                                                                                                                                                                                                                                                                                                                                                                                                                                                                                                                                                                                                                                                                                                                                                                                                                                                                                                                                                                                                                                                                                                                                                                                                                                                                                                                                                                                                                                                                                                                                                                                                                                                                                                                                                                                                                                                                                                                                                                                                                                                                                                                                                                                                                                                                                                                                                                                                                                                                                                                                                                                                                                                                                                                                                                                                                                                                                                                                                                                                                                                                                                                                                                                                                                                                                                                                                                                                                                                                                                                                                                                                                                                                                                                                                                                                                                                                                                                                                                                                                                                                                                                                                                                                                                                                                                                                                                                                                                                                                                                                                                                                                                                                                                                                                                                                                                                                                                                                                                                                                                                                                                                                                                   | Spital Männedorf AG | Institute of Medical Virology                         | Daniel Ehram, Isabel Stürmer, Catharine Aquino, Joel Wirz, Weihong Qi, Hubert Rehrauer, Verena Kufner, Gabriela Ziltener, Maryam Zaheri, Stefan Schmutz, Annette Audigé, Maria Grünberg, Kevin Steiner, Jon Huder, Cyril Shah, Riccarda Capaul, Guido Bloemberg, Jürg Böni, Michael Huber, Alexandra Trkola |                                                                                                                                                                                                                                                                                                                                                                                                                                                                                                       |
| EPI_ISL_2137015                                                                                                                                                                                                                                                                                                                                                                                                                                                                                                                                                                                                                                                                                                                                                                                                                                                                                                                                                                                                                                                                                                                                                                                                                                                                                                                                                                                                                                                                                                                                                                                                                                                                                                                                                                                                                                                                                                                                                                                                                                                                                                                                                                                                                                                                                                                                                                                                                                                                                                                                                                                                                                                                                                                                                                                                                                                                                                                                                                                                                                                                                                                                                                                                                                                                                                                                                                                                                                                                                                                                                                                                                                                                                                                                                                                                                                                                                                                                                                                                                                                                                                                                                                                                                                                                                                                                                                                                                                                                                                                                                                                                                                                                                                                                                                                                                                                                                                                                                                                                                                                                                                                                                                                                                                                                                                                                                                                                                                                                                                                                                                                                                                                                                                                                                                                                                                                                                                                                                                                                                                                                                                                                                                                                                                                                                                                                                                                                                                                                                                                                                                                                                                                                                                                                                                                                                                                                                                                                                                                                                                                                                                                                                                                                                                                                                                                                                                                                                                                                                                                                                                                                                                                                                                                                                                                                                                                                                                      | Spital Limmattal    | Institute of Medical Virology                         | Daniel Ehram, Isabel Stürmer, Catharine Aquino, Joel Wirz, Weihong Qi, Hubert Rehrauer, Verena Kufner, Gabriela Ziltener, Maryam Zaheri, Stefan Schmutz, Annette Audigé, Maria Grünberg, Kevin Steiner, Jon Huder, Cyril Shah, Riccarda Capaul, Guido Bloemberg, Jürg Böni, Michael Huber, Alexandra Trkola |                                                                                                                                                                                                                                                                                                                                                                                                                                                                                                       |
| EPI_ISL_2137016, EPI_ISL_2137017, EPI_ISL_2137018, EPI_ISL_2137019                                                                                                                                                                                                                                                                                                                                                                                                                                                                                                                                                                                                                                                                                                                                                                                                                                                                                                                                                                                                                                                                                                                                                                                                                                                                                                                                                                                                                                                                                                                                                                                                                                                                                                                                                                                                                                                                                                                                                                                                                                                                                                                                                                                                                                                                                                                                                                                                                                                                                                                                                                                                                                                                                                                                                                                                                                                                                                                                                                                                                                                                                                                                                                                                                                                                                                                                                                                                                                                                                                                                                                                                                                                                                                                                                                                                                                                                                                                                                                                                                                                                                                                                                                                                                                                                                                                                                                                                                                                                                                                                                                                                                                                                                                                                                                                                                                                                                                                                                                                                                                                                                                                                                                                                                                                                                                                                                                                                                                                                                                                                                                                                                                                                                                                                                                                                                                                                                                                                                                                                                                                                                                                                                                                                                                                                                                                                                                                                                                                                                                                                                                                                                                                                                                                                                                                                                                                                                                                                                                                                                                                                                                                                                                                                                                                                                                                                                                                                                                                                                                                                                                                                                                                                                                                                                                                                                                                   | Spital Männedorf AG | Institute of Medical Virology                         | Daniel Ehram, Isabel Stürmer, Catharine Aquino, Joel Wirz, Weihong Qi, Hubert Rehrauer, Verena Kufner, Gabriela Ziltener, Maryam Zaheri, Stefan Schmutz, Annette Audigé, Maria Grünberg, Kevin Steiner, Jon Huder, Cyril Shah, Riccarda Capaul, Guido Bloemberg, Jürg Böni, Michael Huber, Alexandra Trkola |                                                                                                                                                                                                                                                                                                                                                                                                                                                                                                       |
| EPI_ISL_2137399, EPI_ISL_2137400, EPI_ISL_2137401, EPI_ISL_2137402, EPI_ISL_2137403, EPI_ISL_2137404                                                                                                                                                                                                                                                                                                                                                                                                                                                                                                                                                                                                                                                                                                                                                                                                                                                                                                                                                                                                                                                                                                                                                                                                                                                                                                                                                                                                                                                                                                                                                                                                                                                                                                                                                                                                                                                                                                                                                                                                                                                                                                                                                                                                                                                                                                                                                                                                                                                                                                                                                                                                                                                                                                                                                                                                                                                                                                                                                                                                                                                                                                                                                                                                                                                                                                                                                                                                                                                                                                                                                                                                                                                                                                                                                                                                                                                                                                                                                                                                                                                                                                                                                                                                                                                                                                                                                                                                                                                                                                                                                                                                                                                                                                                                                                                                                                                                                                                                                                                                                                                                                                                                                                                                                                                                                                                                                                                                                                                                                                                                                                                                                                                                                                                                                                                                                                                                                                                                                                                                                                                                                                                                                                                                                                                                                                                                                                                                                                                                                                                                                                                                                                                                                                                                                                                                                                                                                                                                                                                                                                                                                                                                                                                                                                                                                                                                                                                                                                                                                                                                                                                                                                                                                                                                                                                                                 | CHUV                | Laboratory of genomics and metagenomics               | Trestan Pillonel, Damien Jacot, Sébastien Aebly, Gilbert Greub, Claire Bertelli                                                                                                                                                                                                                             |                                                                                                                                                                                                                                                                                                                                                                                                                                                                                                       |
| EPI_ISL_2137405                                                                                                                                                                                                                                                                                                                                                                                                                                                                                                                                                                                                                                                                                                                                                                                                                                                                                                                                                                                                                                                                                                                                                                                                                                                                                                                                                                                                                                                                                                                                                                                                                                                                                                                                                                                                                                                                                                                                                                                                                                                                                                                                                                                                                                                                                                                                                                                                                                                                                                                                                                                                                                                                                                                                                                                                                                                                                                                                                                                                                                                                                                                                                                                                                                                                                                                                                                                                                                                                                                                                                                                                                                                                                                                                                                                                                                                                                                                                                                                                                                                                                                                                                                                                                                                                                                                                                                                                                                                                                                                                                                                                                                                                                                                                                                                                                                                                                                                                                                                                                                                                                                                                                                                                                                                                                                                                                                                                                                                                                                                                                                                                                                                                                                                                                                                                                                                                                                                                                                                                                                                                                                                                                                                                                                                                                                                                                                                                                                                                                                                                                                                                                                                                                                                                                                                                                                                                                                                                                                                                                                                                                                                                                                                                                                                                                                                                                                                                                                                                                                                                                                                                                                                                                                                                                                                                                                                                                                      | EHC MORGES          | Laboratory of genomics and metagenomics               | Trestan Pillonel, Damien Jacot, Sébastien Aebly, Gilbert Greub, Claire Bertelli                                                                                                                                                                                                                             |                                                                                                                                                                                                                                                                                                                                                                                                                                                                                                       |
| EPI_ISL_2137406                                                                                                                                                                                                                                                                                                                                                                                                                                                                                                                                                                                                                                                                                                                                                                                                                                                                                                                                                                                                                                                                                                                                                                                                                                                                                                                                                                                                                                                                                                                                                                                                                                                                                                                                                                                                                                                                                                                                                                                                                                                                                                                                                                                                                                                                                                                                                                                                                                                                                                                                                                                                                                                                                                                                                                                                                                                                                                                                                                                                                                                                                                                                                                                                                                                                                                                                                                                                                                                                                                                                                                                                                                                                                                                                                                                                                                                                                                                                                                                                                                                                                                                                                                                                                                                                                                                                                                                                                                                                                                                                                                                                                                                                                                                                                                                                                                                                                                                                                                                                                                                                                                                                                                                                                                                                                                                                                                                                                                                                                                                                                                                                                                                                                                                                                                                                                                                                                                                                                                                                                                                                                                                                                                                                                                                                                                                                                                                                                                                                                                                                                                                                                                                                                                                                                                                                                                                                                                                                                                                                                                                                                                                                                                                                                                                                                                                                                                                                                                                                                                                                                                                                                                                                                                                                                                                                                                                                                                      | SYNLAB              | Laboratory of genomics and metagenomics               | Trestan Pillonel, Damien Jacot, Sébastien Aebly, Gilbert Greub, Claire Bertelli                                                                                                                                                                                                                             |                                                                                                                                                                                                                                                                                                                                                                                                                                                                                                       |
| EPI_ISL_2137407                                                                                                                                                                                                                                                                                                                                                                                                                                                                                                                                                                                                                                                                                                                                                                                                                                                                                                                                                                                                                                                                                                                                                                                                                                                                                                                                                                                                                                                                                                                                                                                                                                                                                                                                                                                                                                                                                                                                                                                                                                                                                                                                                                                                                                                                                                                                                                                                                                                                                                                                                                                                                                                                                                                                                                                                                                                                                                                                                                                                                                                                                                                                                                                                                                                                                                                                                                                                                                                                                                                                                                                                                                                                                                                                                                                                                                                                                                                                                                                                                                                                                                                                                                                                                                                                                                                                                                                                                                                                                                                                                                                                                                                                                                                                                                                                                                                                                                                                                                                                                                                                                                                                                                                                                                                                                                                                                                                                                                                                                                                                                                                                                                                                                                                                                                                                                                                                                                                                                                                                                                                                                                                                                                                                                                                                                                                                                                                                                                                                                                                                                                                                                                                                                                                                                                                                                                                                                                                                                                                                                                                                                                                                                                                                                                                                                                                                                                                                                                                                                                                                                                                                                                                                                                                                                                                                                                                                                                      | EHC MORGES          | Laboratory of genomics and metagenomics               | Trestan Pillonel, Damien Jacot, Sébastien Aebly, Gilbert Greub, Claire Bertelli                                                                                                                                                                                                                             |                                                                                                                                                                                                                                                                                                                                                                                                                                                                                                       |
| EPI_ISL_2137408, EPI_ISL_2137409                                                                                                                                                                                                                                                                                                                                                                                                                                                                                                                                                                                                                                                                                                                                                                                                                                                                                                                                                                                                                                                                                                                                                                                                                                                                                                                                                                                                                                                                                                                                                                                                                                                                                                                                                                                                                                                                                                                                                                                                                                                                                                                                                                                                                                                                                                                                                                                                                                                                                                                                                                                                                                                                                                                                                                                                                                                                                                                                                                                                                                                                                                                                                                                                                                                                                                                                                                                                                                                                                                                                                                                                                                                                                                                                                                                                                                                                                                                                                                                                                                                                                                                                                                                                                                                                                                                                                                                                                                                                                                                                                                                                                                                                                                                                                                                                                                                                                                                                                                                                                                                                                                                                                                                                                                                                                                                                                                                                                                                                                                                                                                                                                                                                                                                                                                                                                                                                                                                                                                                                                                                                                                                                                                                                                                                                                                                                                                                                                                                                                                                                                                                                                                                                                                                                                                                                                                                                                                                                                                                                                                                                                                                                                                                                                                                                                                                                                                                                                                                                                                                                                                                                                                                                                                                                                                                                                                                                                     | CHUV                | Laboratory of genomics and metagenomics               | Trestan Pillonel, Damien Jacot, Sébastien Aebly, Gilbert Greub, Claire Bertelli                                                                                                                                                                                                                             |                                                                                                                                                                                                                                                                                                                                                                                                                                                                                                       |
| EPI_ISL_2137410                                                                                                                                                                                                                                                                                                                                                                                                                                                                                                                                                                                                                                                                                                                                                                                                                                                                                                                                                                                                                                                                                                                                                                                                                                                                                                                                                                                                                                                                                                                                                                                                                                                                                                                                                                                                                                                                                                                                                                                                                                                                                                                                                                                                                                                                                                                                                                                                                                                                                                                                                                                                                                                                                                                                                                                                                                                                                                                                                                                                                                                                                                                                                                                                                                                                                                                                                                                                                                                                                                                                                                                                                                                                                                                                                                                                                                                                                                                                                                                                                                                                                                                                                                                                                                                                                                                                                                                                                                                                                                                                                                                                                                                                                                                                                                                                                                                                                                                                                                                                                                                                                                                                                                                                                                                                                                                                                                                                                                                                                                                                                                                                                                                                                                                                                                                                                                                                                                                                                                                                                                                                                                                                                                                                                                                                                                                                                                                                                                                                                                                                                                                                                                                                                                                                                                                                                                                                                                                                                                                                                                                                                                                                                                                                                                                                                                                                                                                                                                                                                                                                                                                                                                                                                                                                                                                                                                                                                                      | SYNLAB              | Laboratory of genomics and metagenomics               | Trestan Pillonel, Damien Jacot, Sébastien Aebly, Gilbert Greub, Claire Bertelli                                                                                                                                                                                                                             |                                                                                                                                                                                                                                                                                                                                                                                                                                                                                                       |
| EPI_ISL_2137411                                                                                                                                                                                                                                                                                                                                                                                                                                                                                                                                                                                                                                                                                                                                                                                                                                                                                                                                                                                                                                                                                                                                                                                                                                                                                                                                                                                                                                                                                                                                                                                                                                                                                                                                                                                                                                                                                                                                                                                                                                                                                                                                                                                                                                                                                                                                                                                                                                                                                                                                                                                                                                                                                                                                                                                                                                                                                                                                                                                                                                                                                                                                                                                                                                                                                                                                                                                                                                                                                                                                                                                                                                                                                                                                                                                                                                                                                                                                                                                                                                                                                                                                                                                                                                                                                                                                                                                                                                                                                                                                                                                                                                                                                                                                                                                                                                                                                                                                                                                                                                                                                                                                                                                                                                                                                                                                                                                                                                                                                                                                                                                                                                                                                                                                                                                                                                                                                                                                                                                                                                                                                                                                                                                                                                                                                                                                                                                                                                                                                                                                                                                                                                                                                                                                                                                                                                                                                                                                                                                                                                                                                                                                                                                                                                                                                                                                                                                                                                                                                                                                                                                                                                                                                                                                                                                                                                                                                                      | CHUV                | Laboratory of genomics and metagenomics               | Trestan Pillonel, Damien Jacot, Sébastien Aebly, Gilbert Greub, Claire Bertelli                                                                                                                                                                                                                             |                                                                                                                                                                                                                                                                                                                                                                                                                                                                                                       |
| EPI_ISL_2151910, EPI_ISL_2151911, EPI_ISL_2151912, EPI_ISL_2151913, EPI_ISL_2151914, EPI_ISL_2151915, EPI_ISL_2151916, EPI_ISL_2151917, EPI_ISL_2151918, EPI_ISL_2151919, EPI_ISL_2151920, EPI_ISL_2151921, EPI_ISL_2151922, EPI_ISL_2151923, EPI_ISL_2151924, EPI_ISL_2151925, EPI_ISL_2151926, EPI_ISL_2151927, EPI_ISL_2151928, EPI_ISL_2151929, EPI_ISL_2151930, EPI_ISL_2151931, EPI_ISL_2151932, EPI_ISL_2151933, EPI_ISL_2151934, EPI_ISL_2151935, EPI_ISL_2151936, EPI_ISL_2151937, EPI_ISL_2151938, EPI_ISL_2151939, EPI_ISL_2151940, EPI_ISL_2151941, EPI_ISL_2151942, EPI_ISL_2151943, EPI_ISL_2151944, EPI_ISL_2151945, EPI_ISL_2151946, EPI_ISL_2151947, EPI_ISL_2151948, EPI_ISL_2151949, EPI_ISL_2151950, EPI_ISL_2151951, EPI_ISL_2151952, EPI_ISL_2151953, EPI_ISL_2151954, EPI_ISL_2151955, EPI_ISL_2151956, EPI_ISL_2151957, EPI_ISL_2151958, EPI_ISL_2151959, EPI_ISL_2151960, EPI_ISL_2151961, EPI_ISL_2151962, EPI_ISL_2151963, EPI_ISL_2151964, EPI_ISL_2151965, EPI_ISL_2151966, EPI_ISL_2151967, EPI_ISL_2151968, EPI_ISL_2151969, EPI_ISL_2151970, EPI_ISL_2151971, EPI_ISL_2151972, EPI_ISL_2151973, EPI_ISL_2151974, EPI_ISL_2151975, EPI_ISL_2151976, EPI_ISL_2151977, EPI_ISL_2151978, EPI_ISL_2151979, EPI_ISL_2151980, EPI_ISL_2151981, EPI_ISL_2151982, EPI_ISL_2151983, EPI_ISL_2151984, EPI_ISL_2151985, EPI_ISL_2151986, EPI_ISL_2151987, EPI_ISL_2151988, EPI_ISL_2151989, EPI_ISL_2151990, EPI_ISL_2151991, EPI_ISL_2151992, EPI_ISL_2151993, EPI_ISL_2151994, EPI_ISL_2151995, EPI_ISL_2151996, EPI_ISL_2151997, EPI_ISL_2151998, EPI_ISL_2151999, EPI_ISL_2152000, EPI_ISL_2152001, EPI_ISL_2152002, EPI_ISL_2152003, EPI_ISL_2152004, EPI_ISL_2152005, EPI_ISL_2152006, EPI_ISL_2152007, EPI_ISL_2152008, EPI_ISL_2152009, EPI_ISL_2152010, EPI_ISL_2152011, EPI_ISL_2152012, EPI_ISL_2152013, EPI_ISL_2152014, EPI_ISL_2152015, EPI_ISL_2152016, EPI_ISL_2152017, EPI_ISL_2152018, EPI_ISL_2152019, EPI_ISL_2152020, EPI_ISL_2152021, EPI_ISL_2152022, EPI_ISL_2152023, EPI_ISL_2152024, EPI_ISL_2152025, EPI_ISL_2152026, EPI_ISL_2152027, EPI_ISL_2152028, EPI_ISL_2152029, EPI_ISL_2152030, EPI_ISL_2152031, EPI_ISL_2152032, EPI_ISL_2152033, EPI_ISL_2152034, EPI_ISL_2152035, EPI_ISL_2152036, EPI_ISL_2152037, EPI_ISL_2152038, EPI_ISL_2152039, EPI_ISL_2152040, EPI_ISL_2152041, EPI_ISL_2152042, EPI_ISL_2152043, EPI_ISL_2152044, EPI_ISL_2152045, EPI_ISL_2152046, EPI_ISL_2152047, EPI_ISL_2152048, EPI_ISL_2152049, EPI_ISL_2152050, EPI_ISL_2152051, EPI_ISL_2152052, EPI_ISL_2152053, EPI_ISL_2152054, EPI_ISL_2152055, EPI_ISL_2152056, EPI_ISL_2152057, EPI_ISL_2152058, EPI_ISL_2152059, EPI_ISL_2152060, EPI_ISL_2152061, EPI_ISL_2152062, EPI_ISL_2152063, EPI_ISL_2152064, EPI_ISL_2152065, EPI_ISL_2152066, EPI_ISL_2152067, EPI_ISL_2152068, EPI_ISL_2152069, EPI_ISL_2152070, EPI_ISL_2152071, EPI_ISL_2152072, EPI_ISL_2152073, EPI_ISL_2152074, EPI_ISL_2152075, EPI_ISL_2152076, EPI_ISL_2152077, EPI_ISL_2152078, EPI_ISL_2152079, EPI_ISL_2152080, EPI_ISL_2152081, EPI_ISL_2152082, EPI_ISL_2152083, EPI_ISL_2152084, EPI_ISL_2152085, EPI_ISL_2152086, EPI_ISL_2152087, EPI_ISL_2152088, EPI_ISL_2152089, EPI_ISL_2152090, EPI_ISL_2152091, EPI_ISL_2152092, EPI_ISL_2152093, EPI_ISL_2152094, EPI_ISL_2152095, EPI_ISL_2152096, EPI_ISL_2152097, EPI_ISL_2152098, EPI_ISL_2152099, EPI_ISL_2152100, EPI_ISL_2152101, EPI_ISL_2152102, EPI_ISL_2152103, EPI_ISL_2152104, EPI_ISL_2152105, EPI_ISL_2152106, EPI_ISL_2152107, EPI_ISL_2152108, EPI_ISL_2152109, EPI_ISL_2152110, EPI_ISL_2152111, EPI_ISL_2152112, EPI_ISL_2152113, EPI_ISL_2152114, EPI_ISL_2152115, EPI_ISL_2152116, EPI_ISL_2152117, EPI_ISL_2152118, EPI_ISL_2152119, EPI_ISL_2152120, EPI_ISL_2152121, EPI_ISL_2152122, EPI_ISL_2152123, EPI_ISL_2152124, EPI_ISL_2152125, EPI_ISL_2152126, EPI_ISL_2152127, EPI_ISL_2152128, EPI_ISL_2152129, EPI_ISL_2152130, EPI_ISL_2152131, EPI_ISL_2152132, EPI_ISL_2152133, EPI_ISL_2152134, EPI_ISL_2152135, EPI_ISL_2152136, EPI_ISL_2152137, EPI_ISL_2152138, EPI_ISL_2152139, EPI_ISL_2152140, EPI_ISL_2152141, EPI_ISL_2152142, EPI_ISL_2152143, EPI_ISL_2152144, EPI_ISL_2152145, EPI_ISL_2152146, EPI_ISL_2152147, EPI_ISL_2152148, EPI_ISL_2152149, EPI_ISL_2152150, EPI_ISL_2152151, EPI_ISL_2152152, EPI_ISL_2152153, EPI_ISL_2152154, EPI_ISL_2152155, EPI_ISL_2152156, EPI_ISL_2152157, EPI_ISL_2152158, EPI_ISL_2152159, EPI_ISL_2152160, EPI_ISL_2152161, EPI_ISL_2152162, EPI_ISL_2152163, EPI_ISL_2152164, EPI_ISL_2152165, EPI_ISL_2152166, EPI_ISL_2152167, EPI_ISL_2152168, EPI_ISL_2152169, EPI_ISL_2152170, EPI_ISL_2152171, EPI_ISL_2152172, EPI_ISL_2152173, EPI_ISL_2152174, EPI_ISL_2152175, EPI_ISL_2152176, EPI_ISL_2152177, EPI_ISL_2152178, EPI_ISL_2152179, EPI_ISL_2152180, EPI_ISL_2152181, EPI_ISL_2152182, EPI_ISL_2152183, EPI_ISL_2152184, EPI_ISL_2152185, EPI_ISL_2152186, EPI_ISL_2152187, EPI_ISL_2152188, EPI_ISL_2152189, EPI_ISL_2152190, EPI_ISL_2152191, EPI_ISL_2152192, EPI_ISL_2152193, EPI_ISL_2152194, EPI_ISL_2152195, EPI_ISL_2152196, EPI_ISL_2152197, EPI_ISL_2152198, EPI_ISL_2152199, EPI_ISL_2152200, EPI_ISL_2152201, EPI_ISL_2152202, EPI_ISL_2152203, EPI_ISL_2152204, EPI_ISL_2152205, EPI_ISL_2152206, EPI_ISL_2152207, EPI_ISL_2152208, EPI_ISL_2152209, EPI_ISL_2152210, EPI_ISL_2152211, EPI_ISL_2152212, EPI_ISL_2152213, EPI_ISL_2152214, EPI_ISL_2152215, EPI_ISL_2152216, EPI_ISL_2152217, EPI_ISL_2152218, EPI_ISL_2152219, EPI_ISL_2152220, EPI_ISL_2152221, EPI_ISL_2152222, EPI_ISL_2152223, EPI_ISL_2152224, EPI_ISL_2152225, EPI_ISL_2152226, EPI_ISL_2152227, EPI_ISL_2152228, EPI_ISL_2152229, EPI_ISL_2152230, EPI_ISL_2152231, EPI_ISL_2152232, EPI_ISL_2152233, EPI_ISL_2152234, EPI_ISL_2152235, EPI_ISL_2152236, EPI_ISL_2152237, EPI_ISL_2152238, EPI_ISL_2152239, EPI_ISL_2152240, EPI_ISL_2152241, EPI_ISL_2152242, EPI_ISL_2152243, EPI_ISL_2152244, EPI_ISL_2152245, EPI_ISL_2152246, EPI_ISL_2152247, EPI_ISL_2152248, EPI_ISL_2152249, EPI_ISL_2152250, EPI_ISL_2152251, EPI_ISL_2152252, EPI_ISL_2152253, EPI_ISL_2152254, EPI_ISL_2152255, EPI_ISL_2152256, EPI_ISL_2152257, EPI_ISL_2152258, EPI_ISL_2152259, EPI_ISL_2152260, EPI_ISL_2152261, EPI_ISL_2152262, EPI_ISL_2152263, EPI_ISL_2152264, EPI_ISL_2152265, EPI_ISL_2152266, EPI_ISL_2152267, EPI_ISL_2152268, EPI_ISL_2152269, EPI_ISL_2152270, EPI_ISL_2152271, EPI_ISL_2152272, EPI_ISL_2152273, EPI_ISL_2152274, EPI_ISL_2152275, EPI_ISL_2152276, EPI_ISL_2152277, EPI_ISL_2152278, EPI_ISL_2152279, EPI_ISL_2152280, EPI_ISL_2152281, EPI_ISL_2152282, EPI_ISL_2152283, EPI_ISL_2152284, EPI_ISL_2152285, EPI_ISL_2152286, EPI_ISL_2152287, EPI_ISL_2152288, EPI_ISL_2152289, EPI_ISL_2152290, EPI_ISL_2152291, EPI_ISL_2152292, EPI_ISL_2152293, EPI_ISL_2152294, EPI_ISL_2152295, EPI_ISL_2152296, EPI_ISL_2152297, EPI_ISL_2152298, EPI_ISL_2152299, EPI_ISL_215300, EPI_ISL_215301, EPI_ISL_215302, EPI_ISL_215303, EPI_ISL_215304, EPI_ISL_215305, EPI_ISL_215306, EPI_ISL_215307, EPI_ISL_215308, EPI_ISL_215309, EPI_ISL_215310, EPI_ISL_215311, EPI_ISL_215312, EPI_ISL_215313, EPI_ISL_215314, EPI_ISL_215315, EPI_ISL_215316, EPI_ISL_215317, EPI_ISL_215318, EPI_ISL_215319, EPI_ISL_215320, EPI_ISL_215321, EPI_ISL_215322, EPI_ISL_215323, EPI_ISL_215324, EPI_ISL_215325, EPI_ISL_215326, EPI_ISL_215327, EPI_ISL_215328, EPI_ISL_215329, EPI_ISL_215330, EPI_ISL_215331, EPI_ISL_215332, EPI_ISL_215333, EPI_ISL_215334, EPI_ISL_215335, EPI_ISL_215336, EPI_ISL_215337, EPI_ISL_215338, EPI_ISL_215339, EPI_ISL_215340, EPI_ISL_215341, EPI_ISL_215342, EPI_ISL_215343, EPI_ISL_215344, EPI_ISL_215345, EPI_ISL_215346, EPI_ISL_215347, EPI_ISL_215348, EPI_ISL_215349, EPI_ISL_215350, EPI_ISL_215351, EPI_ISL_215352, EPI_ISL_215353, EPI_ISL_215354, EPI_ISL_215355, EPI_ISL_215356, EPI_ISL_215357, EPI_ISL_215358, EPI_ISL_215359, EPI_ISL_215360 | see above           | Viollier AG                                           | Department of Biosystems Science and Engineering, ETH Zürich                                                                                                                                                                                                                                                | Chaoran Chen, Sarah Nadeau, Catharine Aquino, Ivan Topolsky, Philipp Jablonski, Lara Fuhrmann, David Dreifuss, Katharina Jahn, Daniel Ehram, Isabel Stürmer, Andrea Cabral de Gouvea, Maria Domenica Moccia, Simon Grüter, Timothy Sykes, Lennart Opitz, Griffin White, Laura Neff, Doris Popovic, Andrea Patrignani, Jay Tracy, Ralph Schlapbach, Christiane Beckmann, Maurice Redondo, Olivier Kobel, Christoph Noppen, Sophie Seidel, Noemie Santamaría de Souza, Niko Beerenwinkel, Tanja Stadler |
| EPI_ISL_2153436, EPI_ISL_2153437, EPI_ISL_2153438, EPI_ISL_2153439, EPI_ISL_2153440, EPI_ISL_2153441, EPI_ISL_2153442, EPI_ISL_2153443, EPI_ISL_2153444, EPI_ISL_2153445, EPI_ISL_2153446, EPI_ISL_2153447, EPI_ISL_2153448, EPI_ISL_2153449, EPI_ISL_2153450, EPI_ISL_2153451, EPI_ISL_2153452, EPI_ISL_2153453, EPI_ISL_2153454, EPI_ISL_2153455, EPI_ISL_2153456, EPI_ISL_2153457, EPI_ISL_2153458, EPI_ISL_2153459, EPI_ISL_2153460, EPI_ISL_2153461, EPI_ISL_2153462, EPI_ISL_2153463, EPI_ISL_2153464, EPI_ISL_2153465, EPI_ISL_2153466, EPI_ISL_2153467, EPI_ISL_2153468, EPI_ISL_2153469, EPI_ISL_2153470, EPI_ISL_2153471, EPI_ISL_2153472, EPI_ISL_2153473, EPI_ISL_2153474, EPI_ISL_2153475                                                                                                                                                                                                                                                                                                                                                                                                                                                                                                                                                                                                                                                                                                                                                                                                                                                                                                                                                                                                                                                                                                                                                                                                                                                                                                                                                                                                                                                                                                                                                                                                                                                                                                                                                                                                                                                                                                                                                                                                                                                                                                                                                                                                                                                                                                                                                                                                                                                                                                                                                                                                                                                                                                                                                                                                                                                                                                                                                                                                                                                                                                                                                                                                                                                                                                                                                                                                                                                                                                                                                                                                                                                                                                                                                                                                                                                                                                                                                                                                                                                                                                                                                                                                                                                                                                                                                                                                                                                                                                                                                                                                                                                                                                                                                                                                                                                                                                                                                                                                                                                                                                                                                                                                                                                                                                                                                                                                                                                                                                                                                                                                                                                                                                                                                                                                                                                                                                                                                                                                                                                                                                                                                                                                                                                                                                                                                                                                                                                                                                                                                                                                                                                                                                                                                                                                                                                                                                                                                                                                                                                                                                                                                                                                               | see above           | Institute for Infectious Diseases, University of Bern | Institute for Infectious Diseases, University of Bern                                                                                                                                                                                                                                                       | Stefan Neuenchwander, Christian Baumann, Miguel A Terrazos Miani, Cora Säggerer, Pascal Bittel, Peter Keller, Franziska Suter-Rinkler, Stephen L Leib, Alban Ramette                                                                                                                                                                                                                                                                                                                                  |
